# Supplementary material for: Zygotic gene activation in the chicken occurs in two waves, the first involving only maternally derived genes
Source: eLife journal article supplement (doi:10.7554/elife.39381), 2018-10-30
Supplement: supp [file elife-39381-supp-v1.zip]

Archive with 15 entries (15 files):
- elife_poa_e39381_Supplementary_File_1.xlsx
- elife_poa_e39381_Figure_3_figure_supplement_1.tif
- elife_poa_e39381_Figure_2_figure_supplement_1.tif
- elife_poa_e39381_Supplementary_File_5.xlsx
- elife_poa_e39381_Figure_1_figure_supplement_2.tif
- elife_poa_e39381_Supplementary_File_3.xlsx
- elife_poa_e39381_Figure_1_figure_supplement_1.tif
- elife_poa_e39381_Supplementary_File_4.xlsx
- elife_poa_e39381_Source_code_1.zip
- elife_poa_e39381_Figure_1_figure_supplement_3.tif
- elife_poa_e39381_Supplementary_File_6.xlsx
- elife_poa_e39381_Figure_4_figure_supplement_1.tif
- elife_poa_e39381_Transparent_Reporting_File.pdf
- elife_poa_e39381_Figure_3_figure_supplement_2.tif
- elife_poa_e39381_Supplementary_File_2.xlsx
