# Supplementary material for: Zygotic gene activation in the chicken occurs in two waves, the first involving only maternally derived genes
Source: eLife journal article supplement (doi:10.7554/elife.39381), 2018-10-30
Supplement: supp [file elife-39381-supp-v1.zip › elife_poa_e39381_Supplementary_File_1.xlsx]

## Sheet: Supplemtary file 1
Supplementary file 1. Gene list and expression of transcripts for exon–intron PCR
The genes of 1st wave of activation
Gene symbol	Associated Gene Name	FDR_Oocyte_Zygote_Intron	logFC_Oocyte_Zygote_Intron
ENSGALG00000023195	DLX6	4.16131e-14	6.96306
ENSGALG00000005909	GATA2	1.61643e-16	3.95201
ENSGALG00000006810	ZIC4	1.26073e-09	4.37107
ENSGALG00000027870	LYPD2	4.97182e-05	5.12908
ENSGALG00000004239	IFITM5	2.56273e-06	4.38063
ENSGALG00000018503	NKX6-3	7.05684e-05	3.87381
The genes of 2nd wave of activation
Gene symbol	Associated Gene Name	FDR_EGK.III_EGK.VI_Intron	logFC_EGK.III_EGK.VI_Intron
ENSGALG00000000839	WNT11	4.67651e-27	11.2773
ENSGALG00000005396	WNT3A	3.8298e-28	10.5697
ENSGALG00000024487	C8ORF22	5.26612e-16	9.93013
ENSGALG00000015696	NAT8L	3.67352e-14	9.59976
ENSGALG00000002623	PCOLCE2	7.3276e-10	8.90771
ENSGALG00000015656	AKAP2	1.42158e-13	8.79298
