# Supplementary material for: Zygotic gene activation in the chicken occurs in two waves, the first involving only maternally derived genes
Source: eLife journal article supplement (doi:10.7554/elife.39381), 2018-10-30
Supplement: supp [file elife-39381-supp-v1.zip › elife_poa_e39381_Supplementary_File_2.xlsx]

## Sheet: Supplementary file 2A
Supplementary file 2A. Total RNA quantity of a single chicken early embryo
No.	Sample ID.	Ribogreen	Volume	Amount
		Con. (ng/ul)	(ul)	(ng)
1	fWL1 Oocyte	98.5	20	1970
2	fWL2 Oocyte	88.6	20	1772
3	fWL3 Oocyte	136.3	20	2726
4	fWL 1 x mKO 1 Zygote	77.8	20	1556
5	fWL 2 x mKO 2 Zygote	116.9	20	2338
6	fWL 3 x mKO 3 Zygote	93.1	20	1862
7	fWL 1 x mKO 1 EGK.X	114.9	20	2298
8	fWL 2 x mKO 2 EGK.X	121.4	20	2428
9	fWL 3 x mKO 3 EGK.X	100.4	20	2008

## Sheet: Supplementary file 2B
Supplementary file 2B. Up-regulated intronic expression between single oocyte and zygote (FDR-adjusted P < 0.05)
	Oocyte → Zygote	Zygote → EGK.X
Up	5312	5438
Down	3328	3843
