# Supplementary material for: Zygotic gene activation in the chicken occurs in two waves, the first involving only maternally derived genes
Source: eLife journal article supplement (doi:10.7554/elife.39381), 2018-10-30
Supplement: supp [file elife-39381-supp-v1.zip › elife_poa_e39381_Supplementary_File_3.xlsx]

## Sheet: Supplementary file 3A
Supplementary file 3A. Variant calling of single hybrid embryo RNA-Seq for determining which parental allele was expressed
Gene symbol	SNP Counts	Cluster
ENSGALG00000000109	2	Maternal_Bi
ENSGALG00000000129	3	Maternal_Bi
ENSGALG00000000177	4	Maternal_Bi
ENSGALG00000000234	3	Maternal_Bi
ENSGALG00000000258	5	Maternal_Bi
ENSGALG00000000299	4	Maternal_Bi
ENSGALG00000000305	3	Maternal_Bi
ENSGALG00000000513	4	Maternal_Bi
ENSGALG00000000516	17	Maternal_Bi
ENSGALG00000000540	3	Maternal_Bi
ENSGALG00000000581	3	Maternal_Bi
ENSGALG00000000608	7	Maternal_Bi
ENSGALG00000000632	5	Maternal_Bi
ENSGALG00000000638	3	Maternal_Bi
ENSGALG00000000657	5	Maternal_Bi
ENSGALG00000000671	5	Maternal_Bi
ENSGALG00000000693	2	Maternal_Bi
ENSGALG00000000699	6	Maternal_Bi
ENSGALG00000000701	3	Maternal_Bi
ENSGALG00000000713	2	Maternal_Bi
ENSGALG00000000721	7	Maternal_Bi
ENSGALG00000000771	2	Maternal_Bi
ENSGALG00000000794	4	Maternal_Bi
ENSGALG00000000816	2	Maternal_Bi
ENSGALG00000000939	2	Maternal_Bi
ENSGALG00000000982	2	Maternal_Bi
ENSGALG00000001020	5	Maternal_Bi
ENSGALG00000001126	5	Maternal_Bi
ENSGALG00000001182	2	Maternal_Bi
ENSGALG00000001231	4	Maternal_Bi
ENSGALG00000001270	2	Maternal_Bi
ENSGALG00000001420	2	Maternal_Bi
ENSGALG00000001479	2	Maternal_Bi
ENSGALG00000001482	4	Maternal_Bi
ENSGALG00000001492	4	Maternal_Bi
ENSGALG00000001516	3	Maternal_Bi
ENSGALG00000001522	2	Maternal_Bi
ENSGALG00000001536	8	Maternal_Bi
ENSGALG00000001540	4	Maternal_Bi
ENSGALG00000001672	6	Maternal_Bi
ENSGALG00000001692	3	Maternal_Bi
ENSGALG00000001722	2	Maternal_Bi
ENSGALG00000001732	2	Maternal_Bi
ENSGALG00000001775	8	Maternal_Bi
ENSGALG00000001779	4	Maternal_Bi
ENSGALG00000001907	2	Maternal_Bi
ENSGALG00000001910	2	Maternal_Bi
ENSGALG00000002030	2	Maternal_Bi
ENSGALG00000002041	7	Maternal_Bi
ENSGALG00000002144	6	Maternal_Bi
ENSGALG00000002158	2	Maternal_Bi
ENSGALG00000002242	3	Maternal_Bi
ENSGALG00000002272	2	Maternal_Bi
ENSGALG00000002284	8	Maternal_Bi
ENSGALG00000002336	2	Maternal_Bi
ENSGALG00000002354	2	Maternal_Bi
ENSGALG00000002398	4	Maternal_Bi
ENSGALG00000002412	2	Maternal_Bi
ENSGALG00000002447	2	Maternal_Bi
ENSGALG00000002461	2	Maternal_Bi
ENSGALG00000002489	2	Maternal_Bi
ENSGALG00000002527	2	Maternal_Bi
ENSGALG00000002553	4	Maternal_Bi
ENSGALG00000002591	2	Maternal_Bi
ENSGALG00000002622	2	Maternal_Bi
ENSGALG00000002695	2	Maternal_Bi
ENSGALG00000002699	3	Maternal_Bi
ENSGALG00000002712	3	Maternal_Bi
ENSGALG00000002781	3	Maternal_Bi
ENSGALG00000002818	2	Maternal_Bi
ENSGALG00000002839	3	Maternal_Bi
ENSGALG00000002880	2	Maternal_Bi
ENSGALG00000002932	2	Maternal_Bi
ENSGALG00000002943	7	Maternal_Bi
ENSGALG00000002971	8	Maternal_Bi
ENSGALG00000002984	3	Maternal_Bi
ENSGALG00000002985	8	Maternal_Bi
ENSGALG00000003011	2	Maternal_Bi
ENSGALG00000003168	3	Maternal_Bi
ENSGALG00000003194	3	Maternal_Bi
ENSGALG00000003392	3	Maternal_Bi
ENSGALG00000003527	2	Maternal_Bi
ENSGALG00000003620	4	Maternal_Bi
ENSGALG00000003663	11	Maternal_Bi
ENSGALG00000003712	2	Maternal_Bi
ENSGALG00000003719	4	Maternal_Bi
ENSGALG00000003739	4	Maternal_Bi
ENSGALG00000003959	4	Maternal_Bi
ENSGALG00000004291	2	Maternal_Bi
ENSGALG00000004378	6	Maternal_Bi
ENSGALG00000004471	5	Maternal_Bi
ENSGALG00000004575	3	Maternal_Bi
ENSGALG00000004578	2	Maternal_Bi
ENSGALG00000004584	19	Maternal_Bi
ENSGALG00000004599	5	Maternal_Bi
ENSGALG00000004602	3	Maternal
ENSGALG00000004612	8	Maternal_Bi
ENSGALG00000004637	3	Maternal_Bi
ENSGALG00000004661	4	Maternal_Bi
ENSGALG00000004670	3	Maternal_Bi
ENSGALG00000004679	3	Maternal_Bi
ENSGALG00000004691	6	Maternal_Bi
ENSGALG00000004728	3	Maternal_Bi
ENSGALG00000004750	2	Maternal_Bi
ENSGALG00000004800	4	Maternal_Bi
ENSGALG00000004886	2	Maternal_Bi
ENSGALG00000004958	2	Maternal_Bi
ENSGALG00000004959	2	Maternal_Bi
ENSGALG00000004960	4	Maternal_Bi
ENSGALG00000005046	2	Maternal_Bi
ENSGALG00000005054	3	Maternal_Bi
ENSGALG00000005071	3	Maternal_Bi
ENSGALG00000005205	2	Maternal_Bi
ENSGALG00000005269	2	Maternal_Bi
ENSGALG00000005337	2	Maternal_Bi
ENSGALG00000005367	2	Maternal_Bi
ENSGALG00000005673	2	Maternal_Bi
ENSGALG00000005682	4	Maternal_Bi
ENSGALG00000005703	4	Maternal_Bi
ENSGALG00000005846	2	Maternal_Bi
ENSGALG00000005855	7	Maternal_Bi
ENSGALG00000005904	2	Maternal_Bi
ENSGALG00000006016	5	Maternal_Bi
ENSGALG00000006047	2	Maternal_Bi
ENSGALG00000006051	2	Maternal_Bi
ENSGALG00000006080	3	Maternal_Bi
ENSGALG00000006118	2	Maternal_Bi
ENSGALG00000006122	2	Maternal_Bi
ENSGALG00000006281	3	Maternal_Bi
ENSGALG00000006298	3	Maternal_Bi
ENSGALG00000006305	2	Maternal_Bi
ENSGALG00000006401	2	Maternal_Bi
ENSGALG00000006405	2	Maternal_Bi
ENSGALG00000006418	4	Maternal_Bi
ENSGALG00000006437	8	Maternal_Bi
ENSGALG00000006472	2	Maternal_Bi
ENSGALG00000006561	2	Maternal_Bi
ENSGALG00000006630	3	Maternal_Bi
ENSGALG00000006646	4	Maternal_Bi
ENSGALG00000006658	2	Maternal_Bi
ENSGALG00000006694	2	Maternal_Bi
ENSGALG00000006773	2	Maternal_Bi
ENSGALG00000006775	3	Maternal_Bi
ENSGALG00000006786	5	Maternal_Bi
ENSGALG00000006788	2	Maternal_Bi
ENSGALG00000006791	2	Maternal_Bi
ENSGALG00000006925	3	Maternal_Bi
ENSGALG00000006960	2	Maternal_Bi
ENSGALG00000007089	3	Maternal_Bi
ENSGALG00000007119	5	Maternal_Bi
ENSGALG00000007128	2	Maternal_Bi
ENSGALG00000007151	4	Maternal_Bi
ENSGALG00000007276	5	Maternal_Bi
ENSGALG00000007307	2	Maternal_Bi
ENSGALG00000007334	2	Maternal_Bi
ENSGALG00000007354	2	Maternal_Bi
ENSGALG00000007373	8	Maternal_Bi
ENSGALG00000007412	6	Maternal_Bi
ENSGALG00000007439	4	Maternal_Bi
ENSGALG00000007447	4	Maternal_Bi
ENSGALG00000007462	2	Maternal_Bi
ENSGALG00000007591	2	Maternal_Bi
ENSGALG00000007644	2	Maternal_Bi
ENSGALG00000007665	4	Maternal_Bi
ENSGALG00000007686	4	Maternal_Bi
ENSGALG00000007829	2	Maternal_Bi
ENSGALG00000007928	2	Maternal_Bi
ENSGALG00000008103	2	Maternal_Bi
ENSGALG00000008162	3	Maternal_Bi
ENSGALG00000008174	3	Maternal_Bi
ENSGALG00000008180	2	Maternal_Bi
ENSGALG00000008217	2	Maternal_Bi
ENSGALG00000008219	3	Maternal_Bi
ENSGALG00000008229	2	Maternal_Bi
ENSGALG00000008254	3	Maternal_Bi
ENSGALG00000008257	7	Maternal_Bi
ENSGALG00000008410	8	Maternal_Bi
ENSGALG00000008561	4	Maternal_Bi
ENSGALG00000008618	2	Maternal_Bi
ENSGALG00000008764	2	Maternal_Bi
ENSGALG00000008771	2	Maternal_Bi
ENSGALG00000008803	3	Maternal_Bi
ENSGALG00000008806	3	Maternal_Bi
ENSGALG00000008813	2	Maternal_Bi
ENSGALG00000008819	3	Maternal_Bi
ENSGALG00000008838	3	Maternal_Bi
ENSGALG00000008933	2	Maternal_Bi
ENSGALG00000009001	4	Maternal_Bi
ENSGALG00000009031	2	Maternal_Bi
ENSGALG00000009042	2	Maternal_Bi
ENSGALG00000009057	2	Maternal_Bi
ENSGALG00000009083	9	Maternal_Bi
ENSGALG00000009158	3	Maternal_Bi
ENSGALG00000009252	5	Maternal_Bi
ENSGALG00000009283	3	Maternal_Bi
ENSGALG00000009381	5	Maternal_Bi
ENSGALG00000009437	2	Maternal_Bi
ENSGALG00000009452	2	Maternal_Bi
ENSGALG00000009533	2	Maternal_Bi
ENSGALG00000009626	2	Maternal_Bi
ENSGALG00000009837	2	Maternal_Bi
ENSGALG00000009840	2	Maternal_Bi
ENSGALG00000009854	3	Maternal_Bi
ENSGALG00000010001	3	Maternal_Bi
ENSGALG00000010020	2	Maternal_Bi
ENSGALG00000010030	2	Maternal_Bi
ENSGALG00000010127	6	Maternal_Bi
ENSGALG00000010164	2	Maternal_Bi
ENSGALG00000010166	3	Maternal_Bi
ENSGALG00000010234	5	Maternal_Bi
ENSGALG00000010235	2	Maternal_Bi
ENSGALG00000010255	2	Maternal_Bi
ENSGALG00000010265	12	Maternal_Bi
ENSGALG00000010341	6	Maternal_Bi
ENSGALG00000010360	6	Maternal_Bi
ENSGALG00000010448	4	Maternal_Bi
ENSGALG00000010541	3	Maternal_Bi
ENSGALG00000010677	3	Maternal_Bi
ENSGALG00000010719	7	Maternal_Bi
ENSGALG00000010738	4	Maternal_Bi
ENSGALG00000010766	3	Maternal_Bi
ENSGALG00000010827	3	Maternal_Bi
ENSGALG00000010934	2	Maternal_Bi
ENSGALG00000010940	3	Maternal
ENSGALG00000011015	2	Maternal_Bi
ENSGALG00000011068	9	Maternal_Bi
ENSGALG00000011481	6	Maternal_Bi
ENSGALG00000011488	4	Maternal_Bi
ENSGALG00000011517	2	Maternal_Bi
ENSGALG00000011639	3	Maternal_Bi
ENSGALG00000011643	9	Maternal_Bi
ENSGALG00000011655	2	Maternal_Bi
ENSGALG00000011689	4	Maternal_Bi
ENSGALG00000011811	3	Maternal_Bi
ENSGALG00000011833	3	Maternal_Bi
ENSGALG00000011893	3	Maternal_Bi
ENSGALG00000012025	2	Maternal_Bi
ENSGALG00000012044	4	Maternal_Bi
ENSGALG00000012048	3	Maternal_Bi
ENSGALG00000012089	6	Maternal_Bi
ENSGALG00000012171	2	Maternal_Bi
ENSGALG00000012244	2	Maternal_Bi
ENSGALG00000012256	9	Maternal_Bi
ENSGALG00000012263	5	Maternal_Bi
ENSGALG00000012321	3	Maternal_Bi
ENSGALG00000012395	3	Maternal_Bi
ENSGALG00000012455	3	Maternal_Bi
ENSGALG00000012588	3	Maternal_Bi
ENSGALG00000012615	2	Maternal_Bi
ENSGALG00000012680	3	Maternal_Bi
ENSGALG00000012898	2	Maternal_Bi
ENSGALG00000012903	3	Maternal_Bi
ENSGALG00000012909	4	Maternal_Bi
ENSGALG00000012988	2	Maternal_Bi
ENSGALG00000013005	3	Maternal_Bi
ENSGALG00000013053	2	Maternal_Bi
ENSGALG00000013063	2	Maternal_Bi
ENSGALG00000013117	4	Maternal
ENSGALG00000013493	2	Maternal_Bi
ENSGALG00000013573	12	Maternal_Bi
ENSGALG00000013605	2	Maternal_Bi
ENSGALG00000013647	2	Maternal_Bi
ENSGALG00000013677	6	Maternal_Bi
ENSGALG00000013773	5	Maternal_Bi
ENSGALG00000013795	3	Maternal_Bi
ENSGALG00000013803	2	Maternal_Bi
ENSGALG00000013804	2	Maternal_Bi
ENSGALG00000014036	3	Maternal_Bi
ENSGALG00000014163	3	Maternal_Bi
ENSGALG00000014270	4	Maternal_Bi
ENSGALG00000014281	18	Maternal_Bi
ENSGALG00000014337	2	Maternal_Bi
ENSGALG00000014404	5	Maternal_Bi
ENSGALG00000014408	3	Maternal_Bi
ENSGALG00000014649	2	Maternal_Bi
ENSGALG00000014652	2	Maternal_Bi
ENSGALG00000014684	3	Maternal_Bi
ENSGALG00000014779	2	Maternal
ENSGALG00000014784	15	Maternal_Bi
ENSGALG00000014788	4	Maternal_Bi
ENSGALG00000014815	2	Maternal_Bi
ENSGALG00000014836	4	Maternal_Bi
ENSGALG00000014852	2	Maternal_Bi
ENSGALG00000014865	3	Maternal_Bi
ENSGALG00000014923	2	Maternal
ENSGALG00000014936	4	Maternal_Bi
ENSGALG00000014960	3	Maternal_Bi
ENSGALG00000014974	7	Maternal_Bi
ENSGALG00000014982	4	Maternal_Bi
ENSGALG00000015004	17	Maternal_Bi
ENSGALG00000015011	6	Maternal_Bi
ENSGALG00000015027	4	Maternal_Bi
ENSGALG00000015030	11	Maternal_Bi
ENSGALG00000015038	3	Maternal_Bi
ENSGALG00000015059	3	Maternal_Bi
ENSGALG00000015064	3	Maternal_Bi
ENSGALG00000015069	2	Maternal_Bi
ENSGALG00000015071	6	Maternal_Bi
ENSGALG00000015086	2	Maternal_Bi
ENSGALG00000015093	3	Maternal_Bi
ENSGALG00000015105	2	Maternal_Bi
ENSGALG00000015106	5	Maternal
ENSGALG00000015152	2	Maternal_Bi
ENSGALG00000015170	4	Maternal_Bi
ENSGALG00000015179	4	Maternal_Bi
ENSGALG00000015331	5	Maternal_Bi
ENSGALG00000015406	2	Maternal
ENSGALG00000015471	2	Maternal_Bi
ENSGALG00000015479	2	Maternal_Bi
ENSGALG00000015486	4	Maternal_Bi
ENSGALG00000015524	2	Maternal_Bi
ENSGALG00000015539	8	Maternal_Bi
ENSGALG00000015556	2	Maternal_Bi
ENSGALG00000015589	3	Maternal_Bi
ENSGALG00000015611	3	Maternal_Bi
ENSGALG00000015665	3	Maternal_Bi
ENSGALG00000015836	2	Maternal_Bi
ENSGALG00000015916	2	Maternal_Bi
ENSGALG00000015955	2	Maternal_Bi
ENSGALG00000015957	2	Maternal_Bi
ENSGALG00000015980	5	Maternal_Bi
ENSGALG00000015984	2	Maternal_Bi
ENSGALG00000015985	2	Maternal_Bi
ENSGALG00000016026	4	Maternal_Bi
ENSGALG00000016034	2	Maternal_Bi
ENSGALG00000016070	7	Maternal_Bi
ENSGALG00000016092	5	Maternal_Bi
ENSGALG00000016125	3	Maternal_Bi
ENSGALG00000016174	4	Maternal_Bi
ENSGALG00000016282	7	Maternal_Bi
ENSGALG00000016289	4	Maternal_Bi
ENSGALG00000016320	4	Maternal_Bi
ENSGALG00000016409	2	Maternal_Bi
ENSGALG00000016424	4	Maternal_Bi
ENSGALG00000016427	3	Maternal_Bi
ENSGALG00000016438	2	Maternal_Bi
ENSGALG00000016439	3	Maternal_Bi
ENSGALG00000016456	2	Maternal_Bi
ENSGALG00000016576	5	Maternal_Bi
ENSGALG00000016605	2	Maternal_Bi
ENSGALG00000016608	3	Maternal_Bi
ENSGALG00000016609	10	Maternal_Bi
ENSGALG00000016649	4	Maternal_Bi
ENSGALG00000016686	4	Maternal_Bi
ENSGALG00000016691	2	Maternal_Bi
ENSGALG00000016702	4	Maternal_Bi
ENSGALG00000016719	2	Maternal_Bi
ENSGALG00000016732	3	Maternal_Bi
ENSGALG00000016860	2	Maternal_Bi
ENSGALG00000016870	5	Maternal_Bi
ENSGALG00000016991	2	Maternal_Bi
ENSGALG00000017071	2	Maternal_Bi
ENSGALG00000017112	2	Maternal_Bi
ENSGALG00000017128	7	Maternal_Bi
ENSGALG00000017159	4	Maternal_Bi
ENSGALG00000017392	4	Maternal_Bi
ENSGALG00000018800	3	Maternal_Bi
ENSGALG00000018967	8	Maternal_Bi
ENSGALG00000019201	2	Maternal_Bi
ENSGALG00000019211	4	Maternal_Bi
ENSGALG00000019228	2	Maternal_Bi
ENSGALG00000019336	4	Maternal_Bi
ENSGALG00000019710	3	Maternal_Bi
ENSGALG00000019891	4	Maternal_Bi
ENSGALG00000020003	2	Maternal_Bi
ENSGALG00000020561	7	Maternal_Bi
ENSGALG00000020729	2	Maternal_Bi
ENSGALG00000020878	3	Maternal_Bi
ENSGALG00000020893	16	Maternal_Bi
ENSGALG00000021511	4	Maternal_Bi
ENSGALG00000021634	5	Maternal_Bi
ENSGALG00000022490	2	Maternal_Bi
ENSGALG00000022891	2	Maternal_Bi
ENSGALG00000022920	5	Maternal_Bi
ENSGALG00000023616	2	Maternal_Bi
ENSGALG00000023683	2	Maternal_Bi
ENSGALG00000023731	3	Maternal_Bi
ENSGALG00000025712	2	Maternal_Bi
ENSGALG00000025810	2	Maternal_Bi
ENSGALG00000026113	3	Maternal_Bi
ENSGALG00000026144	3	Maternal_Bi
ENSGALG00000026159	2	Maternal_Bi
ENSGALG00000026231	2	Maternal_Bi
ENSGALG00000026291	9	Maternal_Bi
ENSGALG00000026460	2	Maternal_Bi
ENSGALG00000026505	2	Maternal_Bi
ENSGALG00000026542	4	Maternal_Bi
ENSGALG00000026757	3	Maternal_Bi
ENSGALG00000026900	3	Maternal_Bi
ENSGALG00000027143	3	Maternal_Bi
ENSGALG00000027190	11	Maternal_Bi
ENSGALG00000027191	2	Maternal_Bi
ENSGALG00000027482	2	Maternal_Bi
ENSGALG00000027871	8	Maternal_Bi
ENSGALG00000027874	2	Maternal_Bi
ENSGALG00000028015	2	Maternal_Bi
ENSGALG00000028084	4	Maternal_Bi
ENSGALG00000028148	10	Maternal_Bi
ENSGALG00000028440	2	Maternal_Bi
ENSGALG00000028543	4	Maternal_Bi
ENSGALG00000028691	3	Maternal_Bi
ENSGALG00000028696	2	Maternal_Bi
ENSGALG00000028821	2	Maternal_Bi
ENSGALG00000028967	7	Maternal_Bi
ENSGALG00000029109	2	Maternal_Bi
ALDBGALG0000000155	3	Maternal_Bi
ALDBGALG0000000159	4	Maternal_Bi
ALDBGALG0000000492	2	Maternal_Bi
ALDBGALG0000001196	3	Maternal_Bi
ALDBGALG0000001304	2	Maternal_Bi
ALDBGALG0000001553	2	Maternal_Bi
ALDBGALG0000001582	3	Maternal_Bi
ALDBGALG0000001742	5	Maternal_Bi
ALDBGALG0000001820	9	Maternal
ALDBGALG0000002562	2	Maternal_Bi
ALDBGALG0000002716	3	Maternal_Bi
ALDBGALG0000003224	3	Maternal_Bi
ALDBGALG0000003328	2	Maternal_Bi
ALDBGALG0000003669	4	Maternal_Bi
ALDBGALG0000003866	2	Maternal_Bi
ALDBGALG0000004579	3	Maternal_Bi
ALDBGALG0000005157	2	Maternal
ALDBGALG0000005226	3	Maternal_Bi
ALDBGALG0000005723	2	Maternal_Bi

## Sheet: Supplementary file 3B
Supplementary file 3B. Gene list and expression of genotyped transcripts by Sanger sequencing
Gene symbol	Associated Gene Name	FDR_Oocyte_Zygote_DEG	logFC_Oocyte_Zygote_DEG	FDR_Oocyte_Zygote_Intron	logFC_Oocyte_Zygote_Intron
ENSGALG00000021634	MAP7D1	1.07761e-05	1.02355	2.12168e-23	2.63019
ENSGALG00000025810	CCNB3	2.388e-08	0.816495	2.02534e-13	2.37239
ENSGALG00000016439	GRHL1	0.033527	0.708823	1.57937e-15	2.61796
ENSGALG00000014936	ESCO1	0.00138217	0.700238	4.14068e-11	1.55048
ENSGALG00000006786	SYTL4	0.0138803	0.653132	4.15171e-14	2.24957
ENSGALG00000014408	LLGL1	0.0137821	0.650003	4.73383e-14	2.30009
