# Supplementary material for: Zygotic gene activation in the chicken occurs in two waves, the first involving only maternally derived genes
Source: eLife journal article supplement (doi:10.7554/elife.39381), 2018-10-30
Supplement: supp [file elife-39381-supp-v1.zip › elife_poa_e39381_Supplementary_File_4.xlsx]

## Sheet: Supplementary file 4
Supplementary file 4. Significantly detected biological processes of GO and KEGG pathways based on up-regulated DEGs between single oocyte and zygote
Significantly detected BP terms of GO based on up-regulated DEGs between oocyte and zygote (enrichment test P-value < 0.05)
GO term	# of genes	%	P-value
DNA replication initiation	11	0.790798	3.1139e-07
DNA replication	20	1.43781	4.26233e-06
cellular response to DNA damage stimulus	21	1.50971	7.14557e-05
cell division	21	1.50971	7.14557e-05
DNA repair	23	1.65349	0.000256157
positive regulation of transcription from RNA polymerase II promoter	68	4.88857	0.000362046
chromosome segregation	13	0.934579	0.000369909
ATP-dependent chromatin remodeling	8	0.575126	0.000438456
cell cycle	14	1.00647	0.000562001
mitotic cytokinesis	9	0.647017	0.000605354
G1/S transition of mitotic cell cycle	12	0.862689	0.000676437
actin cytoskeleton organization	16	1.15025	0.000794607
regulation of transcription, DNA-templated	61	4.38533	0.00173712
peptidyl-serine phosphorylation	20	1.43781	0.00184499
negative regulation of transcription from RNA polymerase II promoter	50	3.59454	0.00185763
microtubule-based movement	14	1.00647	0.00201099
organ morphogenesis	11	0.790798	0.0020721
base-excision repair	9	0.647017	0.00240441
double-strand break repair via homologous recombination	14	1.00647	0.00242666
neural tube closure	13	0.934579	0.00351887
meiotic chromosome segregation	4	0.287563	0.00436646
double-strand break repair	9	0.647017	0.00544584
mismatch repair	6	0.431344	0.00553089
somatic hypermutation of immunoglobulin genes	5	0.359454	0.00617383
mRNA catabolic process	5	0.359454	0.00617383
gastrulation with mouth forming second	6	0.431344	0.00821339
protein monoubiquitination	7	0.503235	0.008429
mitotic chromosome condensation	5	0.359454	0.0101889
regulation of cell shape	16	1.15025	0.0110435
G2 DNA damage checkpoint	6	0.431344	0.0116791
regulation of small GTPase mediated signal transduction	6	0.431344	0.0116791
spindle assembly	6	0.431344	0.0116791
mRNA splicing, via spliceosome	13	0.934579	0.0128144
response to ionizing radiation	9	0.647017	0.0132256
regulation of transcription from RNA polymerase II promoter	31	2.22861	0.0133232
protein autophosphorylation	19	1.36592	0.0137875
transcription, DNA-templated	59	4.24155	0.0146808
positive regulation of transforming growth factor beta receptor signaling pathway	5	0.359454	0.0155755
protein phosphorylation	17	1.22214	0.015651
DNA unwinding involved in DNA replication	4	0.287563	0.0185365
maintenance of DNA methylation	4	0.287563	0.0185365
regulation of attachment of spindle microtubules to kinetochore	4	0.287563	0.0185365
negative regulation of protein localization to nucleus	4	0.287563	0.0185365
mitotic spindle assembly	7	0.503235	0.0187073
RNA secondary structure unwinding	9	0.647017	0.0192642
positive regulation of protein ubiquitination	9	0.647017	0.0192642
intracellular signal transduction	37	2.65996	0.0208627
somatic stem cell population maintenance	8	0.575126	0.0237119
regulation of cell cycle	12	0.862689	0.0240623
positive regulation of cytokinesis	6	0.431344	0.0276241
centriole replication	4	0.287563	0.0299129
protein localization to kinetochore	4	0.287563	0.0299129
chromosome organization	5	0.359454	0.0309212
replication fork processing	5	0.359454	0.0309212
negative regulation of proteasomal ubiquitin-dependent protein catabolic process	5	0.359454	0.0309212
B cell apoptotic process	3	0.215672	0.0312629
double-strand break repair via break-induced replication	3	0.215672	0.0312629
negative regulation of DNA damage checkpoint	3	0.215672	0.0312629
DNA replication, removal of RNA primer	3	0.215672	0.0312629
cleavage involved in rRNA processing	3	0.215672	0.0312629
PML body organization	3	0.215672	0.0312629
protein autoubiquitination	9	0.647017	0.0316559
cilium assembly	15	1.07836	0.0331991
thymus development	8	0.575126	0.0338747
protein localization to nucleus	6	0.431344	0.0350068
stem cell population maintenance	9	0.647017	0.0367744
positive regulation of NF-kappaB transcription factor activity	12	0.862689	0.0388829
regulation of Rho protein signal transduction	11	0.790798	0.0389239
activation of GTPase activity	11	0.790798	0.0389239
mitotic spindle organization	5	0.359454	0.0410135
DNA replication-dependent nucleosome assembly	5	0.359454	0.0410135
negative regulation of cell proliferation	27	1.94105	0.0417388
forebrain development	7	0.503235	0.0424424
DNA duplex unwinding	6	0.431344	0.0434964
positive regulation of transcription, DNA-templated	30	2.15672	0.0441429
protein localization to pre-autophagosomal structure	4	0.287563	0.0441563
mesoderm development	4	0.287563	0.0441563
protein desumoylation	4	0.287563	0.0441563
regulation of mitotic nuclear division	4	0.287563	0.0441563
Significantly detected KEGG pathways based on up-regulated DEGs between oocyte and zygote (enrichment test P-value < 0.05)
KEGG term	# of genes	%	P-value
Cell cycle	37	2.65996	1.83066e-11
DNA replication	18	1.29403	1.98636e-10
Mismatch repair	11	0.790798	5.69043e-06
Ribosome biogenesis in eukaryotes	20	1.43781	1.06046e-05
Fanconi anemia pathway	15	1.07836	0.000133591
RNA transport	27	1.94105	0.000323386
Spliceosome	23	1.65349	0.00042343
Oocyte meiosis	19	1.36592	0.00185813
Regulation of actin cytoskeleton	30	2.15672	0.00365009
Dorso-ventral axis formation	8	0.575126	0.00388989
Base excision repair	9	0.647017	0.00432578
p53 signaling pathway	14	1.00647	0.00537452
Nucleotide excision repair	10	0.718907	0.00664504
ErbB signaling pathway	16	1.15025	0.00699637
RNA degradation	14	1.00647	0.00935174
Notch signaling pathway	10	0.718907	0.0247693
Insulin signaling pathway	19	1.36592	0.0303754
Homologous recombination	7	0.503235	0.030636
Wnt signaling pathway	19	1.36592	0.0410012
Hedgehog signaling pathway	6	0.431344	0.0486246
