# Supplementary material for: Zygotic gene activation in the chicken occurs in two waves, the first involving only maternally derived genes
Source: eLife journal article supplement (doi:10.7554/elife.39381), 2018-10-30
Supplement: supp [file elife-39381-supp-v1.zip › elife_poa_e39381_Supplementary_File_5.xlsx]

## Sheet: Supplementary file 5A
Supplementary file 5A. Detected SNPs on each chromosome from the WGS data
Chr.	Length	Variants	Chr.	Length	Variants
1	195276750	2109432	17	10454150	111208
2	148809762	1601156	18	11219875	117511
3	110447801	1199589	19	9983394	104435
4	90216835	1003785	20	14302601	148040
5	59580361	633183	21	6802778	76256
6	34951654	450107	22	4081097	23779
7	36245040	414100	23	5723239	63649
8	28767244	310967	24	6323281	73649
9	23441680	285875	25	2191139	16869
10	19911089	224814	26	5329985	60495
11	19401079	199959	27	5209285	51527
12	19897011	236818	28	4742627	47640
13	17760035	200916	W	1248174	65
14	15161805	167141	Z	82363669	471462
15	12656803	121225	Total	1003035513	10529469
16	535270	3817

## Sheet: Supplementary file 5B
Supplementary file 5B. Quality information for detected SNPs in WGS data
Chr	Pos	Rs_id	ID	KM4	KM6	KM7	WF13	WF6	WF7
1	923978	rs15013077	1:923978	0/0:21,0:21:42:0,42,443	0/0:23,0:23:39:0,39,389	0/0:17,0:19:33:0,33,329	1/1:0,29:29:72:763,72,0	1/1:0,41:43:99:1044,99,0	1/1:0,35:36:90:966,90,0
1	924775	rs15743147	1:924775	1/1:0,34:36:78:814,78,0	1/1:0,35:35:96:973,96,0	1/1:0,21:21:51:490,51,0	0/0:22,0:22:66:0,66,633	0/0:27,0:27:69:0,69,743	0/0:33,0:33:93:0,93,936
1	974982	rs15743250	1:974982	1/1:0,31:31:75:797,75,0	1/1:0,25:26:60:604,60,0	1/1:0,39:39:96:1011,96,0	0/0:38,0:38:87:0,87,804	0/0:46,0:46:99:0,102,950	0/0:38,0:38:93:0,93,866
1	991573	.	1:991573	1/1:4,21:25:54:541,54,0	1/1:1,20:21:36:362,36,0	1/1:2,20:22:42:448,42,0	0/0:32,0:33:84:0,84,861	0/0:26,0:26:75:0,75,760	0/0:36,0:36:93:0,93,942
1	991890	rs318057844	1:991890	0/0:36,0:36:84:0,84,870	0/0:28,0:28:69:0,69,709	0/0:21,0:21:54:0,54,575	1/1:0,41:42:99:1051,102,0	1/1:0,33:35:81:829,81,0	1/1:0,34:34:90:936,90,0
1	6083503	rs740772166	1:6083503	0/0:30,0:30:75:0,75,686	0/0:37,0:37:78:0,78,724	0/0:31,0:32:69:0,69,653	1/1:0,33:33:84:926,84,0	1/1:0,35:35:99:1087,99,0	1/1:0,39:39:99:1183,111,0
1	6084661	rs739772154	1:6084661	0/0:26,0:26:63:0,63,654	0/0:33,0:33:87:0,87,898	0/0:24,0:25:51:0,51,538	1/1:0,40:41:99:1110,111,0	1/1:0,40:40:99:995,102,0	1/1:0,45:46:99:1173,120,0
1	6176912	rs317517219	1:6176912	0/0:18,0:18:12:0,12,104	0/0:11,0:12:15:0,15,126	0/0:9,0:9:12:0,12,101	1/1:0,26:26:30:290,30,0	1/1:0,14:14:30:320,30,0	1/1:0,13:13:9:99,9,0
1	6180393	rs80737283	1:6180393	1/1:0,31:31:84:837,84,0	1/1:0,27:27:63:671,63,0	1/1:0,35:36:75:811,75,0	0/0:42,0:42:99:0,111,1098	0/0:42,0:42:99:0,117,1174	0/0:36,0:37:93:0,93,905
1	6182857	rs312487289	1:6182857	0/0:35,0:35:93:0,93,911	0/0:29,0:30:75:0,75,746	0/0:36,0:36:78:0,78,801	1/1:0,31:32:87:918,87,0	1/1:0,41:42:93:1015,93,0	1/1:1,32:33:75:838,75,0
1	33605869	rs13848549	1:33605869	1/1:0,33:33:75:806,75,0	1/1:0,35:35:93:968,93,0	1/1:0,32:32:84:873,84,0	0/0:40,0:40:99:0,105,1010	0/0:52,0:52:99:0,132,1321	0/0:40,0:40:99:0,102,985
1	33620467	rs313651917	1:33620467	1/1:0,43:45:96:974,96,0	1/1:0,27:27:69:719,69,0	1/1:0,38:38:96:992,96,0	0/0:29,0:29:84:0,84,774	0/0:50,0:50:99:0,126,1211	0/0:32,0:32:84:0,84,792
1	38216694	rs13853716	1:38216694	0/0:21,0:21:39:0,39,369	0/0:25,0:25:54:0,54,539	0/0:29,0:29:66:0,66,615	1/1:0,32:32:84:922,84,0	1/1:0,44:46:99:1321,123,0	1/1:0,33:34:90:953,90,0
1	38217360	rs13752189	1:38217360	1/1:0,48:48:99:1215,123,0	1/1:0,37:37:78:808,78,0	1/1:0,37:38:87:886,87,0	0/0:45,0:45:99:0,117,1261	0/0:41,0:41:99:0,114,1206	0/0:43,0:43:99:0,120,1295
1	38217551	rs13752190	1:38217551	1/1:0,30:30:63:639,63,0	1/1:0,28:29:69:730,69,0	1/1:0,39:39:90:907,90,0	0/0:40,0:40:99:0,114,1248	0/0:46,0:47:99:0,105,1112	0/0:43,0:43:99:0,111,1217
1	38217630	rs13752191	1:38217630	1/1:0,37:37:96:990,96,0	1/1:0,26:26:63:638,63,0	1/1:0,35:35:93:1000,93,0	0/0:37,0:37:99:0,102,1138	0/0:44,0:44:99:0,120,1311	0/0:34,0:34:93:0,93,987
1	38217840	rs317959149	1:38217840	0/0:43,0:46:99:0,102,1076	0/0:28,0:28:78:0,78,781	0/0:30,0:34:78:0,78,819	1/1:0,40:40:99:1144,108,0	1/1:0,49:50:99:1229,114,0	1/1:0,42:43:99:1247,117,0
1	38218269	rs312824916	1:38218269	0/0:32,0:32:75:0,75,788	0/0:16,0:16:45:0,45,463	0/0:37,0:38:84:0,84,859	1/1:0,33:33:84:882,84,0	1/1:0,43:44:99:1077,102,0	1/1:0,49:49:99:1247,117,0
1	38220153	rs739773682	1:38220153	0/0:33,0:33:84:0,84,824	0/0:23,0:23:51:0,51,501	0/0:32,0:32:81:0,81,772	1/1:0,35:36:87:903,87,0	1/1:0,30:30:75:794,75,0	1/1:0,26:26:63:679,63,0
1	38221875	rs13853732	1:38221875	1/1:0,37:37:93:936,93,0	1/1:0,33:34:81:829,81,0	1/1:0,31:32:66:682,66,0	0/0:28,0:28:60:0,60,562	0/0:26,0:26:69:0,69,702	0/0:34,0:35:93:0,93,858
1	38222677	rs312792426	1:38222677	0/0:27,0:29:60:0,60,538	0/0:21,0:21:36:0,36,337	0/0:32,0:32:81:0,81,765	1/1:0,38:38:99:1091,102,0	1/1:0,31:31:75:792,75,0	1/1:0,29:29:63:695,63,0
1	38222932	rs315589852	1:38222932	0/0:25,0:26:51:0,51,548	0/0:19,0:22:45:0,45,439	0/0:33,0:33:78:0,78,808	1/1:0,40:41:93:956,93,0	1/1:0,28:28:78:809,78,0	1/1:0,18:18:51:528,51,0
1	38222953	rs313236582	1:38222953	0/0:26,0:26:60:0,60,632	0/0:20,0:22:39:0,39,386	0/0:41,0:41:84:0,84,871	1/1:0,42:42:96:1024,96,0	1/1:0,34:34:90:941,90,0	1/1:0,24:24:54:543,54,0
1	38229784	rs316650440	1:38229784	0/0:24,0:24:66:0,66,695	0/0:33,0:33:81:0,81,846	0/0:48,0:48:99:0,132,1358	1/1:0,30:30:78:762,78,0	1/1:0,44:44:99:1140,114,0	1/1:0,22:22:60:595,60,0
1	40046434	.	1:40046434	0/0:40,1:44:75:0,75,984	0/0:33,0:36:66:0,66,697	0/0:23,0:23:57:0,57,550	1/1:0,36:36:75:722,75,0	1/1:0,40:40:96:913,96,0	1/1:0,28:28:63:630,63,0
1	40082277	rs312981720	1:40082277	0/0:36,0:36:87:0,87,914	0/0:22,0:23:60:0,60,607	0/0:32,0:32:78:0,78,793	1/1:0,40:40:99:1147,108,0	1/1:0,34:34:96:1022,96,0	1/1:0,30:30:84:898,84,0
1	40123074	rs313727625	1:40123074	0/0:36,0:36:90:0,90,877	0/0:29,0:29:75:0,75,775	0/0:28,0:29:60:0,60,575	1/1:0,37:38:99:1111,102,0	1/1:0,43:43:99:1244,117,0	1/1:0,36:37:99:1094,102,0
1	45011065	rs14818043	1:45011065	1/1:0,26:26:69:713,69,0	1/1:0,33:35:72:701,72,0	1/1:0,33:35:78:791,78,0	0/0:47,0:48:99:0,126,1375	0/0:60,0:63:99:0,159,1668	0/0:43,0:43:99:0,108,1156
1	45011114	rs312642506	1:45011114	1/1:0,33:34:78:712,78,0	1/1:1,37:38:69:621,69,0	1/1:0,38:38:78:765,78,0	0/0:39,0:39:99:0,102,1096	0/0:48,0:48:99:0,138,1519	0/0:50,1:51:99:0,132,1442
1	45022515	rs13859555	1:45022515	1/1:0,35:35:90:880,90,0	1/1:0,32:32:81:820,81,0	1/1:0,33:33:72:765,72,0	0/0:39,0:40:99:0,111,1186	0/0:50,0:51:99:0,132,1425	0/0:42,0:42:99:0,120,1278
1	45024236	rs313140732	1:45024236	1/1:0,37:38:96:993,96,0	1/1:0,20:20:45:477,45,0	1/1:0,33:35:90:903,90,0	0/0:41,0:44:99:0,99,1042	0/0:34,0:37:81:0,81,842	0/0:40,0:40:90:0,90,958
1	47508501	rs737230644	1:47508501	1/1:0,35:36:69:741,69,0	1/1:2,21:24:48:493,48,0	1/1:0,30:31:84:879,84,0	0/0:36,0:36:96:0,96,1024	0/0:33,0:35:87:0,87,925	0/0:38,0:39:96:0,96,1048
1	47510150	rs15257557	1:47510150	0/0:29,0:31:81:0,81,829	0/0:33,0:33:84:0,84,859	0/0:23,0:23:60:0,60,601	1/1:0,34:35:84:876,84,0	1/1:0,37:37:93:1000,93,0	1/1:0,34:35:87:947,87,0
1	47514813	rs739950245	1:47514813	1/1:0,42:42:99:965,105,0	1/1:0,21:22:48:455,48,0	1/1:2,32:34:63:586,63,0	0/0:34,0:34:93:0,93,1014	0/0:51,0:51:99:0,138,1529	0/0:42,0:42:99:0,117,1285
1	47530544	rs315274545	1:47530544	1/1:0,31:31:87:887,87,0	1/1:0,28:28:78:775,78,0	1/1:0,31:32:72:754,72,0	0/0:30,0:30:84:0,84,868	0/0:40,0:41:99:0,102,1095	0/0:42,0:42:99:0,114,1200
1	47530569	rs312264183	1:47530569	1/1:0,29:30:72:706,72,0	1/1:0,26:27:60:577,60,0	1/1:0,28:28:69:660,69,0	0/0:31,0:31:78:0,78,848	0/0:40,0:40:99:0,102,1114	0/0:41,0:42:99:0,111,1225
1	47531964	rs738728023	1:47531964	1/1:0,21:21:42:367,42,0	1/1:0,26:26:54:521,54,0	1/1:0,27:28:54:517,54,0	0/0:37,0:37:99:0,102,1127	0/0:43,0:44:99:0,114,1236	0/0:36,0:38:99:0,102,1129
1	47546736	rs316104787	1:47546736	0/0:42,0:42:96:0,96,962	0/0:29,0:29:69:0,69,717	0/0:27,0:28:57:0,57,592	1/1:0,35:36:87:877,87,0	1/1:0,54:54:99:1558,144,0	1/1:0,36:38:90:942,90,0
1	47552395	rs734538828	1:47552395	1/1:0,35:35:72:742,72,0	1/1:0,23:23:48:518,48,0	1/1:0,22:26:57:578,57,0	0/0:40,0:41:99:0,111,1172	0/0:47,0:48:99:0,132,1404	0/0:28,0:28:78:0,78,856
1	47559510	rs15257706	1:47559510	1/1:0,26:26:60:532,60,0	1/1:0,24:24:45:396,45,0	1/1:0,29:30:63:576,63,0	0/0:37,0:37:99:0,105,1125	0/0:35,0:36:99:0,105,1150	0/0:26,0:26:72:0,72,798
1	57580662	rs735741254	1:57580662	0/0:33,1:36:81:0,81,805	0/0:32,0:32:69:0,69,646	0/0:27,0:27:60:0,60,566	1/1:0,25:26:66:682,66,0	1/1:0,44:44:99:1236,117,0	1/1:0,29:30:57:591,57,0
1	57580664	rs736603280	1:57580664	0/0:38,0:38:87:0,87,835	0/0:31,0:32:63:0,63,576	0/0:27,0:27:57:0,57,534	1/1:0,24:24:69:730,69,0	1/1:0,43:43:99:1208,111,0	1/1:0,30:31:75:787,75,0
1	57580712	rs733225304	1:57580712	0/0:41,0:42:99:0,99,1023	0/0:32,0:32:81:0,81,825	0/0:23,0:23:54:0,54,519	1/1:0,25:25:69:691,69,0	1/1:0,40:40:99:1207,114,0	1/1:0,29:29:75:771,75,0
1	58393510	rs314463565	1:58393510	1/1:0,46:46:99:1241,120,0	1/1:0,32:32:78:812,78,0	1/1:0,41:42:90:973,90,0	0/0:42,0:44:99:0,123,1349	0/0:48,0:48:99:0,132,1416	0/0:46,0:46:99:0,123,1300
1	58393637	rs314761856	1:58393637	0/0:39,0:39:96:0,96,1006	0/0:33,0:34:84:0,84,870	0/0:32,1:33:57:0,57,792	1/1:0,32:32:72:704,72,0	1/1:0,51:51:99:1315,132,0	1/1:0,38:38:81:789,81,0
1	58394006	rs733568511	1:58394006	0/0:35,0:37:75:0,75,725	0/0:34,1:36:78:0,78,782	0/0:32,0:37:75:0,75,759	1/1:0,42:42:99:1098,102,0	1/1:0,49:49:99:1570,144,0	1/1:1,41:42:86:1206,86,0
1	58394194	rs734167910	1:58394194	0/0:36,1:37:70:0,70,915	0/0:37,0:38:84:0,84,872	0/0:23,0:23:60:0,60,605	1/1:0,43:43:99:1352,123,0	1/1:0,36:37:90:976,90,0	1/1:0,53:53:99:1628,153,0
1	60490888	rs314309191	1:60490888	1/1:0,21:21:45:433,45,0	1/1:0,27:27:66:674,66,0	1/1:0,30:30:69:712,69,0	0/0:30,0:30:87:0,87,929	0/0:42,0:42:99:0,114,1191	0/0:25,0:25:69:0,69,714
1	60492609	rs315561818	1:60492609	0/0:23,1:24:57:0,57,540	0/0:20,0:21:51:0,51,495	0/0:21,0:21:45:0,45,437	1/1:0,25:25:57:617,57,0	1/1:0,38:38:90:997,90,0	1/1:0,31:31:66:705,66,0
1	64134046	rs316151945	1:64134046	0/0:32,0:33:60:0,60,576	0/0:34,1:35:90:0,90,894	0/0:30,0:30:66:0,66,646	1/1:0,32:32:93:994,93,0	1/1:1,40:41:92:1212,92,0	1/1:0,34:34:90:944,90,0
1	64134147	rs316645476	1:64134147	0/0:37,0:37:96:0,96,1013	0/0:30,1:31:81:0,81,827	0/0:40,2:42:99:0,117,1211	1/1:0,39:40:93:1009,93,0	1/1:1,48:50:99:1412,132,0	1/1:1,36:37:78:1080,78,0
1	64168670	rs314891415	1:64168670	0/0:30,1:31:35:0,35,613	0/0:32,0:32:69:0,69,653	0/0:29,0:31:66:0,66,641	1/1:0,42:42:99:1217,114,0	1/1:0,33:33:90:1008,90,0	1/1:0,43:43:99:1355,126,0
1	64185048	rs317882900	1:64185048	0/0:45,0:45:99:0,126,1330	0/0:30,0:30:75:0,75,775	0/0:32,0:32:87:0,87,918	1/1:0,49:49:99:1346,129,0	1/1:0,47:47:99:1467,135,0	1/1:0,44:45:99:1191,111,0
1	68627843	rs315044274	1:68627843	0/0:31,0:32:75:0,75,781	0/0:17,0:17:36:0,36,377	0/0:26,0:27:60:0,60,633	1/1:0,34:37:78:836,78,0	1/1:0,52:52:99:1371,126,0	1/1:0,39:40:99:1062,99,0
1	68628335	rs313378720	1:68628335	0/0:33,0:33:87:0,87,904	0/0:29,0:29:66:0,66,691	0/0:35,0:35:93:0,93,984	1/1:0,31:31:78:830,78,0	1/1:0,35:35:96:1050,96,0	1/1:0,36:36:99:1116,102,0
1	68628446	rs14841650	1:68628446	0/0:38,0:40:87:0,87,871	0/0:33,0:34:78:0,78,798	0/0:27,1:28:60:0,60,622	1/1:0,43:44:99:1286,123,0	1/1:0,49:49:99:1468,135,0	1/1:0,42:42:99:1190,111,0
1	78502731	rs80751195	1:78502731	0/0:44,0:44:99:0,108,1096	0/0:36,0:37:75:0,75,754	0/0:36,0:36:72:0,72,711	1/1:0,39:40:99:1081,102,0	1/1:0,41:41:99:1090,102,0	1/1:0,41:41:99:1096,102,0
1	78511951	rs316689948	1:78511951	0/0:25,0:25:72:0,72,745	0/0:45,0:45:96:0,96,994	0/0:27,0:27:63:0,63,661	1/1:0,47:48:99:1480,135,0	1/1:0,30:30:87:968,87,0	1/1:0,34:34:90:969,90,0
1	79971111	rs317132980	1:79971111	0/0:36,0:36:99:0,102,1053	0/0:28,0:29:69:0,69,716	0/0:29,0:30:69:0,69,727	1/1:0,37:37:87:938,87,0	1/1:0,45:45:99:1190,111,0	1/1:0,44:44:99:1247,117,0
1	79971118	rs315682012	1:79971118	0/0:39,0:39:99:0,105,1097	0/0:28,0:29:69:0,69,735	0/0:30,0:30:75:0,75,784	1/1:0,36:36:87:984,87,0	1/1:0,44:44:99:1233,114,0	1/1:0,48:48:99:1439,135,0
1	79971148	rs313421569	1:79971148	0/0:40,0:40:99:0,108,1100	0/0:31,0:31:81:0,81,836	0/0:22,1:23:51:0,51,513	1/1:1,39:40:99:1116,105,0	1/1:1,44:45:99:1321,123,0	1/1:1,37:38:99:1187,108,0
1	80010738	rs735345053	1:80010738	0/0:26,0:26:60:0,60,610	0/0:31,0:31:81:0,81,833	0/0:26,0:26:72:0,72,754	1/1:0,43:43:99:1106,105,0	1/1:0,44:45:99:1295,123,0	1/1:0,31:31:87:929,87,0
1	80010833	rs313689739	1:80010833	1/1:0,35:35:84:864,84,0	1/1:0,31:31:84:901,84,0	1/1:0,29:29:75:796,75,0	0/0:51,0:51:99:0,141,1487	0/0:42,0:45:99:0,108,1194	0/0:24,0:24:69:0,69,742
1	80010838	rs317303504	1:80010838	1/1:0,37:37:87:909,87,0	1/1:0,32:32:87:950,87,0	1/1:0,30:30:78:796,78,0	0/0:51,0:51:99:0,135,1262	0/0:46,0:47:99:0,123,1166	0/0:24,0:24:63:0,63,603
1	80049320	rs317406418	1:80049320	0/0:25,0:27:51:0,51,550	0/0:24,0:24:60:0,60,638	0/0:32,0:33:84:0,84,895	1/1:0,32:32:90:975,90,0	1/1:0,39:40:99:1093,105,0	1/1:0,41:42:99:1196,117,0
1	80060456	rs14848372	1:80060456	0/0:29,0:30:66:0,66,608	0/0:18,0:18:42:0,42,402	0/0:33,0:33:75:0,75,666	1/1:0,32:32:84:934,84,0	1/1:0,40:40:99:1239,114,0	1/1:0,23:24:66:740,66,0
1	80062434	rs314352582	1:80062434	0/0:27,0:27:72:0,72,765	0/0:20,0:20:51:0,51,534	0/0:29,0:31:78:0,78,827	1/1:0,39:39:87:899,87,0	1/1:1,38:39:77:1004,77,0	1/1:0,41:42:99:1047,108,0
1	80067014	rs315989627	1:80067014	0/0:31,0:31:87:0,87,918	0/0:25,0:25:72:0,72,749	0/0:35,0:36:75:0,75,762	1/1:1,29:30:72:691,72,0	1/1:0,39:39:99:1078,108,0	1/1:0,35:35:99:927,99,0
1	82681059	rs740575022	1:82681059	1/1:0,31:32:69:698,69,0	1/1:1,26:27:63:663,63,0	1/1:0,26:28:51:541,51,0	0/0:21,0:21:42:0,42,402	0/0:28,1:29:66:0,66,643	0/0:31,0:31:75:0,75,728
1	82688689	rs313287124	1:82688689	0/0:36,0:37:81:0,81,748	0/0:26,0:27:63:0,63,592	0/0:27,0:27:63:0,63,588	1/1:0,24:24:66:710,66,0	1/1:0,38:38:99:1067,99,0	1/1:0,33:33:87:945,87,0
1	83510854	rs15328654	1:83510854	0/0:35,0:36:72:0,72,787	0/0:33,0:36:84:0,84,907	0/0:37,0:38:93:0,93,961	1/1:1,34:36:81:777,81,0	1/1:0,48:48:99:1151,117,0	1/1:0,34:34:84:787,84,0
1	83511175	rs736199167	1:83511175	0/0:38,0:38:72:0,72,700	0/0:39,0:39:87:0,87,856	0/0:26,1:27:48:0,48,442	1/1:0,29:29:78:830,78,0	1/1:0,33:33:99:1100,99,0	1/1:0,29:29:75:823,75,0
1	91188549	rs317253878	1:91188549	0/0:37,0:37:90:0,90,952	0/0:34,0:35:90:0,90,947	0/0:41,0:41:99:0,105,1112	1/1:0,33:33:93:1001,93,0	1/1:0,54:54:99:1583,147,0	1/1:0,43:43:99:1340,123,0
1	91189490	rs15346539	1:91189490	1/1:0,33:33:81:847,81,0	1/1:0,35:35:84:906,84,0	1/1:0,35:35:93:966,93,0	0/0:50,0:51:99:0,126,1217	0/0:40,0:40:99:0,108,1074	0/0:40,0:40:99:0,102,1017
1	91189856	rs313090144	1:91189856	0/0:33,0:33:57:0,57,530	0/0:38,0:40:78:0,78,735	0/0:39,0:43:99:0,99,875	1/1:0,54:54:99:1465,135,0	1/1:0,39:39:96:1028,96,0	1/1:0,48:50:99:1434,132,0
1	91195013	rs313611067	1:91195013	0/0:36,0:37:69:0,69,655	0/0:29,0:30:51:0,51,469	0/0:24,0:25:42:0,42,403	1/1:0,30:30:81:875,81,0	1/1:0,35:35:90:986,90,0	1/1:0,38:40:99:1134,105,0
1	97411572	rs315818308	1:97411572	1/1:0,39:40:81:753,81,0	1/1:0,27:27:66:640,66,0	1/1:0,34:36:75:717,75,0	0/0:26,0:26:69:0,69,717	0/0:48,0:48:99:0,120,1306	0/0:43,0:44:99:0,114,1211
1	97411907	rs13688161	1:97411907	0/0:35,0:35:78:0,78,811	0/0:33,0:34:69:0,69,701	0/0:36,0:36:75:0,75,771	1/1:0,38:38:99:1068,99,0	1/1:0,48:49:99:1406,129,0	1/1:0,47:47:99:1296,120,0
1	107374854	rs737702060	1:107374854	1/1:0,40:40:99:1007,99,0	1/1:0,39:39:99:1117,105,0	1/1:0,31:31:72:778,72,0	0/0:43,0:43:99:0,111,1184	0/0:51,1:52:90:0,90,1195	0/0:28,0:28:78:0,78,839
1	107374983	rs312466656	1:107374983	1/1:1,30:31:43:657,43,0	1/1:0,31:31:78:799,78,0	1/1:0,28:28:63:666,63,0	0/0:40,0:40:99:0,108,1160	0/0:43,0:44:99:0,114,1242	0/0:42,0:44:99:0,111,1177
1	107375011	rs734645353	1:107375011	1/1:0,30:30:66:682,66,0	1/1:1,32:33:84:884,84,0	1/1:0,30:30:81:809,81,0	0/0:45,0:45:99:0,123,1297	0/0:46,1:47:99:0,129,1377	0/0:44,0:44:99:0,114,1237
1	107375138	rs317094938	1:107375138	1/1:0,33:33:93:959,93,0	1/1:0,26:26:63:629,63,0	1/1:0,38:40:78:767,78,0	0/0:32,0:33:75:0,75,806	0/0:52,0:52:99:0,138,1486	0/0:37,0:37:99:0,99,1053
1	107375143	rs10730720	1:107375143	1/1:1,33:34:54:807,54,0	1/1:0,24:24:60:621,60,0	1/1:0,38:38:90:940,90,0	0/0:36,0:36:96:0,96,1019	0/0:52,0:52:99:0,144,1592	0/0:35,0:36:96:0,96,1054
1	107375325	rs313695946	1:107375325	1/1:0,33:33:78:807,78,0	1/1:0,26:26:66:717,66,0	1/1:0,43:43:99:1095,105,0	0/0:47,0:47:99:0,123,1296	0/0:54,0:54:99:0,150,1636	0/0:34,0:34:93:0,93,1010
1	107375537	rs313159361	1:107375537	1/1:0,30:30:84:836,84,0	1/1:1,29:32:78:839,78,0	1/1:0,33:34:84:869,84,0	0/0:45,0:45:99:0,111,1192	0/0:48,0:48:99:0,132,1404	0/0:38,0:38:99:0,108,1123
1	107385850	rs14871477	1:107385850	1/1:0,32:32:75:768,75,0	1/1:0,26:26:63:655,63,0	1/1:1,46:47:69:871,69,0	0/0:44,0:46:99:0,114,1209	0/0:41,0:41:93:0,93,1036	0/0:39,0:40:99:0,108,1173
1	107385865	rs14871478	1:107385865	1/1:0,30:30:69:664,69,0	1/1:0,26:26:60:568,60,0	1/1:0,41:42:72:651,72,0	0/0:48,0:48:99:0,126,1407	0/0:39,0:39:99:0,102,1131	0/0:37,0:38:90:0,90,986
1	107386264	rs15378009	1:107386264	1/1:0,40:40:93:941,93,0	1/1:0,30:31:81:840,81,0	1/1:0,31:34:66:668,66,0	0/0:37,0:39:90:0,90,973	0/0:51,0:52:99:0,132,1419	0/0:43,0:43:99:0,111,1194
1	122393000	rs317238805	1:122393000	1/1:0,31:31:69:705,69,0	1/1:0,33:33:78:775,78,0	1/1:0,29:32:72:721,72,0	0/0:32,0:33:81:0,81,857	0/0:41,0:41:99:0,108,1185	0/0:28,0:28:72:0,72,760
1	122393860	rs15411489	1:122393860	1/1:0,33:33:75:752,75,0	1/1:0,37:39:81:842,81,0	1/1:0,23:23:45:456,45,0	0/0:38,0:38:99:0,99,1052	0/0:36,0:36:84:0,84,903	0/0:38,0:38:96:0,96,1035
1	122396255	rs318179770	1:122396255	0/0:27,0:29:69:0,69,686	0/0:28,0:29:57:0,57,569	0/0:25,0:26:57:0,57,567	1/1:0,27:27:81:878,81,0	1/1:1,32:33:69:998,69,0	1/1:0,43:43:99:1173,108,0
1	122403017	rs317315962	1:122403017	0/0:28,0:30:69:0,69,678	0/0:25,1:27:66:0,66,708	0/0:28,0:30:66:0,66,676	1/1:0,29:30:69:703,69,0	1/1:0,41:41:96:1017,96,0	1/1:0,32:35:78:839,78,0
1	122409425	rs318197575	1:122409425	0/0:30,0:30:63:0,63,636	0/0:30,0:31:69:0,69,724	0/0:37,0:37:87:0,87,852	1/1:0,41:41:99:1212,111,0	1/1:0,39:39:99:1082,102,0	1/1:0,38:39:96:1031,96,0
1	128397044	rs314737931	1:128397044	0/0:24,0:26:54:0,54,463	0/0:28,0:28:72:0,72,697	0/0:26,0:27:66:0,66,629	1/1:0,36:36:90:980,90,0	1/1:0,36:36:96:1027,96,0	1/1:0,39:40:99:1174,108,0
1	128398190	rs317183097	1:128398190	0/0:37,0:37:81:0,81,819	0/0:23,0:24:63:0,63,645	0/0:36,0:37:90:0,90,982	1/1:0,38:39:99:1139,108,0	1/1:1,38:40:90:968,90,0	1/1:0,29:29:72:777,72,0
1	128398620	rs14886284	1:128398620	0/0:37,0:38:78:0,78,797	0/0:27,0:27:69:0,69,724	0/0:36,0:36:87:0,87,902	1/1:0,31:31:78:818,78,0	1/1:0,48:48:99:1202,114,0	1/1:0,40:41:96:1016,96,0
1	128403886	rs10726100	1:128403886	0/0:19,0:19:51:0,51,536	0/0:25,0:25:66:0,66,678	0/0:27,0:27:75:0,75,769	1/1:0,34:35:99:1039,99,0	1/1:1,37:38:80:1049,80,0	1/1:0,46:46:99:1342,123,0
1	128512170	rs735874809	1:128512170	0/0:29,0:29:66:0,66,691	0/0:20,0:20:42:0,42,425	0/0:28,2:31:69:0,69,713	1/1:1,38:39:99:1192,108,0	1/1:0,43:43:99:1185,108,0	1/1:0,36:36:99:1109,102,0
1	128512189	rs316791646	1:128512189	0/0:29,0:29:72:0,72,740	0/0:22,0:22:45:0,45,465	0/0:29,0:30:69:0,69,718	1/1:0,39:39:99:1142,108,0	1/1:1,41:42:99:1230,114,0	1/1:0,35:35:93:995,93,0
1	129304889	rs314852122	1:129304889	1/1:0,19:19:48:424,48,0	1/1:0,14:14:30:258,30,0	1/1:0,16:16:45:395,45,0	0/0:37,0:37:99:0,108,1198	0/0:28,0:28:75:0,75,839	0/0:31,0:31:84:0,84,895
1	129305063	rs317730840	1:129305063	1/1:0,27:27:72:755,72,0	1/1:0,31:32:63:614,63,0	1/1:0,26:26:66:652,66,0	0/0:29,0:29:75:0,75,837	0/0:23,0:23:66:0,66,721	0/0:23,0:23:60:0,60,647
1	129305254	rs315059412	1:129305254	1/1:0,40:40:99:1113,105,0	1/1:0,28:28:72:768,72,0	1/1:1,30:31:75:783,75,0	0/0:53,0:53:99:0,153,1612	0/0:40,0:40:99:0,114,1244	0/0:34,0:34:84:0,84,914
1	129305286	rs313387967	1:129305286	1/1:0,42:42:99:1025,99,0	1/1:0,24:25:57:597,57,0	1/1:0,30:30:60:615,60,0	0/0:52,0:52:99:0,138,1542	0/0:39,0:39:99:0,108,1182	0/0:33,0:34:84:0,84,915
1	142008803	rs10727990	1:142008803	0/0:45,0:45:99:0,111,1113	0/0:41,0:41:90:0,90,923	0/0:30,0:30:84:0,84,842	1/1:0,40:42:99:1301,120,0	1/1:0,36:37:99:1157,105,0	1/1:0,58:59:99:1893,171,0
1	142017516	rs316219741	1:142017516	0/0:33,0:34:96:0,96,985	0/0:29,0:29:81:0,81,865	0/0:27,0:28:69:0,69,706	1/1:0,34:34:87:843,87,0	1/1:0,39:41:96:962,96,0	1/1:0,37:37:90:853,90,0
1	143196823	rs13711972	1:143196823	0/0:33,0:33:75:0,75,787	0/0:20,0:20:51:0,51,506	0/0:29,0:31:66:0,66,676	1/1:0,35:36:75:795,75,0	1/1:0,46:47:99:1195,111,0	1/1:0,31:31:69:723,69,0
1	143196864	rs13711973	1:143196864	0/0:40,0:40:96:0,96,977	0/0:28,0:28:63:0,63,653	0/0:31,1:32:66:0,66,690	1/1:0,36:36:99:1142,105,0	1/1:0,47:47:99:1354,123,0	1/1:0,25:25:51:559,51,0
1	143196865	rs13711974	1:143196865	0/0:41,0:41:99:0,99,980	0/0:29,0:29:63:0,63,619	0/0:31,0:32:78:0,78,759	1/1:0,36:36:93:972,93,0	1/1:0,45:47:96:1031,96,0	1/1:0,23:25:54:556,54,0
1	143196883	rs14899022	1:143196883	0/0:41,0:41:87:0,87,907	0/0:29,0:29:66:0,66,679	0/0:34,0:34:81:0,81,838	1/1:0,36:37:99:1103,102,0	1/1:1,42:44:99:1129,105,0	1/1:0,26:27:54:566,54,0
1	143196884	rs15451372	1:143196884	0/0:41,0:41:99:0,108,1162	0/0:29,0:29:75:0,75,783	0/0:32,0:34:87:0,87,929	1/1:0,37:37:99:1109,105,0	1/1:0,43:43:99:1120,108,0	1/1:0,27:27:60:621,60,0
1	167631442	rs313134954	1:167631442	1/1:0,32:33:75:752,75,0	1/1:0,37:37:90:890,90,0	1/1:0,27:27:69:689,69,0	0/0:29,0:29:66:0,66,715	0/0:46,0:47:99:0,126,1328	0/0:34,0:34:84:0,84,883
1	167631445	rs317908093	1:167631445	1/1:0,31:31:72:690,72,0	1/1:0,35:36:66:628,66,0	1/1:0,28:28:63:598,63,0	0/0:30,0:30:81:0,81,877	0/0:47,0:47:99:0,129,1441	0/0:36,0:36:90:0,90,976
1	173785324	rs735306735	1:173785324	1/1:0,34:34:66:680,66,0	1/1:0,29:29:57:537,57,0	1/1:0,37:37:81:738,81,0	0/0:44,0:44:99:0,120,1255	0/0:50,0:50:99:0,132,1432	0/0:42,0:42:99:0,126,1355
1	173785795	rs314592906	1:173785795	1/1:0,29:29:78:752,78,0	1/1:1,36:37:87:846,87,0	1/1:0,24:24:54:526,54,0	0/0:44,0:44:99:0,120,1284	0/0:53,0:54:99:0,150,1602	0/0:42,0:42:99:0,111,1173
1	176362085	rs13980999	1:176362085	1/1:0,34:35:81:774,81,0	1/1:0,27:28:69:678,69,0	1/1:0,32:33:78:715,78,0	0/0:27,0:27:72:0,72,749	0/0:42,0:42:99:0,105,1136	0/0:44,0:44:99:0,117,1279
1	176362325	rs735111761	1:176362325	0/0:37,0:37:99:0,108,1149	0/0:33,0:33:93:0,93,972	0/0:29,0:29:75:0,75,786	1/1:0,45:46:99:1303,120,0	1/1:0,31:32:84:904,84,0	1/1:0,43:43:99:1103,102,0
1	177846219	rs732299779	1:177846219	1/1:0,24:25:72:766,72,0	1/1:0,40:40:90:971,90,0	1/1:0,36:36:81:843,81,0	0/0:39,0:39:99:0,108,1095	0/0:43,0:44:99:0,117,1140	0/0:34,0:34:84:0,84,837
1	177846356	rs15521566	1:177846356	1/1:0,37:39:84:776,84,0	1/1:0,39:40:66:588,66,0	1/1:0,41:41:99:932,99,0	0/0:39,0:40:99:0,111,1180	0/0:45,0:45:99:0,117,1220	0/0:44,0:44:99:0,108,1175
1	177849593	rs316601253	1:177849593	0/0:25,0:25:60:0,60,581	0/0:29,0:30:63:0,63,645	0/0:44,0:45:96:0,96,971	1/1:0,35:36:90:916,90,0	1/1:0,41:42:99:1249,114,0	1/1:0,44:45:99:1096,105,0
1	177850496	rs315137189	1:177850496	1/1:0,35:35:84:825,84,0	1/1:0,27:27:57:547,57,0	1/1:0,27:30:45:417,45,0	0/0:29,0:29:75:0,75,783	0/0:38,0:38:96:0,96,1014	0/0:39,0:39:99:0,108,1157
1	177851779	rs316653410	1:177851779	0/0:23,0:27:42:0,42,437	0/0:22,0:25:48:0,48,472	0/0:19,0:20:45:0,45,458	1/1:1,29:30:60:598,60,0	1/1:0,42:44:99:1130,111,0	1/1:0,35:35:84:826,84,0
1	177851883	rs314878191	1:177851883	1/1:0,25:25:45:403,45,0	1/1:0,27:30:54:477,54,0	1/1:0,18:19:36:331,36,0	0/0:34,0:34:84:0,84,891	0/0:43,0:43:99:0,120,1301	0/0:24,0:24:60:0,60,675
1	177851965	rs316921843	1:177851965	1/1:1,37:38:82:989,82,0	1/1:0,34:34:81:797,81,0	1/1:0,22:24:54:536,54,0	0/0:41,0:41:99:0,114,1224	0/0:46,0:46:99:0,108,1228	0/0:31,0:31:72:0,72,810
1	177852038	rs313968018	1:177852038	0/0:34,0:35:90:0,90,927	0/0:32,0:33:78:0,78,821	0/0:27,0:28:60:0,60,602	1/1:0,41:42:99:982,105,0	1/1:0,46:46:99:1056,114,0	1/1:0,26:27:60:589,60,0
1	177857773	rs731898911	1:177857773	1/1:0,47:47:99:1072,105,0	1/1:0,24:25:51:500,51,0	1/1:0,36:37:93:987,93,0	0/0:44,0:44:99:0,120,1152	0/0:52,0:53:99:0,138,1305	0/0:35,0:35:93:0,93,866
1	179509959	rs317752504	1:179509959	0/0:29,0:30:78:0,78,735	0/0:26,0:26:72:0,72,734	0/0:15,0:15:39:0,39,375	1/1:0,40:41:99:1204,111,0	1/1:0,40:40:87:934,87,0	1/1:0,39:40:93:998,93,0
1	179510115	rs314886380	1:179510115	0/0:35,0:35:75:0,75,687	0/0:33,0:34:75:0,75,743	0/0:29,0:29:66:0,66,607	1/1:0,38:38:99:1070,99,0	1/1:0,45:45:99:1251,117,0	1/1:0,35:35:93:995,93,0
1	179511225	rs316748171	1:179511225	0/0:45,0:45:99:0,111,1137	0/0:33,0:35:72:0,72,720	0/0:36,0:38:87:0,87,866	1/1:0,40:40:99:1170,108,0	1/1:0,48:49:99:1440,132,0	1/1:0,49:49:99:1532,144,0
1	179538911	rs315600243	1:179538911	1/1:0,29:29:81:835,81,0	1/1:0,38:38:93:910,93,0	1/1:0,27:28:63:655,63,0	0/0:36,0:36:99:0,108,1136	0/0:39,0:39:99:0,111,1179	0/0:30,0:30:90:0,90,993
2	486533	rs15052338	2:486533	0/0:26,0:27:63:0,63,645	0/0:40,0:40:99:0,108,1067	0/0:31,0:31:78:0,78,782	1/1:0,32:33:87:960,87,0	1/1:0,49:49:99:1428,129,0	1/1:0,36:36:99:1080,99,0
2	490034	rs15052343	2:490034	0/0:22,0:22:45:0,45,405	0/0:19,0:19:33:0,33,291	0/0:37,0:37:75:0,75,709	1/1:0,31:32:87:926,87,0	1/1:0,39:40:99:1138,108,0	1/1:0,24:25:66:700,66,0
2	490970	rs14126138	2:490970	0/0:31,0:33:78:0,78,806	0/0:18,0:18:45:0,45,456	0/0:33,0:33:78:0,78,798	1/1:0,30:30:63:582,63,0	1/1:0,27:27:66:648,66,0	1/1:0,26:27:66:629,66,0
2	499469	rs736563178	2:499469	0/0:19,0:20:39:0,39,366	0/0:13,0:14:33:0,33,319	0/0:19,0:20:30:0,30,298	1/1:0,23:24:63:672,63,0	1/1:0,24:24:48:503,48,0	1/1:0,19:20:51:528,51,0
2	499633	rs740507470	2:499633	0/0:26,0:26:42:0,42,360	0/0:25,0:25:27:0,27,255	0/0:27,0:28:54:0,54,460	1/1:0,25:27:57:607,57,0	1/1:0,29:29:75:813,75,0	1/1:0,32:33:69:718,69,0
2	501233	rs313952529	2:501233	1/1:2,22:24:54:548,54,0	1/1:0,32:32:78:759,78,0	1/1:0,31:31:72:740,72,0	0/0:32,1:33:63:0,63,590	0/0:33,0:33:78:0,78,755	0/0:28,0:30:72:0,72,723
2	8515000	rs737860772	2:8515000	0/0:36,0:36:93:0,93,915	0/0:27,0:27:66:0,66,653	0/0:34,0:34:75:0,75,753	1/1:0,40:40:93:862,93,0	1/1:0,50:50:99:1248,126,0	1/1:0,36:36:84:788,84,0
2	8515074	rs314044670	2:8515074	0/0:38,0:39:90:0,90,889	0/0:20,0:20:48:0,48,504	0/0:31,0:31:66:0,66,707	1/1:1,37:38:87:881,87,0	1/1:0,49:52:99:999,99,0	1/1:0,43:43:99:1101,105,0
2	8515083	rs312534804	2:8515083	0/0:38,0:39:81:0,81,817	0/0:21,0:21:51:0,51,534	0/0:30,0:30:87:0,87,911	1/1:1,34:37:55:788,55,0	1/1:0,48:48:99:1087,102,0	1/1:0,48:48:99:1201,114,0
2	8515225	rs735671391	2:8515225	0/0:33,0:33:66:0,66,638	0/0:28,0:28:72:0,72,661	0/0:35,0:35:72:0,72,656	1/1:0,45:46:99:1111,105,0	1/1:0,49:50:99:1117,105,0	1/1:0,30:32:60:641,60,0
2	8515375	rs313715466	2:8515375	0/0:43,2:45:81:0,81,822	0/0:34,0:34:63:0,63,640	0/0:29,2:31:45:0,45,457	1/1:0,42:42:99:1273,120,0	1/1:1,46:47:99:1407,132,0	1/1:0,39:39:99:1164,108,0
2	8516247	rs15883845	2:8516247	0/0:37,0:38:93:0,93,857	0/0:33,0:33:78:0,78,722	0/0:41,0:41:81:0,81,737	1/1:0,36:36:84:936,84,0	1/1:0,39:39:93:1019,93,0	1/1:0,42:42:99:1258,114,0
2	8516951	rs15883849	2:8516951	0/0:30,0:31:72:0,72,711	0/0:33,0:33:81:0,81,818	0/0:34,0:35:96:0,96,987	1/1:0,41:41:99:1169,111,0	1/1:0,30:30:72:784,72,0	1/1:0,25:25:69:739,69,0
2	8517005	rs15883851	2:8517005	0/0:32,0:32:57:0,57,548	0/0:32,0:34:60:0,60,554	0/0:28,0:28:60:0,60,540	1/1:0,41:41:99:1266,117,0	1/1:1,29:30:75:828,75,0	1/1:0,26:27:72:785,72,0
2	17803011	rs735775908	2:17803011	0/0:28,0:28:75:0,75,740	0/0:26,0:27:75:0,75,778	0/0:23,0:23:54:0,54,555	1/1:0,26:26:63:681,63,0	1/1:0,32:32:90:984,90,0	1/1:0,18:18:48:521,48,0
2	17857893	rs739828334	2:17857893	0/0:34,0:34:93:0,93,961	0/0:28,0:28:78:0,78,813	0/0:25,0:25:66:0,66,715	1/1:0,31:31:87:947,87,0	1/1:0,39:39:99:1176,108,0	1/1:0,34:34:93:992,93,0
2	20433668	rs316507126	2:20433668	0/0:27,0:27:75:0,75,780	0/0:26,0:27:69:0,69,721	0/0:32,0:33:75:0,75,772	1/1:0,34:34:78:809,78,0	1/1:0,36:37:87:975,87,0	1/1:0,33:34:84:886,84,0
2	20452110	rs313232826	2:20452110	0/0:31,0:33:78:0,78,815	0/0:31,0:31:72:0,72,729	0/0:31,0:31:78:0,78,808	1/1:0,28:28:72:744,72,0	1/1:0,36:37:84:887,84,0	1/1:0,34:34:87:917,87,0
2	20535921	rs733952493	2:20535921	0/0:35,0:37:96:0,96,1006	0/0:22,0:22:57:0,57,566	0/0:25,0:26:69:0,69,734	1/1:0,33:33:84:894,84,0	1/1:0,38:39:99:1081,99,0	1/1:0,44:45:99:1202,111,0
2	20545968	rs733538660	2:20545968	0/0:34,0:35:81:0,81,769	0/0:31,0:31:81:0,81,809	0/0:33,0:34:69:0,69,664	1/1:0,44:44:99:965,99,0	1/1:0,43:43:93:896,93,0	1/1:0,53:53:96:923,96,0
2	40924131	rs732781420	2:40924131	0/0:39,0:40:84:0,84,763	0/0:33,0:33:75:0,75,693	0/0:46,0:46:84:0,84,750	1/1:0,36:36:84:923,84,0	1/1:0,42:42:99:1297,117,0	1/1:0,48:48:99:1487,132,0
2	40924302	rs736152548	2:40924302	0/0:39,0:40:93:0,93,992	0/0:27,0:27:57:0,57,596	0/0:36,1:37:58:0,58,930	1/1:0,28:30:72:755,72,0	1/1:0,37:37:96:1009,96,0	1/1:0,49:50:99:1428,135,0
2	40924644	rs740492717	2:40924644	1/1:0,25:25:48:511,48,0	1/1:0,27:27:72:688,72,0	1/1:0,22:24:48:490,48,0	0/0:30,0:30:78:0,78,849	0/0:37,0:38:99:0,99,1044	0/0:44,0:45:99:0,114,1176
2	40924649	rs733004740	2:40924649	1/1:0,27:27:60:624,60,0	1/1:0,23:23:63:651,63,0	1/1:0,22:23:57:574,57,0	0/0:29,0:30:69:0,69,738	0/0:36,0:37:99:0,102,1070	0/0:45,0:46:99:0,120,1268
2	40924690	rs15087928	2:40924690	0/0:29,0:29:66:0,66,686	0/0:23,0:23:57:0,57,606	0/0:22,1:23:57:0,57,602	1/1:0,29:29:75:814,75,0	1/1:0,39:40:96:1041,96,0	1/1:1,37:39:99:1133,105,0
2	40925264	rs312318215	2:40925264	0/0:29,0:29:75:0,75,717	0/0:43,0:44:99:0,108,1106	0/0:41,0:41:99:0,99,1038	1/1:0,37:37:99:1021,99,0	1/1:0,39:39:96:997,96,0	1/1:0,36:36:96:988,96,0
2	41008045	rs317075122	2:41008045	0/0:34,1:36:96:0,96,1008	0/0:34,0:34:90:0,90,932	0/0:40,0:40:99:0,108,1168	1/1:0,24:25:66:701,66,0	1/1:0,40:40:99:1184,108,0	1/1:0,32:32:81:845,81,0
2	41009089	rs15088026	2:41009089	0/0:43,0:43:99:0,114,1212	0/0:32,0:32:78:0,78,836	0/0:34,0:34:87:0,87,933	1/1:1,58:59:99:1681,140,0	1/1:0,45:46:99:1169,111,0	1/1:0,34:37:84:899,84,0
2	41010002	rs317568487	2:41010002	0/0:26,0:26:60:0,60,599	0/0:20,0:21:54:0,54,532	0/0:25,0:25:63:0,63,648	1/1:0,22:22:63:665,63,0	1/1:0,29:30:75:798,75,0	1/1:0,26:26:63:664,63,0
2	41010013	rs739672458	2:41010013	0/0:26,0:26:66:0,66,641	0/0:22,1:23:48:0,48,475	0/0:25,0:25:57:0,57,573	1/1:0,23:23:69:733,69,0	1/1:1,28:29:69:726,69,0	1/1:0,28:28:81:884,81,0
2	41603611	rs314576567	2:41603611	1/1:0,36:38:93:991,93,0	1/1:0,22:23:57:592,57,0	1/1:0,33:33:81:851,81,0	0/0:45,0:45:99:0,111,1078	0/0:38,0:38:99:0,102,971	0/0:26,0:27:69:0,69,651
2	41611248	rs314236768	2:41611248	1/1:1,27:31:63:645,63,0	1/1:0,34:34:90:954,90,0	1/1:0,25:25:72:753,72,0	0/0:40,0:40:99:0,102,1129	0/0:37,0:38:99:0,99,1061	0/0:42,0:42:99:0,120,1264
2	42464135	rs15089830	2:42464135	0/0:29,0:29:66:0,66,662	0/0:24,1:27:48:0,48,515	0/0:23,0:24:51:0,51,555	1/1:1,34:35:84:898,84,0	1/1:0,41:41:99:1143,108,0	1/1:0,37:37:84:929,84,0
2	42464162	rs313028974	2:42464162	0/0:30,0:30:72:0,72,757	0/0:25,0:25:63:0,63,650	0/0:27,0:27:69:0,69,709	1/1:0,30:32:75:811,75,0	1/1:0,43:44:99:1348,123,0	1/1:1,40:41:99:1052,99,0
2	59505147	rs314254788	2:59505147	0/0:27,0:30:66:0,66,621	0/0:35,0:37:75:0,75,767	0/0:33,1:34:63:0,63,640	1/1:0,37:37:99:1158,108,0	1/1:0,60:60:99:1532,144,0	1/1:0,46:47:93:977,93,0
2	59505288	rs312710268	2:59505288	0/0:20,0:20:51:0,51,509	0/0:34,0:34:78:0,78,792	0/0:27,0:28:69:0,69,703	1/1:0,45:45:99:968,102,0	1/1:0,36:38:84:786,84,0	1/1:0,32:34:81:776,81,0
2	59505294	rs316423694	2:59505294	0/0:19,0:20:45:0,45,457	0/0:33,0:33:66:0,66,689	0/0:28,0:28:78:0,78,826	1/1:0,45:45:99:1320,123,0	1/1:0,38:38:99:1083,105,0	1/1:0,30:30:81:858,81,0
2	68353384	rs15114270	2:68353384	1/1:0,30:31:69:696,69,0	1/1:0,17:17:48:490,48,0	1/1:0,25:26:63:660,63,0	0/0:46,0:46:99:0,123,1176	0/0:50,0:50:99:0,132,1250	0/0:43,0:43:99:0,99,969
2	68354300	rs315192377	2:68354300	1/1:0,43:43:99:1151,108,0	1/1:0,29:29:69:747,69,0	1/1:0,37:40:96:1017,96,0	0/0:50,0:50:99:0,123,1159	0/0:46,0:46:99:0,114,1122	0/0:38,0:38:99:0,105,978
2	68446794	rs13710543	2:68446794	1/1:0,33:34:78:767,78,0	1/1:0,32:33:78:776,78,0	1/1:0,28:28:69:696,69,0	0/0:28,0:28:69:0,69,747	0/0:42,0:44:96:0,96,1073	0/0:22,0:24:54:0,54,584
2	68464129	rs16032574	2:68464129	1/1:0,37:38:78:766,78,0	1/1:0,32:32:84:854,84,0	1/1:0,32:32:69:680,69,0	0/0:39,0:39:99:0,102,1036	0/0:38,0:38:99:0,99,1015	0/0:44,0:46:99:0,114,1159
2	68476129	rs313484313	2:68476129	0/0:52,0:52:99:0,114,1095	0/0:35,0:36:63:0,63,612	0/0:32,0:32:78:0,78,742	1/1:0,43:43:99:1088,105,0	1/1:0,46:47:99:1337,120,0	1/1:0,36:36:90:978,90,0
2	69243971	rs315088760	2:69243971	1/1:0,48:48:99:1047,102,0	1/1:0,39:39:96:975,96,0	1/1:0,40:40:99:1154,111,0	0/0:32,0:32:90:0,90,961	0/0:45,0:45:99:0,129,1399	0/0:44,0:44:99:0,114,1246
2	69244001	rs14202744	2:69244001	1/1:0,41:41:99:1093,105,0	1/1:0,35:35:84:887,84,0	1/1:0,38:38:93:1037,93,0	0/0:34,0:34:90:0,90,979	0/0:43,0:43:99:0,114,1256	0/0:42,1:43:99:0,117,1334
2	69244105	rs313065594	2:69244105	0/0:29,1:30:81:0,81,845	0/0:27,0:28:75:0,75,786	0/0:31,1:32:87:0,87,870	1/1:0,41:41:99:1102,114,0	1/1:0,48:48:99:1253,129,0	1/1:0,37:37:90:835,90,0
2	69244110	rs314926214	2:69244110	0/0:30,0:30:84:0,84,858	0/0:26,0:27:69:0,69,717	0/0:28,0:29:66:0,66,662	1/1:0,41:41:99:1197,114,0	1/1:0,48:48:99:1352,126,0	1/1:0,38:38:93:1010,93,0
2	78251481	rs10730804	2:78251481	0/0:28,0:28:78:0,78,795	0/0:28,0:28:75:0,75,744	0/0:39,0:39:99:0,99,966	1/1:0,27:27:72:776,72,0	1/1:0,35:35:84:930,84,0	1/1:0,30:30:72:767,72,0
2	78251550	rs739011978	2:78251550	0/0:31,0:31:78:0,78,824	0/0:27,0:28:66:0,66,697	0/0:36,0:37:84:0,84,879	1/1:0,32:32:72:731,72,0	1/1:0,32:33:75:725,75,0	1/1:0,37:37:90:933,90,0
2	78252219	rs14207626	2:78252219	0/0:27,0:27:75:0,75,790	0/0:19,0:19:48:0,48,523	0/0:36,0:36:99:0,102,1088	1/1:0,31:31:75:833,75,0	1/1:1,33:34:93:1042,93,0	1/1:0,34:34:78:859,78,0
2	79178542	rs314355276	2:79178542	1/1:0,29:29:72:688,72,0	1/1:0,20:20:39:367,39,0	1/1:0,31:32:78:746,78,0	0/0:36,0:36:99:0,102,1120	0/0:35,0:35:93:0,93,1014	0/0:38,0:38:96:0,96,1054
2	79182220	rs734554341	2:79182220	0/0:26,0:26:60:0,60,583	0/0:37,0:37:93:0,93,902	0/0:33,0:33:69:0,69,685	1/1:0,24:26:54:569,54,0	1/1:0,39:43:99:1177,108,0	1/1:1,42:43:87:896,87,0
2	79732899	rs316720716	2:79732899	1/1:0,30:31:75:785,75,0	1/1:0,35:37:99:1053,99,0	1/1:0,34:34:87:897,87,0	0/0:29,0:30:78:0,78,837	0/0:46,0:48:99:0,111,1165	0/0:43,0:43:99:0,117,1244
2	79735419	rs316691790	2:79735419	0/0:31,0:32:84:0,84,838	0/0:35,0:36:96:0,96,981	0/0:34,0:34:78:0,78,845	1/1:0,40:40:99:957,102,0	1/1:0,36:36:81:797,81,0	1/1:0,42:42:99:1079,111,0
2	89706657	rs312273274	2:89706657	1/1:0,28:28:66:683,66,0	1/1:0,24:26:63:669,63,0	1/1:0,23:23:60:616,60,0	0/0:24,0:24:57:0,57,562	0/0:36,0:36:96:0,96,937	0/0:33,0:33:84:0,84,871
2	89706803	rs10722181	2:89706803	0/0:23,0:24:69:0,69,715	0/0:28,0:29:75:0,75,775	0/0:26,0:26:66:0,66,691	1/1:0,31:31:72:812,72,0	1/1:0,33:33:81:887,81,0	1/1:0,34:35:78:815,78,0
2	89706804	rs10729569	2:89706804	0/0:25,0:25:57:0,57,598	0/0:28,0:29:69:0,69,710	0/0:26,0:26:66:0,66,677	1/1:0,31:31:72:781,72,0	1/1:0,33:33:81:869,81,0	1/1:0,35:37:81:839,81,0
2	89707206	rs10730245	2:89707206	0/0:23,0:24:57:0,57,520	0/0:23,0:23:51:0,51,459	0/0:28,0:28:63:0,63,584	1/1:0,33:33:96:984,96,0	1/1:0,39:39:96:963,96,0	1/1:0,30:31:81:831,81,0
2	89707207	rs10723400	2:89707207	0/0:23,0:23:54:0,54,516	0/0:23,0:23:60:0,60,543	0/0:27,0:28:66:0,66,585	1/1:0,34:34:87:889,87,0	1/1:0,39:39:87:894,87,0	1/1:0,30:30:72:737,72,0
2	89707311	rs315242739	2:89707311	0/0:35,0:35:75:0,75,813	0/0:21,0:21:60:0,60,641	0/0:32,0:33:78:0,78,789	1/1:0,42:43:90:920,90,0	1/1:0,34:37:81:782,81,0	1/1:0,42:42:99:1014,102,0
2	89707617	rs312983521	2:89707617	0/0:38,0:38:90:0,90,923	0/0:26,0:26:69:0,69,718	0/0:27,0:27:75:0,75,746	1/1:0,27:27:66:637,66,0	1/1:0,50:50:99:1148,111,0	1/1:0,43:44:99:1031,102,0
2	89707650	rs739151498	2:89707650	0/0:41,0:41:99:0,105,1136	0/0:21,1:22:63:0,63,678	0/0:23,0:23:57:0,57,552	1/1:0,29:29:69:663,69,0	1/1:0,44:45:99:995,99,0	1/1:0,45:47:99:1019,102,0
2	89707791	rs733287438	2:89707791	0/0:27,1:29:72:0,72,729	0/0:39,1:41:79:0,79,1046	0/0:36,1:37:75:0,75,744	1/1:0,34:34:84:829,84,0	1/1:0,43:43:99:1066,108,0	1/1:1,47:49:99:1072,108,0
2	89707888	rs740470464	2:89707888	0/0:36,0:37:81:0,81,845	0/0:38,0:38:99:0,99,1042	0/0:40,0:41:81:0,81,764	1/1:0,32:33:78:807,78,0	1/1:0,44:44:99:1076,108,0	1/1:0,33:34:78:800,78,0
2	89707953	rs316320263	2:89707953	0/0:36,0:37:72:0,72,766	0/0:32,0:32:78:0,78,829	0/0:38,0:38:96:0,96,972	1/1:0,39:39:99:1122,114,0	1/1:0,46:46:99:1284,126,0	1/1:0,41:41:99:1086,108,0
2	89708345	rs314632113	2:89708345	0/0:23,0:24:60:0,60,611	0/0:31,0:32:87:0,87,907	0/0:34,0:34:87:0,87,839	1/1:0,33:34:87:910,87,0	1/1:0,39:40:99:1087,102,0	1/1:0,32:32:87:869,87,0
2	89761091	rs318163377	2:89761091	1/1:0,27:27:39:368,39,0	1/1:0,37:37:81:721,81,0	1/1:0,34:35:66:612,66,0	0/0:39,0:41:99:0,105,1157	0/0:34,0:34:93:0,93,1031	0/0:35,0:35:87:0,87,914
2	89761100	rs737833495	2:89761100	1/1:0,27:27:63:645,63,0	1/1:0,36:36:87:905,87,0	1/1:0,32:34:87:899,87,0	0/0:45,0:46:99:0,120,1301	0/0:35,0:35:93:0,93,979	0/0:32,0:32:84:0,84,924
2	89935040	rs317307092	2:89935040	0/0:29,0:29:63:0,63,688	0/0:21,0:21:48:0,48,502	0/0:21,0:21:54:0,54,576	1/1:0,29:30:72:677,72,0	1/1:0,37:37:90:869,90,0	1/1:0,27:27:63:606,63,0
2	89935151	rs316420244	2:89935151	0/0:38,0:40:84:0,84,847	0/0:21,0:22:42:0,42,418	0/0:38,0:38:84:0,84,833	1/1:0,35:35:66:653,66,0	1/1:0,39:39:90:932,90,0	1/1:0,35:37:84:896,84,0
2	100527946	rs731266698	2:100527946	0/0:36,0:36:96:0,96,964	0/0:25,0:25:54:0,54,555	0/0:27,1:28:42:0,42,616	1/1:0,48:49:99:1418,132,0	1/1:0,40:41:99:1136,105,0	1/1:0,46:46:99:1353,123,0
2	100533280	rs735327118	2:100533280	0/0:27,1:33:60:0,60,602	0/0:29,0:32:39:0,39,378	0/0:28,0:32:45:0,45,447	1/1:0,32:32:84:827,84,0	1/1:0,38:38:87:851,87,0	1/1:0,35:35:81:780,81,0
2	100654080	.	2:100654080	0/0:23,0:23:57:0,57,611	0/0:17,0:17:42:0,42,422	0/0:21,0:21:51:0,51,531	1/1:0,21:21:33:327,33,0	1/1:0,18:18:36:374,36,0	1/1:0,22:23:51:499,51,0
2	100672225	rs316031739	2:100672225	0/0:43,0:44:87:0,87,773	0/0:32,0:32:63:0,63,574	0/0:32,0:32:75:0,75,680	1/1:0,40:40:96:1049,96,0	1/1:0,37:37:96:1024,96,0	1/1:0,37:37:96:1065,96,0
2	100682763	rs318147579	2:100682763	0/0:40,0:40:96:0,96,983	0/0:26,0:27:60:0,60,626	0/0:42,0:43:93:0,93,941	1/1:0,45:46:99:1189,111,0	1/1:0,58:58:99:1818,165,0	1/1:0,43:44:99:1236,114,0
2	100688259	rs312815967	2:100688259	0/0:40,0:40:99:0,102,1092	0/0:31,0:31:78:0,78,783	0/0:23,0:24:60:0,60,640	1/1:0,42:42:99:1135,105,0	1/1:0,49:49:99:1364,126,0	1/1:0,47:47:99:1217,117,0
2	100707550	rs732722573	2:100707550	0/0:27,1:28:66:0,66,633	0/0:23,1:24:39:0,39,384	0/0:31,0:32:75:0,75,739	1/1:0,21:21:51:549,51,0	1/1:4,43:47:76:1002,76,0	1/1:0,41:41:96:1029,96,0
2	100712422	rs315779443	2:100712422	0/0:44,0:46:93:0,93,837	0/0:31,0:31:72:0,72,659	0/0:40,0:40:75:0,75,697	1/1:0,25:25:57:576,57,0	1/1:0,44:44:99:1062,99,0	1/1:0,40:43:84:871,84,0
2	102095946	rs314014865	2:102095946	0/0:29,0:31:69:0,69,656	0/0:32,0:32:72:0,72,680	0/0:38,0:38:90:0,90,828	1/1:0,41:41:99:1228,117,0	1/1:0,43:44:99:1114,105,0	1/1:0,38:38:96:1057,96,0
2	102096196	rs312569361	2:102096196	1/1:0,20:20:57:575,57,0	1/1:0,22:22:48:487,48,0	1/1:0,22:22:66:667,66,0	0/0:38,0:39:96:0,96,978	0/0:27,0:27:72:0,72,734	0/0:32,0:33:75:0,75,766
2	102096380	rs317102766	2:102096380	1/1:1,24:27:31:570,31,0	1/1:1,32:34:46:736,46,0	1/1:0,30:31:63:678,63,0	0/0:27,0:28:72:0,72,739	0/0:31,0:32:87:0,87,912	0/0:37,0:37:93:0,93,949
2	102096419	rs315302113	2:102096419	1/1:0,29:29:69:741,69,0	1/1:0,34:35:75:768,75,0	1/1:0,29:30:66:654,66,0	0/0:28,0:28:75:0,75,773	0/0:36,0:37:99:0,108,1181	0/0:42,0:43:99:0,105,1139
2	102163026	rs315063514	2:102163026	0/0:36,0:36:96:0,96,988	0/0:33,0:33:90:0,90,926	0/0:29,0:29:66:0,66,643	1/1:0,42:42:99:1238,114,0	1/1:0,34:34:99:1121,99,0	1/1:1,42:43:99:1238,111,0
2	102164962	rs741099082	2:102164962	0/0:33,0:35:69:0,69,663	0/0:31,0:31:78:0,78,726	0/0:24,0:25:54:0,54,508	1/1:0,33:33:87:946,87,0	1/1:0,39:39:99:1166,105,0	1/1:0,26:27:75:836,75,0
2	102165364	rs738458956	2:102165364	0/0:31,0:32:75:0,75,794	0/0:23,0:23:45:0,45,458	0/0:42,0:42:99:0,111,1190	1/1:0,36:36:96:924,96,0	1/1:0,47:47:99:1264,126,0	1/1:0,22:22:54:531,54,0
2	102170359	rs738901305	2:102170359	0/0:32,0:33:75:0,75,714	0/0:26,0:26:54:0,54,489	0/0:20,0:22:36:0,36,345	1/1:0,37:37:81:870,81,0	1/1:0,42:43:99:1096,105,0	1/1:0,42:43:99:1055,99,0
2	102196369	rs313469472	2:102196369	0/0:38,0:38:96:0,96,888	0/0:21,0:21:30:0,30,261	0/0:29,0:29:48:0,48,431	1/1:0,35:35:93:1010,93,0	1/1:0,32:33:81:857,81,0	1/1:1,33:35:66:912,66,0
2	102199846	rs16085325	2:102199846	0/0:33,0:34:66:0,66,574	0/0:27,0:27:63:0,63,583	0/0:33,0:33:78:0,78,724	1/1:0,32:32:81:889,81,0	1/1:0,43:43:99:1343,123,0	1/1:0,45:45:99:1423,129,0
2	102200189	rs16085329	2:102200189	1/1:0,28:30:81:848,81,0	1/1:0,32:32:78:815,78,0	1/1:0,46:48:99:1158,111,0	0/0:42,0:42:99:0,117,1280	0/0:35,0:37:93:0,93,1029	0/0:31,0:31:78:0,78,841
2	102489928	rs738913056	2:102489928	0/0:31,0:32:63:0,63,576	0/0:19,0:19:30:0,30,278	0/0:30,0:33:66:0,66,592	1/1:0,35:38:93:983,93,0	1/1:0,45:45:99:1228,114,0	1/1:0,48:48:99:1321,123,0
2	102499602	rs794452683	2:102499602	0/0:33,0:35:75:0,75,772	0/0:25,0:25:63:0,63,641	0/0:37,0:38:84:0,84,888	1/1:0,43:43:99:1183,108,0	1/1:0,37:37:93:1018,93,0	1/1:0,47:49:99:1254,114,0
2	102499605	rs794296294	2:102499605	0/0:34,0:34:66:0,66,684	0/0:27,0:27:72:0,72,743	0/0:38,0:38:93:0,93,948	1/1:0,44:45:99:1202,111,0	1/1:0,38:38:99:1174,108,0	1/1:0,49:49:99:1380,126,0
2	102508816	rs313742707	2:102508816	0/0:27,0:27:54:0,54,584	0/0:23,0:24:57:0,57,597	0/0:22,0:24:51:0,51,525	1/1:0,35:35:99:1018,99,0	1/1:0,51:51:99:1339,129,0	1/1:0,38:38:87:927,87,0
2	102625706	rs740473073	2:102625706	0/0:25,0:26:72:0,72,730	0/0:32,0:33:72:0,72,738	0/0:38,0:38:81:0,81,846	1/1:0,26:27:69:750,69,0	1/1:1,36:37:93:998,93,0	1/1:1,30:31:78:878,78,0
2	102625840	rs312823377	2:102625840	1/1:0,37:37:72:689,72,0	1/1:0,34:35:69:657,69,0	1/1:0,20:21:42:399,42,0	0/0:34,0:35:84:0,84,904	0/0:41,0:41:93:0,93,995	0/0:31,0:32:78:0,78,829
2	102629894	rs10726151	2:102629894	0/0:43,0:44:99:0,99,911	0/0:30,0:31:51:0,51,460	0/0:25,0:25:60:0,60,565	1/1:0,43:43:99:1161,108,0	1/1:0,39:39:99:1190,111,0	1/1:0,35:35:99:1108,102,0
2	102685608	rs734149727	2:102685608	0/0:32,0:36:78:0,78,734	0/0:30,0:30:75:0,75,681	0/0:39,0:39:84:0,84,775	1/1:0,41:41:99:1298,117,0	1/1:0,52:52:99:1483,135,0	1/1:0,45:45:99:1362,126,0
2	102688595	rs318187827	2:102688595	0/0:33,0:34:87:0,87,850	0/0:32,0:32:69:0,69,659	0/0:31,0:31:78:0,78,753	1/1:0,36:37:96:1037,96,0	1/1:0,40:41:99:1204,114,0	1/1:0,39:39:99:1136,105,0
2	102689169	rs316039590	2:102689169	1/1:0,36:36:93:956,93,0	1/1:0,28:28:69:715,69,0	1/1:0,33:33:81:829,81,0	0/0:46,0:47:99:0,126,1381	0/0:30,0:30:81:0,81,867	0/0:45,0:45:99:0,129,1439
2	102690386	rs15136644	2:102690386	1/1:0,44:46:93:862,93,0	1/1:0,28:29:63:601,63,0	1/1:0,36:36:84:774,84,0	0/0:44,0:44:99:0,126,1354	0/0:48,0:49:99:0,132,1417	0/0:48,0:48:99:0,117,1283
2	102692430	rs312357527	2:102692430	0/0:30,0:30:69:0,69,722	0/0:29,0:29:57:0,57,569	0/0:21,0:21:48:0,48,470	1/1:0,31:32:81:832,81,0	1/1:0,44:44:99:1090,105,0	1/1:0,31:31:78:816,78,0
2	102692500	rs3137197	2:102692500	1/1:0,30:31:63:629,63,0	1/1:0,24:24:57:588,57,0	1/1:0,21:21:48:501,48,0	0/0:35,0:36:84:0,84,866	0/0:39,0:39:96:0,96,1002	0/0:38,0:38:90:0,90,955
2	102692541	rs312706299	2:102692541	0/0:21,0:21:45:0,45,436	0/0:20,0:20:45:0,45,438	0/0:32,0:32:75:0,75,731	1/1:0,33:34:93:944,93,0	1/1:1,38:39:84:877,84,0	1/1:0,41:41:99:1209,117,0
2	102692757	rs15136645	2:102692757	1/1:0,29:29:57:581,57,0	1/1:0,37:37:93:924,93,0	1/1:0,31:32:63:652,63,0	0/0:31,0:31:84:0,84,864	0/0:44,0:46:99:0,120,1259	0/0:32,0:32:75:0,75,791
2	102692835	rs29006376	2:102692835	1/1:0,26:27:48:461,48,0	1/1:0,33:34:81:820,81,0	1/1:0,28:28:63:636,63,0	0/0:39,0:39:99:0,105,1109	0/0:47,0:47:99:0,120,1270	0/0:31,0:31:84:0,84,885
2	102692851	rs29006377	2:102692851	1/1:0,27:27:54:526,54,0	1/1:0,31:32:81:862,81,0	1/1:0,29:31:66:669,66,0	0/0:41,0:42:99:0,108,1062	0/0:42,1:44:84:0,84,1084	0/0:33,0:33:84:0,84,857
2	102692863	rs737138922	2:102692863	1/1:0,24:24:39:377,39,0	1/1:0,34:37:78:804,78,0	1/1:2,35:38:44:588,44,0	0/0:43,0:43:99:0,117,1270	0/0:51,0:51:99:0,147,1579	0/0:32,0:32:90:0,90,958
2	102692867	rs740709144	2:102692867	1/1:0,24:24:45:435,45,0	1/1:0,34:35:84:874,84,0	1/1:0,36:37:78:786,78,0	0/0:42,0:42:99:0,105,1029	0/0:52,0:52:99:0,129,1243	0/0:30,0:31:75:0,75,748
2	102693038	rs10730103	2:102693038	1/1:0,31:31:75:756,75,0	1/1:0,32:32:81:812,81,0	1/1:0,25:25:69:707,69,0	0/0:39,0:40:99:0,111,1130	0/0:49,0:49:99:0,120,1242	0/0:34,0:34:93:0,93,988
2	102693053	rs736676012	2:102693053	1/1:0,28:30:69:715,69,0	1/1:0,30:31:78:797,78,0	1/1:0,24:24:60:625,60,0	0/0:44,0:45:99:0,111,1153	0/0:51,0:51:99:0,126,1323	0/0:33,0:33:87:0,87,932
2	102693192	rs733025236	2:102693192	0/0:33,0:33:60:0,60,596	0/0:24,0:24:48:0,48,513	0/0:38,0:39:93:0,93,951	1/1:0,46:48:99:1086,105,0	1/1:0,40:40:99:1122,108,0	1/1:0,49:49:99:1188,117,0
2	102693339	rs315240133	2:102693339	1/1:0,33:34:78:792,78,0	1/1:0,32:32:78:792,78,0	1/1:0,33:34:69:670,69,0	0/0:43,0:43:99:0,120,1314	0/0:48,0:48:99:0,126,1418	0/0:23,0:23:63:0,63,679
2	102693535	rs316459201	2:102693535	1/1:0,34:34:87:878,87,0	1/1:0,26:27:57:575,57,0	1/1:0,39:39:93:952,93,0	0/0:35,0:36:96:0,96,1012	0/0:44,0:44:99:0,111,1141	0/0:31,0:31:87:0,87,913
2	102701086	rs734010965	2:102701086	0/0:32,0:32:81:0,81,839	0/0:42,0:43:99:0,108,1122	0/0:32,0:32:75:0,75,773	1/1:0,45:45:99:1425,132,0	1/1:0,36:36:99:1118,108,0	1/1:0,22:22:54:582,54,0
2	102702772	rs740296500	2:102702772	0/0:31,0:32:78:0,78,809	0/0:24,0:26:57:0,57,589	0/0:26,0:28:66:0,66,669	1/1:0,30:30:75:795,75,0	1/1:0,38:39:99:1080,99,0	1/1:0,29:29:72:791,72,0
2	102703334	rs314000838	2:102703334	1/1:0,35:35:90:954,90,0	1/1:0,21:21:48:536,48,0	1/1:0,42:42:96:1006,96,0	0/0:41,0:41:90:0,90,860	0/0:31,0:31:75:0,75,715	0/0:48,0:48:99:0,132,1266
2	102708691	rs10722585	2:102708691	0/0:31,0:32:81:0,81,845	0/0:26,0:26:66:0,66,722	0/0:30,0:30:69:0,69,673	1/1:0,33:33:87:916,87,0	1/1:0,36:36:99:1091,102,0	1/1:0,35:36:99:1071,102,0
2	102708979	rs10730897	2:102708979	1/1:0,27:28:69:729,69,0	1/1:0,28:28:66:699,66,0	1/1:0,34:36:84:832,84,0	0/0:23,0:24:57:0,57,533	0/0:39,0:39:99:0,102,1029	0/0:35,0:35:78:0,78,772
2	102709107	rs737748024	2:102709107	0/0:28,0:28:51:0,51,535	0/0:27,0:27:69:0,69,722	0/0:33,0:33:81:0,81,827	1/1:0,34:34:93:1009,93,0	1/1:0,40:40:99:1209,114,0	1/1:0,29:29:78:834,78,0
2	102713391	rs732792307	2:102713391	1/1:0,34:35:75:763,75,0	1/1:0,35:35:84:840,84,0	1/1:0,36:37:99:1025,99,0	0/0:39,0:39:93:0,93,886	0/0:34,0:34:90:0,90,872	0/0:40,2:42:75:0,75,921
2	102713392	rs315813915	2:102713392	1/1:1,34:35:87:895,87,0	1/1:0,37:37:93:945,93,0	1/1:0,37:37:90:970,90,0	0/0:40,0:40:99:0,99,940	0/0:35,0:35:84:0,84,779	0/0:41,0:42:99:0,99,964
2	102715331	rs317147662	2:102715331	1/1:0,19:19:51:554,51,0	1/1:0,24:26:54:556,54,0	1/1:0,31:32:78:848,78,0	0/0:34,0:34:93:0,93,1008	0/0:38,0:39:99:0,105,1139	0/0:44,0:44:99:0,105,1128
2	102717202	rs14228287	2:102717202	1/1:0,29:30:63:596,63,0	1/1:0,39:39:78:725,78,0	1/1:0,24:26:57:547,57,0	0/0:31,0:31:87:0,87,947	0/0:48,1:49:99:0,129,1384	0/0:41,0:41:99:0,111,1243
2	102719537	rs314665938	2:102719537	0/0:30,0:30:69:0,69,723	0/0:34,0:35:78:0,78,806	0/0:45,0:46:99:0,99,1070	1/1:0,38:39:93:904,93,0	1/1:0,44:44:99:985,102,0	1/1:0,41:41:81:818,81,0
2	102720517	rs315518206	2:102720517	1/1:1,43:44:85:1071,85,0	1/1:0,27:27:72:724,72,0	1/1:0,37:37:90:919,90,0	0/0:36,0:36:96:0,96,1035	0/0:54,0:54:99:0,153,1652	0/0:36,0:36:99:0,99,1090
2	102721472	rs312290522	2:102721472	1/1:0,37:38:90:942,90,0	1/1:0,23:23:60:626,60,0	1/1:0,38:38:99:1144,108,0	0/0:40,0:40:99:0,105,1051	0/0:43,0:45:99:0,108,1094	0/0:43,0:43:99:0,105,1020
2	102721563	rs315911364	2:102721563	1/1:0,31:33:69:613,69,0	1/1:0,21:21:42:393,42,0	1/1:0,37:37:69:604,69,0	0/0:30,0:32:84:0,84,912	0/0:46,0:46:99:0,117,1295	0/0:46,0:46:99:0,120,1325
2	102726120	rs315439214	2:102726120	1/1:0,21:22:54:577,54,0	1/1:0,16:17:36:370,36,0	1/1:0,31:31:48:477,48,0	0/0:41,0:42:99:0,102,972	0/0:37,0:39:81:0,81,792	0/0:26,0:26:54:0,54,537
2	102726197	rs734986915	2:102726197	0/0:31,0:31:72:0,72,746	0/0:28,0:29:69:0,69,698	0/0:38,0:40:93:0,93,937	1/1:0,45:45:99:1147,108,0	1/1:0,36:37:90:973,90,0	1/1:0,33:34:72:768,72,0
2	102727201	rs314516277	2:102727201	0/0:44,0:45:99:0,111,1075	0/0:27,0:28:66:0,66,649	0/0:38,0:38:93:0,93,891	1/1:0,39:39:99:1185,111,0	1/1:0,39:39:99:1215,111,0	1/1:0,40:40:99:1180,108,0
2	102909180	rs313879566	2:102909180	0/0:15,0:15:30:0,30,312	0/0:23,0:23:54:0,54,545	0/0:20,0:20:45:0,45,448	1/1:0,15:16:21:204,21,0	1/1:0,26:26:66:684,66,0	1/1:0,16:18:39:410,39,0
2	102909228	rs312295911	2:102909228	1/1:0,8:8:21:221,21,0	1/1:0,14:16:30:288,30,0	1/1:0,16:18:30:296,30,0	0/0:19,0:20:45:0,45,460	0/0:20,0:20:54:0,54,548	0/0:21,0:21:51:0,51,528
2	102921264	rs313209053	2:102921264	0/0:31,0:33:57:0,57,515	0/0:29,0:30:78:0,78,727	0/0:35,0:35:87:0,87,772	1/1:0,47:47:99:1309,120,0	1/1:0,40:40:99:1112,102,0	1/1:0,47:48:99:1288,120,0
2	102959614	rs15137003	2:102959614	1/1:0,31:32:69:683,69,0	1/1:0,29:29:84:814,84,0	1/1:0,32:33:75:756,75,0	0/0:40,0:41:99:0,105,1119	0/0:38,0:38:99:0,108,1148	0/0:40,0:40:99:0,105,1131
2	102959632	rs315495629	2:102959632	1/1:0,32:32:90:913,90,0	1/1:0,24:25:51:506,51,0	1/1:0,35:36:93:944,93,0	0/0:42,0:43:99:0,105,1031	0/0:33,0:33:72:0,72,713	0/0:41,0:41:99:0,105,1001
2	103049387	rs312889948	2:103049387	0/0:33,0:33:93:0,93,986	0/0:27,0:27:63:0,63,658	0/0:40,0:42:99:0,105,1074	1/1:0,33:34:81:854,81,0	1/1:0,49:49:99:1427,135,0	1/1:0,37:37:99:1067,99,0
2	103051288	rs316092191	2:103051288	0/0:37,0:38:81:0,81,748	0/0:35,0:35:87:0,87,833	0/0:42,0:42:96:0,96,907	1/1:0,49:49:99:1389,129,0	1/1:0,61:61:99:1763,159,0	1/1:0,31:31:87:949,87,0
2	103051340	rs313806083	2:103051340	1/1:0,29:30:81:818,81,0	1/1:0,35:35:87:875,87,0	1/1:0,37:38:99:1067,102,0	0/0:43,0:43:99:0,120,1311	0/0:54,0:54:99:0,150,1664	0/0:24,0:24:69:0,69,732
2	103164555	rs314092501	2:103164555	0/0:33,0:35:69:0,69,688	0/0:24,0:25:45:0,45,488	0/0:36,0:38:78:0,78,825	1/1:0,25:25:60:577,60,0	1/1:0,30:30:69:728,69,0	1/1:0,30:30:78:737,78,0
2	103165769	rs314276838	2:103165769	0/0:24,1:26:57:0,57,584	0/0:27,0:28:51:0,51,542	0/0:23,0:23:54:0,54,558	1/1:0,38:38:78:837,78,0	1/1:0,49:49:99:1284,123,0	1/1:0,37:38:99:1096,99,0
2	103166245	rs734141342	2:103166245	0/0:42,0:42:99:0,114,1231	0/0:26,0:26:66:0,66,701	0/0:34,0:34:96:0,96,987	1/1:0,32:32:90:975,90,0	1/1:0,40:42:99:1191,111,0	1/1:0,36:37:93:973,93,0
2	103166589	rs740774778	2:103166589	0/0:39,0:40:96:0,96,971	0/0:31,0:32:75:0,75,802	0/0:37,0:37:84:0,84,886	1/1:0,45:45:99:1343,126,0	1/1:0,40:41:99:1103,102,0	1/1:0,38:38:93:966,93,0
2	103166618	rs731945096	2:103166618	0/0:38,0:38:96:0,96,1038	0/0:39,0:39:93:0,93,977	0/0:38,0:39:96:0,96,1021	1/1:0,41:41:99:1031,108,0	1/1:0,37:37:93:916,93,0	1/1:0,32:33:72:699,72,0
2	110069567	rs732964557	2:110069567	1/1:0,29:29:60:600,60,0	1/1:0,33:34:75:743,75,0	1/1:0,40:40:90:869,90,0	0/0:48,0:49:99:0,123,1327	0/0:67,0:67:99:0,192,2083	0/0:44,0:44:99:0,117,1287
2	110069701	rs738650839	2:110069701	1/1:0,34:34:78:773,78,0	1/1:0,21:22:60:629,60,0	1/1:0,33:33:84:866,84,0	0/0:47,0:49:99:0,114,1256	0/0:50,0:50:99:0,123,1359	0/0:41,0:42:99:0,102,1104
2	110070091	rs735474644	2:110070091	1/1:0,42:44:99:1052,99,0	1/1:0,34:35:96:1001,96,0	1/1:0,33:33:84:864,84,0	0/0:50,0:50:99:0,135,1290	0/0:50,0:50:99:0,117,1111	0/0:54,0:54:99:0,138,1345
2	110872706	rs80568154	2:110872706	1/1:0,35:35:81:832,81,0	1/1:0,37:37:99:1014,99,0	1/1:0,27:28:60:581,60,0	0/0:49,0:50:99:0,126,1342	0/0:38,0:39:90:0,90,989	0/0:47,0:47:99:0,132,1445
2	110877422	rs734633313	2:110877422	1/1:0,36:36:99:1041,102,0	1/1:0,22:22:54:571,54,0	1/1:0,32:32:78:761,78,0	0/0:42,0:42:99:0,102,1094	0/0:45,0:45:99:0,126,1290	0/0:30,0:31:81:0,81,836
2	110877701	rs732134836	2:110877701	1/1:1,40:42:75:765,75,0	1/1:0,21:21:48:493,48,0	1/1:0,25:25:57:578,57,0	0/0:50,0:50:99:0,114,1114	0/0:32,0:32:84:0,84,805	0/0:36,0:36:99:0,99,955
2	110877704	rs735491848	2:110877704	1/1:0,41:42:81:817,81,0	1/1:0,21:21:54:561,54,0	1/1:0,26:26:66:682,66,0	0/0:51,0:51:99:0,126,1256	0/0:31,0:32:75:0,75,763	0/0:33,0:33:90:0,90,908
2	110877741	rs740206617	2:110877741	0/0:38,0:39:87:0,87,896	0/0:24,0:24:54:0,54,549	0/0:33,0:33:75:0,75,782	1/1:0,51:51:99:1442,132,0	1/1:0,37:37:87:940,87,0	1/1:0,32:32:87:941,87,0
2	110877746	rs732699961	2:110877746	0/0:37,0:38:78:0,78,706	0/0:22,0:22:48:0,48,454	0/0:32,0:33:75:0,75,737	1/1:0,50:51:99:1269,114,0	1/1:0,36:37:87:943,87,0	1/1:0,36:36:93:992,93,0
2	110877768	rs29007045	2:110877768	0/0:36,0:36:87:0,87,903	0/0:19,0:19:48:0,48,501	0/0:32,0:34:75:0,75,779	1/1:0,49:49:99:1335,132,0	1/1:0,35:35:93:933,93,0	1/1:0,33:33:96:958,96,0
2	110878134	rs316458738	2:110878134	0/0:27,0:27:66:0,66,678	0/0:37,0:39:78:0,78,816	0/0:38,0:38:90:0,90,958	1/1:0,50:50:99:1388,132,0	1/1:0,41:42:99:1173,114,0	1/1:0,37:38:99:1088,102,0
2	110921720	rs16103954	2:110921720	0/0:27,0:27:57:0,57,589	0/0:26,0:27:51:0,51,516	0/0:29,0:29:57:0,57,621	1/1:0,23:24:57:556,57,0	1/1:0,33:33:93:939,93,0	1/1:0,23:25:57:589,57,0
2	110921879	rs80660127	2:110921879	0/0:29,1:32:66:0,66,657	0/0:15,0:18:36:0,36,368	0/0:21,0:24:54:0,54,574	1/1:0,23:23:60:620,60,0	1/1:0,37:37:96:956,96,0	1/1:0,35:35:87:871,87,0
2	113033839	rs734326375	2:113033839	0/0:29,0:29:69:0,69,722	0/0:31,0:32:66:0,66,671	0/0:31,0:32:84:0,84,885	1/1:0,48:49:99:958,99,0	1/1:0,36:36:81:788,81,0	1/1:0,42:42:99:1004,102,0
2	113066775	.	2:113066775	0/0:34,0:34:39:0,39,350	0/0:26,0:27:30:0,30,273	0/0:29,0:29:33:0,33,319	1/1:0,27:27:48:499,48,0	1/1:0,33:33:63:674,63,0	1/1:0,13:13:21:207,21,0
2	114892825	rs10728366	2:114892825	0/0:26,0:26:63:0,63,648	0/0:31,0:32:81:0,81,814	0/0:29,0:30:69:0,69,743	1/1:0,34:34:90:879,90,0	1/1:0,39:39:99:986,99,0	1/1:2,29:32:12:614,12,0
2	114893536	rs738122248	2:114893536	0/0:20,0:23:54:0,54,512	0/0:23,0:23:54:0,54,505	0/0:26,0:26:60:0,60,574	1/1:0,28:28:78:847,78,0	1/1:0,34:35:90:1000,90,0	1/1:0,31:31:75:807,75,0
2	115050472	rs316669858	2:115050472	0/0:24,1:25:51:0,51,506	0/0:25,1:26:54:0,54,559	0/0:25,0:25:51:0,51,546	1/1:1,29:30:62:863,62,0	1/1:0,16:18:42:469,42,0	1/1:0,26:26:72:799,72,0
2	115051856	rs314867038	2:115051856	0/0:31,0:31:78:0,78,721	0/0:30,0:30:63:0,63,608	0/0:47,0:49:96:0,96,934	1/1:0,27:27:75:798,75,0	1/1:0,33:33:87:902,87,0	1/1:0,32:32:84:911,84,0
2	115053169	rs317314649	2:115053169	1/1:0,41:41:81:865,81,0	1/1:0,35:35:81:865,81,0	1/1:0,36:37:69:688,69,0	0/0:46,0:46:99:0,108,1148	0/0:29,0:29:69:0,69,751	0/0:46,0:46:93:0,93,961
2	115072794	rs737251981	2:115072794	0/0:4,0:4:9:0,9,87	0/0:6,0:6:6:0,6,69	0/0:1,0:1:3:0,3,26	1/1:0,25:25:24:259,24,0	1/1:0,38:38:30:305,30,0	1/1:0,9:9:15:144,15,0
2	115079757	rs15145313	2:115079757	0/0:30,0:30:57:0,57,504	0/0:22,0:23:36:0,36,331	0/0:27,0:28:57:0,57,507	1/1:0,40:40:99:1199,111,0	1/1:0,31:32:87:918,87,0	1/1:0,15:15:45:486,45,0
2	115080002	rs16110013	2:115080002	0/0:28,0:28:60:0,60,623	0/0:17,0:18:42:0,42,415	0/0:33,0:34:81:0,81,854	1/1:0,32:32:87:908,87,0	1/1:0,31:31:87:945,87,0	1/1:0,35:35:96:1027,96,0
2	115080249	rs740302795	2:115080249	0/0:28,0:28:75:0,75,799	0/0:25,0:27:48:0,48,495	0/0:23,0:24:60:0,60,629	1/1:0,31:32:66:620,66,0	1/1:0,29:29:72:682,72,0	1/1:0,24:24:63:614,63,0
2	115080411	rs317635118	2:115080411	1/1:0,28:29:69:709,69,0	1/1:0,22:23:45:436,45,0	1/1:0,35:37:87:890,87,0	0/0:26,0:26:51:0,51,466	0/0:43,0:43:99:0,111,1054	0/0:33,0:33:87:0,87,802
2	117439205	rs10728700	2:117439205	0/0:19,0:20:30:0,30,276	0/0:21,0:21:51:0,51,439	0/0:23,0:23:51:0,51,484	1/1:0,25:26:63:688,63,0	1/1:0,31:32:72:789,72,0	1/1:0,23:23:63:674,63,0
2	117439668	rs317794963	2:117439668	0/0:37,0:37:93:0,93,957	0/0:28,0:30:72:0,72,761	0/0:31,0:31:69:0,69,725	1/1:0,31:32:75:690,75,0	1/1:0,36:36:81:757,81,0	1/1:0,30:30:78:763,78,0
2	125864341	rs314958243	2:125864341	1/1:1,41:43:99:1086,108,0	1/1:0,38:38:93:983,93,0	1/1:0,35:36:81:842,81,0	0/0:59,0:61:99:0,165,1653	0/0:34,0:34:78:0,78,810	0/0:33,0:33:78:0,78,766
2	125864397	rs313056451	2:125864397	1/1:1,37:38:99:1080,105,0	1/1:0,33:33:84:871,84,0	1/1:0,30:30:84:850,84,0	0/0:58,0:58:99:0,147,1571	0/0:30,0:30:81:0,81,879	0/0:36,0:36:99:0,99,1059
2	125914195	rs16133550	2:125914195	1/1:0,39:39:90:933,90,0	1/1:0,26:27:57:600,57,0	1/1:0,23:23:63:676,63,0	0/0:41,0:41:99:0,105,1120	0/0:57,0:58:99:0,153,1631	0/0:40,0:40:99:0,108,1168
2	125917178	rs315971202	2:125917178	0/0:49,0:49:99:0,135,1391	0/0:41,0:41:99:0,117,1206	0/0:28,0:28:66:0,66,699	1/1:0,44:44:99:1136,117,0	1/1:0,49:49:99:1251,123,0	1/1:0,35:35:90:852,90,0
2	126118398	rs316807163	2:126118398	0/0:30,0:30:69:0,69,697	0/0:25,0:25:54:0,54,537	0/0:32,0:33:57:0,57,537	1/1:0,29:32:72:811,72,0	1/1:0,47:48:99:1311,117,0	1/1:0,30:31:66:726,66,0
2	126120862	rs737645029	2:126120862	0/0:19,0:19:45:0,45,442	0/0:26,0:28:60:0,60,625	0/0:28,0:28:72:0,72,717	1/1:0,26:26:66:693,66,0	1/1:0,29:29:75:756,75,0	1/1:0,30:30:87:870,87,0
2	126121576	rs316794996	2:126121576	0/0:16,0:16:42:0,42,442	0/0:20,0:22:45:0,45,460	0/0:27,0:27:69:0,69,696	1/1:0,29:29:78:848,78,0	1/1:0,45:45:99:1297,117,0	1/1:0,27:27:72:762,72,0
2	126125517	rs312446570	2:126125517	0/0:35,0:35:81:0,81,846	0/0:33,1:34:69:0,69,652	0/0:33,0:34:78:0,78,804	1/1:0,45:45:99:1330,120,0	1/1:0,31:31:81:863,81,0	1/1:0,46:46:99:1353,123,0
2	126125647	rs313219018	2:126125647	0/0:33,0:33:84:0,84,894	0/0:33,0:33:81:0,81,840	0/0:30,0:30:81:0,81,864	1/1:0,36:36:90:993,90,0	1/1:0,45:47:99:1176,111,0	1/1:0,24:25:63:648,63,0
2	126138136	rs312996158	2:126138136	1/1:0,33:33:90:973,90,0	1/1:0,25:26:69:717,69,0	1/1:0,25:25:63:646,63,0	0/0:35,0:35:84:0,84,799	0/0:35,0:36:93:0,93,883	0/0:39,0:39:93:0,93,870
2	126151162	rs10721727	2:126151162	0/0:29,0:32:54:0,54,561	0/0:28,1:29:60:0,60,630	0/0:36,1:38:93:0,93,961	1/1:0,38:39:99:967,102,0	1/1:0,50:51:99:1180,123,0	1/1:0,49:49:99:1018,108,0
2	126151876	rs314855887	2:126151876	0/0:28,0:29:63:0,63,589	0/0:29,0:30:60:0,60,584	0/0:26,0:26:51:0,51,470	1/1:0,47:47:99:1385,129,0	1/1:0,41:41:99:1256,117,0	1/1:0,29:29:78:850,78,0
2	126152920	rs314483668	2:126152920	1/1:0,19:19:45:433,45,0	1/1:0,21:21:42:407,42,0	1/1:0,27:27:60:559,60,0	0/0:21,0:21:60:0,60,648	0/0:40,0:41:99:0,114,1218	0/0:41,0:41:99:0,111,1214
2	127293947	rs80766294	2:127293947	1/1:0,33:36:78:783,78,0	1/1:0,26:26:60:626,60,0	1/1:0,31:32:66:650,66,0	0/0:38,0:38:99:0,105,1118	0/0:58,0:59:99:0,171,1886	0/0:45,0:45:99:0,123,1379
2	127294163	rs80649623	2:127294163	1/1:0,27:27:78:815,78,0	1/1:1,37:38:96:1037,96,0	1/1:0,41:42:99:1244,120,0	0/0:36,0:36:87:0,87,888	0/0:39,0:39:96:0,96,992	0/0:47,0:48:99:0,114,1200
2	127294632	rs315434416	2:127294632	1/1:0,44:45:99:1208,114,0	1/1:0,30:30:84:892,84,0	1/1:0,46:47:93:979,93,0	0/0:42,0:42:99:0,117,1227	0/0:37,0:37:99:0,99,1053	0/0:54,0:54:99:0,147,1605
3	3070526	rs16215467	3:3070526	1/1:0,30:30:84:876,84,0	1/1:0,19:21:42:448,42,0	1/1:0,31:32:78:805,78,0	0/0:29,0:29:78:0,78,729	0/0:35,0:36:81:0,81,813	0/0:24,0:25:57:0,57,543
3	3070651	rs16215470	3:3070651	1/1:0,31:31:72:718,72,0	1/1:0,24:24:57:582,57,0	1/1:0,29:30:66:698,66,0	0/0:26,0:27:63:0,63,611	0/0:29,0:30:78:0,78,788	0/0:27,0:27:69:0,69,667
3	3070678	rs737739243	3:3070678	1/1:0,33:33:63:620,63,0	1/1:0,26:26:51:515,51,0	1/1:0,27:27:63:643,63,0	0/0:24,0:25:54:0,54,513	0/0:27,0:27:69:0,69,712	0/0:27,0:27:66:0,66,650
3	3071074	rs735608908	3:3071074	1/1:0,39:39:93:966,93,0	1/1:0,30:30:72:705,72,0	1/1:0,34:34:60:620,60,0	0/0:42,0:42:99:0,114,1234	0/0:26,0:26:75:0,75,837	0/0:36,0:36:93:0,93,984
3	3092961	rs314078837	3:3092961	1/1:0,31:34:60:551,60,0	1/1:0,31:31:75:702,75,0	1/1:1,28:29:37:541,37,0	0/0:33,0:33:81:0,81,885	0/0:40,0:41:99:0,99,1055	0/0:32,0:32:81:0,81,885
3	3099130	rs313198183	3:3099130	1/1:0,31:31:84:846,84,0	1/1:0,29:29:78:822,78,0	1/1:0,39:39:84:861,84,0	0/0:32,0:32:69:0,69,747	0/0:55,0:56:99:0,135,1394	0/0:38,0:40:99:0,105,1076
3	3112758	rs741023657	3:3112758	1/1:0,41:41:87:913,87,0	1/1:0,29:29:72:775,72,0	1/1:0,39:39:99:1048,99,0	0/0:38,0:38:99:0,105,970	0/0:39,0:40:99:0,102,952	0/0:41,0:41:99:0,105,1036
3	3130988	rs733335103	3:3130988	0/0:19,0:20:42:0,42,444	0/0:16,0:16:33:0,33,343	0/0:11,0:11:27:0,27,286	1/1:0,20:21:42:435,42,0	1/1:0,28:29:72:725,72,0	1/1:0,20:21:48:486,48,0
3	3134270	rs737748176	3:3134270	0/0:21,0:21:42:0,42,422	0/0:21,0:22:57:0,57,598	0/0:20,1:23:22:0,22,431	1/1:0,24:24:60:622,60,0	1/1:0,35:35:96:979,96,0	1/1:0,23:23:54:529,54,0
3	3134392	rs731588356	3:3134392	1/1:0,27:27:66:672,66,0	1/1:0,18:23:45:449,45,0	1/1:0,29:30:78:765,78,0	0/0:32,0:33:72:0,72,701	0/0:34,0:34:78:0,78,771	0/0:34,0:34:84:0,84,832
3	3134413	rs316183282	3:3134413	1/1:1,22:23:48:493,48,0	1/1:0,22:22:51:489,51,0	1/1:0,30:30:63:603,63,0	0/0:35,0:35:96:0,96,939	0/0:33,0:33:81:0,81,852	0/0:34,0:34:93:0,93,913
3	3134439	rs739061513	3:3134439	1/1:0,20:20:42:386,42,0	1/1:0,19:19:45:415,45,0	1/1:0,27:28:45:420,45,0	0/0:36,0:36:99:0,99,1076	0/0:37,0:37:99:0,105,1148	0/0:29,0:29:75:0,75,803
3	3134560	rs731492468	3:3134560	1/1:0,29:29:69:701,69,0	1/1:0,22:25:60:634,60,0	1/1:0,23:24:57:575,57,0	0/0:31,0:32:90:0,90,968	0/0:39,0:39:99:0,108,1162	0/0:29,0:29:69:0,69,742
3	3134603	rs312736352	3:3134603	1/1:0,24:25:57:551,57,0	1/1:0,24:26:60:634,60,0	1/1:0,27:28:60:571,60,0	0/0:35,0:35:81:0,81,855	0/0:33,0:33:81:0,81,874	0/0:28,0:28:72:0,72,772
3	3669659	rs316446653	3:3669659	1/1:1,36:37:78:691,78,0	1/1:0,29:29:78:679,78,0	1/1:0,47:47:96:849,96,0	0/0:47,0:49:99:0,111,1174	0/0:51,0:51:99:0,114,1233	0/0:42,0:42:99:0,102,1079
3	3671881	rs313342597	3:3671881	1/1:1,35:36:66:904,66,0	1/1:1,42:45:99:1206,114,0	1/1:0,31:31:81:847,81,0	0/0:49,1:50:99:0,138,1509	0/0:55,0:55:99:0,150,1677	0/0:45,0:46:99:0,123,1357
3	3671885	rs732532383	3:3671885	1/1:0,37:38:75:741,75,0	1/1:1,45:46:99:1249,123,0	1/1:2,31:33:63:663,63,0	0/0:49,0:50:99:0,120,1294	0/0:53,0:55:99:0,135,1472	0/0:46,0:47:99:0,114,1240
3	3673496	rs315641547	3:3673496	1/1:0,41:41:90:809,90,0	1/1:0,31:31:69:625,69,0	1/1:0,33:33:54:512,54,0	0/0:34,0:34:90:0,90,992	0/0:47,0:47:99:0,123,1360	0/0:41,0:41:99:0,111,1165
3	3683836	rs312353617	3:3683836	1/1:0,35:36:81:756,81,0	1/1:0,26:26:48:426,48,0	1/1:0,44:44:99:976,99,0	0/0:51,0:51:99:0,135,1475	0/0:49,1:50:99:0,123,1332	0/0:48,0:48:99:0,117,1275
3	3683859	rs315015331	3:3683859	1/1:0,35:35:78:810,78,0	1/1:0,27:28:57:567,57,0	1/1:1,40:42:67:922,67,0	0/0:50,0:50:99:0,150,1620	0/0:42,0:43:99:0,111,1247	0/0:49,0:49:99:0,132,1459
3	3694318	rs312339236	3:3694318	1/1:0,21:23:48:482,48,0	1/1:0,32:33:75:790,75,0	1/1:0,24:26:54:552,54,0	0/0:42,0:42:99:0,117,1203	0/0:49,0:49:99:0,129,1350	0/0:49,0:49:99:0,123,1239
3	3714177	rs16216306	3:3714177	1/1:0,38:38:99:1202,114,0	1/1:0,42:42:99:1143,108,0	1/1:0,40:41:99:1074,102,0	0/0:36,0:37:90:0,90,937	0/0:36,0:36:96:0,96,959	0/0:43,0:44:99:0,117,1230
3	8517428	rs316515279	3:8517428	0/0:35,0:36:93:0,93,888	0/0:34,0:34:78:0,78,763	0/0:29,0:31:72:0,72,692	1/1:0,43:43:99:1246,117,0	1/1:0,50:50:99:1375,123,0	1/1:0,45:46:99:1344,126,0
3	8519539	rs16224033	3:8519539	0/0:35,0:36:66:0,66,599	0/0:23,0:24:48:0,48,458	0/0:42,0:42:96:0,96,893	1/1:0,33:33:72:766,72,0	1/1:0,38:40:93:954,93,0	1/1:0,35:35:96:1025,96,0
3	8522718	rs312371413	3:8522718	0/0:33,0:33:87:0,87,805	0/0:29,0:29:63:0,63,621	0/0:32,0:32:81:0,81,779	1/1:0,33:33:90:970,90,0	1/1:0,25:25:63:674,63,0	1/1:0,33:34:81:874,81,0
3	8522742	rs314605407	3:8522742	0/0:29,0:29:72:0,72,726	0/0:26,0:26:69:0,69,695	0/0:28,0:29:69:0,69,690	1/1:0,31:31:63:694,63,0	1/1:0,22:23:54:584,54,0	1/1:0,33:33:90:978,90,0
3	11751885	rs317787665	3:11751885	1/1:1,30:31:60:536,60,0	1/1:0,32:32:57:506,57,0	1/1:3,24:27:36:330,36,0	0/0:35,0:36:99:0,99,1096	0/0:54,0:54:99:0,144,1608	0/0:44,0:44:99:0,111,1218
3	11768544	rs316809455	3:11768544	1/1:0,27:27:72:768,72,0	1/1:0,27:28:69:731,69,0	1/1:0,25:25:57:601,57,0	0/0:38,0:38:99:0,102,958	0/0:37,0:38:90:0,90,847	0/0:28,0:28:63:0,63,559
3	11768598	rs313076966	3:11768598	1/1:0,19:19:54:529,54,0	1/1:1,28:29:69:644,69,0	1/1:0,21:22:45:415,45,0	0/0:41,0:41:99:0,111,1097	0/0:41,0:41:99:0,108,1029	0/0:24,1:25:54:0,54,517
3	11936565	rs315954152	3:11936565	1/1:0,36:36:90:903,90,0	1/1:0,26:27:57:589,57,0	1/1:0,48:49:84:893,84,0	0/0:44,0:45:99:0,108,1146	0/0:41,0:41:96:0,96,1034	0/0:41,0:42:99:0,102,1099
3	11937035	rs735287691	3:11937035	1/1:0,17:17:45:452,45,0	1/1:0,17:17:33:342,33,0	1/1:0,26:26:54:562,54,0	0/0:23,0:23:48:0,48,529	0/0:16,0:16:36:0,36,378	0/0:18,0:18:51:0,51,554
3	12040861	rs312794960	3:12040861	1/1:0,38:38:96:1006,96,0	1/1:0,29:29:81:829,81,0	1/1:0,34:35:93:963,93,0	0/0:45,0:45:99:0,129,1346	0/0:39,0:40:99:0,105,1102	0/0:43,0:43:99:0,117,1229
3	12041762	rs317413534	3:12041762	1/1:0,34:34:90:932,90,0	1/1:0,30:30:72:757,72,0	1/1:0,35:35:81:834,81,0	0/0:47,1:49:94:0,94,1188	0/0:48,0:48:99:0,123,1169	0/0:37,0:37:99:0,99,934
3	12068934	rs730968033	3:12068934	1/1:0,34:35:75:769,75,0	1/1:1,44:45:85:1189,85,0	1/1:0,30:31:75:761,75,0	0/0:37,0:37:96:0,96,1079	0/0:53,0:53:99:0,150,1643	0/0:54,0:55:99:0,141,1520
3	12069563	rs14085375	3:12069563	1/1:0,26:27:69:711,69,0	1/1:0,28:30:63:644,63,0	1/1:0,38:39:93:950,93,0	0/0:42,0:42:99:0,102,975	0/0:35,0:35:75:0,75,715	0/0:34,0:34:75:0,75,746
3	21366972	rs737636330	3:21366972	0/0:30,4:35:66:0,66,676	0/0:20,1:21:48:0,48,490	0/0:32,1:33:78:0,78,815	1/1:0,32:32:84:848,84,0	1/1:0,32:32:75:762,75,0	1/1:0,35:36:90:900,90,0
3	21367108	rs317159847	3:21367108	0/0:31,0:32:63:0,63,574	0/0:20,0:20:45:0,45,418	0/0:22,0:22:51:0,51,469	1/1:0,28:28:75:809,75,0	1/1:0,40:40:99:1176,108,0	1/1:0,37:38:96:1050,96,0
3	21505129	.	3:21505129	0/0:23,0:24:54:0,54,498	0/0:28,0:30:48:0,48,454	0/0:36,0:37:60:0,60,526	1/1:0,24:24:48:494,48,0	1/1:1,29:31:66:671,66,0	1/1:0,28:29:63:664,63,0
3	21508151	rs312769004	3:21508151	0/0:29,0:30:63:0,63,596	0/0:29,0:29:63:0,63,617	0/0:25,0:25:54:0,54,522	1/1:0,47:47:99:1339,126,0	1/1:0,42:42:99:1196,114,0	1/1:0,28:28:63:678,63,0
3	21511339	rs314009812	3:21511339	0/0:36,2:38:78:0,78,823	0/0:20,0:20:54:0,54,568	0/0:43,0:43:99:0,105,1104	1/1:0,41:42:99:1094,102,0	1/1:0,41:41:99:1177,108,0	1/1:0,45:46:99:1378,126,0
3	26451036	rs740748482	3:26451036	1/1:0,36:36:96:909,96,0	1/1:0,27:27:60:569,60,0	1/1:0,25:25:66:649,66,0	0/0:40,0:40:96:0,96,1060	0/0:30,0:31:81:0,81,898	0/0:42,0:42:99:0,108,1194
3	26451787	rs317967968	3:26451787	0/0:27,0:28:69:0,69,653	0/0:16,0:18:27:0,27,240	0/0:25,0:25:60:0,60,531	1/1:0,27:27:78:855,78,0	1/1:0,34:35:99:1075,99,0	1/1:0,30:30:87:928,87,0
3	28863762	rs10722728	3:28863762	0/0:53,0:53:99:0,144,1543	0/0:37,1:39:99:0,102,1084	0/0:26,0:26:72:0,72,760	1/1:0,43:43:99:1343,126,0	1/1:0,43:43:99:1238,114,0	1/1:0,58:58:99:1786,165,0
3	28863795	rs315243689	3:28863795	0/0:51,0:51:99:0,123,1175	0/0:31,0:31:66:0,66,588	0/0:24,0:26:60:0,60,560	1/1:0,32:32:90:997,90,0	1/1:1,40:41:99:1146,105,0	1/1:1,55:56:99:1721,132,0
3	28864113	rs732257436	3:28864113	0/0:46,0:46:99:0,117,1246	0/0:38,0:38:93:0,93,983	0/0:30,0:32:78:0,78,789	1/1:0,35:36:90:962,90,0	1/1:0,39:41:72:758,72,0	1/1:0,26:30:66:710,66,0
3	28864260	rs314914029	3:28864260	0/0:41,0:41:87:0,87,887	0/0:30,0:30:87:0,87,890	0/0:34,0:34:84:0,84,874	1/1:1,49:50:99:1192,114,0	1/1:0,37:37:93:985,93,0	1/1:0,38:39:96:1004,96,0
3	28864735	rs314464065	3:28864735	0/0:42,0:42:99:0,102,1032	0/0:30,0:31:57:0,57,605	0/0:32,1:33:72:0,72,746	1/1:0,38:39:99:1190,114,0	1/1:0,47:47:99:1400,129,0	1/1:0,48:48:99:1415,132,0
3	28864821	rs736367812	3:28864821	0/0:36,0:36:99:0,99,1022	0/0:31,0:32:90:0,90,928	0/0:34,0:35:93:0,93,936	1/1:0,49:50:99:1399,132,0	1/1:0,38:38:99:1158,105,0	1/1:0,48:49:99:1367,126,0
3	30214846	rs13722112	3:30214846	1/1:0,40:41:84:769,84,0	1/1:0,29:29:48:439,48,0	1/1:1,39:40:87:786,87,0	0/0:36,0:36:99:0,99,1082	0/0:45,0:46:99:0,132,1453	0/0:55,0:55:99:0,147,1613
3	30215686	rs315513924	3:30215686	1/1:0,26:26:63:634,63,0	1/1:0,21:21:48:483,48,0	1/1:0,30:31:69:702,69,0	0/0:27,0:27:75:0,75,801	0/0:42,0:43:99:0,105,1113	0/0:35,0:35:99:0,99,1071
3	30215783	rs318123593	3:30215783	1/1:0,31:32:75:772,75,0	1/1:0,17:17:36:379,36,0	1/1:0,26:27:66:664,66,0	0/0:35,0:35:99:0,99,1032	0/0:45,1:46:99:0,114,1238	0/0:38,0:38:99:0,99,1063
3	30215803	rs313850652	3:30215803	1/1:0,28:31:54:543,54,0	1/1:0,16:18:39:414,39,0	1/1:0,28:28:66:676,66,0	0/0:29,0:29:72:0,72,769	0/0:45,0:46:99:0,129,1410	0/0:42,0:42:99:0,108,1163
3	30215836	rs317678901	3:30215836	1/1:0,31:34:63:591,63,0	1/1:0,19:19:48:449,48,0	1/1:0,24:24:48:444,48,0	0/0:27,0:28:69:0,69,743	0/0:46,0:46:99:0,117,1282	0/0:40,0:40:99:0,108,1189
3	30215885	rs313245702	3:30215885	1/1:0,33:34:72:722,72,0	1/1:0,23:23:60:597,60,0	1/1:0,23:24:60:604,60,0	0/0:38,0:38:99:0,99,1045	0/0:45,0:46:99:0,132,1393	0/0:40,0:40:99:0,102,1098
3	30216165	rs316501220	3:30216165	1/1:0,32:33:78:750,78,0	1/1:0,23:24:60:591,60,0	1/1:0,28:28:60:566,60,0	0/0:33,0:33:93:0,93,1006	0/0:45,0:45:99:0,126,1345	0/0:37,0:38:93:0,93,1017
3	30216416	rs317960824	3:30216416	1/1:0,31:32:51:464,51,0	1/1:0,24:25:54:484,54,0	1/1:0,33:33:60:559,60,0	0/0:27,0:27:78:0,78,868	0/0:34,0:34:96:0,96,1034	0/0:37,0:37:99:0,108,1198
3	30247175	rs315170967	3:30247175	1/1:0,31:33:69:715,69,0	1/1:0,27:32:57:584,57,0	1/1:0,19:20:42:458,42,0	0/0:22,0:22:60:0,60,636	0/0:32,0:34:90:0,90,925	0/0:32,0:32:90:0,90,946
3	30247569	rs16247241	3:30247569	1/1:0,30:31:72:771,72,0	1/1:0,29:32:75:777,75,0	1/1:0,26:26:54:550,54,0	0/0:29,0:29:69:0,69,653	0/0:53,0:53:99:0,123,1222	0/0:43,0:43:99:0,123,1180
3	30249827	rs316221266	3:30249827	1/1:0,27:28:57:524,57,0	1/1:0,31:31:72:686,72,0	1/1:0,30:30:57:528,57,0	0/0:33,0:34:81:0,81,862	0/0:35,0:35:90:0,90,957	0/0:28,0:29:66:0,66,708
3	30250921	rs312411049	3:30250921	1/1:0,27:27:72:703,72,0	1/1:0,23:24:51:544,51,0	1/1:0,23:23:57:594,57,0	0/0:20,0:20:45:0,45,476	0/0:27,0:27:63:0,63,683	0/0:36,0:36:84:0,84,882
3	30251005	rs16247245	3:30251005	1/1:0,29:30:63:606,63,0	1/1:0,34:35:84:850,84,0	1/1:0,24:24:63:663,63,0	0/0:34,0:36:99:0,99,1053	0/0:48,0:49:99:0,132,1417	0/0:49,0:49:99:0,135,1447
3	30251485	rs316298757	3:30251485	1/1:0,37:38:96:1006,96,0	1/1:0,31:31:84:890,84,0	1/1:0,34:35:99:1020,99,0	0/0:31,0:32:78:0,78,758	0/0:46,0:46:99:0,123,1230	0/0:37,0:37:75:0,75,756
3	30540558	rs315988942	3:30540558	1/1:0,38:38:96:987,96,0	1/1:0,24:24:60:594,60,0	1/1:0,22:22:63:661,63,0	0/0:30,0:30:75:0,75,762	0/0:38,0:38:99:0,102,1060	0/0:33,0:33:81:0,81,831
3	30548185	rs312926876	3:30548185	1/1:1,21:22:48:486,48,0	1/1:0,21:21:63:633,63,0	1/1:2,37:39:69:923,69,0	0/0:35,0:35:99:0,99,1052	0/0:38,0:38:99:0,105,1152	0/0:37,0:37:99:0,99,1098
3	30568764	rs316616788	3:30568764	1/1:0,42:42:99:1184,114,0	1/1:0,18:18:48:481,48,0	1/1:0,32:32:81:843,81,0	0/0:35,0:36:90:0,90,879	0/0:48,0:48:99:0,129,1244	0/0:47,0:48:99:0,114,1119
3	30667150	rs738345457	3:30667150	0/0:28,0:29:63:0,63,661	0/0:26,0:26:54:0,54,544	0/0:33,0:33:57:0,57,551	1/1:0,29:29:69:685,69,0	1/1:0,39:41:90:900,90,0	1/1:0,19:19:39:417,39,0
3	30957656	rs316313200	3:30957656	1/1:0,37:38:87:824,87,0	1/1:0,26:26:72:682,72,0	1/1:0,31:32:69:651,69,0	0/0:35,0:35:93:0,93,1041	0/0:46,0:46:99:0,117,1273	0/0:43,0:43:99:0,123,1343
3	30957662	rs314587867	3:30957662	1/1:0,38:39:81:748,81,0	1/1:0,26:26:66:590,66,0	1/1:0,30:31:66:623,66,0	0/0:35,0:35:90:0,90,1021	0/0:49,0:49:99:0,138,1471	0/0:41,0:41:99:0,120,1312
3	30957668	rs315886497	3:30957668	1/1:0,40:40:84:741,84,0	1/1:0,29:29:69:655,69,0	1/1:0,31:32:63:605,63,0	0/0:37,0:37:99:0,105,1127	0/0:44,0:49:99:0,114,1195	0/0:39,0:40:99:0,99,1059
3	37033175	rs734052574	3:37033175	0/0:38,0:39:84:0,84,800	0/0:40,0:40:84:0,84,831	0/0:34,0:34:84:0,84,793	1/1:0,37:38:96:1003,96,0	1/1:0,41:41:99:1193,111,0	1/1:0,31:31:78:845,78,0
3	37043819	rs317595369	3:37043819	1/1:0,42:42:99:1171,111,0	1/1:0,40:40:99:1136,111,0	1/1:0,30:30:66:645,66,0	0/0:37,0:37:99:0,105,1135	0/0:44,1:45:99:0,117,1306	0/0:44,0:45:99:0,120,1338
3	37043825	rs313827458	3:37043825	1/1:0,42:42:99:1145,111,0	1/1:0,41:42:99:1067,105,0	1/1:0,24:24:54:544,54,0	0/0:33,0:33:93:0,93,973	0/0:46,0:46:99:0,114,1199	0/0:44,0:44:99:0,117,1296
3	37043834	rs316131000	3:37043834	1/1:0,40:42:99:1146,108,0	1/1:0,41:41:99:1081,108,0	1/1:0,21:23:54:538,54,0	0/0:32,0:32:81:0,81,869	0/0:46,0:46:99:0,123,1279	0/0:43,0:43:99:0,114,1211
3	37043882	rs312579191	3:37043882	1/1:0,39:39:99:1080,105,0	1/1:0,40:40:99:1150,114,0	1/1:0,24:25:51:495,51,0	0/0:41,0:41:99:0,108,1000	0/0:50,0:50:99:0,123,1194	0/0:47,0:47:99:0,123,1207
3	38334062	rs16255934	3:38334062	1/1:0,32:32:78:756,78,0	1/1:0,42:43:99:1096,108,0	1/1:0,32:32:84:825,84,0	0/0:38,0:38:99:0,108,1130	0/0:50,0:50:99:0,147,1567	0/0:46,0:46:99:0,126,1360
3	38334075	rs16255936	3:38334075	1/1:0,29:29:63:617,63,0	1/1:0,39:39:93:906,93,0	1/1:0,33:33:81:797,81,0	0/0:40,0:40:99:0,111,1173	0/0:50,0:50:99:0,144,1583	0/0:38,0:38:99:0,108,1179
3	44540501	rs312726017	3:44540501	1/1:0,29:29:81:845,81,0	1/1:0,33:35:78:809,78,0	1/1:0,25:25:69:705,69,0	0/0:42,0:42:96:0,96,942	0/0:43,0:43:99:0,108,1048	0/0:46,0:46:99:0,120,1179
3	44564457	rs317268676	3:44564457	1/1:0,28:28:60:611,60,0	1/1:0,37:37:96:1027,96,0	1/1:0,33:33:72:759,72,0	0/0:51,0:51:99:0,135,1450	0/0:39,0:39:99:0,99,1056	0/0:35,0:36:90:0,90,983
3	45313043	rs13569383	3:45313043	0/0:37,0:38:87:0,87,815	0/0:27,0:28:63:0,63,579	0/0:38,0:39:84:0,84,748	1/1:0,41:41:99:1140,105,0	1/1:2,39:41:82:1096,82,0	1/1:0,46:46:99:1391,132,0
3	45313145	rs13569384	3:45313145	0/0:34,0:35:87:0,87,871	0/0:28,0:29:72:0,72,729	0/0:46,0:46:99:0,129,1350	1/1:0,32:32:90:960,90,0	1/1:0,45:45:99:1263,120,0	1/1:0,34:35:87:931,87,0
3	45323318	rs312409558	3:45323318	1/1:1,27:30:60:598,60,0	1/1:1,40:41:90:907,90,0	1/1:0,32:32:72:711,72,0	0/0:39,0:39:99:0,108,1180	0/0:43,0:44:96:0,96,1035	0/0:35,0:35:90:0,90,1028
3	45323366	rs312268101	3:45323366	1/1:0,31:32:51:515,51,0	1/1:0,28:32:66:686,66,0	1/1:0,28:28:60:589,60,0	0/0:36,0:36:99:0,105,1087	0/0:46,0:47:99:0,117,1199	0/0:38,0:38:93:0,93,925
3	45326848	rs741260325	3:45326848	1/1:0,33:33:81:854,81,0	1/1:0,40:40:99:1209,117,0	1/1:0,21:22:54:550,54,0	0/0:33,0:33:90:0,90,1013	0/0:29,0:29:78:0,78,826	0/0:28,0:28:78:0,78,853
3	45327585	rs14353307	3:45327585	1/1:0,41:41:96:988,96,0	1/1:0,20:20:54:530,54,0	1/1:0,34:34:84:859,84,0	0/0:33,0:33:90:0,90,948	0/0:38,0:38:96:0,96,1009	0/0:45,0:45:99:0,114,1231
3	45330388	rs731583810	3:45330388	1/1:0,27:27:66:678,66,0	1/1:0,43:43:99:1171,117,0	1/1:0,33:34:93:942,93,0	0/0:30,0:30:87:0,87,937	0/0:36,0:37:78:0,78,889	0/0:28,0:30:81:0,81,887
3	45364543	rs317532909	3:45364543	1/1:0,29:29:81:837,81,0	1/1:0,29:29:81:822,81,0	1/1:0,29:30:72:748,72,0	0/0:29,0:30:87:0,87,868	0/0:45,0:45:99:0,123,1237	0/0:45,0:45:99:0,111,1075
3	45369383	rs314000085	3:45369383	1/1:0,30:30:72:714,72,0	1/1:0,33:34:75:785,75,0	1/1:0,35:35:81:832,81,0	0/0:33,0:33:96:0,96,1041	0/0:31,0:32:84:0,84,926	0/0:41,0:42:99:0,108,1189
3	47931323	rs15352432	3:47931323	0/0:31,0:32:78:0,78,796	0/0:33,0:33:75:0,75,764	0/0:26,0:26:63:0,63,665	1/1:0,30:30:81:862,81,0	1/1:0,50:51:99:1340,126,0	1/1:0,44:44:99:1364,123,0
3	47931450	rs15352439	3:47931450	0/0:32,0:34:81:0,81,811	0/0:26,0:27:51:0,51,520	0/0:36,0:37:84:0,84,868	1/1:0,43:43:99:1152,111,0	1/1:1,31:33:81:880,81,0	1/1:0,44:44:99:1179,114,0
3	47932738	rs312530896	3:47932738	0/0:32,0:32:78:0,78,823	0/0:29,0:30:69:0,69,710	0/0:29,0:29:69:0,69,729	1/1:0,40:41:99:1223,111,0	1/1:0,37:37:93:1052,93,0	1/1:0,34:35:90:1007,90,0
3	49868522	rs313158338	3:49868522	0/0:28,0:29:72:0,72,709	0/0:28,0:28:72:0,72,744	0/0:34,0:34:78:0,78,806	1/1:0,39:40:99:1117,105,0	1/1:0,47:47:99:1418,132,0	1/1:0,28:28:72:780,72,0
3	49868558	rs317308904	3:49868558	0/0:27,0:27:48:0,48,503	0/0:24,0:24:48:0,48,497	0/0:33,0:34:81:0,81,815	1/1:0,33:33:84:865,84,0	1/1:0,45:46:99:1268,117,0	1/1:0,31:32:81:859,81,0
3	51722722	rs315711302	3:51722722	1/1:0,28:28:54:570,54,0	1/1:0,27:30:60:610,60,0	1/1:0,32:34:69:683,69,0	0/0:42,1:47:99:0,102,1104	0/0:29,0:31:75:0,75,805	0/0:25,0:25:60:0,60,641
3	51722836	rs316740038	3:51722836	1/1:0,25:25:63:660,63,0	1/1:1,25:26:63:659,63,0	1/1:1,20:21:57:576,57,0	0/0:33,1:35:81:0,81,846	0/0:44,0:45:99:0,114,1236	0/0:36,0:37:99:0,99,1026
3	51723696	rs315359975	3:51723696	1/1:0,27:27:66:655,66,0	1/1:0,22:23:54:535,54,0	1/1:0,25:27:51:525,51,0	0/0:40,0:40:99:0,102,972	0/0:38,0:39:99:0,99,1003	0/0:30,0:31:78:0,78,740
3	51723726	rs735479774	3:51723726	1/1:0,35:35:75:678,75,0	1/1:0,27:27:54:501,54,0	1/1:0,25:25:45:432,45,0	0/0:35,0:35:90:0,90,971	0/0:40,0:40:99:0,114,1268	0/0:30,0:30:78:0,78,835
3	51725786	rs315705623	3:51725786	1/1:0,35:36:90:933,90,0	1/1:0,20:20:54:569,54,0	1/1:0,31:31:78:822,78,0	0/0:39,0:40:99:0,102,1013	0/0:30,0:30:75:0,75,761	0/0:37,0:37:99:0,102,1032
3	52033126	rs312978639	3:52033126	1/1:0,20:20:60:615,60,0	1/1:0,20:21:51:507,51,0	1/1:0,25:25:60:619,60,0	0/0:34,0:34:96:0,96,1050	0/0:37,0:37:90:0,90,966	0/0:39,0:39:99:0,111,1237
3	52035496	rs316953805	3:52035496	1/1:0,29:29:81:826,81,0	1/1:0,34:34:96:1007,96,0	1/1:0,28:28:81:819,81,0	0/0:35,0:35:93:0,93,968	0/0:40,0:40:99:0,108,1161	0/0:29,0:29:75:0,75,782
3	52037851	rs741750095	3:52037851	1/1:0,40:40:90:807,90,0	1/1:1,29:30:69:651,69,0	1/1:0,48:49:99:1103,120,0	0/0:35,0:35:93:0,93,1015	0/0:44,0:45:99:0,126,1400	0/0:40,0:40:99:0,99,1095
3	52153372	rs16278508	3:52153372	1/1:0,43:43:99:1238,120,0	1/1:0,29:29:75:815,75,0	1/1:0,26:26:69:709,69,0	0/0:33,0:33:84:0,84,803	0/0:58,0:58:99:0,141,1362	0/0:33,0:36:87:0,87,836
3	52207202	rs15358884	3:52207202	1/1:0,50:50:96:875,96,0	1/1:0,33:33:72:655,72,0	1/1:0,31:32:51:473,51,0	0/0:31,0:31:78:0,78,841	0/0:39,0:39:99:0,105,1150	0/0:33,0:34:90:0,90,999
3	70834785	rs314510598	3:70834785	0/0:34,0:35:69:0,69,729	0/0:23,1:25:45:0,45,458	0/0:43,0:50:96:0,96,987	1/1:0,33:34:87:886,87,0	1/1:0,51:52:99:1418,135,0	1/1:0,40:41:93:955,93,0
3	70834790	rs314821687	3:70834790	0/0:33,0:35:69:0,69,664	0/0:25,0:25:60:0,60,553	0/0:48,1:50:85:0,85,961	1/1:0,34:34:99:1041,99,0	1/1:0,52:52:99:1581,144,0	1/1:0,38:39:99:1119,105,0
3	70928275	rs314928312	3:70928275	0/0:36,0:36:87:0,87,842	0/0:33,0:34:78:0,78,751	0/0:26,0:26:54:0,54,556	1/1:0,33:36:69:730,69,0	1/1:0,37:37:93:958,93,0	1/1:0,34:35:60:619,60,0
3	70931121	rs736637081	3:70931121	1/1:0,32:32:81:833,81,0	1/1:0,31:31:75:761,75,0	1/1:1,30:31:84:862,84,0	0/0:47,0:48:99:0,123,1314	0/0:45,0:46:99:0,129,1422	0/0:35,0:35:99:0,102,1080
3	70932751	rs317840996	3:70932751	1/1:0,23:25:48:490,48,0	1/1:0,20:20:57:599,57,0	1/1:0,26:27:63:657,63,0	0/0:32,0:32:84:0,84,902	0/0:36,0:36:93:0,93,993	0/0:38,0:39:99:0,102,1094
3	70933006	rs315041580	3:70933006	1/1:0,29:29:84:889,84,0	1/1:0,43:43:99:1179,111,0	1/1:0,41:42:99:1181,114,0	0/0:40,0:40:93:0,93,908	0/0:47,0:48:99:0,120,1183	0/0:49,0:49:99:0,129,1255
3	72555654	rs15389431	3:72555654	0/0:17,0:18:33:0,33,294	0/0:12,0:12:21:0,21,191	0/0:12,1:13:27:0,27,229	1/1:0,30:30:60:651,60,0	1/1:0,19:19:51:538,51,0	1/1:0,26:26:57:577,57,0
3	72555655	rs15389433	3:72555655	0/0:18,0:18:30:0,30,295	0/0:12,0:12:27:0,27,267	0/0:13,0:13:27:0,27,264	1/1:0,30:31:66:686,66,0	1/1:0,20:20:48:506,48,0	1/1:0,26:26:54:561,54,0
3	74843020	rs318195919	3:74843020	1/1:0,27:27:57:603,57,0	1/1:0,32:32:87:910,87,0	1/1:0,43:45:99:1153,111,0	0/0:43,0:43:99:0,114,1106	0/0:37,0:38:87:0,87,848	0/0:43,0:43:99:0,114,1135
3	74843475	rs315268956	3:74843475	1/1:0,35:35:90:933,90,0	1/1:0,34:35:99:1013,99,0	1/1:0,25:25:63:637,63,0	0/0:47,0:47:99:0,126,1359	0/0:36,0:37:96:0,96,1036	0/0:39,0:40:99:0,108,1170
3	74843859	rs313237573	3:74843859	1/1:0,38:38:96:973,96,0	1/1:0,36:36:90:972,90,0	1/1:0,29:29:78:826,78,0	0/0:50,0:50:99:0,123,1323	0/0:42,0:45:99:0,114,1176	0/0:38,0:38:99:0,102,1036
3	76920997	rs313495451	3:76920997	0/0:33,0:35:90:0,90,936	0/0:28,0:28:78:0,78,802	0/0:30,0:30:81:0,81,819	1/1:0,33:34:93:991,93,0	1/1:0,47:47:99:1474,138,0	1/1:0,38:38:99:1145,105,0
3	76921535	rs315408112	3:76921535	0/0:29,1:32:33:0,33,565	0/0:32,0:33:78:0,78,719	0/0:37,0:37:75:0,75,740	1/1:0,36:37:84:882,84,0	1/1:0,46:47:99:1310,126,0	1/1:0,39:39:90:955,90,0
3	80872466	rs317184682	3:80872466	0/0:27,0:27:69:0,69,736	0/0:27,0:28:57:0,57,603	0/0:32,0:33:63:0,63,654	1/1:0,28:28:78:858,78,0	1/1:0,29:30:78:856,78,0	1/1:0,30:31:87:957,87,0
3	80892839	rs735540944	3:80892839	1/1:0,37:38:99:1084,105,0	1/1:0,33:33:87:869,87,0	1/1:0,34:34:90:909,90,0	0/0:42,0:42:99:0,108,1118	0/0:55,1:56:99:0,144,1498	0/0:36,0:36:99:0,105,1088
3	82556771	rs736372262	3:82556771	1/1:0,36:37:69:643,69,0	1/1:0,31:32:63:598,63,0	1/1:0,34:35:84:849,84,0	0/0:32,0:32:87:0,87,948	0/0:43,0:43:99:0,117,1315	0/0:37,0:37:99:0,108,1176
3	82575162	rs314361429	3:82575162	1/1:0,29:29:63:651,63,0	1/1:0,37:39:99:1072,102,0	1/1:0,44:46:99:1238,123,0	0/0:56,0:56:99:0,153,1582	0/0:57,0:57:99:0,153,1661	0/0:50,0:50:99:0,141,1507
3	82575758	rs739486273	3:82575758	1/1:1,35:36:99:1015,99,0	1/1:0,29:29:84:868,84,0	1/1:0,38:38:96:963,96,0	0/0:37,0:38:90:0,90,1002	0/0:44,0:44:99:0,117,1277	0/0:28,0:28:75:0,75,823
3	82575911	rs315770354	3:82575911	1/1:0,19:20:42:440,42,0	1/1:0,31:32:87:873,87,0	1/1:0,31:31:78:760,78,0	0/0:30,0:31:84:0,84,890	0/0:48,0:48:99:0,132,1426	0/0:35,0:35:93:0,93,1013
3	86181587	rs317563803	3:86181587	1/1:0,35:36:84:768,84,0	1/1:0,23:23:57:536,57,0	1/1:0,45:45:90:863,90,0	0/0:47,0:47:99:0,123,1294	0/0:42,0:43:99:0,111,1190	0/0:35,0:37:93:0,93,1000
3	86181812	rs318073236	3:86181812	1/1:0,34:36:84:861,84,0	1/1:0,27:27:63:643,63,0	1/1:0,33:33:75:748,75,0	0/0:46,0:46:99:0,135,1469	0/0:49,0:49:99:0,129,1402	0/0:35,0:35:87:0,87,939
3	86181820	rs312569628	3:86181820	1/1:0,36:36:78:705,78,0	1/1:0,26:27:45:407,45,0	1/1:0,31:31:66:626,66,0	0/0:47,0:47:99:0,132,1444	0/0:51,0:51:99:0,135,1475	0/0:33,0:33:84:0,84,933
3	86181835	rs312934962	3:86181835	1/1:0,37:37:96:967,96,0	1/1:1,26:27:60:624,60,0	1/1:0,25:25:57:558,57,0	0/0:45,0:45:99:0,123,1343	0/0:53,0:53:99:0,144,1569	0/0:33,0:33:87:0,87,969
3	86181843	rs312642114	3:86181843	1/1:0,36:36:93:929,93,0	1/1:0,26:26:69:720,69,0	1/1:0,23:23:51:531,51,0	0/0:42,0:43:99:0,108,1149	0/0:48,0:48:99:0,129,1427	0/0:39,0:39:99:0,102,1065
3	86181858	rs740140284	3:86181858	1/1:0,33:33:96:953,96,0	1/1:0,30:30:66:674,66,0	1/1:0,24:24:51:517,51,0	0/0:42,0:42:99:0,117,1282	0/0:45,0:45:99:0,135,1472	0/0:38,0:39:99:0,105,1179
3	86182007	rs313372259	3:86182007	1/1:0,41:41:99:1123,108,0	1/1:0,33:33:81:818,81,0	1/1:0,33:33:78:811,78,0	0/0:41,1:42:99:0,105,1139	0/0:36,1:37:96:0,96,1028	0/0:47,0:47:99:0,123,1345
3	86407134	rs317529734	3:86407134	1/1:0,20:20:45:468,45,0	1/1:0,28:28:69:758,69,0	1/1:0,38:39:99:1019,99,0	0/0:26,0:26:78:0,78,823	0/0:38,0:38:99:0,102,1102	0/0:28,0:28:81:0,81,853
3	86407241	rs15418147	3:86407241	0/0:32,0:34:84:0,84,884	0/0:22,0:22:54:0,54,530	0/0:45,0:48:99:0,114,1208	1/1:0,34:34:81:868,81,0	1/1:0,37:37:99:1080,105,0	1/1:0,46:46:99:1423,132,0
3	86493572	rs312895946	3:86493572	0/0:44,0:45:99:0,129,1324	0/0:36,0:36:93:0,93,960	0/0:28,0:28:72:0,72,769	1/1:0,34:34:84:845,84,0	1/1:0,43:43:99:1238,123,0	1/1:0,36:36:84:812,84,0
3	86493581	rs313482294	3:86493581	0/0:42,0:43:99:0,105,1096	0/0:35,0:37:93:0,93,944	0/0:30,0:30:75:0,75,784	1/1:0,33:33:84:932,84,0	1/1:0,42:43:99:1181,111,0	1/1:0,36:36:93:1007,93,0
3	87730555	rs317504098	3:87730555	0/0:31,0:31:75:0,75,811	0/0:28,0:28:81:0,81,825	0/0:35,0:35:90:0,90,940	1/1:0,42:42:99:1246,114,0	1/1:0,58:58:99:1667,153,0	1/1:0,47:48:99:1151,105,0
3	87730752	rs318020473	3:87730752	1/1:0,26:26:78:828,78,0	1/1:0,31:31:87:917,87,0	1/1:0,29:29:75:760,75,0	0/0:35,0:35:90:0,90,900	0/0:41,0:41:99:0,108,1130	0/0:42,0:42:99:0,114,1150
3	87731120	rs14392261	3:87731120	0/0:29,1:30:81:0,81,849	0/0:26,1:27:69:0,69,738	0/0:36,2:38:99:0,99,1019	1/1:0,42:42:99:956,99,0	1/1:0,29:29:78:765,78,0	1/1:0,38:39:99:932,99,0
3	87734851	rs315482070	3:87734851	0/0:31,0:31:87:0,87,907	0/0:37,0:37:99:0,99,1055	0/0:40,0:40:99:0,108,1130	1/1:0,44:45:99:1096,117,0	1/1:0,27:27:75:744,75,0	1/1:0,44:45:99:965,105,0
3	90581622	rs317683826	3:90581622	0/0:42,1:43:99:0,105,1005	0/0:18,0:19:39:0,39,388	0/0:26,0:26:54:0,54,508	1/1:0,47:47:99:1355,129,0	1/1:0,38:38:99:1152,105,0	1/1:0,38:39:99:1064,99,0
3	90581631	rs316470846	3:90581631	0/0:40,0:40:99:0,99,1078	0/0:20,0:21:51:0,51,538	0/0:25,0:25:72:0,72,757	1/1:0,45:45:99:1001,108,0	1/1:0,37:37:93:882,93,0	1/1:0,39:39:99:957,102,0
3	90582521	rs317389844	3:90582521	0/0:32,0:34:81:0,81,835	0/0:23,0:24:51:0,51,526	0/0:32,0:34:81:0,81,835	1/1:0,54:55:99:1533,147,0	1/1:0,44:44:99:1296,123,0	1/1:1,34:35:73:981,73,0
3	90583629	rs741498977	3:90583629	0/0:30,0:32:81:0,81,865	0/0:24,0:24:66:0,66,706	0/0:38,0:39:96:0,96,1007	1/1:0,33:33:81:780,81,0	1/1:0,54:54:99:1395,141,0	1/1:0,33:33:87:837,87,0
3	95445800	rs15434436	3:95445800	1/1:0,34:34:84:815,84,0	1/1:0,30:30:63:605,63,0	1/1:0,33:33:75:752,75,0	0/0:31,0:31:84:0,84,912	0/0:28,0:28:78:0,78,832	0/0:36,0:36:96:0,96,1050
3	95446427	rs313181648	3:95446427	1/1:0,30:30:81:829,81,0	1/1:0,29:31:75:780,75,0	1/1:0,29:30:75:751,75,0	0/0:43,0:43:99:0,117,1241	0/0:43,0:44:99:0,120,1266	0/0:35,0:35:99:0,99,1051
3	95764355	rs10730266	3:95764355	0/0:43,0:43:99:0,108,1116	0/0:32,0:32:72:0,72,766	0/0:28,0:28:75:0,75,793	1/1:0,45:45:99:1133,117,0	1/1:0,47:47:99:1135,117,0	1/1:0,33:34:84:819,84,0
3	95770262	rs312411204	3:95770262	1/1:0,37:39:90:934,90,0	1/1:0,39:40:99:1038,99,0	1/1:1,30:31:75:792,75,0	0/0:46,0:46:99:0,123,1183	0/0:50,0:50:99:0,126,1215	0/0:42,0:42:93:0,93,903
3	95770875	rs16327262	3:95770875	1/1:0,27:27:57:509,57,0	1/1:1,37:38:84:760,84,0	1/1:0,31:31:60:555,60,0	0/0:23,0:23:66:0,66,608	0/0:59,0:59:99:0,144,1432	0/0:39,0:39:99:0,102,986
3	95774811	rs10726748	3:95774811	1/1:0,46:46:99:1276,123,0	1/1:0,29:30:69:707,69,0	1/1:0,33:34:84:853,84,0	0/0:44,0:44:99:0,117,1154	0/0:48,0:48:99:0,132,1331	0/0:44,0:44:93:0,93,931
3	95785123	rs312512380	3:95785123	1/1:0,31:31:72:774,72,0	1/1:0,25:25:57:586,57,0	1/1:0,24:24:60:642,60,0	0/0:43,0:44:99:0,114,1086	0/0:47,0:48:99:0,120,1158	0/0:31,0:32:81:0,81,748
3	95785139	rs739019010	3:95785139	1/1:0,32:32:63:651,63,0	1/1:0,26:26:57:603,57,0	1/1:0,26:26:60:622,60,0	0/0:44,0:44:99:0,117,1278	0/0:45,0:45:99:0,117,1237	0/0:34,0:34:81:0,81,885
3	95792714	rs313819172	3:95792714	1/1:0,38:38:93:940,93,0	1/1:0,33:33:78:747,78,0	1/1:0,46:47:99:1270,126,0	0/0:46,0:46:99:0,132,1386	0/0:47,0:47:99:0,132,1444	0/0:49,0:49:99:0,135,1443
3	96025527	rs15435942	3:96025527	1/1:0,33:34:63:578,63,0	1/1:0,34:34:72:674,72,0	1/1:0,35:35:63:609,63,0	0/0:27,0:27:75:0,75,839	0/0:35,0:35:93:0,93,1039	0/0:39,0:40:99:0,102,1118
3	96027569	rs313477995	3:96027569	0/0:28,0:29:69:0,69,701	0/0:22,0:22:54:0,54,527	0/0:25,0:26:54:0,54,549	1/1:0,41:43:93:957,93,0	1/1:0,37:37:87:910,87,0	1/1:1,33:35:81:851,81,0
3	96056239	rs316662644	3:96056239	0/0:18,1:20:27:0,27,262	0/0:26,0:26:45:0,45,453	0/0:19,0:22:33:0,33,345	1/1:0,39:39:96:1005,96,0	1/1:0,21:22:51:554,51,0	1/1:0,13:14:30:332,30,0
3	97041901	rs313743222	3:97041901	1/1:1,33:34:53:749,53,0	1/1:1,34:36:59:853,59,0	1/1:0,33:33:75:767,75,0	0/0:45,0:46:99:0,126,1369	0/0:42,0:42:99:0,111,1197	0/0:49,0:49:99:0,123,1332
3	97042485	rs315155963	3:97042485	1/1:0,25:26:60:623,60,0	1/1:1,29:32:54:852,54,0	1/1:0,42:43:99:1071,102,0	0/0:30,0:30:87:0,87,933	0/0:37,0:38:90:0,90,963	0/0:49,0:51:99:0,132,1394
3	105024129	rs16338463	3:105024129	1/1:0,23:27:45:455,45,0	1/1:0,20:21:48:509,48,0	1/1:0,37:37:87:913,87,0	0/0:34,0:34:90:0,90,940	0/0:49,0:49:99:0,135,1384	0/0:33,0:34:84:0,84,823
3	105024613	rs16338466	3:105024613	1/1:0,32:32:78:794,78,0	1/1:0,30:30:72:717,72,0	1/1:0,38:38:99:1033,99,0	0/0:34,0:34:93:0,93,979	0/0:33,0:33:93:0,93,1005	0/0:29,0:29:81:0,81,885
3	105064010	rs16338518	3:105064010	1/1:0,39:39:96:956,96,0	1/1:0,31:32:63:586,63,0	1/1:0,27:27:66:631,66,0	0/0:38,0:38:99:0,99,1077	0/0:35,0:37:93:0,93,1019	0/0:40,0:41:99:0,102,1092
3	105069525	rs734924999	3:105069525	0/0:26,0:26:57:0,57,569	0/0:20,0:20:42:0,42,393	0/0:23,1:26:54:0,54,518	1/1:1,19:20:51:552,51,0	1/1:0,26:26:75:813,75,0	1/1:0,28:28:75:794,75,0
3	105070097	rs313018002	3:105070097	0/0:14,0:15:42:0,42,446	0/0:32,0:32:72:0,72,726	0/0:40,0:40:96:0,96,982	1/1:0,28:28:78:799,78,0	1/1:0,32:32:87:903,87,0	1/1:0,25:25:66:698,66,0
3	105070143	rs313214538	3:105070143	0/0:18,0:18:48:0,48,502	0/0:31,0:31:72:0,72,731	0/0:28,0:29:78:0,78,805	1/1:0,32:33:90:948,90,0	1/1:0,32:32:90:975,90,0	1/1:0,19:19:48:524,48,0
3	105070154	rs318060071	3:105070154	0/0:19,0:19:48:0,48,492	0/0:34,0:35:90:0,90,912	0/0:25,0:25:60:0,60,625	1/1:0,35:36:96:983,96,0	1/1:0,34:35:90:924,90,0	1/1:0,19:19:51:549,51,0
3	105070366	rs315202832	3:105070366	0/0:19,0:19:51:0,51,474	0/0:27,0:28:45:0,45,406	0/0:22,0:23:51:0,51,456	1/1:0,22:22:42:443,42,0	1/1:0,26:27:57:621,57,0	1/1:0,20:20:45:493,45,0
3	105070514	rs738242959	3:105070514	1/1:1,14:16:27:263,27,0	1/1:0,18:18:39:416,39,0	1/1:1,16:17:39:397,39,0	0/0:27,0:27:66:0,66,625	0/0:27,0:27:66:0,66,627	0/0:18,0:18:45:0,45,420
3	105081669	rs16338563	3:105081669	1/1:0,31:31:60:580,60,0	1/1:0,30:30:63:556,63,0	1/1:0,30:31:60:566,60,0	0/0:30,0:31:75:0,75,823	0/0:35,0:36:99:0,99,1100	0/0:30,0:31:78:0,78,833
3	105082738	rs734670170	3:105082738	0/0:23,0:24:48:0,48,442	0/0:21,0:21:39:0,39,372	0/0:22,0:22:54:0,54,495	1/1:0,26:27:75:813,75,0	1/1:0,39:40:99:1080,99,0	1/1:0,27:27:72:785,72,0
3	105083046	rs314076105	3:105083046	0/0:18,0:18:30:0,30,290	0/0:25,0:25:54:0,54,517	0/0:20,0:22:39:0,39,386	1/1:0,22:23:42:461,42,0	1/1:0,36:40:96:1023,96,0	1/1:0,31:32:81:844,81,0
3	105086099	rs14409177	3:105086099	1/1:0,17:19:39:385,39,0	1/1:0,19:19:48:485,48,0	1/1:0,30:31:72:712,72,0	0/0:34,0:39:81:0,81,863	0/0:39,0:41:93:0,93,996	0/0:28,0:30:66:0,66,707
3	105086177	rs14409179	3:105086177	0/0:27,0:29:69:0,69,722	0/0:29,0:29:66:0,66,663	0/0:24,0:26:45:0,45,458	1/1:0,33:33:84:866,84,0	1/1:0,46:46:99:1126,114,0	1/1:0,18:18:51:511,51,0
3	105086180	rs741673419	3:105086180	0/0:28,0:29:51:0,51,508	0/0:26,0:26:57:0,57,553	0/0:25,0:27:51:0,51,491	1/1:0,30:32:69:717,69,0	1/1:0,46:46:99:1035,99,0	1/1:0,16:18:36:383,36,0
3	105086877	rs733639029	3:105086877	0/0:36,0:36:87:0,87,841	0/0:29,0:30:72:0,72,711	0/0:30,0:30:69:0,69,647	1/1:0,37:37:90:935,90,0	1/1:1,48:49:99:1325,123,0	1/1:0,29:29:75:795,75,0
3	105086976	rs317819917	3:105086976	0/0:31,0:31:84:0,84,836	0/0:22,1:23:54:0,54,559	0/0:28,0:28:66:0,66,676	1/1:0,35:35:87:890,87,0	1/1:0,36:36:99:1052,99,0	1/1:0,41:41:99:1148,108,0
3	105087070	rs736149248	3:105087070	0/0:28,0:28:78:0,78,824	0/0:28,0:28:66:0,66,688	0/0:26,0:26:69:0,69,739	1/1:0,37:37:99:954,102,0	1/1:0,30:30:72:660,72,0	1/1:0,31:31:63:575,63,0
3	105087249	rs313500148	3:105087249	0/0:29,0:31:69:0,69,715	0/0:27,0:27:57:0,57,573	0/0:37,0:39:75:0,75,745	1/1:0,35:35:93:892,93,0	1/1:0,41:41:99:999,102,0	1/1:0,27:27:60:598,60,0
3	105090459	rs316512832	3:105090459	0/0:35,0:36:75:0,75,727	0/0:23,0:23:54:0,54,530	0/0:29,0:29:69:0,69,691	1/1:0,37:38:99:1094,102,0	1/1:0,29:29:72:785,72,0	1/1:0,29:29:78:849,78,0
3	105090901	rs731368026	3:105090901	0/0:23,0:23:54:0,54,554	0/0:24,0:26:45:0,45,424	0/0:23,0:25:54:0,54,533	1/1:0,31:32:84:897,84,0	1/1:0,36:37:96:1042,96,0	1/1:0,46:46:99:1297,117,0
3	105090943	rs316843816	3:105090943	0/0:25,0:25:60:0,60,616	0/0:27,0:27:75:0,75,728	0/0:23,0:24:57:0,57,588	1/1:0,26:28:66:695,66,0	1/1:0,36:37:93:927,93,0	1/1:0,39:40:99:1074,99,0
3	106782025	rs312705587	3:106782025	1/1:0,33:34:72:689,72,0	1/1:0,31:32:78:712,78,0	1/1:0,22:22:51:466,51,0	0/0:48,0:48:99:0,132,1432	0/0:45,0:45:99:0,123,1363	0/0:30,0:31:75:0,75,824
3	106782604	rs737377324	3:106782604	0/0:26,0:26:63:0,63,659	0/0:21,0:23:60:0,60,644	0/0:23,0:23:60:0,60,641	1/1:0,27:27:75:807,75,0	1/1:0,47:47:99:1208,114,0	1/1:0,40:41:99:1146,111,0
3	106782697	rs317806559	3:106782697	1/1:0,26:27:63:653,63,0	1/1:0,30:30:72:754,72,0	1/1:0,23:23:66:686,66,0	0/0:28,0:28:69:0,69,655	0/0:25,0:25:63:0,63,622	0/0:39,0:39:93:0,93,893
3	106783923	rs16341082	3:106783923	0/0:30,0:32:69:0,69,745	0/0:20,0:20:45:0,45,468	0/0:21,0:21:45:0,45,491	1/1:0,32:32:93:966,93,0	1/1:0,36:36:99:1084,102,0	1/1:0,46:46:99:1346,126,0
3	109588261	rs314727456	3:109588261	1/1:0,26:27:69:742,69,0	1/1:0,14:14:36:372,36,0	1/1:0,30:31:69:746,69,0	0/0:25,0:26:57:0,57,608	0/0:32,0:32:78:0,78,858	0/0:24,0:25:69:0,69,748
3	109588294	rs314902214	3:109588294	1/1:0,32:33:84:880,84,0	1/1:0,20:20:48:489,48,0	1/1:0,29:29:84:884,84,0	0/0:29,0:29:63:0,63,589	0/0:32,0:32:78:0,78,750	0/0:25,0:25:60:0,60,555
3	110416340	rs740380480	3:110416340	0/0:15,0:15:12:0,12,95	0/0:12,0:12:9:0,9,67	0/0:24,0:24:6:0,6,54	1/1:1,30:31:21:172,21,0	1/1:1,12:13:6:51,6,0	1/1:0,13:13:6:52,6,0
3	110425190	rs312563233	3:110425190	0/0:30,0:30:75:0,75,755	0/0:35,0:35:84:0,84,838	0/0:43,0:44:99:0,108,1108	1/1:0,33:33:96:1000,96,0	1/1:0,32:33:84:897,84,0	1/1:0,32:32:84:895,84,0
3	110427599	rs736450728	3:110427599	0/0:30,0:32:48:0,48,501	0/0:24,0:30:45:0,45,452	0/0:20,0:23:42:0,42,411	1/1:0,26:26:66:661,66,0	1/1:0,38:38:99:1074,105,0	1/1:0,38:38:87:885,87,0
4	343792	rs14418830	4:343792	0/0:34,0:35:93:0,93,952	0/0:35,0:35:93:0,93,907	0/0:35,0:35:90:0,90,930	1/1:0,34:34:87:984,87,0	1/1:0,37:37:96:1052,96,0	1/1:0,36:36:93:1042,93,0
4	343810	rs315985509	4:343810	0/0:37,0:37:93:0,93,959	0/0:34,0:34:81:0,81,866	0/0:34,0:34:84:0,84,870	1/1:1,33:35:52:806,52,0	1/1:0,40:40:99:1131,108,0	1/1:0,40:40:99:1032,99,0
4	344006	rs14418829	4:344006	0/0:29,0:29:87:0,87,841	0/0:33,0:33:75:0,75,716	0/0:27,0:27:66:0,66,630	1/1:0,30:30:87:940,87,0	1/1:0,39:43:87:926,87,0	1/1:0,33:34:75:800,75,0
4	361929	rs316493783	4:361929	0/0:26,0:27:63:0,63,622	0/0:28,0:29:72:0,72,727	0/0:23,0:25:48:0,48,457	1/1:0,16:16:42:439,42,0	1/1:0,28:28:66:719,66,0	1/1:1,25:27:63:662,63,0
4	361953	rs735697551	4:361953	0/0:22,0:22:51:0,51,515	0/0:29,0:29:54:0,54,575	0/0:29,0:29:72:0,72,711	1/1:0,23:23:51:496,51,0	1/1:0,27:27:63:621,63,0	1/1:0,30:31:69:668,69,0
4	361955	rs15473154	4:361955	0/0:21,0:22:54:0,54,538	0/0:28,1:29:66:0,66,669	0/0:30,0:30:69:0,69,694	1/1:0,23:24:51:509,51,0	1/1:0,26:26:57:616,57,0	1/1:0,29:30:69:725,69,0
4	361985	rs15473151	4:361985	0/0:16,2:19:36:0,36,384	0/0:30,0:31:81:0,81,857	0/0:27,1:29:57:0,57,558	1/1:1,30:31:43:617,43,0	1/1:0,27:27:69:667,69,0	1/1:0,30:30:66:622,66,0
4	362301	rs316523294	4:362301	0/0:28,0:28:72:0,72,738	0/0:32,0:33:66:0,66,676	0/0:27,0:28:66:0,66,684	1/1:0,27:27:60:653,60,0	1/1:1,34:35:78:833,78,0	1/1:1,34:36:78:847,78,0
4	527561	rs317939226	4:527561	0/0:36,0:38:87:0,87,805	0/0:27,0:27:54:0,54,494	0/0:30,0:30:72:0,72,673	1/1:0,28:28:81:878,81,0	1/1:0,37:37:99:1104,102,0	1/1:0,36:36:99:1065,99,0
4	529210	rs13546480	4:529210	0/0:26,0:26:63:0,63,572	0/0:25,0:25:57:0,57,556	0/0:25,0:25:57:0,57,534	1/1:0,42:43:99:1253,117,0	1/1:0,51:51:99:1553,141,0	1/1:0,33:33:87:949,87,0
4	529308	rs13546479	4:529308	0/0:40,0:40:87:0,87,838	0/0:29,1:31:81:0,81,776	0/0:29,0:29:69:0,69,659	1/1:0,42:42:99:1214,111,0	1/1:0,40:41:99:1099,102,0	1/1:0,47:47:99:1349,126,0
4	529314	rs13546478	4:529314	0/0:43,0:43:99:0,111,1099	0/0:32,0:32:75:0,75,755	0/0:29,0:29:72:0,72,709	1/1:0,43:43:99:1282,117,0	1/1:0,43:43:99:1199,111,0	1/1:0,44:44:99:1303,120,0
4	529369	rs13546477	4:529369	0/0:43,0:44:99:0,105,1090	0/0:31,0:32:78:0,78,820	0/0:27,0:27:63:0,63,595	1/1:0,43:44:99:1304,120,0	1/1:0,37:37:96:1050,96,0	1/1:0,42:42:99:1150,111,0
4	529370	rs13546476	4:529370	0/0:43,0:44:99:0,108,1133	0/0:31,0:32:78:0,78,816	0/0:26,0:26:66:0,66,659	1/1:0,42:42:99:1205,108,0	1/1:0,37:37:87:934,87,0	1/1:0,43:43:99:1176,114,0
4	529524	rs313704392	4:529524	0/0:29,0:30:72:0,72,657	0/0:25,0:27:54:0,54,497	0/0:24,0:24:45:0,45,410	1/1:0,31:32:81:905,81,0	1/1:0,40:40:99:1136,105,0	1/1:0,34:35:96:1056,96,0
4	529593	rs314034011	4:529593	0/0:30,0:30:54:0,54,498	0/0:26,0:29:36:0,36,330	0/0:23,0:23:45:0,45,405	1/1:0,33:33:87:917,87,0	1/1:0,43:43:99:1199,111,0	1/1:0,33:34:93:1004,93,0
4	529709	rs314561510	4:529709	0/0:29,0:29:69:0,69,721	0/0:25,0:25:63:0,63,672	0/0:33,0:33:84:0,84,887	1/1:0,37:38:90:949,90,0	1/1:0,53:54:99:1441,138,0	1/1:0,45:45:99:1130,108,0
4	529727	rs313098331	4:529727	0/0:30,0:30:60:0,60,603	0/0:26,0:27:54:0,54,543	0/0:29,0:30:75:0,75,780	1/1:0,32:33:81:842,81,0	1/1:0,42:45:99:1178,114,0	1/1:0,52:52:99:1446,141,0
4	529859	rs312399690	4:529859	0/0:27,0:29:51:0,51,494	0/0:21,0:21:39:0,39,365	0/0:27,0:27:57:0,57,564	1/1:1,41:42:99:1145,105,0	1/1:0,33:35:87:973,87,0	1/1:0,30:30:69:754,69,0
4	529946	rs312605340	4:529946	0/0:21,0:24:39:0,39,391	0/0:17,0:20:33:0,33,322	0/0:22,0:22:39:0,39,384	1/1:0,32:35:63:617,63,0	1/1:0,27:31:57:565,57,0	1/1:0,27:30:54:529,54,0
4	530290	rs316530295	4:530290	0/0:23,0:23:54:0,54,476	0/0:28,0:28:51:0,51,457	0/0:26,1:27:19:0,19,405	1/1:0,33:35:78:851,78,0	1/1:0,26:26:60:656,60,0	1/1:0,40:41:93:1001,93,0
4	530393	rs14418728	4:530393	0/0:22,0:22:54:0,54,563	0/0:24,0:24:57:0,57,582	0/0:23,0:24:63:0,63,650	1/1:0,32:32:93:960,93,0	1/1:0,41:41:99:1164,108,0	1/1:0,27:27:63:645,63,0
4	530398	rs318072287	4:530398	0/0:20,0:21:51:0,51,469	0/0:25,0:25:48:0,48,450	0/0:22,0:24:39:0,39,366	1/1:0,31:31:84:912,84,0	1/1:0,42:43:99:1073,99,0	1/1:0,25:26:63:661,63,0
4	530510	rs14418725	4:530510	0/0:31,0:32:84:0,84,870	0/0:34,0:34:78:0,78,800	0/0:41,0:43:96:0,96,1041	1/1:0,39:39:99:1096,102,0	1/1:0,31:32:84:881,84,0	1/1:0,33:33:81:858,81,0
4	530583	rs317203218	4:530583	0/0:34,0:34:84:0,84,877	0/0:24,1:25:57:0,57,576	0/0:43,0:43:99:0,114,1141	1/1:2,38:40:99:1165,108,0	1/1:0,31:31:93:1003,93,0	1/1:0,35:35:93:1009,93,0
4	530812	rs318155553	4:530812	0/0:29,0:29:63:0,63,673	0/0:27,0:28:72:0,72,740	0/0:35,1:36:84:0,84,861	1/1:0,38:38:99:1105,102,0	1/1:0,45:45:99:1238,114,0	1/1:0,31:31:90:993,90,0
4	530916	rs14418724	4:530916	0/0:37,0:37:96:0,96,979	0/0:26,0:28:69:0,69,696	0/0:27,0:27:57:0,57,587	1/1:0,32:32:81:848,81,0	1/1:0,40:40:99:1103,105,0	1/1:0,30:30:87:942,87,0
4	571626	rs733184253	4:571626	0/0:24,0:25:66:0,66,634	0/0:17,0:19:36:0,36,350	0/0:20,0:20:30:0,30,287	1/1:0,25:25:60:670,60,0	1/1:0,23:24:60:638,60,0	1/1:0,22:22:63:692,63,0
4	571662	rs312494991	4:571662	0/0:28,0:29:72:0,72,732	0/0:20,0:21:48:0,48,499	0/0:27,0:27:57:0,57,620	1/1:2,19:21:39:381,39,0	1/1:0,23:23:60:589,60,0	1/1:1,22:23:33:494,33,0
4	572058	rs314857360	4:572058	0/0:44,0:44:99:0,102,1074	0/0:32,0:32:75:0,75,783	0/0:43,0:43:99:0,102,1065	1/1:0,34:34:93:1030,93,0	1/1:0,37:37:99:1142,102,0	1/1:0,29:29:69:751,69,0
4	1791090	rs732399222	4:1791090	0/0:20,0:20:39:0,39,358	0/0:19,0:19:36:0,36,323	0/0:23,0:23:45:0,45,389	1/1:0,28:28:63:678,63,0	1/1:0,36:36:96:1038,96,0	1/1:0,22:23:63:677,63,0
4	1791358	rs15470858	4:1791358	0/0:20,0:21:51:0,51,541	0/0:20,0:20:42:0,42,447	0/0:30,0:30:63:0,63,616	1/1:0,33:34:81:875,81,0	1/1:0,42:43:99:1151,111,0	1/1:0,37:37:99:1027,99,0
4	1792237	rs732620134	4:1792237	0/0:25,0:25:69:0,69,722	0/0:18,0:18:42:0,42,439	0/0:27,0:27:54:0,54,550	1/1:0,26:26:66:713,66,0	1/1:0,38:38:96:1057,96,0	1/1:0,29:30:75:831,75,0
4	1792255	rs731583544	4:1792255	0/0:26,0:26:69:0,69,670	0/0:21,0:21:36:0,36,368	0/0:25,0:27:51:0,51,481	1/1:0,30:31:78:820,78,0	1/1:0,38:39:84:874,84,0	1/1:0,34:35:78:826,78,0
4	1815578	rs731100154	4:1815578	0/0:17,0:17:39:0,39,417	0/0:18,0:19:39:0,39,419	0/0:20,0:20:48:0,48,516	1/1:0,17:17:45:481,45,0	1/1:0,22:22:57:576,57,0	1/1:0,19:19:42:450,42,0
4	1815602	rs739402820	4:1815602	0/0:16,0:17:27:0,27,292	0/0:16,0:17:36:0,36,372	0/0:16,0:16:45:0,45,459	1/1:0,18:18:42:467,42,0	1/1:1,21:22:48:506,48,0	1/1:0,22:23:45:494,45,0
4	2014156	rs16349755	4:2014156	1/1:0,14:14:30:314,30,0	1/1:0,28:28:66:668,66,0	1/1:0,26:27:63:648,63,0	0/0:13,0:13:33:0,33,354	0/0:39,0:43:87:0,87,900	0/0:22,0:24:45:0,45,472
4	2017213	rs316798410	4:2017213	1/1:0,23:23:48:440,48,0	1/1:0,17:17:45:431,45,0	1/1:0,16:17:30:280,30,0	0/0:26,0:26:69:0,69,729	0/0:30,0:31:84:0,84,906	0/0:24,0:24:60:0,60,620
4	2095688	rs315070255	4:2095688	1/1:0,27:29:60:580,60,0	1/1:0,26:26:54:530,54,0	1/1:0,16:16:36:352,36,0	0/0:39,0:39:99:0,111,1156	0/0:40,0:40:99:0,108,1146	0/0:27,0:27:63:0,63,676
4	2100467	rs312404512	4:2100467	1/1:0,23:23:60:620,60,0	1/1:0,30:31:81:849,81,0	1/1:0,28:28:63:655,63,0	0/0:37,0:37:99:0,102,1019	0/0:37,0:37:99:0,99,968	0/0:29,0:29:63:0,63,644
4	2103347	rs10723361	4:2103347	1/1:0,28:29:69:741,69,0	1/1:0,29:30:75:759,75,0	1/1:0,27:27:72:763,72,0	0/0:34,0:34:84:0,84,796	0/0:29,0:29:66:0,66,646	0/0:42,0:42:99:0,117,1097
4	2104541	rs16349919	4:2104541	1/1:0,23:24:39:384,39,0	1/1:0,22:23:42:435,42,0	1/1:0,37:37:84:899,84,0	0/0:34,0:35:69:0,69,733	0/0:53,0:58:99:0,120,1266	0/0:42,0:42:99:0,99,1051
4	2104548	rs312631188	4:2104548	1/1:0,24:24:39:349,39,0	1/1:0,24:25:54:499,54,0	1/1:0,39:39:87:812,87,0	0/0:34,0:34:81:0,81,887	0/0:56,0:58:99:0,135,1447	0/0:40,0:41:93:0,93,1025
4	2105264	rs313369968	4:2105264	1/1:0,19:20:39:396,39,0	1/1:0,23:23:48:479,48,0	1/1:0,22:23:45:462,45,0	0/0:35,0:35:93:0,93,1007	0/0:31,0:31:87:0,87,946	0/0:38,0:39:90:0,90,955
4	3750698	rs13641323	4:3750698	0/0:22,0:22:39:0,39,401	0/0:26,0:27:60:0,60,591	0/0:31,0:31:72:0,72,783	1/1:0,25:25:66:632,66,0	1/1:0,36:36:99:937,99,0	1/1:0,38:38:81:802,81,0
4	3750740	rs10731107	4:3750740	1/1:0,29:29:72:748,72,0	1/1:0,24:25:51:569,51,0	1/1:0,29:30:69:739,69,0	0/0:28,0:28:78:0,78,839	0/0:37,0:37:99:0,105,1106	0/0:41,0:41:99:0,111,1185
4	3751994	rs314709259	4:3751994	1/1:0,13:13:30:301,30,0	1/1:0,28:28:60:552,60,0	1/1:0,22:23:39:369,39,0	0/0:30,0:30:81:0,81,860	0/0:28,0:28:72:0,72,765	0/0:35,0:35:96:0,96,1017
4	5141216	rs314149835	4:5141216	0/0:29,0:29:66:0,66,637	0/0:28,0:29:75:0,75,751	0/0:18,1:19:42:0,42,404	1/1:0,38:38:81:825,81,0	1/1:1,48:49:99:1020,102,0	1/1:1,37:38:81:835,81,0
4	5141233	rs15481730	4:5141233	0/0:27,0:27:63:0,63,634	0/0:26,0:27:63:0,63,658	0/0:20,0:21:48:0,48,478	1/1:0,35:35:81:807,81,0	1/1:0,46:49:99:1150,114,0	1/1:0,33:33:66:632,66,0
4	5144322	rs313237661	4:5144322	1/1:0,29:30:57:515,57,0	1/1:0,26:26:66:612,66,0	1/1:0,30:31:72:665,72,0	0/0:39,0:39:99:0,99,1071	0/0:23,0:23:54:0,54,564	0/0:28,0:29:72:0,72,760
4	5145180	rs317531504	4:5145180	1/1:0,35:35:90:846,90,0	1/1:0,32:33:78:756,78,0	1/1:0,27:27:69:653,69,0	0/0:33,0:35:81:0,81,860	0/0:31,0:31:84:0,84,865	0/0:29,0:30:69:0,69,732
4	5145364	rs315733912	4:5145364	0/0:31,0:33:54:0,54,483	0/0:27,0:28:48:0,48,425	0/0:28,0:28:54:0,54,483	1/1:0,23:23:66:721,66,0	1/1:0,37:37:87:947,87,0	1/1:0,31:32:78:859,78,0
4	5145848	rs317004903	4:5145848	0/0:18,0:18:39:0,39,414	0/0:27,0:28:75:0,75,790	0/0:21,0:21:51:0,51,521	1/1:0,23:23:60:587,60,0	1/1:0,37:37:96:971,96,0	1/1:0,30:30:87:850,87,0
4	5146193	rs317743001	4:5146193	0/0:21,0:22:57:0,57,608	0/0:26,0:26:63:0,63,695	0/0:25,0:26:63:0,63,693	1/1:0,24:24:63:597,63,0	1/1:0,40:40:96:943,96,0	1/1:0,39:39:96:925,96,0
4	9324259	rs739827397	4:9324259	1/1:0,48:51:99:1276,120,0	1/1:0,38:38:99:1082,105,0	1/1:0,44:44:99:1193,114,0	0/0:47,0:47:99:0,126,1392	0/0:43,0:43:99:0,108,1186	0/0:42,0:42:99:0,117,1290
4	9325278	rs313615354	4:9325278	1/1:0,33:33:60:570,60,0	1/1:0,34:35:72:672,72,0	1/1:0,35:36:81:768,81,0	0/0:48,0:48:99:0,132,1434	0/0:48,0:49:99:0,126,1366	0/0:45,0:45:99:0,120,1303
4	9410395	rs318041844	4:9410395	0/0:37,0:37:84:0,84,883	0/0:21,0:22:57:0,57,619	0/0:28,0:29:66:0,66,699	1/1:0,34:35:96:895,96,0	1/1:0,39:39:99:950,99,0	1/1:0,37:37:96:877,96,0
4	9418886	rs313217559	4:9418886	1/1:0,34:35:72:733,72,0	1/1:0,23:23:60:613,60,0	1/1:0,27:27:72:759,72,0	0/0:45,0:46:99:0,117,1118	0/0:34,0:35:90:0,90,884	0/0:46,0:46:99:0,108,1042
4	9420505	rs316693208	4:9420505	1/1:0,41:42:99:1041,99,0	1/1:1,35:36:84:847,84,0	1/1:0,37:38:87:890,87,0	0/0:52,0:52:99:0,144,1495	0/0:45,0:45:99:0,120,1334	0/0:41,0:41:99:0,108,1195
4	9427733	rs14426637	4:9427733	1/1:0,42:44:96:855,96,0	1/1:0,34:34:48:409,48,0	1/1:0,45:45:96:834,96,0	0/0:42,0:42:99:0,114,1223	0/0:56,0:56:99:0,144,1542	0/0:30,0:31:81:0,81,889
4	16457602	rs317661222	4:16457602	1/1:0,40:40:96:989,96,0	1/1:0,31:32:66:686,66,0	1/1:1,32:34:66:719,66,0	0/0:41,0:42:99:0,99,968	0/0:33,0:33:84:0,84,797	0/0:44,0:45:99:0,111,1048
4	16457618	rs29008751	4:16457618	0/0:43,0:44:99:0,102,1039	0/0:30,0:30:66:0,66,681	0/0:34,0:34:75:0,75,775	1/1:0,42:42:99:1251,114,0	1/1:0,40:40:99:1129,102,0	1/1:0,42:43:99:1243,114,0
4	41696595	rs313830929	4:41696595	1/1:0,25:25:45:428,45,0	1/1:0,27:27:60:582,60,0	1/1:0,28:33:66:621,66,0	0/0:39,0:39:99:0,102,1077	0/0:40,0:40:99:0,105,1141	0/0:40,1:41:93:0,93,998
4	41696614	rs312921131	4:41696614	1/1:0,34:34:84:784,84,0	1/1:0,26:27:51:506,51,0	1/1:0,35:37:78:752,78,0	0/0:41,0:42:99:0,111,1181	0/0:41,0:43:99:0,99,1054	0/0:39,0:39:84:0,84,876
4	41696632	rs315171548	4:41696632	1/1:0,38:39:75:725,75,0	1/1:0,27:27:45:479,45,0	1/1:0,32:32:69:680,69,0	0/0:38,0:39:99:0,99,1050	0/0:44,0:44:99:0,108,1164	0/0:34,0:34:75:0,75,790
4	41696646	rs313788243	4:41696646	1/1:0,40:40:75:665,75,0	1/1:0,27:28:42:401,42,0	1/1:0,34:34:66:581,66,0	0/0:40,0:41:99:0,108,1160	0/0:43,0:44:96:0,96,1001	0/0:31,0:32:78:0,78,813
4	41701090	rs736697087	4:41701090	1/1:0,36:36:87:764,87,0	1/1:0,26:27:54:490,54,0	1/1:0,29:30:54:488,54,0	0/0:35,1:36:93:0,93,961	0/0:30,0:31:60:0,60,649	0/0:29,0:31:60:0,60,614
4	41701101	rs741573682	4:41701101	1/1:0,36:36:72:683,72,0	1/1:0,24:24:63:600,63,0	1/1:0,33:35:78:738,78,0	0/0:34,0:34:90:0,90,954	0/0:30,0:30:69:0,69,727	0/0:27,0:28:60:0,60,641
4	41701183	rs16396780	4:41701183	0/0:23,0:23:51:0,51,513	0/0:23,0:23:60:0,60,598	0/0:28,0:29:57:0,57,546	1/1:0,30:32:60:599,60,0	1/1:0,27:27:66:683,66,0	1/1:0,33:34:75:744,75,0
4	52977114	rs316482606	4:52977114	1/1:0,27:27:60:601,60,0	1/1:0,25:26:66:666,66,0	1/1:0,31:32:75:716,75,0	0/0:35,0:35:96:0,96,1003	0/0:48,0:48:99:0,126,1324	0/0:37,0:38:99:0,99,1024
4	52977157	rs317216005	4:52977157	1/1:0,20:21:48:507,48,0	1/1:0,26:27:69:722,69,0	1/1:0,28:29:66:671,66,0	0/0:35,0:35:96:0,96,1004	0/0:36,0:36:93:0,93,1024	0/0:37,0:37:93:0,93,1015
4	52977171	rs739549868	4:52977171	1/1:0,23:24:60:575,60,0	1/1:0,25:26:66:695,66,0	1/1:0,25:25:60:642,60,0	0/0:30,0:30:78:0,78,810	0/0:40,0:40:99:0,114,1223	0/0:40,0:40:99:0,108,1074
4	56421678	rs13523558	4:56421678	0/0:28,0:29:72:0,72,747	0/0:24,0:25:60:0,60,609	0/0:19,0:20:42:0,42,424	1/1:0,25:25:63:573,63,0	1/1:0,29:29:75:717,75,0	1/1:0,23:23:51:492,51,0
4	56430806	rs312365017	4:56430806	1/1:0,32:33:81:821,81,0	1/1:0,20:20:39:384,39,0	1/1:0,27:28:63:660,63,0	0/0:41,0:43:99:0,99,1079	0/0:32,0:34:78:0,78,856	0/0:33,0:33:90:0,90,956
4	56432344	rs16417229	4:56432344	0/0:22,0:25:39:0,39,404	0/0:31,0:31:78:0,78,805	0/0:37,0:38:75:0,75,793	1/1:0,34:35:81:758,81,0	1/1:0,34:34:75:718,75,0	1/1:0,43:44:96:988,96,0
4	56432353	rs16417230	4:56432353	0/0:27,0:27:63:0,63,605	0/0:29,0:29:60:0,60,585	0/0:38,0:38:81:0,81,798	1/1:0,34:37:75:779,75,0	1/1:0,30:31:66:712,66,0	1/1:0,43:44:99:1062,99,0
4	56697940	rs317462182	4:56697940	1/1:0,33:34:90:911,90,0	1/1:0,26:26:54:556,54,0	1/1:0,22:23:54:549,54,0	0/0:27,0:27:66:0,66,698	0/0:31,0:31:87:0,87,944	0/0:39,0:39:99:0,102,1113
4	56707029	rs740581710	4:56707029	1/1:0,21:24:39:424,39,0	1/1:0,20:23:36:374,36,0	1/1:0,20:23:39:396,39,0	0/0:35,0:36:81:0,81,840	0/0:35,0:36:93:0,93,990	0/0:38,0:38:93:0,93,971
4	56707057	rs734380766	4:56707057	1/1:0,27:29:57:574,57,0	1/1:0,22:23:45:469,45,0	1/1:0,21:22:39:393,39,0	0/0:47,0:47:99:0,108,1021	0/0:34,0:34:78:0,78,744	0/0:39,0:40:96:0,96,927
4	64744490	rs739988945	4:64744490	1/1:0,19:19:45:441,45,0	1/1:0,17:17:36:351,36,0	1/1:0,25:25:63:615,63,0	0/0:25,0:28:63:0,63,662	0/0:24,0:25:39:0,39,414	0/0:26,0:26:42:0,42,433
4	64744610	rs732269152	4:64744610	0/0:29,0:30:63:0,63,560	0/0:24,1:25:22:0,22,359	0/0:24,0:24:36:0,36,325	1/1:0,30:30:66:602,66,0	1/1:0,36:37:81:758,81,0	1/1:0,32:32:69:630,69,0
4	68650201	rs315071431	4:68650201	0/0:26,0:26:69:0,69,725	0/0:32,0:32:75:0,75,798	0/0:36,0:36:87:0,87,867	1/1:0,41:41:99:1103,102,0	1/1:2,43:46:99:1066,102,0	1/1:0,38:38:99:1094,99,0
4	68651571	rs313648674	4:68651571	0/0:24,0:24:63:0,63,610	0/0:30,0:30:75:0,75,801	0/0:34,0:34:81:0,81,843	1/1:0,41:41:99:1113,105,0	1/1:0,45:46:99:1231,117,0	1/1:0,34:34:96:1019,96,0
4	68651654	rs315317730	4:68651654	0/0:43,0:43:99:0,117,1244	0/0:22,0:23:48:0,48,515	0/0:36,0:36:84:0,84,845	1/1:0,47:47:99:1323,126,0	1/1:0,44:45:99:1094,105,0	1/1:0,43:45:99:1171,114,0
4	68652115	rs740247245	4:68652115	0/0:29,0:29:72:0,72,745	0/0:30,0:33:66:0,66,651	0/0:31,0:31:81:0,81,826	1/1:0,38:38:99:1057,99,0	1/1:1,40:41:90:1203,90,0	1/1:0,45:45:99:1270,120,0
4	68652495	rs315457377	4:68652495	0/0:37,0:37:72:0,72,633	0/0:17,2:19:39:0,39,345	0/0:40,0:40:87:0,87,791	1/1:0,38:38:99:1121,105,0	1/1:0,40:40:99:1267,114,0	1/1:0,33:33:96:1083,96,0
4	68652526	rs315583182	4:68652526	0/0:38,0:38:99:0,105,1132	0/0:19,0:20:45:0,45,491	0/0:32,0:33:90:0,90,955	1/1:0,35:35:87:804,87,0	1/1:0,34:34:78:742,78,0	1/1:0,34:34:84:818,84,0
4	68652572	rs316120878	4:68652572	0/0:44,0:45:99:0,105,1050	0/0:23,0:23:54:0,54,563	0/0:30,0:31:84:0,84,846	1/1:0,38:38:99:963,99,0	1/1:0,36:36:96:944,96,0	1/1:0,39:40:99:992,102,0
4	68652754	rs316434957	4:68652754	0/0:39,0:40:99:0,99,980	0/0:34,0:34:81:0,81,792	0/0:30,0:31:78:0,78,777	1/1:0,34:34:96:1032,96,0	1/1:0,46:46:99:1378,129,0	1/1:0,35:36:81:879,81,0
4	68652831	rs317037625	4:68652831	0/0:41,0:41:99:0,102,1072	0/0:26,0:27:69:0,69,730	0/0:41,0:41:99:0,111,1148	1/1:0,34:34:87:837,87,0	1/1:0,43:43:99:1045,108,0	1/1:0,38:38:99:1012,102,0
4	68652867	rs316559759	4:68652867	0/0:38,1:40:90:0,90,947	0/0:23,0:24:57:0,57,563	0/0:39,0:40:90:0,90,914	1/1:0,42:42:99:1270,120,0	1/1:0,37:37:99:1083,102,0	1/1:0,35:35:96:1020,96,0
4	68652923	rs317767166	4:68652923	0/0:50,0:50:99:0,132,1376	0/0:17,0:18:45:0,45,475	0/0:37,0:39:90:0,90,959	1/1:0,41:41:99:1161,111,0	1/1:0,38:38:93:1031,93,0	1/1:0,33:33:84:913,84,0
4	68652937	rs317874271	4:68652937	0/0:49,0:50:99:0,129,1352	0/0:18,0:18:45:0,45,467	0/0:35,0:35:96:0,96,996	1/1:0,40:40:96:970,96,0	1/1:1,32:34:84:835,84,0	1/1:0,35:35:93:907,93,0
4	68653060	rs317412482	4:68653060	0/0:32,0:32:78:0,78,830	0/0:36,0:36:96:0,96,1046	0/0:23,0:23:60:0,60,643	1/1:0,44:44:99:1021,108,0	1/1:0,44:44:96:924,96,0	1/1:0,44:44:99:920,99,0
4	68653069	rs313093710	4:68653069	0/0:33,0:33:87:0,87,931	0/0:44,0:44:99:0,117,1260	0/0:22,0:22:51:0,51,575	1/1:0,43:43:99:1103,114,0	1/1:1,46:47:83:1025,83,0	1/1:0,48:48:99:1201,129,0
4	68653103	rs312321243	4:68653103	0/0:29,0:29:69:0,69,719	0/0:34,0:34:84:0,84,855	0/0:27,0:30:72:0,72,763	1/1:0,52:53:99:1309,123,0	1/1:0,45:46:99:1212,114,0	1/1:0,42:42:99:1119,108,0
4	68653192	rs312461237	4:68653192	0/0:39,1:40:96:0,96,1002	0/0:39,0:39:99:0,99,1040	0/0:45,0:45:99:0,105,1142	1/1:0,35:35:99:1085,99,0	1/1:0,41:41:99:1294,117,0	1/1:1,51:52:99:1589,147,0
4	68654630	rs16432300	4:68654630	0/0:43,0:43:99:0,114,1169	0/0:34,0:34:78:0,78,787	0/0:37,0:37:90:0,90,910	1/1:0,37:37:99:1162,111,0	1/1:0,55:55:99:1677,153,0	1/1:0,47:47:99:1458,138,0
4	68654644	rs16432301	4:68654644	0/0:41,0:41:99:0,114,1159	0/0:33,0:33:78:0,78,806	0/0:37,0:39:96:0,96,983	1/1:0,35:35:96:1035,96,0	1/1:0,54:54:99:1658,153,0	1/1:0,45:45:99:1359,126,0
4	69141857	rs313420329	4:69141857	1/1:0,31:31:84:846,84,0	1/1:0,35:37:87:874,87,0	1/1:0,41:41:99:1161,111,0	0/0:48,0:49:99:0,117,1217	0/0:37,0:37:99:0,102,1099	0/0:40,0:40:99:0,120,1270
4	69141872	rs734723794	4:69141872	1/1:0,30:31:72:759,72,0	1/1:0,37:37:93:943,93,0	1/1:0,41:41:99:1147,114,0	0/0:45,0:45:99:0,123,1294	0/0:37,0:37:99:0,102,1096	0/0:40,0:41:99:0,114,1237
4	69142400	.	4:69142400	1/1:0,35:35:78:770,78,0	1/1:0,35:36:81:855,81,0	1/1:0,30:30:78:779,78,0	0/0:43,0:43:99:0,102,983	0/0:30,0:30:81:0,81,774	0/0:45,0:45:99:0,114,1122
4	69142484	.	4:69142484	1/1:0,24:24:45:424,45,0	1/1:0,31:31:45:453,45,0	1/1:0,25:25:51:498,51,0	0/0:37,4:41:87:0,87,854	0/0:30,3:33:53:0,53,819	0/0:37,2:40:84:0,84,896
4	69524905	rs16432888	4:69524905	1/1:0,34:34:60:564,60,0	1/1:0,14:15:27:243,27,0	1/1:0,18:21:36:365,36,0	0/0:35,0:35:69:0,69,757	0/0:32,0:33:63:0,63,661	0/0:19,0:19:48:0,48,516
4	69530283	rs16432890	4:69530283	1/1:0,44:44:99:1180,111,0	1/1:0,26:27:57:589,57,0	1/1:0,28:30:51:524,51,0	0/0:32,0:32:93:0,93,1034	0/0:35,0:35:96:0,96,1093	0/0:48,0:48:99:0,126,1410
4	74052328	rs15618063	4:74052328	0/0:19,0:21:39:0,39,412	0/0:31,0:33:81:0,81,854	0/0:27,0:28:69:0,69,677	1/1:0,42:42:99:1012,114,0	1/1:0,43:43:99:942,102,0	1/1:0,36:36:87:801,87,0
4	74071089	rs313658975	4:74071089	0/0:42,1:43:99:0,108,1097	0/0:33,0:34:81:0,81,792	0/0:32,0:32:75:0,75,763	1/1:0,31:32:78:783,78,0	1/1:0,45:46:99:1170,114,0	1/1:0,36:36:99:1093,105,0
4	74071114	rs315003582	4:74071114	0/0:42,0:43:99:0,111,1137	0/0:31,0:33:63:0,63,652	0/0:32,0:34:78:0,78,828	1/1:0,29:30:78:819,78,0	1/1:0,47:49:99:1277,120,0	1/1:0,37:37:99:1143,105,0
4	74071132	rs315080338	4:74071132	0/0:38,0:39:99:0,102,1061	0/0:30,0:30:60:0,60,633	0/0:36,0:37:84:0,84,876	1/1:0,28:29:66:661,66,0	1/1:0,44:47:99:1071,105,0	1/1:0,36:37:90:925,90,0
4	74071146	rs15618103	4:74071146	0/0:41,0:41:99:0,102,1082	0/0:27,0:29:60:0,60,600	0/0:31,2:34:54:0,54,763	1/1:1,19:21:54:566,54,0	1/1:0,43:43:99:1204,111,0	1/1:1,32:33:58:830,58,0
4	80112076	rs16442245	4:80112076	0/0:45,0:45:99:0,102,1024	0/0:23,0:23:57:0,57,573	0/0:34,1:35:81:0,81,823	1/1:1,44:45:99:1286,117,0	1/1:0,39:39:99:1115,99,0	1/1:1,38:39:99:1235,111,0
4	80149902	rs16442316	4:80149902	0/0:36,0:36:90:0,90,898	0/0:21,0:21:54:0,54,535	0/0:35,0:35:96:0,96,958	1/1:0,33:33:81:860,81,0	1/1:0,32:32:84:926,84,0	1/1:0,36:36:90:936,90,0
4	81924618	rs15633271	4:81924618	1/1:1,34:35:93:949,93,0	1/1:0,39:39:99:969,99,0	1/1:0,34:34:87:928,87,0	0/0:31,0:31:72:0,72,776	0/0:45,0:46:99:0,117,1258	0/0:42,0:42:99:0,111,1176
4	81926013	rs16444537	4:81926013	1/1:0,46:48:99:1317,123,0	1/1:0,34:35:75:754,75,0	1/1:0,38:39:96:988,96,0	0/0:28,0:28:81:0,81,883	0/0:47,0:47:99:0,129,1381	0/0:44,0:44:99:0,126,1385
4	81928797	rs14498254	4:81928797	1/1:0,27:27:72:769,72,0	1/1:0,32:32:84:907,84,0	1/1:0,34:34:93:967,93,0	0/0:48,0:48:99:0,135,1484	0/0:57,0:58:99:0,165,1828	0/0:37,0:37:99:0,102,1139
4	88591799	rs734265951	4:88591799	1/1:0,33:33:78:744,78,0	1/1:0,30:30:78:760,78,0	1/1:0,36:36:78:774,78,0	0/0:42,0:42:99:0,102,1123	0/0:52,0:52:99:0,135,1493	0/0:43,0:43:99:0,111,1204
4	88594541	rs15644878	4:88594541	0/0:33,0:34:87:0,87,909	0/0:30,0:31:69:0,69,723	0/0:40,0:40:99:0,102,1054	1/1:0,35:35:93:927,93,0	1/1:0,38:39:93:894,93,0	1/1:0,35:36:87:772,87,0
4	88610593	rs733776536	4:88610593	1/1:0,35:35:87:880,87,0	1/1:0,44:44:99:1123,111,0	1/1:0,41:42:99:1127,111,0	0/0:34,1:35:87:0,87,807	0/0:33,0:33:72:0,72,717	0/0:35,0:35:93:0,93,913
4	88623329	rs314517201	4:88623329	1/1:0,50:52:99:1283,123,0	1/1:0,32:33:78:813,78,0	1/1:0,33:34:90:952,90,0	0/0:30,0:30:78:0,78,770	0/0:46,0:46:99:0,111,1053	0/0:38,0:38:99:0,99,932
4	88733922	rs80743296	4:88733922	0/0:25,0:26:60:0,60,645	0/0:22,0:22:51:0,51,531	0/0:26,0:28:60:0,60,608	1/1:0,29:29:72:744,72,0	1/1:0,34:34:90:918,90,0	1/1:0,33:33:81:835,81,0
4	88759438	rs16452876	4:88759438	0/0:26,0:26:60:0,60,609	0/0:34,1:35:84:0,84,880	0/0:31,0:32:66:0,66,680	1/1:0,39:41:99:1082,105,0	1/1:0,22:24:60:644,60,0	1/1:0,35:35:93:976,93,0
4	89232221	rs734769225	4:89232221	1/1:0,24:24:54:562,54,0	1/1:0,28:32:57:588,57,0	1/1:0,25:25:42:405,42,0	0/0:32,0:32:69:0,69,660	0/0:34,0:34:81:0,81,783	0/0:32,0:32:84:0,84,813
4	89232230	rs738219177	4:89232230	1/1:0,23:24:42:444,42,0	1/1:0,29:30:72:706,72,0	1/1:0,24:25:57:533,57,0	0/0:30,0:31:84:0,84,890	0/0:33,0:33:84:0,84,892	0/0:31,0:31:81:0,81,873
4	89232257	rs315542873	4:89232257	1/1:0,23:23:48:490,48,0	1/1:0,27:27:66:663,66,0	1/1:0,23:23:57:551,57,0	0/0:27,0:27:72:0,72,672	0/0:31,0:31:81:0,81,761	0/0:26,0:26:63:0,63,600
4	89233471	rs741627669	4:89233471	1/1:0,30:31:66:690,66,0	1/1:0,26:27:51:526,51,0	1/1:0,15:15:33:372,33,0	0/0:27,0:27:78:0,78,839	0/0:35,0:35:99:0,102,1111	0/0:48,0:48:99:0,138,1487
4	89234759	rs314015277	4:89234759	1/1:0,33:33:69:732,69,0	1/1:0,22:23:48:523,48,0	1/1:0,19:19:54:564,54,0	0/0:19,0:21:54:0,54,586	0/0:34,0:35:69:0,69,714	0/0:27,0:27:72:0,72,762
4	89270927	rs737526323	4:89270927	1/1:0,23:24:51:508,51,0	1/1:0,22:23:48:491,48,0	1/1:0,21:23:48:508,48,0	0/0:27,0:27:72:0,72,687	0/0:27,0:28:63:0,63,589	0/0:29,0:29:72:0,72,682
4	89276421	rs316026075	4:89276421	0/0:32,0:32:78:0,78,747	0/0:25,0:25:51:0,51,488	0/0:22,0:22:57:0,57,558	1/1:0,25:26:60:646,60,0	1/1:0,28:29:63:709,63,0	1/1:0,25:25:69:756,69,0
4	89276452	rs316635123	4:89276452	0/0:32,0:32:69:0,69,736	0/0:23,0:23:39:0,39,399	0/0:23,0:23:54:0,54,529	1/1:0,26:28:72:775,72,0	1/1:0,28:28:69:777,69,0	1/1:0,24:24:60:646,60,0
4	89276959	rs317261688	4:89276959	1/1:0,23:23:39:388,39,0	1/1:0,15:15:39:393,39,0	1/1:0,38:38:84:853,84,0	0/0:27,0:27:75:0,75,819	0/0:25,0:25:69:0,69,726	0/0:26,0:26:66:0,66,706
4	89277063	rs732352226	4:89277063	1/1:0,27:27:63:664,63,0	1/1:0,13:14:36:376,36,0	1/1:0,40:41:93:939,93,0	0/0:23,0:23:51:0,51,460	0/0:29,0:29:84:0,84,836	0/0:41,2:44:83:0,83,1096
5	11570825	rs734170254	5:11570825	0/0:30,0:31:54:0,54,574	0/0:20,0:20:42:0,42,428	0/0:18,1:21:45:0,45,446	1/1:0,36:36:93:959,93,0	1/1:0,36:36:96:1007,96,0	1/1:0,44:44:99:1142,111,0
5	11570885	rs738990322	5:11570885	0/0:22,0:22:36:0,36,371	0/0:20,0:23:27:0,27,283	0/0:21,0:22:42:0,42,429	1/1:0,33:33:87:916,87,0	1/1:0,34:34:96:1034,96,0	1/1:0,32:32:75:803,75,0
5	11905273	rs314519023	5:11905273	0/0:45,0:47:99:0,117,1185	0/0:33,0:33:87:0,87,930	0/0:37,0:37:93:0,93,953	1/1:0,48:48:99:1419,132,0	1/1:0,39:39:99:1138,105,0	1/1:0,45:45:99:1366,123,0
5	11916868	rs317390574	5:11916868	0/0:20,0:20:51:0,51,459	0/0:12,0:12:30:0,30,271	0/0:15,0:15:27:0,27,245	1/1:0,31:31:90:955,90,0	1/1:0,46:46:99:1284,117,0	1/1:0,32:32:75:810,75,0
5	11916977	rs741223814	5:11916977	0/0:6,0:7:12:0,12,113	0/0:8,0:8:12:0,12,111	0/0:10,0:10:21:0,21,202	1/1:0,31:32:69:724,69,0	1/1:0,36:40:78:822,78,0	1/1:2,28:33:51:525,51,0
5	12395228	rs14516742	5:12395228	1/1:0,22:22:54:567,54,0	1/1:1,36:39:81:871,81,0	1/1:0,31:31:72:756,72,0	0/0:33,0:33:90:0,90,883	0/0:30,0:30:69:0,69,700	0/0:44,0:44:99:0,114,1198
5	12436251	rs317056593	5:12436251	0/0:32,0:33:81:0,81,789	0/0:26,0:26:57:0,57,586	0/0:26,0:28:51:0,51,504	1/1:0,27:27:78:869,78,0	1/1:0,33:33:90:1017,90,0	1/1:0,38:39:99:1185,105,0
5	12610901	rs16468250	5:12610901	1/1:0,28:30:60:623,60,0	1/1:0,23:27:42:459,42,0	1/1:0,19:22:48:525,48,0	0/0:44,0:44:99:0,123,1282	0/0:46,0:46:99:0,117,1234	0/0:33,0:33:96:0,96,1004
5	12611803	rs16468252	5:12611803	1/1:1,31:32:87:889,87,0	1/1:1,27:28:69:683,69,0	1/1:0,23:23:48:514,48,0	0/0:36,1:37:93:0,93,1032	0/0:32,0:33:87:0,87,914	0/0:36,0:36:93:0,93,1037
5	13385919	rs15667686	5:13385919	0/0:29,0:31:60:0,60,568	0/0:26,0:27:51:0,51,473	0/0:25,0:25:66:0,66,651	1/1:0,29:29:72:761,72,0	1/1:0,36:36:90:992,90,0	1/1:0,28:28:84:896,84,0
5	13387746	rs15667688	5:13387746	0/0:30,0:30:69:0,69,625	0/0:23,0:23:36:0,36,328	0/0:32,0:33:69:0,69,642	1/1:0,43:43:99:1309,123,0	1/1:0,49:49:99:1262,117,0	1/1:0,34:34:84:919,84,0
5	18143259	rs741420562	5:18143259	0/0:37,0:38:87:0,87,761	0/0:34,0:34:72:0,72,672	0/0:29,0:29:72:0,72,673	1/1:0,33:33:84:901,84,0	1/1:0,41:41:99:1183,111,0	1/1:0,33:33:93:992,93,0
5	18143295	rs316775588	5:18143295	0/0:32,0:32:75:0,75,670	0/0:36,0:36:90:0,90,859	0/0:31,0:31:72:0,72,688	1/1:0,38:39:99:1033,99,0	1/1:0,45:47:99:1172,111,0	1/1:0,40:41:99:1228,117,0
5	23731383	rs16478539	5:23731383	1/1:0,32:32:54:501,54,0	1/1:0,25:25:54:492,54,0	1/1:0,16:16:27:257,27,0	0/0:23,0:23:57:0,57,614	0/0:34,0:34:84:0,84,890	0/0:25,0:25:69:0,69,736
5	23731384	rs740638902	5:23731384	1/1:1,31:32:72:706,72,0	1/1:1,25:26:51:515,51,0	1/1:1,15:16:21:199,21,0	0/0:23,0:23:60:0,60,659	0/0:33,1:34:58:0,58,861	0/0:25,0:25:63:0,63,668
5	26241425	rs10730960	5:26241425	0/0:32,0:34:78:0,78,735	0/0:21,0:21:45:0,45,453	0/0:26,0:27:69:0,69,644	1/1:0,53:53:99:1461,135,0	1/1:0,39:39:99:1212,111,0	1/1:0,46:47:99:1442,135,0
5	26241730	rs316582163	5:26241730	0/0:36,0:38:90:0,90,835	0/0:29,0:30:75:0,75,678	0/0:30,0:31:69:0,69,631	1/1:0,54:54:99:1566,147,0	1/1:0,34:34:93:1015,93,0	1/1:0,40:40:99:1281,117,0
5	26241775	rs313600545	5:26241775	0/0:38,0:38:87:0,87,880	0/0:27,0:27:63:0,63,642	0/0:34,0:35:69:0,69,735	1/1:0,57:57:99:1589,147,0	1/1:0,37:38:93:981,93,0	1/1:0,44:44:99:1305,120,0
5	26242821	rs317229456	5:26242821	1/1:0,30:31:78:826,78,0	1/1:0,37:39:93:956,93,0	1/1:0,31:34:84:885,84,0	0/0:32,0:32:84:0,84,828	0/0:52,0:54:99:0,132,1342	0/0:39,0:39:99:0,99,998
5	26246846	rs10727884	5:26246846	0/0:23,0:26:60:0,60,611	0/0:31,0:31:69:0,69,680	0/0:40,0:41:99:0,99,1005	1/1:0,48:49:99:1470,138,0	1/1:0,30:31:78:838,78,0	1/1:0,39:39:99:1108,105,0
5	26640363	rs741585612	5:26640363	0/0:28,0:29:69:0,69,687	0/0:33,0:33:87:0,87,927	0/0:38,0:38:99:0,102,1050	1/1:0,58:58:99:1335,138,0	1/1:0,39:40:96:908,96,0	1/1:0,35:35:81:791,81,0
5	26640983	rs315282525	5:26640983	0/0:35,1:36:84:0,84,883	0/0:26,0:26:66:0,66,653	0/0:33,0:34:90:0,90,943	1/1:0,34:36:72:745,72,0	1/1:0,48:49:99:1062,102,0	1/1:0,30:32:75:767,75,0
5	26641238	rs314495422	5:26641238	0/0:36,0:36:78:0,78,710	0/0:30,0:31:63:0,63,581	0/0:40,0:42:99:0,102,948	1/1:0,36:36:99:1157,105,0	1/1:0,49:50:99:1376,126,0	1/1:0,43:43:99:1192,108,0
5	27315270	.	5:27315270	1/1:0,35:35:81:770,81,0	1/1:0,30:31:60:598,60,0	1/1:1,28:31:32:462,32,0	0/0:34,0:34:93:0,93,1001	0/0:40,0:40:99:0,99,1083	0/0:40,0:40:99:0,108,1196
5	27317376	rs15690588	5:27317376	1/1:0,29:30:57:569,57,0	1/1:0,29:29:72:731,72,0	1/1:0,34:34:63:614,63,0	0/0:37,0:37:72:0,72,753	0/0:32,0:33:66:0,66,715	0/0:28,0:29:60:0,60,629
5	28908280	rs15693856	5:28908280	0/0:31,0:31:81:0,81,809	0/0:24,0:24:57:0,57,558	0/0:32,0:32:69:0,69,672	1/1:0,27:28:60:661,60,0	1/1:0,22:24:57:616,57,0	1/1:0,26:28:69:739,69,0
5	28908311	rs316194428	5:28908311	0/0:30,0:30:75:0,75,758	0/0:22,0:24:45:0,45,464	0/0:34,0:35:69:0,69,708	1/1:0,28:29:75:751,75,0	1/1:0,28:28:72:762,72,0	1/1:0,28:28:72:778,72,0
5	34984812	rs313604362	5:34984812	1/1:0,30:30:72:764,72,0	1/1:0,28:28:72:764,72,0	1/1:0,32:33:66:678,66,0	0/0:43,0:44:99:0,123,1313	0/0:40,0:40:99:0,105,1163	0/0:34,0:34:90:0,90,957
5	34988913	rs13585761	5:34988913	1/1:0,25:25:48:475,48,0	1/1:0,27:28:54:520,54,0	1/1:0,33:33:63:594,63,0	0/0:34,0:34:75:0,75,776	0/0:28,0:28:75:0,75,806	0/0:41,0:42:99:0,99,1044
5	35009605	rs16491186	5:35009605	1/1:0,24:24:57:567,57,0	1/1:0,19:20:51:512,51,0	1/1:0,33:33:87:932,87,0	0/0:34,0:35:90:0,90,984	0/0:36,0:37:99:0,105,1122	0/0:43,0:43:99:0,108,1195
5	35281400	rs314203955	5:35281400	0/0:36,0:36:96:0,96,1015	0/0:21,0:21:57:0,57,608	0/0:24,0:24:69:0,69,724	1/1:0,34:34:84:872,84,0	1/1:0,42:42:99:1300,120,0	1/1:0,41:41:99:1230,114,0
5	35299110	rs15700390	5:35299110	1/1:0,33:33:84:768,84,0	1/1:0,19:20:48:458,48,0	1/1:0,39:40:84:781,84,0	0/0:39,0:39:99:0,108,1147	0/0:42,0:42:99:0,108,1213	0/0:39,0:40:99:0,108,1197
5	43082052	rs14540235	5:43082052	0/0:35,0:36:93:0,93,942	0/0:34,0:34:81:0,81,833	0/0:35,0:35:93:0,93,951	1/1:0,44:44:99:1131,105,0	1/1:0,42:42:99:1256,114,0	1/1:0,58:58:99:1787,162,0
5	43082065	rs13588462	5:43082065	0/0:34,0:34:78:0,78,822	0/0:34,0:34:90:0,90,928	0/0:37,0:37:99:0,99,1046	1/1:0,44:44:99:1113,111,0	1/1:0,42:44:99:1098,108,0	1/1:0,51:51:99:1420,138,0
5	43082192	rs13588463	5:43082192	0/0:33,0:33:87:0,87,930	0/0:28,0:28:72:0,72,750	0/0:39,0:39:99:0,105,1116	1/1:0,43:43:93:872,93,0	1/1:0,41:41:96:925,96,0	1/1:0,31:31:78:739,78,0
5	43695543	rs316342943	5:43695543	1/1:0,32:34:63:625,63,0	1/1:0,28:28:69:716,69,0	1/1:0,38:39:87:893,87,0	0/0:47,0:47:99:0,117,1264	0/0:47,0:47:99:0,126,1345	0/0:45,0:45:99:0,120,1260
5	43695677	rs312329101	5:43695677	1/1:0,44:44:99:1193,117,0	1/1:0,30:32:81:840,81,0	1/1:0,34:35:78:821,78,0	0/0:49,0:49:99:0,123,1283	0/0:45,0:45:99:0,126,1358	0/0:48,0:48:99:0,123,1313
5	43695714	rs314449569	5:43695714	1/1:0,36:36:93:987,93,0	1/1:0,28:28:69:752,69,0	1/1:0,27:28:78:835,78,0	0/0:44,0:45:99:0,102,985	0/0:38,0:38:96:0,96,924	0/0:39,0:39:99:0,99,958
5	43707236	rs16501560	5:43707236	1/1:0,25:25:54:483,54,0	1/1:0,17:17:36:330,36,0	1/1:0,33:34:63:566,63,0	0/0:39,0:39:99:0,99,1102	0/0:41,0:42:99:0,99,1107	0/0:20,0:21:60:0,60,663
5	43833682	rs318133647	5:43833682	0/0:29,0:30:54:0,54,560	0/0:28,0:28:78:0,78,749	0/0:37,0:38:75:0,75,761	1/1:0,37:38:93:961,93,0	1/1:1,42:43:99:1172,108,0	1/1:0,46:46:99:1281,120,0
5	43834535	rs315559464	5:43834535	0/0:34,0:35:75:0,75,701	0/0:48,0:48:99:0,126,1195	0/0:36,0:37:93:0,93,857	1/1:0,46:46:99:1416,132,0	1/1:0,40:40:99:1092,102,0	1/1:0,44:44:99:1053,99,0
5	43841631	rs318129626	5:43841631	1/1:1,36:38:87:933,87,0	1/1:0,31:31:84:876,84,0	1/1:0,28:28:69:740,69,0	0/0:42,0:42:99:0,105,1067	0/0:45,0:45:99:0,111,1103	0/0:48,0:48:99:0,120,1166
5	44171341	rs15717235	5:44171341	0/0:29,1:30:66:0,66,670	0/0:16,1:18:24:0,24,240	0/0:24,1:26:57:0,57,568	1/1:0,39:41:99:1081,102,0	1/1:0,41:42:99:1151,105,0	1/1:0,40:40:96:1028,96,0
5	44172439	rs317477639	5:44172439	0/0:24,0:24:45:0,45,405	0/0:20,0:21:42:0,42,386	0/0:26,0:28:39:0,39,359	1/1:1,37:38:79:1165,79,0	1/1:0,28:28:69:734,69,0	1/1:1,31:32:87:951,87,0
5	44172793	rs313158317	5:44172793	0/0:28,0:30:57:0,57,584	0/0:22,0:22:60:0,60,624	0/0:29,0:29:63:0,63,673	1/1:0,41:41:99:1262,120,0	1/1:0,50:50:99:1469,135,0	1/1:0,33:35:93:986,93,0
5	51672763	rs314206656	5:51672763	0/0:20,0:22:51:0,51,512	0/0:16,0:16:39:0,39,417	0/0:24,0:25:60:0,60,606	1/1:0,25:26:60:566,60,0	1/1:0,34:34:81:830,81,0	1/1:0,27:28:69:646,69,0
5	51687472	rs317565159	5:51687472	1/1:2,36:38:69:839,69,0	1/1:0,27:28:63:618,63,0	1/1:0,31:31:81:806,81,0	0/0:28,0:28:72:0,72,780	0/0:31,0:31:78:0,78,841	0/0:41,0:42:99:0,117,1300
5	51687511	rs733129320	5:51687511	1/1:0,40:40:99:1041,102,0	1/1:0,27:28:63:651,63,0	1/1:0,35:35:99:1017,99,0	0/0:35,0:35:87:0,87,906	0/0:32,0:32:84:0,84,829	0/0:37,0:37:90:0,90,893
5	53005206	rs315585699	5:53005206	1/1:0,23:23:60:630,60,0	1/1:1,26:27:78:802,78,0	1/1:0,18:18:45:464,45,0	0/0:29,1:30:72:0,72,779	0/0:31,0:31:78:0,78,840	0/0:39,0:39:87:0,87,927
5	53007066	rs312675692	5:53007066	1/1:0,24:26:63:662,63,0	1/1:0,26:27:69:706,69,0	1/1:0,25:26:66:687,66,0	0/0:43,0:44:99:0,111,1077	0/0:43,0:43:99:0,117,1184	0/0:45,0:45:99:0,114,1134
5	53008531	rs314986749	5:53008531	1/1:0,33:33:81:812,81,0	1/1:0,25:27:63:649,63,0	1/1:0,23:24:54:561,54,0	0/0:41,0:43:99:0,105,1126	0/0:36,0:37:99:0,99,1035	0/0:38,0:38:99:0,105,1132
5	54137959	rs315635028	5:54137959	1/1:0,23:24:42:442,42,0	1/1:0,27:28:75:786,75,0	1/1:0,31:31:72:744,72,0	0/0:47,0:47:99:0,132,1335	0/0:46,0:46:99:0,117,1268	0/0:43,0:43:99:0,117,1234
5	54142372	rs738805266	5:54142372	1/1:0,47:47:99:1274,120,0	1/1:0,39:41:96:1033,96,0	1/1:0,29:29:66:653,66,0	0/0:30,0:31:72:0,72,773	0/0:45,0:45:99:0,114,1249	0/0:37,0:37:99:0,99,1061
5	54142373	rs740748579	5:54142373	1/1:0,47:47:99:1139,111,0	1/1:0,41:41:96:980,96,0	1/1:0,29:29:60:609,60,0	0/0:32,0:32:87:0,87,904	0/0:44,0:45:99:0,120,1327	0/0:36,0:36:99:0,102,1074
5	55085969	rs313456345	5:55085969	1/1:0,30:30:66:677,66,0	1/1:0,22:22:51:525,51,0	1/1:0,28:28:75:766,75,0	0/0:35,0:35:96:0,96,1006	0/0:40,0:40:99:0,102,1084	0/0:30,0:30:72:0,72,748
5	55089283	rs316922928	5:55089283	0/0:25,0:25:54:0,54,572	0/0:39,0:40:90:0,90,961	0/0:29,0:29:72:0,72,754	1/1:0,34:34:90:864,90,0	1/1:0,49:49:99:1217,123,0	1/1:0,45:46:99:1130,120,0
5	55208944	rs731221897	5:55208944	0/0:33,0:33:78:0,78,757	0/0:24,0:24:54:0,54,525	0/0:31,0:32:81:0,81,796	1/1:1,38:41:75:792,75,0	1/1:0,29:30:60:631,60,0	1/1:0,25:27:57:591,57,0
5	55208973	rs317857761	5:55208973	0/0:32,0:32:63:0,63,609	0/0:25,0:26:54:0,54,541	0/0:27,0:27:72:0,72,727	1/1:0,30:30:75:783,75,0	1/1:0,30:30:75:783,75,0	1/1:0,29:29:75:771,75,0
5	55209227	rs15740068	5:55209227	0/0:26,1:27:63:0,63,620	0/0:28,0:28:63:0,63,594	0/0:25,0:25:48:0,48,455	1/1:1,38:39:93:910,93,0	1/1:0,34:34:84:827,84,0	1/1:0,28:29:69:647,69,0
5	55209848	rs316328065	5:55209848	0/0:19,0:20:36:0,36,348	0/0:20,0:21:45:0,45,453	0/0:19,0:19:48:0,48,498	1/1:0,23:23:54:610,54,0	1/1:1,41:42:99:1096,99,0	1/1:0,26:27:78:822,78,0
5	55209919	rs316957301	5:55209919	0/0:25,0:25:63:0,63,637	0/0:18,0:22:36:0,36,364	0/0:26,0:28:63:0,63,648	1/1:0,35:36:93:931,93,0	1/1:0,32:32:84:844,84,0	1/1:0,33:33:87:895,87,0
5	55211620	rs733001598	5:55211620	0/0:24,0:25:45:0,45,428	0/0:15,0:15:33:0,33,337	0/0:23,0:24:48:0,48,453	1/1:0,26:27:60:640,60,0	1/1:0,25:25:66:676,66,0	1/1:0,35:35:75:783,75,0
5	57564267	rs15745797	5:57564267	0/0:32,0:33:75:0,75,685	0/0:24,0:24:63:0,63,583	0/0:34,0:35:78:0,78,705	1/1:0,32:32:93:1019,93,0	1/1:0,40:40:99:1219,111,0	1/1:0,45:46:99:1331,120,0
5	57564489	rs15745800	5:57564489	0/0:28,0:28:69:0,69,648	0/0:30,0:30:72:0,72,687	0/0:28,0:28:72:0,72,667	1/1:1,30:31:63:664,63,0	1/1:0,33:33:69:720,69,0	1/1:1,26:27:63:658,63,0
5	57569103	rs312638790	5:57569103	0/0:41,0:41:87:0,87,864	0/0:14,1:16:33:0,33,321	0/0:24,0:25:51:0,51,519	1/1:0,23:23:57:605,57,0	1/1:0,26:26:69:702,69,0	1/1:1,20:21:51:535,51,0
5	57571327	rs317473291	5:57571327	0/0:41,1:43:84:0,84,856	0/0:19,1:20:51:0,51,520	0/0:34,0:34:90:0,90,885	1/1:0,34:34:87:959,87,0	1/1:0,39:39:99:1094,99,0	1/1:0,26:27:72:776,72,0
5	57571573	rs317633255	5:57571573	0/0:31,0:32:78:0,78,833	0/0:35,0:35:81:0,81,830	0/0:32,0:32:66:0,66,661	1/1:0,21:21:54:588,54,0	1/1:0,36:36:93:979,93,0	1/1:0,39:40:99:1149,108,0
5	57571740	rs10724983	5:57571740	0/0:29,0:29:66:0,66,592	0/0:26,0:26:51:0,51,458	0/0:25,0:26:51:0,51,462	1/1:1,35:37:87:930,87,0	1/1:0,45:45:99:1335,123,0	1/1:0,30:30:75:811,75,0
5	57580977	rs315560597	5:57580977	0/0:24,0:24:54:0,54,562	0/0:39,0:39:99:0,105,1125	0/0:41,1:43:99:0,108,1135	1/1:0,41:41:99:1147,105,0	1/1:0,39:39:84:878,84,0	1/1:0,48:49:99:1287,120,0
5	57587627	rs737661139	5:57587627	0/0:28,0:29:51:0,51,461	0/0:21,0:21:45:0,45,395	0/0:29,0:29:57:0,57,524	1/1:0,19:20:42:408,42,0	1/1:0,24:25:66:686,66,0	1/1:0,41:42:99:1066,102,0
5	57587761	rs732999692	5:57587761	0/0:14,0:14:27:0,27,245	0/0:30,0:31:54:0,54,477	0/0:15,0:16:27:0,27,246	1/1:1,24:26:57:592,57,0	1/1:0,26:27:60:615,60,0	1/1:0,25:25:51:512,51,0
5	57587770	rs737204668	5:57587770	0/0:15,0:15:30:0,30,279	0/0:29,0:30:57:0,57,501	0/0:20,0:22:39:0,39,341	1/1:1,24:27:54:573,54,0	1/1:0,29:30:57:595,57,0	1/1:1,27:28:54:550,54,0
5	57692532	rs315679685	5:57692532	0/0:30,0:31:69:0,69,680	0/0:22,0:22:54:0,54,551	0/0:20,0:21:48:0,48,501	1/1:0,23:23:63:664,63,0	1/1:0,35:35:99:1140,105,0	1/1:0,28:28:75:827,75,0
5	57698779	rs16521503	5:57698779	0/0:40,0:41:99:0,102,1036	0/0:35,0:35:84:0,84,885	0/0:35,0:36:84:0,84,866	1/1:0,25:26:69:732,69,0	1/1:0,36:36:99:1104,102,0	1/1:0,27:27:69:733,69,0
5	57698962	rs317981855	5:57698962	0/0:20,0:21:51:0,51,529	0/0:24,0:25:57:0,57,605	0/0:25,0:26:66:0,66,647	1/1:0,24:24:66:718,66,0	1/1:0,29:29:66:743,66,0	1/1:0,30:31:84:895,84,0
5	58626155	rs313942054	5:58626155	0/0:35,0:36:90:0,90,899	0/0:20,0:21:51:0,51,520	0/0:29,0:31:69:0,69,719	1/1:0,19:20:57:604,57,0	1/1:0,38:38:93:944,93,0	1/1:0,34:34:87:914,87,0
5	58627585	rs316103805	5:58627585	0/0:20,1:21:36:0,36,362	0/0:20,0:21:51:0,51,493	0/0:27,0:27:60:0,60,613	1/1:0,32:32:81:837,81,0	1/1:1,33:34:84:889,84,0	1/1:0,38:38:87:908,87,0
5	58683447	.	5:58683447	0/0:11,0:11:24:0,24,233	0/0:20,0:20:42:0,42,408	0/0:16,2:18:33:0,33,328	1/1:0,17:17:24:254,24,0	1/1:0,13:13:18:195,18,0	1/1:0,13:13:24:232,24,0
6	1777690	rs732538704	6:1777690	0/0:23,0:23:63:0,63,611	0/0:22,0:23:54:0,54,536	0/0:22,0:23:51:0,51,550	1/1:0,34:34:90:985,90,0	1/1:0,55:55:99:1641,150,0	1/1:0,29:29:78:885,78,0
6	1778057	rs317342907	6:1778057	1/1:0,31:31:78:801,78,0	1/1:0,23:23:63:647,63,0	1/1:1,19:20:39:398,39,0	0/0:29,0:29:78:0,78,795	0/0:50,0:50:99:0,135,1429	0/0:29,0:29:72:0,72,760
6	25417817	rs10724392	6:25417817	0/0:34,0:36:72:0,72,719	0/0:29,0:29:60:0,60,611	0/0:19,0:19:33:0,33,327	1/1:0,26:26:57:611,57,0	1/1:0,35:35:66:715,66,0	1/1:0,39:39:84:878,84,0
6	25418702	rs316862399	6:25418702	1/1:0,30:30:63:594,63,0	1/1:0,31:34:66:598,66,0	1/1:0,30:33:75:680,75,0	0/0:32,0:33:84:0,84,911	0/0:40,0:40:99:0,105,1171	0/0:40,0:40:99:0,102,1123
6	25418981	rs314425472	6:25418981	1/1:1,17:21:10:259,10,0	1/1:0,12:13:21:188,21,0	1/1:0,20:22:33:273,33,0	0/0:30,0:30:54:0,54,547	0/0:43,0:43:99:0,105,1102	0/0:36,0:37:81:0,81,822
6	25426550	rs15805045	6:25426550	0/0:27,0:27:48:0,48,456	0/0:24,0:24:48:0,48,476	0/0:25,0:25:54:0,54,519	1/1:0,35:36:84:920,84,0	1/1:0,35:35:72:788,72,0	1/1:0,40:41:78:873,78,0
6	25729916	rs314656272	6:25729916	1/1:0,33:34:81:807,81,0	1/1:0,18:18:54:559,54,0	1/1:0,33:33:84:896,84,0	0/0:36,0:37:99:0,99,959	0/0:30,0:31:84:0,84,831	0/0:32,0:33:78:0,78,764
6	25729950	rs312604476	6:25729950	1/1:3,26:29:40:630,40,0	1/1:0,19:20:42:444,42,0	1/1:3,33:37:81:855,81,0	0/0:36,1:37:93:0,93,982	0/0:31,0:31:87:0,87,900	0/0:36,0:37:93:0,93,931
6	27057891	rs15808781	6:27057891	0/0:22,0:23:48:0,48,491	0/0:30,0:30:78:0,78,821	0/0:38,0:38:99:0,102,1073	1/1:0,44:44:99:1315,126,0	1/1:0,50:50:99:1515,138,0	1/1:0,36:36:99:1057,99,0
6	27060310	rs316182573	6:27060310	1/1:0,41:41:99:1116,105,0	1/1:0,27:27:69:736,69,0	1/1:0,32:32:66:707,66,0	0/0:38,0:38:96:0,96,879	0/0:42,0:42:99:0,102,978	0/0:47,0:47:99:0,120,1117
6	27546516	rs15810210	6:27546516	1/1:0,41:41:96:993,96,0	1/1:0,29:30:63:608,63,0	1/1:0,33:34:75:740,75,0	0/0:46,0:48:99:0,117,1216	0/0:36,0:36:87:0,87,911	0/0:40,0:40:96:0,96,1029
6	27548743	rs741615883	6:27548743	0/0:45,0:45:99:0,120,1246	0/0:31,0:32:69:0,69,702	0/0:35,0:35:87:0,87,866	1/1:0,41:41:99:1184,114,0	1/1:0,38:38:99:1148,105,0	1/1:0,30:30:78:856,78,0
6	27567803	rs737863701	6:27567803	0/0:26,0:27:57:0,57,580	0/0:21,0:22:48:0,48,500	0/0:29,0:32:57:0,57,588	1/1:0,29:29:78:804,78,0	1/1:0,43:44:99:1200,111,0	1/1:0,37:39:96:1009,96,0
6	27568371	rs14589261	6:27568371	1/1:0,35:35:99:1054,102,0	1/1:0,34:34:96:998,96,0	1/1:0,29:30:66:694,66,0	0/0:38,0:38:99:0,108,1165	0/0:46,0:47:99:0,126,1384	0/0:28,0:28:72:0,72,781
6	27568540	rs14589262	6:27568540	1/1:0,39:39:87:781,87,0	1/1:0,27:28:60:612,60,0	1/1:0,31:33:72:666,72,0	0/0:42,0:42:99:0,120,1338	0/0:50,0:50:99:0,138,1495	0/0:46,0:46:99:0,126,1378
6	27568864	rs15810312	6:27568864	0/0:20,0:21:48:0,48,480	0/0:23,0:23:57:0,57,561	0/0:27,0:28:72:0,72,757	1/1:1,33:37:66:915,66,0	1/1:0,27:27:69:747,69,0	1/1:0,30:31:81:847,81,0
6	27568983	rs15810315	6:27568983	0/0:34,0:35:81:0,81,872	0/0:26,0:26:63:0,63,643	0/0:31,0:31:75:0,75,791	1/1:0,31:31:84:894,84,0	1/1:0,46:47:99:1263,120,0	1/1:0,31:31:78:823,78,0
6	27569404	rs737454263	6:27569404	0/0:23,0:25:60:0,60,626	0/0:31,0:32:69:0,69,721	0/0:33,0:33:90:0,90,935	1/1:0,33:33:87:926,87,0	1/1:0,34:34:87:923,87,0	1/1:0,32:32:84:903,84,0
6	27569699	rs15810317	6:27569699	0/0:28,0:28:54:0,54,511	0/0:27,0:27:57:0,57,515	0/0:51,0:53:99:0,114,1040	1/1:0,31:31:81:866,81,0	1/1:0,57:57:99:1752,159,0	1/1:0,49:49:99:1448,132,0
7	10530644	rs737878538	7:10530644	0/0:40,0:40:99:0,102,1063	0/0:29,0:29:72:0,72,793	0/0:36,0:37:93:0,93,967	1/1:1,35:36:84:820,84,0	1/1:0,32:34:78:801,78,0	1/1:0,30:30:81:810,81,0
7	10530697	rs312641134	7:10530697	0/0:43,0:43:99:0,105,1129	0/0:30,1:32:81:0,81,867	0/0:40,1:41:99:0,102,1095	1/1:1,38:39:99:1058,105,0	1/1:0,45:45:99:1247,120,0	1/1:0,34:34:90:919,90,0
7	10530720	rs312761185	7:10530720	0/0:44,0:44:99:0,108,1130	0/0:32,0:33:81:0,81,855	0/0:35,0:35:84:0,84,863	1/1:0,43:43:99:974,99,0	1/1:0,42:44:99:974,102,0	1/1:0,32:32:84:805,84,0
7	10530739	rs316830038	7:10530739	0/0:40,0:41:99:0,99,1020	0/0:33,0:33:93:0,93,977	0/0:32,0:35:69:0,69,716	1/1:0,45:46:99:1184,117,0	1/1:0,42:43:99:1220,120,0	1/1:0,34:34:87:883,87,0
7	10530781	rs316410014	7:10530781	0/0:36,0:37:81:0,81,799	0/0:34,1:35:90:0,90,934	0/0:32,0:34:90:0,90,891	1/1:0,47:47:99:1150,108,0	1/1:0,40:40:99:1120,108,0	1/1:0,35:35:99:1058,99,0
7	10530806	rs317557827	7:10530806	0/0:29,0:30:81:0,81,819	0/0:35,0:36:84:0,84,854	0/0:27,0:27:60:0,60,614	1/1:0,48:48:99:1292,123,0	1/1:0,37:37:87:919,87,0	1/1:0,35:35:87:935,87,0
7	10530809	rs317284552	7:10530809	0/0:30,0:30:72:0,72,738	0/0:33,1:34:87:0,87,897	0/0:26,0:26:72:0,72,732	1/1:2,44:46:99:1322,123,0	1/1:0,35:35:99:1046,99,0	1/1:0,34:34:93:1010,93,0
7	10530889	rs736804185	7:10530889	0/0:30,0:31:66:0,66,681	0/0:36,0:36:81:0,81,830	0/0:22,0:24:57:0,57,593	1/1:0,41:42:69:707,69,0	1/1:1,35:38:69:699,69,0	1/1:0,31:33:63:655,63,0
7	10530890	rs741542121	7:10530890	0/0:30,0:31:72:0,72,757	0/0:35,0:37:84:0,84,865	0/0:22,1:24:60:0,60,649	1/1:0,42:42:99:1050,105,0	1/1:0,40:40:99:1009,99,0	1/1:0,33:33:72:747,72,0
7	10530908	rs316530311	7:10530908	0/0:27,1:28:66:0,66,601	0/0:32,0:33:72:0,72,651	0/0:26,0:26:54:0,54,502	1/1:0,42:42:99:985,99,0	1/1:0,39:39:99:1047,102,0	1/1:0,31:31:72:745,72,0
7	10530933	rs737364907	7:10530933	0/0:35,1:36:75:0,75,763	0/0:25,0:26:51:0,51,548	0/0:23,0:23:54:0,54,565	1/1:1,41:42:70:904,70,0	1/1:0,39:39:87:915,87,0	1/1:1,31:32:66:676,66,0
7	10530967	rs736380481	7:10530967	0/0:36,0:37:81:0,81,883	0/0:31,0:31:84:0,84,871	0/0:22,0:22:57:0,57,592	1/1:0,33:34:75:726,75,0	1/1:0,36:36:78:787,78,0	1/1:0,26:26:60:584,60,0
7	10530974	.	7:10530974	0/0:37,0:38:93:0,93,994	0/0:30,1:31:69:0,69,741	0/0:23,0:23:63:0,63,670	1/1:0,34:34:78:749,78,0	1/1:0,35:35:81:807,81,0	1/1:0,26:26:60:575,60,0
7	10530980	rs733890619	7:10530980	0/0:37,0:38:90:0,90,917	0/0:32,0:32:78:0,78,808	0/0:24,0:24:63:0,63,657	1/1:0,35:35:78:756,78,0	1/1:0,34:34:81:793,81,0	1/1:0,25:25:54:490,54,0
7	10530992	rs741433447	7:10530992	0/0:32,1:34:69:0,69,727	0/0:30,0:30:72:0,72,797	0/0:26,1:27:75:0,75,781	1/1:0,37:37:96:919,96,0	1/1:0,35:35:75:706,75,0	1/1:0,20:20:51:465,51,0
7	10531047	rs317969045	7:10531047	0/0:39,0:40:87:0,87,921	0/0:31,0:31:78:0,78,779	0/0:30,0:30:63:0,63,599	1/1:0,41:41:93:975,93,0	1/1:0,38:38:99:1021,99,0	1/1:0,27:28:72:737,72,0
7	13294445	rs317678259	7:13294445	1/1:0,33:34:78:806,78,0	1/1:1,22:23:48:494,48,0	1/1:1,27:30:60:590,60,0	0/0:34,0:34:93:0,93,984	0/0:41,0:41:99:0,114,1228	0/0:32,0:33:87:0,87,918
7	13295338	rs316478943	7:13295338	0/0:32,0:32:72:0,72,756	0/0:25,1:26:72:0,72,751	0/0:27,1:29:75:0,75,810	1/1:0,33:33:81:918,81,0	1/1:0,29:29:81:862,81,0	1/1:1,33:36:90:957,90,0
7	13298454	rs16586857	7:13298454	0/0:31,0:33:75:0,75,698	0/0:26,0:27:57:0,57,537	0/0:34,0:35:63:0,63,626	1/1:0,34:34:90:918,90,0	1/1:0,45:47:99:1195,111,0	1/1:0,34:34:90:953,90,0
7	14272288	rs313920312	7:14272288	0/0:26,0:26:66:0,66,651	0/0:26,0:26:63:0,63,622	0/0:37,0:37:87:0,87,865	1/1:0,32:32:90:949,90,0	1/1:0,39:40:99:1099,102,0	1/1:0,36:37:84:872,84,0
7	14272359	rs734834664	7:14272359	0/0:26,0:26:72:0,72,717	0/0:23,0:23:60:0,60,627	0/0:44,0:44:99:0,123,1330	1/1:0,32:32:96:1040,96,0	1/1:0,36:36:96:1000,96,0	1/1:0,34:34:96:1015,96,0
7	14288798	rs312670130	7:14288798	0/0:37,0:37:87:0,87,937	0/0:26,0:26:69:0,69,712	0/0:36,0:36:93:0,93,963	1/1:0,43:43:99:1139,114,0	1/1:0,39:39:99:1096,105,0	1/1:0,40:40:99:1148,108,0
7	14288838	rs313957650	7:14288838	0/0:42,0:42:99:0,117,1186	0/0:20,0:23:57:0,57,582	0/0:37,0:38:90:0,90,938	1/1:0,38:39:99:1077,99,0	1/1:0,40:42:99:1224,111,0	1/1:0,39:40:99:1048,102,0
7	14288855	rs313160351	7:14288855	0/0:42,0:43:99:0,120,1229	0/0:27,0:27:63:0,63,643	0/0:39,0:39:99:0,99,1035	1/1:0,42:42:99:1097,105,0	1/1:0,47:47:99:1373,129,0	1/1:0,36:36:93:996,93,0
7	14311566	rs315433713	7:14311566	0/0:30,0:32:78:0,78,805	0/0:35,0:35:90:0,90,913	0/0:32,0:32:87:0,87,857	1/1:0,38:38:99:1104,102,0	1/1:0,36:36:99:1077,99,0	1/1:0,40:41:99:1186,108,0
7	14563977	rs10724617	7:14563977	0/0:35,0:36:72:0,72,721	0/0:28,0:29:66:0,66,655	0/0:36,0:37:93:0,93,925	1/1:0,31:31:72:764,72,0	1/1:0,34:35:87:944,87,0	1/1:0,38:38:93:981,93,0
7	14570338	rs10722565	7:14570338	0/0:35,0:35:75:0,75,809	0/0:42,0:43:99:0,117,1198	0/0:28,0:30:81:0,81,852	1/1:0,41:42:99:1120,102,0	1/1:0,35:35:87:925,87,0	1/1:0,42:42:99:1177,111,0
7	15907854	rs312528896	7:15907854	0/0:35,0:36:81:0,81,747	0/0:28,0:29:78:0,78,718	0/0:30,0:31:78:0,78,715	1/1:0,37:37:96:1033,96,0	1/1:0,38:39:99:1109,102,0	1/1:0,44:45:99:1213,111,0
7	15907985	rs313612590	7:15907985	1/1:0,30:30:63:631,63,0	1/1:0,31:31:75:794,75,0	1/1:0,38:39:93:934,93,0	0/0:37,0:37:93:0,93,894	0/0:36,0:37:72:0,72,717	0/0:35,0:35:78:0,78,738
7	15907988	rs314120770	7:15907988	0/0:29,0:30:72:0,72,695	0/0:31,0:32:66:0,66,682	0/0:39,0:39:84:0,84,807	1/1:0,38:39:99:1101,102,0	1/1:0,37:37:99:1084,102,0	1/1:1,34:35:87:919,87,0
7	16405547	rs739241392	7:16405547	1/1:0,54:54:99:1404,135,0	1/1:0,24:24:69:681,69,0	1/1:0,32:33:78:770,78,0	0/0:37,0:37:96:0,96,1015	0/0:38,0:38:99:0,111,1179	0/0:38,0:38:99:0,102,1104
7	16405964	rs734677551	7:16405964	1/1:0,50:50:99:1174,117,0	1/1:0,27:27:69:660,69,0	1/1:0,28:28:66:657,66,0	0/0:36,0:36:93:0,93,1008	0/0:44,0:44:99:0,114,1243	0/0:37,0:37:96:0,96,1050
7	16405965	.	7:16405965	1/1:0,50:50:99:1208,120,0	1/1:0,25:27:57:557,57,0	1/1:0,27:28:63:653,63,0	0/0:36,0:36:99:0,99,1074	0/0:43,0:43:99:0,108,1190	0/0:36,0:36:93:0,93,1010
7	16406005	rs80740534	7:16406005	1/1:0,48:48:99:1117,108,0	1/1:0,32:33:81:773,81,0	1/1:0,34:34:78:759,78,0	0/0:36,0:36:99:0,105,1157	0/0:43,0:44:99:0,117,1277	0/0:33,0:33:93:0,93,1023
7	19591179	rs314440679	7:19591179	1/1:0,32:32:69:616,69,0	1/1:0,32:32:81:752,81,0	1/1:0,30:30:75:681,75,0	0/0:43,0:43:99:0,114,1236	0/0:46,0:47:99:0,123,1334	0/0:33,0:33:99:0,99,1035
7	19611012	rs794369927	7:19611012	1/1:0,37:37:93:974,93,0	1/1:0,42:43:99:1076,105,0	1/1:1,24:25:66:700,66,0	0/0:33,0:34:87:0,87,911	0/0:41,0:41:99:0,102,1115	0/0:43,0:43:99:0,120,1233
7	19611220	rs315933785	7:19611220	1/1:0,33:33:78:806,78,0	1/1:0,30:32:69:693,69,0	1/1:0,32:32:66:690,66,0	0/0:31,0:31:81:0,81,855	0/0:43,0:43:99:0,120,1324	0/0:35,0:35:99:0,102,1055
7	19611288	rs317641473	7:19611288	1/1:0,39:41:99:1103,105,0	1/1:0,35:35:90:937,90,0	1/1:0,28:29:60:650,60,0	0/0:34,0:34:90:0,90,857	0/0:31,0:32:78:0,78,754	0/0:43,0:43:99:0,111,1057
7	19611426	rs315935627	7:19611426	1/1:0,42:43:99:1096,105,0	1/1:0,36:36:90:931,90,0	1/1:0,26:26:66:695,66,0	0/0:31,0:32:90:0,90,983	0/0:48,0:49:99:0,117,1271	0/0:38,0:39:90:0,90,928
7	19611690	rs312578528	7:19611690	1/1:0,39:39:93:939,93,0	1/1:1,26:27:72:737,72,0	1/1:0,28:28:75:813,75,0	0/0:31,0:31:84:0,84,924	0/0:39,0:39:99:0,99,1054	0/0:24,0:24:69:0,69,715
7	19611765	rs316184139	7:19611765	1/1:0,41:42:99:1108,111,0	1/1:0,31:31:78:805,78,0	1/1:0,25:26:69:709,69,0	0/0:38,0:39:99:0,105,1129	0/0:42,0:42:99:0,117,1286	0/0:34,0:34:93:0,93,1008
7	19612000	rs741011178	7:19612000	1/1:0,23:24:42:378,42,0	1/1:0,30:30:60:551,60,0	1/1:0,29:29:63:566,63,0	0/0:31,0:31:78:0,78,857	0/0:30,0:31:84:0,84,926	0/0:32,0:32:90:0,90,993
7	19612490	rs315084967	7:19612490	1/1:0,21:21:54:582,54,0	1/1:0,27:28:69:697,69,0	1/1:0,37:38:87:879,87,0	0/0:31,0:31:75:0,75,789	0/0:42,0:42:99:0,105,1013	0/0:32,0:33:69:0,69,698
7	25760279	rs316176079	7:25760279	0/0:38,0:38:96:0,96,976	0/0:37,0:37:93:0,93,943	0/0:37,0:37:90:0,90,959	1/1:0,42:42:99:1145,105,0	1/1:0,46:46:99:1412,129,0	1/1:0,50:51:99:1443,132,0
7	25761049	rs314915420	7:25761049	0/0:31,0:31:78:0,78,813	0/0:34,0:35:96:0,96,997	0/0:35,0:35:69:0,69,662	1/1:0,35:35:93:1017,93,0	1/1:0,32:32:78:886,78,0	1/1:0,33:33:90:978,90,0
7	25801972	rs315788670	7:25801972	0/0:22,0:23:36:0,36,381	0/0:28,0:28:69:0,69,702	0/0:39,0:41:99:0,105,1076	1/1:0,24:24:66:644,66,0	1/1:0,23:23:57:566,57,0	1/1:0,48:48:99:1044,108,0
7	25803722	.	7:25803722	0/0:29,0:30:75:0,75,812	0/0:33,0:33:93:0,93,941	0/0:25,0:25:69:0,69,693	1/1:0,38:38:99:1110,105,0	1/1:0,44:44:99:1301,120,0	1/1:0,42:42:99:1275,117,0
7	26390735	rs312937758	7:26390735	0/0:29,0:29:66:0,66,603	0/0:28,0:28:66:0,66,618	0/0:25,0:25:54:0,54,491	1/1:0,40:40:99:1224,111,0	1/1:0,40:40:99:1249,117,0	1/1:0,34:35:96:1038,96,0
7	26413700	rs10725187	7:26413700	0/0:37,0:38:96:0,96,1000	0/0:34,0:34:87:0,87,877	0/0:26,0:27:63:0,63,660	1/1:0,32:32:78:836,78,0	1/1:0,33:33:93:1012,93,0	1/1:0,29:29:81:891,81,0
7	26416216	rs14620771	7:26416216	1/1:0,34:35:54:473,54,0	1/1:1,27:31:66:610,66,0	1/1:0,33:34:84:804,84,0	0/0:36,0:38:84:0,84,909	0/0:33,0:33:72:0,72,776	0/0:40,0:41:99:0,102,1106
7	26416913	rs14620774	7:26416913	1/1:0,36:36:96:1005,96,0	1/1:0,35:36:81:818,81,0	1/1:0,40:40:99:1039,102,0	0/0:36,0:36:99:0,99,1049	0/0:42,0:42:99:0,117,1168	0/0:35,0:35:99:0,102,1069
7	29270896	rs739528470	7:29270896	0/0:32,0:33:51:0,51,470	0/0:28,0:28:45:0,45,391	0/0:27,0:27:60:0,60,532	1/1:0,30:31:78:819,78,0	1/1:0,32:32:90:995,90,0	1/1:0,41:41:99:1162,105,0
7	29271519	rs317595589	7:29271519	0/0:27,1:28:63:0,63,622	0/0:21,0:21:48:0,48,500	0/0:26,1:28:66:0,66,689	1/1:1,34:35:93:966,93,0	1/1:0,33:33:96:994,96,0	1/1:0,33:34:75:771,75,0
7	34056991	rs15887768	7:34056991	0/0:37,0:38:99:0,105,1092	0/0:33,0:35:81:0,81,834	0/0:30,0:31:63:0,63,632	1/1:0,37:39:99:1024,102,0	1/1:0,44:45:99:1279,123,0	1/1:0,39:39:99:1085,105,0
7	34057006	rs317000002	7:34057006	0/0:32,0:33:93:0,93,918	0/0:35,0:35:84:0,84,842	0/0:31,1:32:81:0,81,788	1/1:0,37:37:99:1116,102,0	1/1:0,45:45:99:1241,117,0	1/1:0,37:37:99:1087,105,0
7	34057779	rs317749185	7:34057779	0/0:28,0:29:69:0,69,688	0/0:26,0:26:66:0,66,662	0/0:27,0:27:69:0,69,701	1/1:0,35:35:84:905,84,0	1/1:0,46:46:99:1424,129,0	1/1:0,39:39:99:1145,108,0
8	7256417	rs10724933	8:7256417	0/0:33,0:33:78:0,78,721	0/0:31,0:33:69:0,69,675	0/0:22,2:26:39:0,39,404	1/1:0,35:37:87:824,87,0	1/1:0,35:35:96:920,96,0	1/1:0,26:27:57:565,57,0
8	7269256	rs16624710	8:7269256	0/0:22,0:22:54:0,54,589	0/0:37,0:37:93:0,93,927	0/0:43,0:43:99:0,111,1170	1/1:0,43:43:99:1214,117,0	1/1:0,43:43:99:1350,126,0	1/1:0,47:47:99:1466,141,0
8	7706073	rs314273635	8:7706073	0/0:35,0:36:96:0,96,958	0/0:33,0:33:81:0,81,863	0/0:38,0:38:78:0,78,800	1/1:0,26:27:63:702,63,0	1/1:0,50:50:99:1270,117,0	1/1:0,44:44:99:1113,102,0
8	7706613	rs734071587	8:7706613	0/0:29,0:29:63:0,63,646	0/0:31,0:32:69:0,69,671	0/0:29,0:29:69:0,69,697	1/1:0,40:40:99:1120,102,0	1/1:0,32:33:78:867,78,0	1/1:0,28:28:78:859,78,0
8	7707668	rs313474917	8:7707668	0/0:27,0:27:57:0,57,520	0/0:22,0:23:42:0,42,382	0/0:21,0:21:51:0,51,477	1/1:0,47:47:99:1214,108,0	1/1:0,40:41:99:1171,108,0	1/1:0,36:36:93:1019,93,0
8	12925664	rs14642768	8:12925664	0/0:38,0:40:99:0,102,977	0/0:26,0:26:60:0,60,610	0/0:25,0:26:57:0,57,560	1/1:0,37:39:81:849,81,0	1/1:0,34:36:69:733,69,0	1/1:0,32:33:75:800,75,0
8	12930804	rs314687412	8:12930804	1/1:0,30:30:69:660,69,0	1/1:0,18:20:30:289,30,0	1/1:0,40:41:72:705,72,0	0/0:36,0:37:84:0,84,908	0/0:43,0:43:87:0,87,946	0/0:42,0:43:96:0,96,993
8	13442841	rs312461073	8:13442841	0/0:41,0:41:99:0,111,1158	0/0:30,0:30:75:0,75,748	0/0:32,0:32:84:0,84,907	1/1:0,41:41:99:1126,105,0	1/1:0,41:41:99:1276,114,0	1/1:0,43:44:99:1396,126,0
8	13452736	rs15914024	8:13452736	0/0:28,1:29:55:0,55,782	0/0:28,0:28:75:0,75,815	0/0:37,0:37:87:0,87,938	1/1:0,34:34:99:1085,99,0	1/1:0,44:44:99:1378,129,0	1/1:0,38:38:99:1117,105,0
8	20040955	rs739411672	8:20040955	1/1:0,32:32:66:686,66,0	1/1:1,35:36:90:896,90,0	1/1:1,24:25:34:555,34,0	0/0:29,0:29:72:0,72,783	0/0:38,0:38:99:0,102,1079	0/0:36,0:36:93:0,93,997
8	20041093	rs736443246	8:20041093	1/1:0,32:33:81:803,81,0	1/1:0,39:41:93:934,93,0	1/1:1,29:31:75:782,75,0	0/0:38,0:38:93:0,93,1027	0/0:34,0:34:93:0,93,1012	0/0:34,1:35:75:0,75,819
8	20041103	rs739887951	8:20041103	1/1:0,33:33:84:838,84,0	1/1:0,39:39:90:936,90,0	1/1:0,31:32:78:814,78,0	0/0:37,0:37:96:0,96,1042	0/0:35,0:36:93:0,93,1012	0/0:38,0:38:90:0,90,939
8	20041463	rs16638761	8:20041463	1/1:0,29:31:66:591,66,0	1/1:0,21:21:36:328,36,0	1/1:0,28:28:72:654,72,0	0/0:29,0:29:81:0,81,909	0/0:28,0:29:78:0,78,855	0/0:19,0:20:51:0,51,540
8	20041485	rs16638762	8:20041485	1/1:0,32:34:60:626,60,0	1/1:0,26:26:60:629,60,0	1/1:0,33:34:72:720,72,0	0/0:31,0:31:66:0,66,643	0/0:33,0:34:87:0,87,843	0/0:21,0:21:51:0,51,478
8	20082178	rs29008265	8:20082178	0/0:41,0:43:90:0,90,865	0/0:31,0:33:75:0,75,775	0/0:41,0:43:96:0,96,948	1/1:1,32:33:93:996,93,0	1/1:0,43:45:99:1286,117,0	1/1:0,37:38:93:1056,93,0
8	20083959	rs14649991	8:20083959	0/0:44,0:45:99:0,108,1121	0/0:28,0:28:72:0,72,727	0/0:30,1:31:78:0,78,803	1/1:0,43:43:99:1335,123,0	1/1:0,47:47:99:1413,129,0	1/1:0,31:31:81:885,81,0
8	20503145	rs312847887	8:20503145	1/1:0,32:35:78:769,78,0	1/1:1,33:36:66:668,66,0	1/1:0,29:30:54:554,54,0	0/0:42,0:43:99:0,105,1119	0/0:35,0:36:99:0,99,1054	0/0:38,0:38:99:0,111,1187
8	20503182	rs16639478	8:20503182	1/1:0,29:29:54:497,54,0	1/1:0,27:30:54:471,54,0	1/1:0,30:32:66:620,66,0	0/0:44,0:44:84:0,84,904	0/0:31,0:32:84:0,84,901	0/0:38,0:38:96:0,96,1020
8	20503433	rs315376737	8:20503433	0/0:28,0:28:72:0,72,672	0/0:19,0:19:36:0,36,330	0/0:31,0:31:63:0,63,608	1/1:0,31:31:84:888,84,0	1/1:0,37:38:99:1160,108,0	1/1:0,35:35:93:1001,93,0
8	20504420	rs16639487	8:20504420	1/1:1,32:34:78:783,78,0	1/1:0,24:25:54:575,54,0	1/1:0,28:28:48:465,48,0	0/0:33,0:33:84:0,84,920	0/0:26,0:26:69:0,69,713	0/0:27,0:27:75:0,75,803
8	20504606	rs16639488	8:20504606	1/1:0,18:18:42:431,42,0	1/1:0,23:23:57:547,57,0	1/1:1,28:29:66:695,66,0	0/0:27,0:27:69:0,69,669	0/0:25,0:25:72:0,72,737	0/0:28,0:28:57:0,57,592
8	20504804	rs314975033	8:20504804	1/1:0,37:37:99:1021,99,0	1/1:0,27:27:60:635,60,0	1/1:0,33:34:78:800,78,0	0/0:33,0:33:93:0,93,997	0/0:28,0:28:75:0,75,805	0/0:34,0:34:93:0,93,969
8	26251645	rs318200862	8:26251645	0/0:38,0:38:87:0,87,835	0/0:26,0:26:60:0,60,533	0/0:34,0:36:72:0,72,656	1/1:0,37:37:99:1093,99,0	1/1:0,55:55:99:1681,153,0	1/1:0,36:37:99:1069,99,0
8	26323654	rs13684311	8:26323654	0/0:27,0:30:57:0,57,529	0/0:26,0:28:63:0,63,604	0/0:30,0:32:78:0,78,747	1/1:0,37:37:87:962,87,0	1/1:0,38:38:99:1149,108,0	1/1:0,24:25:57:632,57,0
9	547533	rs317883074	9:547533	0/0:24,0:24:69:0,69,702	0/0:19,0:19:45:0,45,459	0/0:16,0:16:36:0,36,377	1/1:0,35:36:90:981,90,0	1/1:0,34:34:81:879,81,0	1/1:0,31:32:78:820,78,0
9	564041	rs316544656	9:564041	1/1:0,27:28:72:763,72,0	1/1:0,26:26:48:454,48,0	1/1:0,24:25:60:618,60,0	0/0:33,0:34:93:0,93,955	0/0:30,0:31:75:0,75,785	0/0:23,0:23:66:0,66,713
9	564275	rs314631871	9:564275	0/0:35,0:36:78:0,78,785	0/0:25,0:25:51:0,51,485	0/0:22,0:23:39:0,39,342	1/1:0,33:33:90:994,90,0	1/1:0,39:39:99:1078,99,0	1/1:0,28:28:66:699,66,0
9	564407	rs313634343	9:564407	0/0:24,0:26:48:0,48,442	0/0:20,0:20:42:0,42,391	0/0:20,0:22:54:0,54,476	1/1:0,26:26:69:739,69,0	1/1:0,26:26:66:706,66,0	1/1:0,30:30:81:882,81,0
9	4183823	rs14668833	9:4183823	1/1:0,32:33:72:671,72,0	1/1:0,22:22:54:498,54,0	1/1:0,25:26:63:589,63,0	0/0:28,1:29:75:0,75,820	0/0:43,0:43:99:0,102,1103	0/0:26,0:26:72:0,72,772
9	4183826	rs14668832	9:4183826	1/1:0,32:32:72:732,72,0	1/1:0,22:22:54:523,54,0	1/1:0,26:26:69:708,69,0	0/0:28,1:29:75:0,75,803	0/0:45,0:45:99:0,99,1037	0/0:25,0:25:63:0,63,670
9	4287359	rs14668773	9:4287359	0/0:21,0:23:54:0,54,558	0/0:29,0:31:63:0,63,664	0/0:28,0:28:63:0,63,685	1/1:0,35:35:90:881,90,0	1/1:0,46:46:99:1145,114,0	1/1:0,28:28:72:721,72,0
9	4287486	rs14668771	9:4287486	0/0:38,0:39:87:0,87,903	0/0:26,0:27:69:0,69,704	0/0:37,0:38:90:0,90,924	1/1:0,33:33:84:887,84,0	1/1:0,42:42:99:1083,105,0	1/1:0,26:26:72:742,72,0
9	4290230	rs312543542	9:4290230	0/0:29,0:29:75:0,75,791	0/0:26,0:27:69:0,69,699	0/0:33,0:34:84:0,84,898	1/1:0,22:22:54:557,54,0	1/1:0,40:40:99:1063,105,0	1/1:0,26:26:75:757,75,0
9	4290270	rs317427859	9:4290270	0/0:22,0:22:63:0,63,666	0/0:28,1:29:60:0,60,626	0/0:32,0:34:69:0,69,675	1/1:0,27:27:69:731,69,0	1/1:1,38:39:99:1032,99,0	1/1:1,24:25:72:794,72,0
9	4290449	rs14668764	9:4290449	0/0:26,0:26:72:0,72,749	0/0:22,0:22:57:0,57,554	0/0:34,0:34:84:0,84,910	1/1:0,31:32:81:832,81,0	1/1:0,38:40:90:966,90,0	1/1:1,29:30:78:841,78,0
9	4411454	rs741078962	9:4411454	1/1:0,33:34:66:647,66,0	1/1:0,22:23:57:599,57,0	1/1:0,33:34:75:769,75,0	0/0:33,0:33:78:0,78,728	0/0:42,0:42:99:0,99,930	0/0:39,0:39:96:0,96,886
9	4418832	rs314994704	9:4418832	1/1:1,29:30:57:520,57,0	1/1:1,22:25:51:466,51,0	1/1:0,27:27:51:479,51,0	0/0:31,0:31:84:0,84,894	0/0:34,1:36:93:0,93,983	0/0:27,2:29:72:0,72,738
9	4418946	rs737271247	9:4418946	1/1:0,45:45:99:1095,111,0	1/1:2,29:31:75:752,75,0	1/1:1,29:30:36:621,36,0	0/0:35,0:36:99:0,102,1095	0/0:41,0:42:99:0,105,1135	0/0:41,0:41:99:0,114,1243
9	4419275	rs738299598	9:4419275	1/1:1,34:36:66:665,66,0	1/1:0,20:20:42:448,42,0	1/1:0,39:39:93:946,93,0	0/0:40,0:41:99:0,120,1335	0/0:46,1:47:99:0,113,1435	0/0:43,0:44:99:0,105,1155
9	4422088	rs313800771	9:4422088	1/1:0,28:29:63:588,63,0	1/1:0,32:33:81:738,81,0	1/1:0,24:24:45:400,45,0	0/0:32,0:34:87:0,87,938	0/0:42,0:42:99:0,111,1210	0/0:36,0:36:84:0,84,873
9	5359682	rs737050372	9:5359682	0/0:28,0:28:69:0,69,671	0/0:21,0:21:48:0,48,496	0/0:33,0:34:72:0,72,714	1/1:0,36:36:93:947,93,0	1/1:0,46:47:99:1059,102,0	1/1:1,31:32:53:774,53,0
9	5360379	rs316789813	9:5360379	0/0:27,0:29:60:0,60,628	0/0:24,0:27:45:0,45,448	0/0:35,0:35:90:0,90,930	1/1:0,34:34:81:809,81,0	1/1:0,45:45:99:1174,114,0	1/1:0,46:47:99:1113,111,0
9	8728032	rs313154323	9:8728032	0/0:24,0:24:51:0,51,473	0/0:23,0:23:54:0,54,502	0/0:17,0:17:42:0,42,379	1/1:0,20:22:48:524,48,0	1/1:0,33:33:81:856,81,0	1/1:0,18:19:33:370,33,0
9	8728299	rs317978781	9:8728299	1/1:0,23:26:45:451,45,0	1/1:0,19:21:39:393,39,0	1/1:0,13:15:30:301,30,0	0/0:16,0:16:39:0,39,362	0/0:25,0:25:57:0,57,550	0/0:22,0:23:45:0,45,449
9	12413533	rs739815911	9:12413533	0/0:16,0:16:45:0,45,414	0/0:19,0:20:48:0,48,444	0/0:23,0:24:60:0,60,559	1/1:0,22:22:60:641,60,0	1/1:0,28:28:81:892,81,0	1/1:0,23:23:60:647,60,0
9	12413665	.	9:12413665	0/0:27,0:27:51:0,51,463	0/0:26,0:26:54:0,54,493	0/0:24,1:25:54:0,54,472	1/1:0,21:21:57:557,57,0	1/1:0,32:33:78:742,78,0	1/1:0,34:34:93:902,93,0
9	19019196	rs14679233	9:19019196	1/1:0,33:33:78:756,78,0	1/1:0,31:31:78:763,78,0	1/1:0,30:31:69:663,69,0	0/0:42,0:42:99:0,114,1201	0/0:36,0:36:99:0,105,1151	0/0:38,0:38:99:0,108,1183
9	19022876	rs313226714	9:19022876	0/0:25,0:26:63:0,63,653	0/0:20,0:22:39:0,39,418	0/0:24,0:24:51:0,51,508	1/1:0,36:36:81:836,81,0	1/1:0,36:37:93:960,93,0	1/1:1,29:30:75:777,75,0
9	19024621	rs740345277	9:19024621	1/1:0,33:34:63:591,63,0	1/1:0,31:32:66:600,66,0	1/1:0,24:25:45:432,45,0	0/0:34,0:35:84:0,84,897	0/0:42,0:45:96:0,96,1034	0/0:31,0:32:78:0,78,829
9	19024728	rs314684747	9:19024728	1/1:0,33:34:84:866,84,0	1/1:0,30:30:78:819,78,0	1/1:0,20:20:54:556,54,0	0/0:26,0:26:72:0,72,768	0/0:32,0:32:96:0,96,1067	0/0:32,0:32:96:0,96,1044
9	19024822	rs313154447	9:19024822	1/1:0,26:28:48:504,48,0	1/1:0,26:26:66:663,66,0	1/1:0,19:19:51:530,51,0	0/0:32,0:32:87:0,87,961	0/0:40,0:40:99:0,111,1204	0/0:36,0:36:96:0,96,1052
9	19388151	rs314505683	9:19388151	1/1:0,24:24:51:519,51,0	1/1:0,22:24:33:319,33,0	1/1:0,31:31:72:690,72,0	0/0:31,0:31:87:0,87,930	0/0:35,0:35:90:0,90,994	0/0:22,0:22:48:0,48,513
9	19390013	rs314736225	9:19390013	0/0:32,0:32:84:0,84,893	0/0:17,0:18:45:0,45,465	0/0:27,0:27:60:0,60,622	1/1:0,52:52:99:1505,135,0	1/1:0,33:33:93:1024,93,0	1/1:0,31:31:84:901,84,0
9	19749281	rs315193506	9:19749281	0/0:32,0:32:78:0,78,783	0/0:30,0:30:78:0,78,828	0/0:32,0:33:78:0,78,810	1/1:0,29:29:81:844,81,0	1/1:0,45:45:99:1374,129,0	1/1:0,36:37:93:1000,93,0
9	19749662	rs10721733	9:19749662	0/0:33,1:35:84:0,84,900	0/0:31,0:32:72:0,72,759	0/0:32,0:32:81:0,81,831	1/1:0,32:33:84:866,84,0	1/1:0,44:44:99:1314,126,0	1/1:0,31:32:84:891,84,0
9	21442103	rs312370771	9:21442103	1/1:0,35:36:84:822,84,0	1/1:0,30:30:75:783,75,0	1/1:0,32:32:81:809,81,0	0/0:43,0:43:99:0,108,1082	0/0:49,0:49:99:0,126,1249	0/0:44,0:44:99:0,120,1180
9	21446070	rs317081985	9:21446070	0/0:29,0:30:69:0,69,685	0/0:34,0:34:87:0,87,932	0/0:26,0:26:75:0,75,733	1/1:0,45:45:99:1302,120,0	1/1:0,38:39:99:1183,108,0	1/1:0,32:32:87:928,87,0
9	22799906	rs14683711	9:22799906	0/0:27,0:27:48:0,48,457	0/0:27,0:27:60:0,60,562	0/0:22,1:23:45:0,45,420	1/1:1,32:33:84:917,84,0	1/1:0,32:33:81:876,81,0	1/1:0,33:33:87:946,87,0
9	22801113	rs738519082	9:22801113	1/1:0,33:33:78:808,78,0	1/1:0,18:18:39:385,39,0	1/1:0,38:38:84:846,84,0	0/0:34,0:34:93:0,93,963	0/0:40,0:40:99:0,99,1040	0/0:30,0:30:75:0,75,772
10	9680235	rs316819761	10:9680235	0/0:31,0:31:81:0,81,817	0/0:27,0:27:60:0,60,566	0/0:37,0:37:84:0,84,850	1/1:0,40:41:99:1035,99,0	1/1:0,33:33:81:852,81,0	1/1:0,46:46:99:1354,126,0
10	9724685	rs316843294	10:9724685	0/0:30,0:30:57:0,57,563	0/0:25,0:26:48:0,48,475	0/0:41,0:42:78:0,78,766	1/1:0,41:41:90:833,90,0	1/1:0,29:29:72:689,72,0	1/1:0,43:43:99:990,102,0
10	9724709	rs732069639	10:9724709	0/0:31,0:31:54:0,54,542	0/0:26,0:28:72:0,72,710	0/0:39,0:39:87:0,87,883	1/1:0,41:41:99:1141,111,0	1/1:0,28:28:75:779,75,0	1/1:0,41:41:99:1112,111,0
10	9727687	rs315205657	10:9727687	1/1:0,26:26:57:519,57,0	1/1:0,29:30:75:688,75,0	1/1:0,32:32:66:608,66,0	0/0:48,0:48:99:0,141,1524	0/0:37,0:37:96:0,96,1046	0/0:27,0:27:75:0,75,800
10	10085307	rs80694855	10:10085307	0/0:23,0:23:60:0,60,601	0/0:26,0:26:63:0,63,652	0/0:22,0:22:54:0,54,527	1/1:0,34:34:90:951,90,0	1/1:0,30:30:72:755,72,0	1/1:0,26:28:78:807,78,0
10	10088159	rs731753992	10:10088159	0/0:32,0:32:90:0,90,933	0/0:35,0:35:99:0,99,1039	0/0:40,0:40:99:0,105,1073	1/1:0,44:45:99:1110,111,0	1/1:0,40:40:96:937,96,0	1/1:0,33:33:90:845,90,0
10	10161674	rs733026552	10:10161674	0/0:22,0:22:54:0,54,547	0/0:25,0:25:63:0,63,661	0/0:37,0:37:87:0,87,910	1/1:0,34:34:96:1035,96,0	1/1:0,36:36:99:1129,102,0	1/1:0,29:29:75:830,75,0
10	10164562	rs15576142	10:10164562	1/1:0,31:31:63:610,63,0	1/1:0,32:34:75:760,75,0	1/1:0,28:29:69:703,69,0	0/0:32,0:32:81:0,81,864	0/0:27,0:28:78:0,78,849	0/0:39,0:39:99:0,114,1221
10	10165346	rs736262352	10:10165346	1/1:0,26:26:60:573,60,0	1/1:0,23:23:42:407,42,0	1/1:0,28:28:66:644,66,0	0/0:34,0:35:90:0,90,970	0/0:40,0:40:99:0,108,1155	0/0:40,0:40:99:0,111,1177
10	10165987	rs313576407	10:10165987	0/0:38,0:38:84:0,84,868	0/0:26,0:26:60:0,60,610	0/0:36,0:36:90:0,90,936	1/1:0,43:44:99:1334,123,0	1/1:0,43:44:99:1157,108,0	1/1:0,42:42:99:1294,120,0
10	10182621	rs738511115	10:10182621	0/0:31,0:31:69:0,69,720	0/0:28,0:28:72:0,72,705	0/0:27,0:28:66:0,66,681	1/1:0,33:33:90:966,90,0	1/1:0,37:37:99:1119,102,0	1/1:0,51:51:99:1500,138,0
10	10185409	rs739307716	10:10185409	1/1:0,31:31:84:893,84,0	1/1:0,31:32:75:775,75,0	1/1:0,32:32:84:838,84,0	0/0:33,0:34:81:0,81,901	0/0:36,0:36:96:0,96,1081	0/0:44,0:48:99:0,126,1379
10	10185415	rs731888251	10:10185415	1/1:0,31:31:69:658,69,0	1/1:0,31:32:66:614,66,0	1/1:0,31:32:75:698,75,0	0/0:37,0:37:99:0,105,1121	0/0:38,0:38:99:0,108,1202	0/0:46,0:47:99:0,123,1335
10	10185802	rs736337193	10:10185802	1/1:0,20:20:51:516,51,0	1/1:0,21:21:54:558,54,0	1/1:0,28:28:63:638,63,0	0/0:37,0:37:75:0,75,727	0/0:29,0:30:72:0,72,682	0/0:38,0:38:96:0,96,916
10	12451457	rs315656971	10:12451457	1/1:0,36:37:87:860,87,0	1/1:0,27:27:60:601,60,0	1/1:0,21:21:57:587,57,0	0/0:32,0:33:81:0,81,845	0/0:29,0:29:66:0,66,700	0/0:27,0:27:75:0,75,791
10	12452562	rs314387227	10:12452562	1/1:0,36:38:90:883,90,0	1/1:0,30:31:69:661,69,0	1/1:0,26:29:60:571,60,0	0/0:34,1:36:96:0,96,999	0/0:35,0:36:93:0,93,987	0/0:29,0:29:66:0,66,709
10	12475340	rs10724062	10:12475340	1/1:0,26:26:66:687,66,0	1/1:0,23:23:60:620,60,0	1/1:0,27:27:57:593,57,0	0/0:30,0:30:75:0,75,802	0/0:36,0:36:93:0,93,997	0/0:39,0:39:99:0,102,1075
10	12475414	rs10725511	10:12475414	1/1:0,41:42:99:1009,99,0	1/1:0,23:23:63:635,63,0	1/1:0,23:23:66:691,66,0	0/0:41,0:42:99:0,111,1143	0/0:32,0:32:78:0,78,810	0/0:45,0:46:99:0,108,1140
10	12475917	rs14008533	10:12475917	1/1:0,31:31:60:555,60,0	1/1:1,22:23:33:305,33,0	1/1:0,24:24:48:448,48,0	0/0:34,0:34:84:0,84,868	0/0:35,0:35:81:0,81,848	0/0:34,0:36:84:0,84,863
10	19248738	rs317684413	10:19248738	0/0:23,0:23:57:0,57,523	0/0:32,0:34:72:0,72,657	0/0:36,0:37:75:0,75,668	1/1:0,35:35:87:877,87,0	1/1:0,33:34:81:857,81,0	1/1:0,18:18:42:455,42,0
10	19249117	rs315896781	10:19249117	1/1:0,40:40:99:1032,99,0	1/1:0,31:32:66:677,66,0	1/1:0,28:29:63:671,63,0	0/0:39,0:39:99:0,105,1104	0/0:45,0:45:99:0,129,1373	0/0:40,0:40:99:0,108,1157
11	86905	rs318073094	11:86905	1/1:0,36:38:81:837,81,0	1/1:0,28:28:78:791,78,0	1/1:0,34:35:75:771,75,0	0/0:36,0:36:96:0,96,1024	0/0:48,0:48:99:0,135,1489	0/0:32,0:32:84:0,84,897
11	87785	rs314691260	11:87785	1/1:0,37:39:81:851,81,0	1/1:0,33:35:84:855,84,0	1/1:0,33:35:75:772,75,0	0/0:39,0:40:99:0,102,1148	0/0:31,0:32:72:0,72,800	0/0:35,0:35:84:0,84,895
11	484883	rs317405422	11:484883	1/1:0,19:19:24:229,24,0	1/1:0,18:18:24:249,24,0	1/1:0,14:14:27:247,27,0	0/0:27,0:27:75:0,75,782	0/0:28,0:28:75:0,75,820	0/0:25,0:25:69:0,69,745
11	485847	rs15599044	11:485847	1/1:0,25:27:54:546,54,0	1/1:0,23:23:48:504,48,0	1/1:0,29:29:66:722,66,0	0/0:33,0:33:84:0,84,824	0/0:41,0:42:99:0,105,1005	0/0:47,0:47:99:0,120,1142
11	486013	rs739682187	11:486013	0/0:28,0:28:78:0,78,785	0/0:22,1:23:57:0,57,563	0/0:21,0:21:36:0,36,352	1/1:0,32:32:84:839,84,0	1/1:0,36:36:99:1037,102,0	1/1:0,33:33:87:888,87,0
11	486720	rs29006957	11:486720	0/0:24,0:24:42:0,42,373	0/0:25,0:25:45:0,45,408	0/0:29,0:30:60:0,60,521	1/1:0,41:42:72:773,72,0	1/1:0,29:31:54:591,54,0	1/1:0,26:27:60:629,60,0
11	486725	rs734989467	11:486725	1/1:0,20:24:45:464,45,0	1/1:0,23:23:51:488,51,0	1/1:0,23:28:33:316,33,0	0/0:45,0:45:99:0,126,1240	0/0:31,0:31:87:0,87,862	0/0:26,0:26:60:0,60,581
11	993141	rs14957597	11:993141	0/0:38,0:38:99:0,99,1061	0/0:24,0:24:54:0,54,546	0/0:23,0:23:54:0,54,528	1/1:0,30:30:78:852,78,0	1/1:2,38:40:99:1102,102,0	1/1:0,39:40:96:1037,96,0
11	993728	rs316500003	11:993728	0/0:37,0:37:81:0,81,797	0/0:23,0:26:45:0,45,467	0/0:30,0:31:75:0,75,745	1/1:0,38:39:99:1067,102,0	1/1:0,47:47:99:1350,126,0	1/1:0,33:34:87:916,87,0
11	1012033	.	11:1012033	0/0:30,0:31:60:0,60,612	0/0:24,1:25:54:0,54,560	0/0:36,0:36:99:0,102,1061	1/1:0,18:18:36:357,36,0	1/1:1,26:27:51:512,51,0	1/1:0,24:25:48:471,48,0
11	1012094	rs316025551	11:1012094	1/1:0,21:21:48:439,48,0	1/1:0,24:24:45:403,45,0	1/1:0,23:26:54:507,54,0	0/0:25,0:25:57:0,57,618	0/0:26,0:26:54:0,54,578	0/0:28,0:29:54:0,54,545
11	1012138	rs314881669	11:1012138	1/1:0,20:21:36:315,36,0	1/1:0,26:26:60:544,60,0	1/1:0,26:27:60:554,60,0	0/0:25,0:25:57:0,57,615	0/0:24,0:24:63:0,63,686	0/0:18,0:18:45:0,45,491
11	1014361	rs315260930	11:1014361	0/0:25,0:26:54:0,54,524	0/0:21,0:23:45:0,45,464	0/0:31,0:31:69:0,69,685	1/1:0,33:33:87:933,87,0	1/1:0,31:31:75:815,75,0	1/1:0,29:29:78:860,78,0
11	4464290	rs3137007	11:4464290	0/0:32,0:32:84:0,84,895	0/0:22,0:22:60:0,60,623	0/0:41,0:41:99:0,102,1039	1/1:0,55:55:99:1502,153,0	1/1:0,38:38:99:997,102,0	1/1:0,45:46:99:1214,123,0
11	4464311	rs14959806	11:4464311	0/0:33,0:33:87:0,87,906	0/0:21,0:21:48:0,48,481	0/0:36,0:36:96:0,96,966	1/1:0,52:52:99:1582,144,0	1/1:0,40:40:99:1252,114,0	1/1:0,44:46:99:1310,120,0
11	4468783	rs14019749	11:4468783	0/0:35,0:36:84:0,84,876	0/0:34,0:34:84:0,84,795	0/0:38,0:38:84:0,84,807	1/1:0,29:30:75:834,75,0	1/1:0,57:57:99:1684,153,0	1/1:0,37:38:99:1162,108,0
11	4468872	rs14019750	11:4468872	0/0:45,0:47:96:0,96,921	0/0:28,0:28:63:0,63,582	0/0:35,0:36:69:0,69,612	1/1:0,32:32:78:836,78,0	1/1:0,43:44:99:1255,117,0	1/1:0,47:48:99:1320,123,0
11	4473569	rs312277356	11:4473569	0/0:34,0:35:72:0,72,645	0/0:38,0:40:72:0,72,672	0/0:21,0:22:45:0,45,402	1/1:0,35:35:81:861,81,0	1/1:0,35:38:90:917,90,0	1/1:0,33:33:81:833,81,0
11	4475578	rs317252220	11:4475578	1/1:0,22:22:66:712,66,0	1/1:0,20:20:57:597,57,0	1/1:0,26:27:66:723,66,0	0/0:36,0:36:96:0,96,1032	0/0:48,0:48:99:0,129,1432	0/0:35,0:35:93:0,93,1027
11	4475659	rs730899797	11:4475659	1/1:0,13:13:18:177,18,0	1/1:0,14:14:18:169,18,0	1/1:0,11:12:24:221,24,0	0/0:40,0:40:66:0,66,585	0/0:36,0:37:75:0,75,720	0/0:46,0:46:66:0,66,622
11	4477454	rs314780437	11:4477454	1/1:0,22:23:60:619,60,0	1/1:0,20:20:51:530,51,0	1/1:0,24:24:54:565,54,0	0/0:39,0:39:96:0,96,934	0/0:24,0:24:60:0,60,589	0/0:35,0:35:93:0,93,920
11	4477802	rs15604851	11:4477802	0/0:28,0:30:60:0,60,571	0/0:30,0:30:75:0,75,721	0/0:17,0:17:33:0,33,317	1/1:0,30:31:81:866,81,0	1/1:0,28:28:75:806,75,0	1/1:0,37:38:99:1084,102,0
11	4477853	rs14019758	11:4477853	0/0:20,0:21:30:0,30,273	0/0:23,0:23:39:0,39,359	0/0:11,0:11:21:0,21,202	1/1:0,29:29:78:834,78,0	1/1:0,26:26:72:778,72,0	1/1:0,28:29:72:773,72,0
11	4478610	rs733942557	11:4478610	0/0:3,0:3:6:0,6,67	0/0:1,0:1:3:0,3,34	0/0:1,0:1:3:0,3,35	1/1:0,7:7:15:157,15,0	1/1:0,4:4:9:95,9,0	1/1:0,5:5:12:137,12,0
11	4478625	rs738707012	11:4478625	0/0:3,0:4:6:0,6,69	0/0:1,0:1:3:0,3,34	0/0:1,0:1:3:0,3,35	1/1:0,4:4:6:69,6,0	1/1:0,3:3:6:68,6,0	1/1:0,5:5:9:103,9,0
11	4480688	rs315739380	11:4480688	0/0:30,0:30:66:0,66,634	0/0:29,0:29:57:0,57,565	0/0:31,0:32:81:0,81,828	1/1:0,37:37:96:1011,96,0	1/1:0,36:36:99:1037,99,0	1/1:0,31:31:81:866,81,0
11	4480696	rs736191554	11:4480696	1/1:1,31:33:84:827,84,0	1/1:0,28:28:57:557,57,0	1/1:0,32:32:60:616,60,0	0/0:39,0:39:99:0,108,1142	0/0:39,0:39:99:0,99,1016	0/0:32,0:32:87:0,87,935
11	4482034	rs736336776	11:4482034	0/0:36,0:36:36:0,36,385	0/0:31,0:31:36:0,36,372	0/0:51,0:52:42:0,42,456	1/1:0,9:9:27:299,27,0	1/1:0,12:12:30:328,30,0	1/1:0,8:8:21:231,21,0
11	4482798	rs737815976	11:4482798	0/0:27,0:28:51:0,51,465	0/0:31,0:32:60:0,60,549	0/0:24,0:27:57:0,57,532	1/1:0,43:43:99:1068,102,0	1/1:0,41:41:99:1100,102,0	1/1:0,34:37:90:923,90,0
11	4490691	rs741389409	11:4490691	0/0:38,0:38:84:0,84,834	0/0:31,0:32:75:0,75,730	0/0:35,0:36:84:0,84,855	1/1:0,32:32:84:889,84,0	1/1:0,40:40:99:1084,99,0	1/1:0,38:38:99:1142,108,0
11	4490780	rs313802556	11:4490780	0/0:35,0:35:93:0,93,944	0/0:23,0:24:45:0,45,467	0/0:20,0:20:45:0,45,465	1/1:0,34:34:99:1068,99,0	1/1:0,38:38:99:1108,105,0	1/1:0,38:39:99:1050,99,0
11	4492910	rs80756921	11:4492910	1/1:0,25:25:72:755,72,0	1/1:0,26:26:75:782,75,0	1/1:0,29:29:78:818,78,0	0/0:34,0:34:90:0,90,917	0/0:45,0:45:99:0,117,1197	0/0:34,0:34:75:0,75,752
11	4493024	rs80675008	11:4493024	1/1:0,34:34:81:828,81,0	1/1:0,36:36:90:947,90,0	1/1:0,28:28:75:776,75,0	0/0:35,0:36:99:0,102,1105	0/0:40,0:40:99:0,105,1128	0/0:37,0:37:90:0,90,1007
11	4505934	rs733887038	11:4505934	0/0:31,0:31:78:0,78,795	0/0:33,0:33:78:0,78,818	0/0:29,0:30:75:0,75,783	1/1:0,44:45:93:946,93,0	1/1:0,45:45:99:1059,105,0	1/1:0,38:38:78:781,78,0
11	4508330	rs317613260	11:4508330	1/1:0,37:38:84:870,84,0	1/1:0,29:29:72:767,72,0	1/1:0,29:30:63:665,63,0	0/0:46,0:46:99:0,123,1150	0/0:40,0:40:93:0,93,899	0/0:30,0:30:78:0,78,759
11	4513461	rs15604880	11:4513461	0/0:32,0:32:78:0,78,797	0/0:26,0:28:69:0,69,725	0/0:39,0:40:99:0,102,1000	1/1:0,47:47:99:1291,120,0	1/1:0,49:49:99:1340,126,0	1/1:0,41:42:99:1149,108,0
11	4517876	rs317370722	11:4517876	0/0:45,0:45:99:0,102,1049	0/0:24,0:25:57:0,57,551	0/0:22,0:22:51:0,51,533	1/1:2,45:47:99:1133,105,0	1/1:1,45:46:99:1187,111,0	1/1:3,42:45:86:1086,86,0
11	5428176	rs14960261	11:5428176	0/0:36,0:36:75:0,75,657	0/0:36,0:37:87:0,87,806	0/0:24,0:25:60:0,60,546	1/1:0,37:39:87:932,87,0	1/1:0,27:27:72:788,72,0	1/1:0,24:24:63:725,63,0
11	5428403	rs313235902	11:5428403	1/1:1,39:41:99:1114,105,0	1/1:0,31:31:84:884,84,0	1/1:0,17:17:42:454,42,0	0/0:31,0:31:75:0,75,714	0/0:26,0:27:66:0,66,653	0/0:29,0:30:66:0,66,632
11	5428757	rs316410474	11:5428757	0/0:49,0:50:96:0,96,848	0/0:34,0:35:63:0,63,581	0/0:24,0:25:42:0,42,402	1/1:0,36:38:93:986,93,0	1/1:0,31:31:81:856,81,0	1/1:0,37:37:96:1007,96,0
11	5430980	rs315986582	11:5430980	1/1:0,39:39:87:878,87,0	1/1:0,18:21:45:460,45,0	1/1:0,22:22:57:588,57,0	0/0:18,0:18:42:0,42,413	0/0:35,0:36:87:0,87,853	0/0:30,0:31:75:0,75,719
11	17466543	rs14028574	11:17466543	0/0:20,0:20:54:0,54,557	0/0:22,0:22:57:0,57,608	0/0:26,0:26:63:0,63,621	1/1:0,34:34:72:698,72,0	1/1:0,34:35:78:711,78,0	1/1:0,27:28:66:628,66,0
11	17466551	rs14028575	11:17466551	0/0:19,0:20:45:0,45,476	0/0:21,0:21:45:0,45,480	0/0:29,0:30:75:0,75,765	1/1:0,33:33:87:899,87,0	1/1:0,37:37:99:1050,105,0	1/1:0,26:27:63:674,63,0
11	17466774	rs316831340	11:17466774	1/1:0,34:34:87:888,87,0	1/1:0,26:26:48:520,48,0	1/1:0,19:19:45:486,45,0	0/0:42,0:42:99:0,105,997	0/0:43,0:43:99:0,114,1126	0/0:33,0:33:84:0,84,815
11	17466859	rs313731347	11:17466859	1/1:0,38:40:78:815,78,0	1/1:0,32:33:78:801,78,0	1/1:0,24:24:63:650,63,0	0/0:36,0:36:96:0,96,1038	0/0:39,0:39:99:0,102,1134	0/0:42,0:42:99:0,105,1132
11	17466897	rs313473951	11:17466897	1/1:0,36:37:63:637,63,0	1/1:0,29:31:54:553,54,0	1/1:0,22:22:54:531,54,0	0/0:41,0:41:99:0,102,1091	0/0:31,0:31:78:0,78,870	0/0:40,0:40:99:0,102,1055
11	17467143	rs312565846	11:17467143	1/1:0,36:36:87:918,87,0	1/1:1,41:42:99:1199,114,0	1/1:0,39:41:93:993,93,0	0/0:30,0:31:72:0,72,690	0/0:41,0:42:99:0,99,928	0/0:28,0:28:72:0,72,675
11	17469290	rs313402215	11:17469290	0/0:38,0:38:72:0,72,636	0/0:18,0:19:33:0,33,320	0/0:34,0:34:66:0,66,589	1/1:1,25:27:44:708,44,0	1/1:0,26:26:66:728,66,0	1/1:0,35:35:84:914,84,0
11	17856813	rs14968047	11:17856813	0/0:44,0:44:96:0,96,845	0/0:30,0:30:69:0,69,671	0/0:28,0:28:72:0,72,673	1/1:0,38:38:99:1124,105,0	1/1:0,37:37:99:1074,99,0	1/1:0,39:39:99:1107,102,0
11	17859154	rs317568055	11:17859154	0/0:24,0:25:57:0,57,507	0/0:22,0:22:45:0,45,421	0/0:27,0:27:57:0,57,539	1/1:0,34:34:96:1041,96,0	1/1:0,41:43:99:1210,111,0	1/1:0,35:35:93:996,93,0
11	18219981	rs733791035	11:18219981	1/1:0,26:26:63:621,63,0	1/1:0,30:30:72:705,72,0	1/1:0,27:28:66:630,66,0	0/0:34,0:34:90:0,90,988	0/0:38,0:41:81:0,81,880	0/0:26,0:29:66:0,66,695
11	18220287	rs737607457	11:18220287	0/0:27,0:27:63:0,63,646	0/0:20,1:22:36:0,36,364	0/0:20,0:21:48:0,48,490	1/1:0,37:37:99:943,99,0	1/1:0,33:33:84:816,84,0	1/1:0,32:32:81:775,81,0
11	18220386	rs316264620	11:18220386	0/0:28,0:29:66:0,66,596	0/0:25,0:26:54:0,54,514	0/0:26,0:27:69:0,69,626	1/1:0,38:40:99:1092,99,0	1/1:0,32:33:90:956,90,0	1/1:0,32:32:87:933,87,0
11	18220573	rs312287173	11:18220573	0/0:25,0:25:60:0,60,612	0/0:23,0:24:60:0,60,642	0/0:21,0:21:48:0,48,503	1/1:0,30:30:72:712,72,0	1/1:0,32:32:87:840,87,0	1/1:0,23:23:51:470,51,0
11	18231195	rs316845709	11:18231195	1/1:0,29:29:75:772,75,0	1/1:0,21:23:51:491,51,0	1/1:0,24:26:45:438,45,0	0/0:43,0:43:99:0,120,1311	0/0:27,0:29:75:0,75,775	0/0:32,0:32:75:0,75,820
11	18234637	rs314860041	11:18234637	0/0:25,0:25:60:0,60,611	0/0:34,0:34:81:0,81,853	0/0:38,0:39:93:0,93,950	1/1:0,34:34:90:874,90,0	1/1:0,53:54:99:1242,129,0	1/1:0,35:35:78:765,78,0
11	18234704	rs316564855	11:18234704	0/0:31,0:31:87:0,87,921	0/0:27,0:27:72:0,72,732	0/0:43,0:43:99:0,111,1155	1/1:0,31:32:84:887,84,0	1/1:0,54:55:99:1428,138,0	1/1:0,41:41:99:1135,111,0
11	18235231	rs15626864	11:18235231	0/0:24,0:24:51:0,51,530	0/0:23,0:23:60:0,60,616	0/0:36,0:36:96:0,96,987	1/1:0,43:43:99:1283,117,0	1/1:0,32:32:87:934,87,0	1/1:0,38:38:96:1078,96,0
11	18235832	rs14968351	11:18235832	0/0:30,0:31:78:0,78,809	0/0:29,0:30:63:0,63,649	0/0:30,0:30:87:0,87,911	1/1:0,34:34:93:1002,93,0	1/1:0,33:33:78:852,78,0	1/1:0,39:39:99:1191,108,0
11	18236823	rs14968356	11:18236823	0/0:42,0:47:90:0,90,924	0/0:33,0:35:69:0,69,707	0/0:42,0:44:99:0,99,1000	1/1:0,42:42:99:1167,105,0	1/1:0,49:49:99:1325,123,0	1/1:0,35:35:96:1037,96,0
11	18239663	rs317849094	11:18239663	1/1:0,36:36:84:821,84,0	1/1:0,36:36:87:872,87,0	1/1:0,33:33:66:649,66,0	0/0:38,0:39:90:0,90,960	0/0:34,0:34:93:0,93,988	0/0:39,0:39:99:0,111,1203
11	18239693	rs737163211	11:18239693	0/0:40,0:40:99:0,105,1017	0/0:37,0:38:87:0,87,842	0/0:35,0:35:72:0,72,725	1/1:0,29:30:69:768,69,0	1/1:0,35:36:96:1052,96,0	1/1:0,32:33:87:943,87,0
11	18239703	rs740539145	11:18239703	1/1:1,37:38:90:942,90,0	1/1:1,34:35:90:932,90,0	1/1:1,32:33:75:781,75,0	0/0:30,0:30:75:0,75,808	0/0:35,0:35:99:0,99,1066	0/0:31,0:32:87:0,87,939
11	18239745	rs737299823	11:18239745	0/0:36,0:36:90:0,90,887	0/0:31,1:32:78:0,78,799	0/0:30,0:31:66:0,66,663	1/1:0,29:30:66:690,66,0	1/1:0,41:42:90:914,90,0	1/1:0,34:38:81:858,81,0
11	18239756	rs732526319	11:18239756	0/0:31,0:31:72:0,72,775	0/0:31,0:32:72:0,72,742	0/0:29,0:31:78:0,78,789	1/1:0,28:29:72:757,72,0	1/1:0,40:41:99:1065,99,0	1/1:0,37:37:93:953,93,0
11	18244374	rs316290849	11:18244374	0/0:48,0:48:99:0,126,1352	0/0:25,0:26:69:0,69,686	0/0:35,0:38:84:0,84,887	1/1:0,43:43:99:1055,108,0	1/1:0,34:35:87:852,87,0	1/1:0,34:35:81:844,81,0
11	18246751	rs16707146	11:18246751	0/0:28,0:30:66:0,66,671	0/0:30,0:33:72:0,72,722	0/0:25,0:26:63:0,63,636	1/1:0,29:29:66:630,66,0	1/1:0,36:37:96:953,96,0	1/1:0,36:36:93:878,93,0
11	18246765	rs16707145	11:18246765	0/0:29,1:32:51:0,51,485	0/0:32,0:34:75:0,75,699	0/0:26,1:28:54:0,54,488	1/1:0,33:33:87:902,87,0	1/1:0,39:39:99:1049,99,0	1/1:0,35:35:93:979,93,0
11	18247302	rs16707144	11:18247302	0/0:33,0:34:84:0,84,860	0/0:33,0:34:72:0,72,742	0/0:26,0:29:57:0,57,598	1/1:0,38:39:87:836,87,0	1/1:0,46:46:99:1329,135,0	1/1:0,40:41:99:1053,105,0
11	18255946	rs733145286	11:18255946	1/1:0,31:32:84:869,84,0	1/1:0,37:37:84:871,84,0	1/1:0,35:35:90:903,90,0	0/0:39,0:39:99:0,105,1113	0/0:49,0:49:99:0,129,1424	0/0:49,0:49:99:0,135,1508
11	18256388	rs314820907	11:18256388	0/0:23,0:23:51:0,51,490	0/0:31,0:32:69:0,69,659	0/0:42,0:44:99:0,102,946	1/1:0,39:39:99:1077,102,0	1/1:0,43:43:99:1248,117,0	1/1:0,35:37:84:904,84,0
11	18270699	rs14029167	11:18270699	0/0:44,0:45:99:0,99,991	0/0:28,0:28:72:0,72,700	0/0:26,0:26:66:0,66,664	1/1:0,39:39:99:1205,111,0	1/1:1,43:45:99:1213,114,0	1/1:0,33:33:87:923,87,0
11	18276339	rs14693329	11:18276339	1/1:0,29:29:57:624,57,0	1/1:0,16:17:30:312,30,0	1/1:0,18:18:39:392,39,0	0/0:38,0:38:99:0,102,985	0/0:39,0:39:90:0,90,911	0/0:38,0:38:87:0,87,857
11	18283642	rs316027296	11:18283642	1/1:1,26:27:43:682,43,0	1/1:0,25:26:60:639,60,0	1/1:0,32:34:78:836,78,0	0/0:29,0:30:78:0,78,758	0/0:33,0:33:78:0,78,798	0/0:31,0:31:81:0,81,804
11	18295047	rs316818174	11:18295047	1/1:0,14:14:39:410,39,0	1/1:0,14:14:33:341,33,0	1/1:0,18:19:30:304,30,0	0/0:26,0:27:51:0,51,482	0/0:28,0:29:60:0,60,562	0/0:20,0:21:45:0,45,429
11	18296179	rs739335225	11:18296179	1/1:0,33:34:63:650,63,0	1/1:0,25:25:51:488,51,0	1/1:0,25:25:57:586,57,0	0/0:29,0:29:57:0,57,502	0/0:24,0:26:60:0,60,574	0/0:34,0:34:69:0,69,649
11	18301062	rs315039976	11:18301062	1/1:2,23:27:33:528,33,0	1/1:1,27:28:66:658,66,0	1/1:0,35:36:81:816,81,0	0/0:29,0:30:69:0,69,742	0/0:45,0:45:99:0,114,1207	0/0:38,0:38:99:0,111,1187
11	18306103	rs312851411	11:18306103	1/1:0,27:27:57:522,57,0	1/1:0,23:23:45:414,45,0	1/1:1,35:36:78:696,78,0	0/0:34,1:36:84:0,84,908	0/0:32,2:34:75:0,75,808	0/0:27,0:27:72:0,72,779
11	18308099	rs737262298	11:18308099	1/1:0,30:30:45:417,45,0	1/1:1,25:26:45:407,45,0	1/1:0,23:24:39:381,39,0	0/0:36,0:38:87:0,87,937	0/0:52,0:54:99:0,132,1380	0/0:34,0:34:96:0,96,1011
11	18313223	rs317816852	11:18313223	1/1:0,28:29:60:608,60,0	1/1:0,18:18:42:430,42,0	1/1:0,30:31:75:768,75,0	0/0:35,0:35:87:0,87,964	0/0:34,0:36:93:0,93,1027	0/0:24,0:24:63:0,63,702
11	18314031	rs731115551	11:18314031	1/1:0,18:18:33:303,33,0	1/1:0,13:13:36:325,36,0	1/1:0,23:25:36:339,36,0	0/0:16,0:16:39:0,39,407	0/0:24,0:24:63:0,63,640	0/0:27,0:29:69:0,69,733
11	18314814	rs14029176	11:18314814	1/1:0,26:26:63:663,63,0	1/1:0,26:28:63:691,63,0	1/1:0,16:18:36:381,36,0	0/0:27,0:27:63:0,63,616	0/0:28,0:28:69:0,69,670	0/0:31,0:31:81:0,81,781
11	18315091	rs315547954	11:18315091	1/1:0,36:36:75:810,75,0	1/1:0,23:24:66:691,66,0	1/1:0,25:25:60:637,60,0	0/0:29,0:30:69:0,69,635	0/0:42,0:42:90:0,90,848	0/0:36,0:37:84:0,84,787
11	18316096	rs741175077	11:18316096	1/1:0,14:14:15:132,15,0	1/1:0,9:9:9:104,9,0	1/1:0,12:14:15:172,15,0	0/0:18,0:18:45:0,45,470	0/0:18,0:18:42:0,42,439	0/0:20,0:20:57:0,57,616
11	18316691	.	11:18316691	1/1:1,28:31:42:424,42,0	1/1:0,14:17:21:188,21,0	1/1:2,13:19:27:266,27,0	0/0:18,0:19:33:0,33,330	0/0:23,0:23:42:0,42,434	0/0:18,0:18:48:0,48,479
11	18316750	.	11:18316750	1/1:0,29:29:42:421,42,0	1/1:0,19:19:33:312,33,0	1/1:0,25:28:48:496,48,0	0/0:23,0:23:36:0,36,354	0/0:18,0:18:39:0,39,381	0/0:16,0:16:36:0,36,331
11	18316774	.	11:18316774	1/1:0,27:28:57:566,57,0	1/1:0,21:22:45:435,45,0	1/1:0,23:23:51:536,51,0	0/0:23,0:23:51:0,51,496	0/0:23,0:23:63:0,63,583	0/0:18,0:18:48:0,48,459
11	18316784	rs735157723	11:18316784	1/1:0,27:28:51:479,51,0	1/1:0,19:21:39:384,39,0	1/1:0,23:24:48:477,48,0	0/0:22,0:23:48:0,48,444	0/0:22,0:22:45:0,45,439	0/0:16,0:17:36:0,36,380
11	18321645	rs315923346	11:18321645	1/1:1,28:29:63:673,63,0	1/1:0,14:14:36:377,36,0	1/1:0,31:32:57:608,57,0	0/0:31,0:31:84:0,84,905	0/0:34,0:34:78:0,78,829	0/0:22,0:23:54:0,54,596
11	18321847	rs731848901	11:18321847	1/1:0,25:25:48:492,48,0	1/1:0,19:19:51:529,51,0	1/1:1,31:35:41:614,41,0	0/0:29,0:30:72:0,72,689	0/0:35,0:36:84:0,84,821	0/0:35,0:35:90:0,90,866
11	18322111	rs317735998	11:18322111	1/1:3,28:31:51:509,51,0	1/1:2,16:18:30:307,30,0	1/1:1,9:11:15:139,15,0	0/0:37,0:38:69:0,69,713	0/0:44,0:44:96:0,96,1050	0/0:32,0:35:72:0,72,763
11	18322228	.	11:18322228	1/1:0,14:15:21:208,21,0	1/1:0,17:17:27:269,27,0	1/1:0,13:16:24:245,24,0	0/0:17,0:17:45:0,45,472	0/0:24,0:24:63:0,63,648	0/0:23,0:23:63:0,63,645
11	18322311	rs733325624	11:18322311	1/1:2,22:24:39:385,39,0	1/1:0,20:20:42:427,42,0	1/1:0,23:24:48:481,48,0	0/0:22,1:23:60:0,60,641	0/0:28,0:29:66:0,66,680	0/0:26,1:27:66:0,66,685
11	18323375	rs317806696	11:18323375	1/1:0,17:17:36:361,36,0	1/1:0,29:30:57:573,57,0	1/1:0,21:22:30:319,30,0	0/0:20,0:20:57:0,57,603	0/0:24,0:24:60:0,60,624	0/0:28,0:28:78:0,78,816
11	18323902	rs3137644	11:18323902	1/1:0,42:43:96:1018,96,0	1/1:0,24:24:54:555,54,0	1/1:0,33:33:72:767,72,0	0/0:26,0:26:57:0,57,532	0/0:32,0:32:72:0,72,675	0/0:25,0:25:66:0,66,620
11	18359147	rs315147090	11:18359147	1/1:0,18:18:30:301,30,0	1/1:0,21:21:45:447,45,0	1/1:0,30:31:60:619,60,0	0/0:34,0:34:90:0,90,988	0/0:19,0:19:42:0,42,431	0/0:37,0:37:90:0,90,953
11	18359149	rs312790394	11:18359149	1/1:0,18:18:33:324,33,0	1/1:0,18:18:36:353,36,0	1/1:0,30:30:66:678,66,0	0/0:35,0:35:99:0,99,1083	0/0:19,0:19:39:0,39,405	0/0:35,0:35:99:0,99,1109
11	18359212	rs315118495	11:18359212	1/1:0,23:25:42:430,42,0	1/1:0,17:19:42:428,42,0	1/1:0,32:33:66:697,66,0	0/0:32,0:32:84:0,84,867	0/0:29,0:30:87:0,87,879	0/0:41,0:41:99:0,117,1184
11	18359290	rs313198931	11:18359290	1/1:0,31:31:60:604,60,0	1/1:0,24:25:51:500,51,0	1/1:0,30:30:78:794,78,0	0/0:32,0:32:93:0,93,876	0/0:37,0:37:93:0,93,902	0/0:34,0:34:81:0,81,760
11	18359851	rs738145083	11:18359851	1/1:0,26:26:51:511,51,0	1/1:0,19:19:36:373,36,0	1/1:0,25:29:51:516,51,0	0/0:18,0:18:45:0,45,426	0/0:31,0:31:66:0,66,632	0/0:29,0:29:78:0,78,710
11	18362368	rs314796753	11:18362368	1/1:2,32:36:47:747,47,0	1/1:1,26:27:51:533,51,0	1/1:0,13:13:21:209,21,0	0/0:30,0:31:75:0,75,717	0/0:47,0:47:99:0,129,1291	0/0:42,0:43:99:0,102,987
11	18363858	rs313891771	11:18363858	1/1:0,31:33:66:686,66,0	1/1:0,18:19:30:324,30,0	1/1:0,20:20:48:521,48,0	0/0:36,1:37:93:0,93,1026	0/0:39,0:40:87:0,87,982	0/0:25,0:26:57:0,57,622
11	18363913	rs736989168	11:18363913	1/1:0,31:31:57:530,57,0	1/1:0,20:21:45:409,45,0	1/1:0,17:18:39:350,39,0	0/0:42,0:44:99:0,102,1111	0/0:46,0:47:99:0,120,1271	0/0:37,0:37:90:0,90,959
11	18368844	rs734708842	11:18368844	1/1:0,22:24:48:480,48,0	1/1:0,23:30:57:560,57,0	1/1:0,29:29:57:593,57,0	0/0:31,0:31:84:0,84,807	0/0:31,0:31:84:0,84,815	0/0:36,0:36:87:0,87,844
11	18370248	rs737598843	11:18370248	1/1:0,18:18:42:435,42,0	1/1:0,24:25:54:554,54,0	1/1:0,28:30:60:616,60,0	0/0:21,0:23:57:0,57,560	0/0:30,0:30:75:0,75,762	0/0:37,0:39:90:0,90,866
11	18388881	rs312403807	11:18388881	1/1:0,21:21:54:554,54,0	1/1:0,26:27:69:710,69,0	1/1:0,22:22:48:459,48,0	0/0:40,0:41:99:0,102,962	0/0:40,0:40:99:0,111,1055	0/0:38,0:39:99:0,102,959
11	18389619	rs313265155	11:18389619	1/1:0,32:32:78:786,78,0	1/1:0,33:33:78:789,78,0	1/1:0,27:27:54:547,54,0	0/0:37,0:38:99:0,108,1002	0/0:38,0:38:99:0,99,944	0/0:43,0:43:99:0,114,1069
11	18389644	rs315472443	11:18389644	1/1:0,35:35:81:807,81,0	1/1:0,33:33:84:838,84,0	1/1:0,27:28:66:692,66,0	0/0:40,0:40:96:0,96,902	0/0:39,0:40:99:0,99,962	0/0:41,0:41:99:0,114,1071
11	18391438	rs317141047	11:18391438	1/1:0,31:31:51:475,51,0	1/1:0,27:28:48:418,48,0	1/1:0,19:19:39:346,39,0	0/0:26,1:27:63:0,63,624	0/0:37,0:37:90:0,90,896	0/0:29,1:30:66:0,66,661
11	18391461	rs313503661	11:18391461	1/1:0,26:27:54:535,54,0	1/1:0,21:21:36:376,36,0	1/1:0,20:21:39:398,39,0	0/0:26,0:26:69:0,69,722	0/0:36,0:37:93:0,93,945	0/0:31,0:31:75:0,75,795
11	18444401	rs317762132	11:18444401	1/1:0,32:35:84:871,84,0	1/1:0,34:36:72:725,72,0	1/1:0,21:21:48:487,48,0	0/0:43,0:43:99:0,114,1198	0/0:28,0:28:69:0,69,744	0/0:38,0:38:99:0,99,1044
11	18471936	rs313889947	11:18471936	1/1:0,23:23:51:473,51,0	1/1:0,31:31:78:741,78,0	1/1:0,38:38:87:894,87,0	0/0:33,0:34:99:0,99,935	0/0:42,0:42:99:0,108,1045	0/0:42,1:43:99:0,114,1085
11	18474253	rs315331199	11:18474253	1/1:1,44:46:99:1128,111,0	1/1:0,29:30:78:808,78,0	1/1:1,38:39:93:978,93,0	0/0:45,0:46:99:0,108,1161	0/0:35,1:36:78:0,78,837	0/0:28,0:29:69:0,69,728
11	18474671	rs316893944	11:18474671	1/1:0,37:38:90:915,90,0	1/1:0,33:33:78:797,78,0	1/1:0,40:40:99:1101,105,0	0/0:39,0:39:99:0,111,1196	0/0:42,0:43:99:0,99,1080	0/0:32,0:33:81:0,81,866
11	18474845	rs313500246	11:18474845	1/1:0,30:30:72:751,72,0	1/1:0,35:35:96:1003,96,0	1/1:0,36:36:81:841,81,0	0/0:29,0:29:69:0,69,679	0/0:40,0:40:99:0,105,1023	0/0:33,1:34:84:0,84,797
11	18485104	rs740359466	11:18485104	1/1:0,43:43:96:951,96,0	1/1:0,32:32:90:848,90,0	1/1:1,43:45:93:922,93,0	0/0:36,0:36:93:0,93,866	0/0:43,1:44:99:0,111,1073	0/0:39,0:40:84:0,84,797
11	18485219	rs14029320	11:18485219	0/0:28,0:28:63:0,63,670	0/0:24,0:26:60:0,60,630	0/0:29,1:31:34:0,34,594	1/1:0,24:24:60:553,60,0	1/1:0,38:38:93:892,93,0	1/1:0,46:46:99:1118,117,0
11	18490465	rs314802471	11:18490465	0/0:31,0:32:81:0,81,852	0/0:16,0:17:45:0,45,453	0/0:34,0:34:78:0,78,845	1/1:0,37:37:84:797,84,0	1/1:0,32:32:87:818,87,0	1/1:0,33:34:81:781,81,0
11	18490483	rs316863039	11:18490483	0/0:29,0:31:60:0,60,573	0/0:15,0:17:33:0,33,294	0/0:36,0:36:81:0,81,753	1/1:0,31:32:66:714,66,0	1/1:0,32:33:75:793,75,0	1/1:0,32:32:84:898,84,0
11	18490956	rs737060584	11:18490956	1/1:0,25:25:60:661,60,0	1/1:0,31:31:69:704,69,0	1/1:0,18:18:42:438,42,0	0/0:35,0:35:99:0,102,1021	0/0:27,0:28:75:0,75,773	0/0:34,0:34:99:0,99,1040
11	18496928	rs736670602	11:18496928	1/1:0,21:22:33:329,33,0	1/1:0,22:25:48:464,48,0	1/1:0,18:18:33:322,33,0	0/0:23,0:23:60:0,60,595	0/0:29,0:29:69:0,69,739	0/0:32,0:32:84:0,84,844
11	18518274	rs315519394	11:18518274	1/1:0,32:32:66:611,66,0	1/1:0,24:24:45:435,45,0	1/1:0,23:23:48:445,48,0	0/0:36,0:39:84:0,84,924	0/0:37,0:37:96:0,96,1034	0/0:23,0:23:57:0,57,632
11	18519250	rs14968540	11:18519250	0/0:23,0:24:60:0,60,614	0/0:22,0:22:60:0,60,621	0/0:25,0:25:66:0,66,709	1/1:0,35:35:84:842,84,0	1/1:0,40:40:99:1061,105,0	1/1:0,26:26:69:676,69,0
11	19021109	rs317832161	11:19021109	0/0:25,0:26:48:0,48,539	0/0:19,0:21:42:0,42,415	0/0:20,0:23:36:0,36,391	1/1:0,29:29:78:813,78,0	1/1:0,25:25:66:646,66,0	1/1:1,31:33:53:760,53,0
11	19023512	rs316201224	11:19023512	0/0:28,0:30:69:0,69,724	0/0:25,0:26:54:0,54,566	0/0:29,0:29:72:0,72,737	1/1:0,27:27:69:709,69,0	1/1:0,39:39:99:1040,105,0	1/1:0,25:25:75:744,75,0
12	748296	rs314762884	12:748296	0/0:29,0:30:66:0,66,675	0/0:36,0:36:99:0,102,1043	0/0:33,0:33:87:0,87,908	1/1:0,34:34:90:991,90,0	1/1:0,41:42:99:1145,105,0	1/1:0,41:41:99:1157,108,0
12	748341	rs312949935	12:748341	0/0:30,0:30:69:0,69,651	0/0:29,0:32:63:0,63,583	0/0:30,0:30:63:0,63,577	1/1:0,34:34:81:869,81,0	1/1:0,40:43:99:1066,99,0	1/1:0,44:45:99:1155,108,0
12	756434	rs316147787	12:756434	0/0:31,0:31:69:0,69,648	0/0:26,0:26:60:0,60,596	0/0:45,0:45:90:0,90,858	1/1:0,48:48:99:1264,123,0	1/1:0,42:42:99:1031,102,0	1/1:0,41:41:93:966,93,0
12	756452	rs312932704	12:756452	0/0:29,0:31:69:0,69,721	0/0:27,0:28:69:0,69,704	0/0:37,0:39:90:0,90,919	1/1:0,49:49:99:1245,132,0	1/1:0,42:42:99:954,99,0	1/1:0,43:43:99:950,99,0
12	756530	rs312316441	12:756530	0/0:43,0:46:99:0,120,1236	0/0:33,0:34:84:0,84,877	0/0:36,0:36:81:0,81,853	1/1:0,37:38:99:1092,102,0	1/1:0,38:38:87:914,87,0	1/1:0,37:37:93:1005,93,0
12	761742	rs314471005	12:761742	0/0:39,0:39:99:0,105,1087	0/0:33,0:34:84:0,84,852	0/0:28,0:30:69:0,69,704	1/1:0,36:37:99:1108,102,0	1/1:0,43:45:99:1112,105,0	1/1:0,33:35:99:1066,99,0
12	2245641	rs315194826	12:2245641	1/1:0,39:39:99:1059,99,0	1/1:0,29:30:81:854,81,0	1/1:0,21:21:57:585,57,0	0/0:35,0:35:90:0,90,872	0/0:36,0:37:99:0,99,965	0/0:43,0:43:99:0,126,1192
12	2246046	rs313910234	12:2246046	0/0:25,0:25:51:0,51,465	0/0:17,0:17:36:0,36,339	0/0:19,0:19:45:0,45,393	1/1:0,37:38:99:1155,105,0	1/1:0,39:39:99:1151,108,0	1/1:0,38:38:99:1071,102,0
12	2246625	rs315463185	12:2246625	0/0:26,0:26:54:0,54,563	0/0:20,0:20:45:0,45,453	0/0:28,0:31:72:0,72,742	1/1:0,37:37:99:1051,99,0	1/1:0,32:32:78:838,78,0	1/1:0,31:31:78:815,78,0
12	2252322	rs15632611	12:2252322	1/1:0,31:31:81:750,81,0	1/1:0,28:28:48:452,48,0	1/1:0,28:28:63:564,63,0	0/0:33,0:33:96:0,96,1038	0/0:43,0:43:99:0,114,1224	0/0:44,0:44:99:0,123,1345
12	3243162	rs317885489	12:3243162	0/0:37,0:37:96:0,96,1013	0/0:24,1:25:63:0,63,624	0/0:33,0:33:81:0,81,836	1/1:1,36:37:90:932,90,0	1/1:0,19:19:42:426,42,0	1/1:0,41:41:99:1145,108,0
12	3243213	rs312969223	12:3243213	0/0:40,0:41:69:0,69,694	0/0:23,0:24:63:0,63,640	0/0:34,0:35:87:0,87,834	1/1:1,31:32:87:940,87,0	1/1:0,30:30:78:878,78,0	1/1:0,42:42:99:1198,111,0
12	3243224	rs313246907	12:3243224	0/0:36,0:38:87:0,87,857	0/0:25,0:25:57:0,57,595	0/0:32,0:33:81:0,81,855	1/1:0,35:36:90:864,90,0	1/1:0,31:31:87:901,87,0	1/1:0,47:47:99:1241,126,0
12	3243255	rs316961033	12:3243255	0/0:31,2:33:57:0,57,590	0/0:26,0:26:60:0,60,592	0/0:34,0:34:87:0,87,858	1/1:1,34:35:96:1030,96,0	1/1:0,35:35:99:1083,99,0	1/1:0,40:41:99:1077,99,0
12	3280798	rs315957283	12:3280798	0/0:33,1:34:84:0,84,861	0/0:34,0:34:78:0,78,768	0/0:30,0:30:69:0,69,662	1/1:0,35:35:96:965,96,0	1/1:0,41:41:99:1143,111,0	1/1:0,50:50:99:1402,138,0
12	3281977	rs14972284	12:3281977	0/0:26,0:26:60:0,60,570	0/0:26,0:26:66:0,66,658	0/0:27,0:27:60:0,60,607	1/1:0,37:37:99:1098,102,0	1/1:0,29:29:69:726,69,0	1/1:0,33:33:96:1026,96,0
12	3285438	rs13785656	12:3285438	0/0:35,0:35:84:0,84,911	0/0:26,1:27:72:0,72,756	0/0:39,0:40:90:0,90,904	1/1:1,32:33:87:939,87,0	1/1:0,38:38:99:1041,99,0	1/1:0,37:37:96:1072,96,0
12	3457191	rs315577704	12:3457191	0/0:33,0:33:78:0,78,796	0/0:41,0:42:96:0,96,992	0/0:43,0:44:99:0,114,1140	1/1:0,46:46:99:1300,120,0	1/1:0,32:32:87:902,87,0	1/1:0,42:42:99:1358,126,0
12	3457226	rs314867854	12:3457226	0/0:32,0:33:84:0,84,863	0/0:36,0:36:84:0,84,837	0/0:41,1:43:90:0,90,953	1/1:0,44:44:99:933,99,0	1/1:0,33:34:81:777,81,0	1/1:0,40:40:99:1133,117,0
12	9752213	rs312496269	12:9752213	1/1:0,37:37:78:742,78,0	1/1:0,29:33:66:605,66,0	1/1:0,24:24:39:347,39,0	0/0:34,0:34:96:0,96,1029	0/0:54,0:55:99:0,141,1495	0/0:41,0:42:99:0,111,1185
12	9753759	rs317693842	12:9753759	1/1:0,27:30:57:622,57,0	1/1:0,27:28:66:686,66,0	1/1:0,22:23:57:566,57,0	0/0:35,0:36:96:0,96,895	0/0:49,0:49:99:0,117,1124	0/0:34,0:36:78:0,78,762
13	372941	rs312734068	13:372941	1/1:0,22:22:57:528,57,0	1/1:0,30:31:81:750,81,0	1/1:0,23:23:51:497,51,0	0/0:41,0:41:99:0,114,1181	0/0:46,1:47:89:0,89,1258	0/0:34,0:35:93:0,93,1010
13	377251	rs14049589	13:377251	0/0:31,3:34:69:0,69,679	0/0:22,1:23:51:0,51,507	0/0:36,1:37:72:0,72,745	1/1:0,42:43:99:1059,108,0	1/1:0,44:44:99:1080,111,0	1/1:0,39:39:99:1035,102,0
13	377426	rs314311829	13:377426	0/0:30,0:30:66:0,66,670	0/0:18,0:18:30:0,30,312	0/0:31,0:31:63:0,63,643	1/1:0,24:24:60:646,60,0	1/1:1,31:32:84:902,84,0	1/1:0,33:33:81:826,81,0
13	377443	rs316892817	13:377443	0/0:33,0:34:78:0,78,805	0/0:18,0:21:33:0,33,338	0/0:33,0:35:75:0,75,726	1/1:0,23:23:54:594,54,0	1/1:1,34:35:84:872,84,0	1/1:0,28:28:66:700,66,0
13	1301254	rs739334466	13:1301254	0/0:18,0:18:36:0,36,341	0/0:15,0:16:30:0,30,265	0/0:22,0:22:48:0,48,427	1/1:0,23:23:57:641,57,0	1/1:1,31:33:50:803,50,0	1/1:0,30:30:78:846,78,0
13	1301534	rs317337749	13:1301534	1/1:0,23:24:54:535,54,0	1/1:0,21:22:51:498,51,0	1/1:0,13:13:30:303,30,0	0/0:24,0:24:60:0,60,632	0/0:31,0:32:75:0,75,804	0/0:22,0:23:57:0,57,630
13	1413221	rs317044573	13:1413221	0/0:19,0:20:42:0,42,407	0/0:18,0:19:27:0,27,277	0/0:19,0:20:36:0,36,365	1/1:0,30:30:78:809,78,0	1/1:0,33:33:66:702,66,0	1/1:0,32:32:72:759,72,0
13	1413329	rs14993676	13:1413329	0/0:24,0:24:48:0,48,419	0/0:9,0:10:21:0,21,180	0/0:21,0:21:33:0,33,314	1/1:0,26:28:63:665,63,0	1/1:0,41:41:87:896,87,0	1/1:0,22:24:42:437,42,0
13	1413710	rs738922131	13:1413710	0/0:30,0:31:63:0,63,606	0/0:21,0:21:45:0,45,417	0/0:29,0:29:51:0,51,465	1/1:0,23:24:63:693,63,0	1/1:0,32:33:84:924,84,0	1/1:0,37:37:99:1090,102,0
13	1415803	rs312546594	13:1415803	0/0:26,0:26:63:0,63,570	0/0:30,0:33:66:0,66,592	0/0:23,0:23:48:0,48,444	1/1:0,27:29:63:673,63,0	1/1:0,27:28:60:646,60,0	1/1:0,31:32:75:810,75,0
13	1852719	rs737938933	13:1852719	0/0:24,0:24:45:0,45,425	0/0:25,0:25:60:0,60,605	0/0:16,0:16:42:0,42,432	1/1:0,47:48:99:1404,138,0	1/1:0,43:43:99:1143,111,0	1/1:0,41:42:99:1180,114,0
13	1852721	rs731905677	13:1852721	0/0:23,0:23:54:0,54,535	0/0:25,0:25:54:0,54,558	0/0:16,0:17:45:0,45,457	1/1:0,49:49:99:1386,126,0	1/1:0,43:43:99:1221,114,0	1/1:0,41:41:99:1225,114,0
13	1960990	rs313813256	13:1960990	0/0:31,0:31:69:0,69,681	0/0:28,0:29:72:0,72,654	0/0:28,0:28:60:0,60,542	1/1:0,27:28:63:706,63,0	1/1:0,35:36:93:1013,93,0	1/1:0,42:42:99:1330,120,0
13	2052285	rs316578388	13:2052285	0/0:43,0:44:99:0,120,1213	0/0:30,0:30:81:0,81,816	0/0:42,0:42:99:0,105,1068	1/1:1,28:29:72:705,72,0	1/1:0,32:33:90:869,90,0	1/1:0,32:33:78:739,78,0
13	9489776	rs15001089	13:9489776	0/0:33,0:34:78:0,78,793	0/0:22,0:22:57:0,57,578	0/0:25,0:25:51:0,51,475	1/1:1,31:32:69:696,69,0	1/1:1,42:43:87:1105,87,0	1/1:0,37:37:99:1050,99,0
13	9491922	rs734863847	13:9491922	0/0:20,0:20:60:0,60,619	0/0:17,0:17:39:0,39,386	0/0:21,0:21:51:0,51,503	1/1:0,25:26:60:643,60,0	1/1:0,36:37:87:922,87,0	1/1:0,25:26:54:598,54,0
13	9526784	rs739114970	13:9526784	0/0:32,0:32:66:0,66,615	0/0:30,0:31:72:0,72,664	0/0:32,0:32:69:0,69,633	1/1:0,25:26:63:669,63,0	1/1:0,44:44:99:1039,99,0	1/1:0,26:26:57:596,57,0
13	9527734	rs738674886	13:9527734	0/0:22,0:22:48:0,48,445	0/0:25,0:25:60:0,60,601	0/0:19,0:19:45:0,45,451	1/1:0,41:41:84:883,84,0	1/1:0,36:38:90:949,90,0	1/1:0,43:43:99:1051,99,0
13	9532872	rs29004818	13:9532872	0/0:30,0:31:78:0,78,708	0/0:15,0:16:33:0,33,296	0/0:24,0:24:63:0,63,601	1/1:0,33:34:78:809,78,0	1/1:0,33:33:78:851,78,0	1/1:0,30:31:72:779,72,0
13	9533187	rs29004819	13:9533187	0/0:32,1:34:84:0,84,879	0/0:19,0:19:45:0,45,502	0/0:23,1:24:57:0,57,619	1/1:0,28:28:75:798,75,0	1/1:0,37:37:99:1093,102,0	1/1:0,31:31:90:997,90,0
13	9533220	rs29004820	13:9533220	0/0:33,0:34:72:0,72,709	0/0:22,0:22:48:0,48,435	0/0:24,0:25:48:0,48,457	1/1:1,30:31:72:763,72,0	1/1:0,36:36:93:992,93,0	1/1:0,36:36:96:1028,96,0
13	9540475	rs316840221	13:9540475	1/1:0,28:30:48:431,48,0	1/1:0,18:19:42:380,42,0	1/1:0,22:22:42:401,42,0	0/0:30,0:30:75:0,75,799	0/0:31,0:31:78:0,78,838	0/0:36,0:36:81:0,81,874
13	9541715	rs317259243	13:9541715	0/0:6,0:10:9:0,9,88	0/0:6,1:8:9:0,9,89	0/0:6,0:8:9:0,9,94	1/1:0,4:10:9:96,9,0	1/1:0,8:10:12:124,12,0	1/1:0,7:9:18:192,18,0
13	9548477	rs731506523	13:9548477	0/0:16,0:16:21:0,21,202	0/0:18,0:18:45:0,45,432	0/0:16,0:17:39:0,39,350	1/1:0,27:27:66:719,66,0	1/1:0,27:27:66:723,66,0	1/1:0,32:32:78:862,78,0
13	9556955	rs80587134	13:9556955	1/1:1,24:26:57:614,57,0	1/1:0,30:30:72:735,72,0	1/1:0,13:13:24:233,24,0	0/0:32,0:32:78:0,78,739	0/0:36,0:36:81:0,81,794	0/0:29,0:30:84:0,84,811
13	9557397	rs733038898	13:9557397	0/0:27,0:27:63:0,63,588	0/0:29,0:29:54:0,54,498	0/0:18,0:18:30:0,30,291	1/1:0,22:23:54:563,54,0	1/1:0,38:39:90:972,90,0	1/1:0,32:32:72:743,72,0
13	9570517	rs317349268	13:9570517	0/0:38,0:40:84:0,84,773	0/0:26,0:27:57:0,57,523	0/0:34,0:36:69:0,69,608	1/1:0,36:36:90:1001,90,0	1/1:0,39:39:93:1016,93,0	1/1:0,45:45:99:1354,123,0
13	9571377	rs14994917	13:9571377	0/0:39,0:41:87:0,87,930	0/0:31,0:32:69:0,69,720	0/0:19,0:19:45:0,45,466	1/1:0,31:31:87:821,87,0	1/1:0,51:51:99:1253,132,0	1/1:0,28:30:66:622,66,0
13	9572105	rs316126333	13:9572105	0/0:31,0:32:72:0,72,733	0/0:36,0:36:93:0,93,951	0/0:31,0:31:87:0,87,898	1/1:0,31:32:84:902,84,0	1/1:0,38:39:96:989,96,0	1/1:1,38:39:73:997,73,0
13	9595870	rs737354000	13:9595870	1/1:0,24:25:48:440,48,0	1/1:0,17:17:21:191,21,0	1/1:0,33:35:63:588,63,0	0/0:29,0:29:81:0,81,859	0/0:30,0:31:87:0,87,969	0/0:34,0:34:90:0,90,976
13	9597362	rs313739988	13:9597362	0/0:30,0:31:78:0,78,786	0/0:17,0:18:42:0,42,429	0/0:18,0:18:45:0,45,445	1/1:0,31:31:75:770,75,0	1/1:0,36:37:93:992,93,0	1/1:0,23:23:69:714,69,0
13	9597569	rs14050010	13:9597569	0/0:39,0:39:90:0,90,816	0/0:16,0:16:36:0,36,327	0/0:26,0:26:54:0,54,520	1/1:0,20:20:54:602,54,0	1/1:0,44:45:99:1190,111,0	1/1:0,30:30:78:842,78,0
13	9598578	rs740631710	13:9598578	0/0:15,0:16:39:0,39,384	0/0:15,0:18:30:0,30,288	0/0:30,0:30:72:0,72,716	1/1:0,25:25:60:658,60,0	1/1:0,23:24:54:581,54,0	1/1:0,28:28:63:681,63,0
13	9605898	rs316553927	13:9605898	1/1:0,31:31:72:640,72,0	1/1:0,24:24:63:606,63,0	1/1:0,39:39:87:779,87,0	0/0:27,0:27:75:0,75,803	0/0:44,0:45:99:0,108,1185	0/0:39,0:41:84:0,84,912
13	9605966	rs732522580	13:9605966	1/1:0,38:38:87:872,87,0	1/1:0,31:31:84:838,84,0	1/1:0,42:43:99:1148,114,0	0/0:31,0:31:81:0,81,882	0/0:39,0:39:99:0,111,1228	0/0:37,0:37:90:0,90,945
13	9605967	rs735980538	13:9605967	1/1:0,36:37:78:762,78,0	1/1:0,31:31:78:808,78,0	1/1:0,43:43:99:1115,111,0	0/0:31,0:31:84:0,84,909	0/0:39,0:39:99:0,111,1181	0/0:37,0:37:90:0,90,951
14	4009489	rs315748754	14:4009489	0/0:29,0:30:69:0,69,693	0/0:30,1:32:56:0,56,800	0/0:25,0:25:57:0,57,615	1/1:0,34:34:81:883,81,0	1/1:0,33:33:90:928,90,0	1/1:0,29:29:78:834,78,0
14	4010413	rs314136300	14:4010413	0/0:27,0:29:69:0,69,746	0/0:37,0:40:84:0,84,900	0/0:41,0:41:96:0,96,1011	1/1:0,38:38:99:1062,99,0	1/1:0,51:51:99:1356,126,0	1/1:0,30:30:69:741,69,0
14	4010452	rs315075707	14:4010452	0/0:28,0:28:69:0,69,747	0/0:38,0:38:90:0,90,982	0/0:38,0:39:96:0,96,1003	1/1:0,34:36:84:868,84,0	1/1:0,45:45:99:1145,108,0	1/1:0,28:28:66:679,66,0
14	4010472	rs317713893	14:4010472	0/0:29,1:31:66:0,66,659	0/0:40,0:40:96:0,96,985	0/0:38,0:38:99:0,102,1040	1/1:1,41:42:99:1113,108,0	1/1:0,43:43:99:1233,114,0	1/1:0,30:31:81:860,81,0
14	4010511	rs315568006	14:4010511	0/0:31,0:32:78:0,78,808	0/0:29,0:31:72:0,72,761	0/0:31,0:32:72:0,72,741	1/1:2,38:40:99:1155,108,0	1/1:1,39:40:71:1025,71,0	1/1:1,34:35:84:890,84,0
14	4363349	rs736706323	14:4363349	1/1:0,32:32:69:716,69,0	1/1:0,18:19:39:374,39,0	1/1:0,21:24:51:547,51,0	0/0:29,0:29:81:0,81,841	0/0:32,0:32:84:0,84,919	0/0:27,0:27:72:0,72,771
14	4364661	rs315384368	14:4364661	1/1:0,11:11:21:207,21,0	1/1:0,9:9:21:199,21,0	1/1:0,9:11:18:177,18,0	0/0:14,0:14:36:0,36,392	0/0:15,0:15:39:0,39,430	0/0:21,0:21:51:0,51,521
14	5054818	rs314448475	14:5054818	1/1:0,20:21:45:459,45,0	1/1:0,19:23:54:553,54,0	1/1:0,23:25:51:518,51,0	0/0:22,0:22:54:0,54,538	0/0:40,0:40:93:0,93,956	0/0:23,0:23:60:0,60,626
14	5057066	rs315560932	14:5057066	1/1:0,21:21:48:455,48,0	1/1:0,19:19:48:452,48,0	1/1:0,26:26:57:531,57,0	0/0:34,0:35:72:0,72,795	0/0:24,1:26:54:0,54,569	0/0:27,0:27:63:0,63,687
14	5058070	rs735260738	14:5058070	0/0:23,1:24:51:0,51,557	0/0:13,0:13:33:0,33,356	0/0:22,1:23:48:0,48,515	1/1:0,31:31:81:836,81,0	1/1:0,29:29:75:737,75,0	1/1:0,31:31:72:717,72,0
14	5097085	rs317120385	14:5097085	0/0:26,0:28:57:0,57,602	0/0:30,0:30:57:0,57,612	0/0:31,0:31:78:0,78,772	1/1:1,34:35:90:974,90,0	1/1:0,46:46:99:1376,126,0	1/1:0,38:38:99:1043,99,0
14	5100582	rs15727457	14:5100582	1/1:0,26:26:60:595,60,0	1/1:0,28:28:66:697,66,0	1/1:0,31:31:78:810,78,0	0/0:36,0:36:99:0,99,1105	0/0:33,0:33:84:0,84,924	0/0:35,0:35:90:0,90,978
14	6915965	rs315959086	14:6915965	0/0:25,0:25:60:0,60,641	0/0:29,0:29:66:0,66,688	0/0:13,0:13:27:0,27,292	1/1:0,33:34:78:748,78,0	1/1:0,32:33:81:794,81,0	1/1:0,32:33:66:631,66,0
14	6916204	rs315583202	14:6916204	0/0:19,0:22:33:0,33,341	0/0:13,0:15:24:0,24,245	0/0:11,0:14:21:0,21,220	1/1:0,32:32:81:788,81,0	1/1:0,21:21:48:449,48,0	1/1:0,13:13:30:292,30,0
14	7357702	rs10724420	14:7357702	0/0:23,0:23:60:0,60,644	0/0:31,0:31:81:0,81,821	0/0:39,0:39:96:0,96,1010	1/1:0,30:32:78:830,78,0	1/1:0,36:37:90:975,90,0	1/1:0,44:44:99:1147,111,0
14	7357867	rs10724542	14:7357867	0/0:33,0:33:78:0,78,808	0/0:20,0:20:48:0,48,477	0/0:28,0:28:57:0,57,612	1/1:1,41:42:99:1126,108,0	1/1:0,38:38:99:1069,99,0	1/1:0,22:23:63:661,63,0
14	7358768	rs738754640	14:7358768	0/0:28,0:29:78:0,78,828	0/0:34,0:34:87:0,87,874	0/0:29,0:29:78:0,78,827	1/1:0,35:35:87:932,87,0	1/1:0,40:40:99:1106,102,0	1/1:0,33:33:78:831,78,0
14	7358769	rs740864383	14:7358769	0/0:28,0:29:72:0,72,773	0/0:33,0:34:72:0,72,741	0/0:29,0:29:72:0,72,766	1/1:0,32:33:87:911,87,0	1/1:0,38:40:96:1023,96,0	1/1:0,31:33:81:833,81,0
14	7667942	rs312461831	14:7667942	0/0:43,0:45:99:0,99,1045	0/0:22,0:22:48:0,48,532	0/0:37,0:39:90:0,90,935	1/1:0,48:50:99:1286,129,0	1/1:0,35:35:96:959,96,0	1/1:0,44:46:99:1172,114,0
14	7668857	rs314013334	14:7668857	1/1:0,30:30:69:699,69,0	1/1:0,29:29:72:746,72,0	1/1:1,43:44:99:1146,108,0	0/0:34,0:35:96:0,96,1040	0/0:52,0:52:99:0,138,1534	0/0:43,0:43:99:0,105,1140
14	7674651	rs313373752	14:7674651	0/0:31,0:31:81:0,81,853	0/0:25,0:27:69:0,69,736	0/0:24,0:24:66:0,66,693	1/1:0,33:33:87:902,87,0	1/1:0,24:25:63:647,63,0	1/1:0,38:38:90:934,90,0
14	7674709	rs315350302	14:7674709	0/0:31,0:31:75:0,75,705	0/0:26,0:26:69:0,69,641	0/0:35,0:35:78:0,78,728	1/1:0,34:34:96:1046,96,0	1/1:0,35:36:84:899,84,0	1/1:0,37:37:96:1030,96,0
14	8526938	rs315716449	14:8526938	1/1:0,38:38:99:1017,99,0	1/1:0,34:34:84:843,84,0	1/1:0,23:23:51:526,51,0	0/0:47,0:47:99:0,111,1105	0/0:43,0:44:99:0,105,989	0/0:48,0:48:99:0,108,1012
14	8527274	rs317213052	14:8527274	1/1:0,26:26:69:715,69,0	1/1:0,23:24:63:635,63,0	1/1:0,20:21:51:554,51,0	0/0:35,0:36:87:0,87,875	0/0:28,0:28:75:0,75,731	0/0:39,0:40:99:0,102,990
14	8538858	rs735305204	14:8538858	1/1:1,18:19:42:447,42,0	1/1:0,30:31:69:693,69,0	1/1:0,34:34:78:823,78,0	0/0:42,0:43:99:0,105,1074	0/0:49,0:49:99:0,123,1284	0/0:41,0:41:99:0,117,1181
14	8792291	rs3137556	14:8792291	1/1:0,40:40:99:1176,111,0	1/1:0,36:37:90:934,90,0	1/1:0,34:34:84:859,84,0	0/0:45,0:46:99:0,120,1157	0/0:28,0:28:54:0,54,541	0/0:37,0:38:96:0,96,907
14	8794784	rs15735190	14:8794784	1/1:0,25:27:45:446,45,0	1/1:0,28:30:57:546,57,0	1/1:0,28:28:39:392,39,0	0/0:37,0:37:81:0,81,875	0/0:56,1:60:99:0,114,1214	0/0:51,0:54:99:0,120,1325
14	8794837	rs15735192	14:8794837	1/1:1,22:25:48:468,48,0	1/1:2,22:26:29:447,29,0	1/1:0,21:21:39:392,39,0	0/0:21,1:29:33:0,33,326	0/0:38,2:48:34:0,34,627	0/0:43,3:60:63:0,63,660
14	8799779	rs15735195	14:8799779	1/1:0,27:27:63:560,63,0	1/1:0,32:33:78:711,78,0	1/1:0,37:38:78:715,78,0	0/0:54,0:55:99:0,147,1574	0/0:40,0:40:93:0,93,1000	0/0:41,0:41:99:0,111,1206
14	8800809	rs15735201	14:8800809	1/1:0,37:37:93:974,93,0	1/1:0,28:29:69:689,69,0	1/1:0,40:40:99:1100,108,0	0/0:41,0:41:99:0,108,1174	0/0:32,0:32:84:0,84,914	0/0:34,0:34:90:0,90,991
14	8800827	rs15735203	14:8800827	1/1:0,39:39:75:719,75,0	1/1:0,29:30:60:542,60,0	1/1:0,41:41:96:875,96,0	0/0:42,0:42:99:0,111,1206	0/0:32,0:32:66:0,66,724	0/0:32,0:32:87:0,87,968
14	8803985	rs313556758	14:8803985	1/1:0,40:40:87:840,87,0	1/1:0,25:26:66:688,66,0	1/1:0,25:27:66:645,66,0	0/0:34,0:35:90:0,90,951	0/0:41,0:41:99:0,114,1221	0/0:33,0:34:87:0,87,936
14	8808331	rs15735217	14:8808331	1/1:0,28:28:72:746,72,0	1/1:0,38:38:90:965,90,0	1/1:0,33:35:81:838,81,0	0/0:35,0:36:96:0,96,1071	0/0:37,0:38:99:0,105,1144	0/0:42,0:43:99:0,111,1251
14	9958300	rs314598967	14:9958300	1/1:0,31:31:84:869,84,0	1/1:0,34:34:90:901,90,0	1/1:0,36:37:81:818,81,0	0/0:41,0:41:99:0,105,1007	0/0:49,0:49:99:0,123,1208	0/0:48,0:50:99:0,117,1145
14	9968027	rs741059030	14:9968027	1/1:0,44:44:99:1157,114,0	1/1:0,22:22:54:550,54,0	1/1:0,43:43:99:1061,105,0	0/0:39,0:40:99:0,102,1020	0/0:46,0:46:99:0,111,1144	0/0:45,0:45:99:0,126,1296
14	10044449	rs739316002	14:10044449	1/1:0,25:26:63:623,63,0	1/1:0,23:23:57:581,57,0	1/1:0,32:32:72:740,72,0	0/0:36,0:37:93:0,93,890	0/0:46,0:46:99:0,111,1095	0/0:35,0:37:87:0,87,852
14	10044474	rs315358785	14:10044474	1/1:0,20:21:54:539,54,0	1/1:0,21:21:51:497,51,0	1/1:0,27:29:51:514,51,0	0/0:37,0:38:96:0,96,988	0/0:43,0:43:99:0,108,1116	0/0:34,0:35:93:0,93,968
14	10045112	rs735129320	14:10045112	1/1:0,22:23:48:462,48,0	1/1:0,32:32:66:640,66,0	1/1:0,37:37:78:781,78,0	0/0:30,0:30:75:0,75,831	0/0:33,0:33:81:0,81,875	0/0:33,0:33:81:0,81,895
14	10056393	rs29007296	14:10056393	1/1:0,25:26:60:609,60,0	1/1:0,19:20:45:465,45,0	1/1:0,26:29:60:601,60,0	0/0:34,0:34:81:0,81,773	0/0:47,0:47:99:0,114,1070	0/0:27,0:27:66:0,66,601
14	10056416	rs29007297	14:10056416	1/1:0,24:25:51:476,51,0	1/1:1,18:19:18:341,18,0	1/1:0,27:28:57:525,57,0	0/0:32,0:32:81:0,81,883	0/0:46,0:46:99:0,120,1302	0/0:29,0:29:75:0,75,784
14	10068939	rs314109281	14:10068939	1/1:0,29:29:72:790,72,0	1/1:0,25:25:48:498,48,0	1/1:0,26:27:75:770,75,0	0/0:34,0:34:90:0,90,977	0/0:45,0:45:99:0,114,1236	0/0:26,0:27:63:0,63,681
14	10068973	rs15738685	14:10068973	1/1:0,29:30:51:477,51,0	1/1:0,35:35:75:711,75,0	1/1:0,32:33:75:684,75,0	0/0:38,0:38:99:0,105,1144	0/0:45,0:45:99:0,129,1439	0/0:31,0:31:84:0,84,929
14	10104091	rs313765749	14:10104091	1/1:0,29:29:54:484,54,0	1/1:0,27:27:60:550,60,0	1/1:0,32:32:60:508,60,0	0/0:43,0:43:99:0,123,1365	0/0:48,0:49:99:0,138,1505	0/0:35,0:35:93:0,93,1028
14	10104241	rs738685677	14:10104241	1/1:0,40:40:78:770,78,0	1/1:0,32:32:63:596,63,0	1/1:0,29:29:63:583,63,0	0/0:41,1:42:99:0,114,1191	0/0:44,0:44:99:0,126,1372	0/0:40,1:43:99:0,111,1216
14	10104378	rs313290492	14:10104378	1/1:0,25:25:63:638,63,0	1/1:0,25:25:63:643,63,0	1/1:0,32:33:75:764,75,0	0/0:32,0:32:81:0,81,849	0/0:50,0:50:99:0,138,1469	0/0:45,1:46:99:0,129,1398
14	12044794	rs314411992	14:12044794	1/1:0,24:24:60:623,60,0	1/1:0,26:26:60:592,60,0	1/1:0,24:24:54:532,54,0	0/0:34,1:36:96:0,96,1069	0/0:28,0:28:78:0,78,867	0/0:26,0:27:75:0,75,810
14	12044948	rs317250226	14:12044948	1/1:0,23:24:57:570,57,0	1/1:0,13:13:30:292,30,0	1/1:0,23:24:54:552,54,0	0/0:21,0:22:54:0,54,591	0/0:27,0:27:72:0,72,772	0/0:31,0:31:87:0,87,958
14	12045062	rs14079391	14:12045062	1/1:0,25:25:48:441,48,0	1/1:0,16:16:24:210,24,0	1/1:0,18:18:39:373,39,0	0/0:23,0:23:69:0,69,760	0/0:36,0:36:93:0,93,1058	0/0:26,0:26:66:0,66,718
14	12326982	rs731983021	14:12326982	1/1:0,23:23:60:615,60,0	1/1:0,19:19:42:415,42,0	1/1:0,21:21:42:449,42,0	0/0:27,0:27:60:0,60,569	0/0:28,0:28:63:0,63,621	0/0:29,0:31:69:0,69,659
14	12327109	rs14079547	14:12327109	1/1:0,22:23:54:565,54,0	1/1:0,18:19:39:381,39,0	1/1:0,12:12:24:222,24,0	0/0:18,0:20:36:0,36,327	0/0:28,0:28:63:0,63,551	0/0:26,0:27:66:0,66,606
14	12456506	rs740513311	14:12456506	1/1:0,17:18:39:429,39,0	1/1:0,22:22:48:494,48,0	1/1:0,23:23:63:617,63,0	0/0:32,0:32:93:0,93,993	0/0:38,0:38:93:0,93,1010	0/0:35,0:35:96:0,96,1019
14	12459407	rs316185384	14:12459407	1/1:0,21:21:57:593,57,0	1/1:0,20:21:57:601,57,0	1/1:0,27:27:60:622,60,0	0/0:46,0:46:99:0,111,1207	0/0:35,0:35:93:0,93,1010	0/0:32,0:32:87:0,87,954
14	12473851	rs317047662	14:12473851	1/1:1,26:28:63:680,63,0	1/1:0,16:16:36:398,36,0	1/1:0,31:31:72:763,72,0	0/0:27,0:27:69:0,69,644	0/0:34,0:34:87:0,87,832	0/0:47,0:47:99:0,111,1085
14	12473997	rs10728795	14:12473997	1/1:0,31:34:72:751,72,0	1/1:0,34:35:87:884,87,0	1/1:0,27:27:60:638,60,0	0/0:31,0:31:75:0,75,824	0/0:41,0:41:99:0,111,1207	0/0:34,0:35:93:0,93,1000
14	12476047	rs316722303	14:12476047	1/1:0,27:28:57:598,57,0	1/1:0,23:24:57:594,57,0	1/1:0,27:28:63:632,63,0	0/0:33,0:33:87:0,87,837	0/0:32,0:32:84:0,84,837	0/0:41,0:41:99:0,102,952
14	12480800	rs316705531	14:12480800	1/1:0,36:37:87:867,87,0	1/1:0,28:28:72:743,72,0	1/1:0,25:27:66:649,66,0	0/0:36,0:36:93:0,93,867	0/0:26,0:26:69:0,69,655	0/0:31,0:31:81:0,81,782
15	1394821	rs314209449	15:1394821	1/1:0,33:33:66:637,66,0	1/1:0,19:19:36:378,36,0	1/1:0,23:24:60:608,60,0	0/0:40,0:42:99:0,105,1114	0/0:39,0:41:99:0,102,1103	0/0:30,1:32:75:0,75,769
15	1394830	rs317226162	15:1394830	1/1:0,33:33:72:701,72,0	1/1:0,17:17:27:282,27,0	1/1:0,21:21:51:504,51,0	0/0:40,0:40:87:0,87,808	0/0:41,0:41:99:0,111,1061	0/0:28,0:29:72:0,72,684
15	1394863	rs317282495	15:1394863	1/1:0,26:26:48:435,48,0	1/1:0,19:19:30:291,30,0	1/1:0,17:17:39:335,39,0	0/0:39,0:39:99:0,105,1182	0/0:42,0:42:99:0,108,1200	0/0:23,0:25:60:0,60,638
15	1394891	rs312453023	15:1394891	1/1:0,26:26:63:653,63,0	1/1:0,19:19:48:479,48,0	1/1:0,16:16:42:440,42,0	0/0:41,0:41:99:0,111,1187	0/0:39,0:39:99:0,111,1163	0/0:22,0:22:42:0,42,460
15	1395005	rs315102914	15:1395005	0/0:27,0:27:60:0,60,567	0/0:22,0:23:39:0,39,357	0/0:27,0:27:54:0,54,495	1/1:0,29:30:75:800,75,0	1/1:0,36:36:93:988,93,0	1/1:0,30:30:78:811,78,0
15	1449357	rs315570478	15:1449357	1/1:0,37:38:81:813,81,0	1/1:0,32:32:75:762,75,0	1/1:0,29:29:75:798,75,0	0/0:38,0:38:99:0,99,1061	0/0:32,0:32:75:0,75,845	0/0:33,0:34:84:0,84,879
15	1453105	rs318219225	15:1453105	0/0:39,0:39:99:0,99,1031	0/0:30,0:32:78:0,78,780	0/0:24,0:25:57:0,57,589	1/1:1,41:42:99:1102,102,0	1/1:1,52:53:99:1395,105,0	1/1:0,38:38:99:1149,108,0
15	2367643	rs13628859	15:2367643	1/1:0,18:18:24:251,24,0	1/1:0,43:44:69:710,69,0	1/1:0,22:23:51:546,51,0	0/0:34,0:38:78:0,78,829	0/0:29,0:30:72:0,72,758	0/0:38,0:38:99:0,111,1158
15	2444091	rs10730982	15:2444091	1/1:0,29:31:69:715,69,0	1/1:0,34:35:81:821,81,0	1/1:0,24:25:51:509,51,0	0/0:29,1:30:72:0,72,772	0/0:41,0:41:99:0,105,1167	0/0:42,0:42:99:0,108,1159
15	2457608	rs313882406	15:2457608	0/0:19,0:19:48:0,48,440	0/0:28,0:29:57:0,57,536	0/0:29,0:29:69:0,69,626	1/1:0,19:20:54:576,54,0	1/1:1,31:32:66:884,66,0	1/1:0,26:27:69:743,69,0
15	2563319	rs313491560	15:2563319	0/0:24,0:25:57:0,57,616	0/0:43,1:44:99:0,99,1071	0/0:32,0:33:78:0,78,807	1/1:0,37:37:99:1085,102,0	1/1:0,36:36:90:996,90,0	1/1:0,32:33:84:928,84,0
15	2564013	rs314174038	15:2564013	0/0:35,0:35:90:0,90,822	0/0:26,0:26:54:0,54,528	0/0:29,0:31:42:0,42,427	1/1:0,35:35:87:943,87,0	1/1:0,30:32:78:851,78,0	1/1:0,27:27:69:751,69,0
15	2603385	rs312646419	15:2603385	1/1:0,29:29:72:659,72,0	1/1:0,25:26:48:436,48,0	1/1:0,24:24:42:386,42,0	0/0:27,0:28:72:0,72,761	0/0:17,0:18:42:0,42,460	0/0:29,0:29:81:0,81,907
15	2612583	rs15765630	15:2612583	1/1:0,12:13:30:305,30,0	1/1:0,28:28:72:741,72,0	1/1:0,20:21:45:473,45,0	0/0:39,0:40:99:0,111,1196	0/0:37,0:37:90:0,90,984	0/0:27,0:27:72:0,72,776
15	2615266	rs317965721	15:2615266	1/1:0,22:22:60:645,60,0	1/1:0,19:19:45:451,45,0	1/1:0,34:34:96:1001,96,0	0/0:25,0:25:69:0,69,742	0/0:25,0:25:75:0,75,842	0/0:43,0:43:99:0,117,1268
15	2615847	rs10723008	15:2615847	1/1:0,46:46:99:1161,111,0	1/1:0,20:20:48:472,48,0	1/1:0,32:33:84:873,84,0	0/0:43,0:43:99:0,114,1225	0/0:31,0:32:90:0,90,966	0/0:32,0:32:78:0,78,853
15	2714031	rs315403245	15:2714031	0/0:26,1:27:69:0,69,701	0/0:28,0:28:66:0,66,664	0/0:22,0:22:60:0,60,607	1/1:0,38:38:99:1096,99,0	1/1:1,37:38:81:1130,81,0	1/1:0,40:40:99:1061,102,0
15	2724918	rs14088344	15:2724918	1/1:0,26:27:63:567,63,0	1/1:0,17:17:36:343,36,0	1/1:0,25:25:57:535,57,0	0/0:34,0:34:87:0,87,937	0/0:35,0:35:78:0,78,855	0/0:28,0:28:78:0,78,827
15	3770453	rs15767702	15:3770453	1/1:0,27:27:63:565,63,0	1/1:0,28:28:60:561,60,0	1/1:0,40:40:69:605,69,0	0/0:28,0:28:78:0,78,843	0/0:35,0:35:90:0,90,952	0/0:31,0:32:81:0,81,858
15	3770460	rs15767704	15:3770460	1/1:0,25:25:63:580,63,0	1/1:0,26:26:69:641,69,0	1/1:0,34:34:72:640,72,0	0/0:28,1:29:81:0,81,863	0/0:34,0:35:78:0,78,831	0/0:25,0:26:63:0,63,678
15	4912345	rs313869991	15:4912345	0/0:20,0:21:45:0,45,439	0/0:33,0:34:69:0,69,657	0/0:38,0:39:90:0,90,824	1/1:0,34:34:99:1103,99,0	1/1:0,36:36:99:1074,99,0	1/1:0,40:40:99:1101,102,0
15	4914098	rs317902064	15:4914098	0/0:41,0:42:99:0,108,1114	0/0:40,0:41:99:0,99,1026	0/0:32,0:32:87:0,87,910	1/1:0,33:33:93:989,93,0	1/1:0,39:41:99:1088,102,0	1/1:0,32:32:90:953,90,0
15	4914655	rs318076648	15:4914655	0/0:35,0:35:87:0,87,896	0/0:46,0:46:93:0,93,992	0/0:21,0:21:45:0,45,498	1/1:0,34:35:87:886,87,0	1/1:0,35:35:87:864,87,0	1/1:0,35:35:87:899,87,0
15	4925962	rs10729497	15:4925962	0/0:37,0:38:87:0,87,802	0/0:22,0:25:60:0,60,580	0/0:28,0:29:63:0,63,614	1/1:0,39:39:90:969,90,0	1/1:0,34:35:84:883,84,0	1/1:0,36:38:93:981,93,0
15	4928896	rs316223542	15:4928896	0/0:36,0:36:93:0,93,973	0/0:32,0:33:84:0,84,869	0/0:32,0:32:78:0,78,786	1/1:0,32:33:84:781,84,0	1/1:0,39:39:93:885,93,0	1/1:0,53:53:99:1135,120,0
15	5008832	rs312699302	15:5008832	0/0:31,0:32:78:0,78,845	0/0:35,0:35:84:0,84,896	0/0:30,0:30:87:0,87,923	1/1:0,41:41:99:1096,105,0	1/1:2,45:48:93:1216,93,0	1/1:0,36:38:99:1046,99,0
15	5016857	rs315967119	15:5016857	0/0:29,0:29:78:0,78,845	0/0:27,0:28:66:0,66,674	0/0:29,0:30:81:0,81,845	1/1:0,23:24:57:584,57,0	1/1:0,37:38:81:761,81,0	1/1:0,31:31:54:519,54,0
15	5017298	rs314488607	15:5017298	0/0:29,0:29:75:0,75,764	0/0:26,0:26:75:0,75,780	0/0:36,0:36:96:0,96,1018	1/1:0,37:37:84:879,84,0	1/1:0,30:31:66:703,66,0	1/1:0,47:47:99:1069,105,0
15	9085177	rs314127891	15:9085177	1/1:0,36:38:81:831,81,0	1/1:0,25:26:57:594,57,0	1/1:0,34:36:90:921,90,0	0/0:27,0:27:72:0,72,725	0/0:37,0:37:99:0,102,1032	0/0:43,0:44:99:0,111,1102
15	9085180	rs314965856	15:9085180	1/1:0,39:39:87:906,87,0	1/1:0,26:27:66:693,66,0	1/1:0,34:36:90:921,90,0	0/0:27,0:27:69:0,69,676	0/0:35,0:35:87:0,87,867	0/0:41,0:42:99:0,102,984
15	9444950	rs317129101	15:9444950	0/0:35,0:36:72:0,72,704	0/0:33,0:35:78:0,78,760	0/0:32,0:34:72:0,72,682	1/1:0,40:40:81:889,81,0	1/1:0,37:38:69:766,69,0	1/1:0,37:37:93:1006,93,0
15	9445572	rs313906092	15:9445572	0/0:29,0:29:72:0,72,741	0/0:26,0:26:72:0,72,737	0/0:21,0:22:45:0,45,464	1/1:0,40:40:99:1155,108,0	1/1:0,49:49:99:1442,132,0	1/1:0,36:36:99:1122,105,0
15	9445574	rs317805470	15:9445574	0/0:30,0:30:78:0,78,809	0/0:26,0:26:72:0,72,768	0/0:22,0:22:60:0,60,632	1/1:0,39:39:99:1176,111,0	1/1:0,48:48:99:1396,129,0	1/1:0,36:36:99:1176,108,0
15	9445775	rs312285061	15:9445775	0/0:37,0:37:78:0,78,767	0/0:35,0:36:84:0,84,873	0/0:26,0:26:69:0,69,735	1/1:0,30:32:81:885,81,0	1/1:0,42:42:99:1097,102,0	1/1:0,32:32:87:892,87,0
15	9468938	rs317185624	15:9468938	0/0:41,0:41:96:0,96,999	0/0:37,0:37:99:0,99,1026	0/0:23,0:23:54:0,54,547	1/1:0,33:33:81:861,81,0	1/1:0,33:33:87:967,87,0	1/1:0,35:35:99:1113,105,0
15	9567291	rs739009575	15:9567291	0/0:30,0:31:60:0,60,574	0/0:28,0:29:63:0,63,574	0/0:34,0:34:75:0,75,697	1/1:0,28:30:75:814,75,0	1/1:1,35:36:68:986,68,0	1/1:0,41:41:99:1187,111,0
15	9618613	rs316160122	15:9618613	1/1:0,37:39:84:762,84,0	1/1:0,28:29:48:440,48,0	1/1:0,29:29:60:564,60,0	0/0:36,0:36:99:0,99,1112	0/0:47,0:49:99:0,129,1410	0/0:37,0:37:99:0,105,1183
15	9640837	rs314283591	15:9640837	0/0:21,0:21:54:0,54,543	0/0:17,0:17:42:0,42,426	0/0:21,1:22:27:0,27,473	1/1:0,35:36:96:1052,96,0	1/1:0,31:31:87:978,87,0	1/1:0,37:37:99:1146,105,0
15	9641056	rs731271839	15:9641056	0/0:36,0:36:84:0,84,896	0/0:32,0:33:78:0,78,805	0/0:35,0:38:66:0,66,679	1/1:0,32:32:81:827,81,0	1/1:0,44:44:99:1216,120,0	1/1:0,43:43:99:1318,126,0
15	9641191	rs735841141	15:9641191	0/0:36,0:36:78:0,78,732	0/0:21,0:21:48:0,48,449	0/0:29,0:29:54:0,54,509	1/1:0,32:32:87:905,87,0	1/1:0,33:34:96:1016,96,0	1/1:0,42:42:99:1208,111,0
15	9641714	rs741561824	15:9641714	0/0:25,0:26:39:0,39,361	0/0:22,0:22:51:0,51,461	0/0:36,0:36:78:0,78,738	1/1:0,28:28:69:731,69,0	1/1:0,37:38:96:1038,96,0	1/1:0,43:44:99:1242,114,0
15	9642762	rs317482424	15:9642762	0/0:39,0:40:90:0,90,846	0/0:35,0:35:81:0,81,768	0/0:31,0:31:69:0,69,616	1/1:0,42:42:99:1295,120,0	1/1:0,33:33:87:940,87,0	1/1:0,41:42:99:1164,108,0
15	9643321	rs312676210	15:9643321	1/1:0,24:24:60:633,60,0	1/1:0,34:35:84:861,84,0	1/1:0,35:35:93:979,93,0	0/0:49,0:50:99:0,138,1476	0/0:48,0:48:99:0,123,1336	0/0:34,0:34:93:0,93,1002
15	9644825	rs3136877	15:9644825	0/0:31,0:31:87:0,87,917	0/0:22,0:22:48:0,48,507	0/0:16,1:18:48:0,48,503	1/1:0,27:28:57:580,57,0	1/1:0,26:27:63:648,63,0	1/1:0,27:28:60:625,60,0
15	9644921	rs3136876	15:9644921	0/0:27,0:27:63:0,63,667	0/0:23,0:23:57:0,57,616	0/0:32,0:32:78:0,78,823	1/1:0,35:35:90:854,90,0	1/1:0,33:34:81:770,81,0	1/1:0,33:33:90:857,90,0
15	10011131	rs316708297	15:10011131	0/0:22,0:23:36:0,36,329	0/0:13,0:13:27:0,27,237	0/0:23,0:25:42:0,42,391	1/1:1,17:18:39:427,39,0	1/1:0,32:34:78:849,78,0	1/1:0,18:19:51:567,51,0
15	10012341	rs313792025	15:10012341	0/0:25,0:25:60:0,60,555	0/0:27,0:28:63:0,63,602	0/0:24,0:25:51:0,51,499	1/1:0,27:27:69:745,69,0	1/1:0,38:38:99:1076,102,0	1/1:0,33:33:87:924,87,0
15	10012534	rs315003465	15:10012534	0/0:21,0:21:42:0,42,395	0/0:34,0:34:72:0,72,678	0/0:36,0:37:75:0,75,723	1/1:0,28:28:72:775,72,0	1/1:0,39:39:93:1036,93,0	1/1:0,36:36:96:1044,96,0
15	10013873	rs15024765	15:10013873	0/0:22,0:23:48:0,48,426	0/0:26,1:27:60:0,60,556	0/0:27,0:28:60:0,60,539	1/1:0,31:31:84:933,84,0	1/1:1,39:40:93:1014,93,0	1/1:0,31:31:81:858,81,0
15	11428996	rs15025956	15:11428996	0/0:25,0:25:54:0,54,487	0/0:13,0:13:18:0,18,175	0/0:16,0:17:30:0,30,268	1/1:0,16:16:33:336,33,0	1/1:0,33:33:78:810,78,0	1/1:0,26:27:60:644,60,0
15	11428999	rs15025957	15:11428999	0/0:24,0:25:60:0,60,555	0/0:14,0:14:30:0,30,301	0/0:17,0:17:27:0,27,258	1/1:0,12:13:27:285,27,0	1/1:0,32:32:87:951,87,0	1/1:0,27:27:69:755,69,0
15	11437377	rs14095978	15:11437377	0/0:32,0:33:78:0,78,723	0/0:18,0:18:30:0,30,295	0/0:33,0:33:72:0,72,684	1/1:0,30:30:78:807,78,0	1/1:0,38:38:87:934,87,0	1/1:0,26:26:63:648,63,0
15	11439100	rs316037190	15:11439100	0/0:26,0:28:66:0,66,687	0/0:35,0:35:84:0,84,902	0/0:27,0:27:72:0,72,759	1/1:0,34:34:84:890,84,0	1/1:0,44:44:99:1207,114,0	1/1:0,35:35:99:1070,99,0
15	11439324	rs15025977	15:11439324	0/0:29,0:29:69:0,69,717	0/0:28,0:28:66:0,66,666	0/0:27,0:28:57:0,57,580	1/1:0,33:33:84:900,84,0	1/1:0,41:41:99:1132,105,0	1/1:0,33:33:93:973,93,0
15	11447007	rs14742904	15:11447007	0/0:14,0:14:33:0,33,337	0/0:21,1:22:42:0,42,418	0/0:32,1:33:72:0,72,711	1/1:0,25:25:69:726,69,0	1/1:0,30:30:81:850,81,0	1/1:0,28:28:84:880,84,0
15	11447143	rs14742905	15:11447143	0/0:25,0:25:57:0,57,558	0/0:21,0:21:51:0,51,502	0/0:16,0:16:39:0,39,383	1/1:0,26:26:78:805,78,0	1/1:0,28:28:54:569,54,0	1/1:0,33:33:84:880,84,0
15	11447173	rs741684999	15:11447173	0/0:26,0:26:66:0,66,684	0/0:21,0:21:42:0,42,426	0/0:20,0:20:48:0,48,495	1/1:0,26:26:63:578,63,0	1/1:0,25:25:54:492,54,0	1/1:0,35:35:75:692,75,0
15	11449006	rs316093699	15:11449006	0/0:25,0:26:15:0,15,141	0/0:26,0:26:33:0,33,315	0/0:23,0:23:12:0,12,123	1/1:0,25:25:21:198,21,0	1/1:0,35:35:24:228,24,0	1/1:0,31:31:33:310,33,0
15	11449015	rs312985313	15:11449015	0/0:22,0:22:15:0,15,135	0/0:26,0:26:27:0,27,229	0/0:23,0:24:15:0,15,132	1/1:0,25:25:24:222,24,0	1/1:0,28:29:24:231,24,0	1/1:0,27:28:24:230,24,0
15	11450199	rs16086303	15:11450199	0/0:24,0:27:18:0,18,155	0/0:21,0:23:33:0,33,287	0/0:17,0:18:30:0,30,257	1/1:2,23:25:45:440,45,0	1/1:2,37:40:35:564,35,0	1/1:4,31:36:20:424,20,0
15	11450218	rs317486507	15:11450218	0/0:27,0:27:24:0,24,224	0/0:22,0:23:33:0,33,314	0/0:18,0:18:24:0,24,215	1/1:2,22:25:45:420,45,0	1/1:2,39:41:35:514,35,0	1/1:3,34:37:23:413,23,0
15	11451430	rs738971830	15:11451430	0/0:28,0:28:51:0,51,453	0/0:22,0:23:42:0,42,370	0/0:28,1:29:30:0,30,272	1/1:0,38:38:36:334,36,0	1/1:0,20:20:21:197,21,0	1/1:0,32:32:42:395,42,0
15	11451450	rs736338835	15:11451450	0/0:28,0:28:51:0,51,429	0/0:25,0:25:30:0,30,271	0/0:16,12:30:9:0,9,282	1/1:0,33:33:30:273,30,0	1/1:0,18:18:21:186,21,0	1/1:0,33:34:33:306,33,0
17	1503419	rs738700697	17:1503419	0/0:21,0:21:36:0,36,325	0/0:20,0:21:42:0,42,362	0/0:31,0:31:78:0,78,722	1/1:0,36:36:87:955,87,0	1/1:0,24:24:72:813,72,0	1/1:0,25:25:69:747,69,0
17	1504098	rs314459196	17:1504098	0/0:24,0:26:54:0,54,553	0/0:33,0:33:75:0,75,756	0/0:29,0:30:78:0,78,804	1/1:1,29:30:59:879,59,0	1/1:0,32:33:87:925,87,0	1/1:0,38:38:99:1104,102,0
17	1508146	rs15805760	17:1508146	1/1:0,49:50:99:1262,120,0	1/1:0,48:48:99:1297,123,0	1/1:0,34:37:78:808,78,0	0/0:46,0:46:99:0,120,1310	0/0:55,0:55:99:0,156,1678	0/0:45,0:46:99:0,120,1278
17	1537776	rs13734717	17:1537776	0/0:38,0:39:78:0,78,829	0/0:35,0:36:90:0,90,915	0/0:28,0:29:60:0,60,581	1/1:0,42:42:99:1242,114,0	1/1:0,44:44:99:1190,114,0	1/1:0,35:35:90:972,90,0
17	1542487	rs15034048	17:1542487	0/0:24,0:24:51:0,51,529	0/0:32,0:34:60:0,60,634	0/0:31,0:31:69:0,69,698	1/1:0,25:25:60:624,60,0	1/1:0,28:28:51:537,51,0	1/1:0,32:33:66:688,66,0
17	1555740	.	17:1555740	1/1:1,25:29:45:437,45,0	1/1:0,18:22:33:317,33,0	1/1:0,18:30:36:371,36,0	0/0:24,0:24:60:0,60,598	0/0:37,0:37:96:0,96,997	0/0:20,0:20:48:0,48,508
17	1555916	rs736850045	17:1555916	0/0:30,0:30:60:0,60,594	0/0:31,0:31:66:0,66,627	0/0:24,0:24:57:0,57,536	1/1:0,33:35:72:744,72,0	1/1:0,38:40:87:869,87,0	1/1:0,30:32:66:689,66,0
17	1555927	rs737655493	17:1555927	0/0:29,1:30:66:0,66,653	0/0:32,0:33:72:0,72,699	0/0:22,1:23:57:0,57,544	1/1:1,33:34:81:838,81,0	1/1:0,41:41:87:864,87,0	1/1:0,30:30:72:735,72,0
17	1558286	rs15033997	17:1558286	0/0:28,0:28:69:0,69,691	0/0:36,0:37:93:0,93,989	0/0:39,0:39:93:0,93,940	1/1:0,32:33:87:924,87,0	1/1:0,52:52:99:1519,144,0	1/1:0,28:29:75:789,75,0
17	5646822	rs15030798	17:5646822	0/0:32,0:33:69:0,69,745	0/0:18,0:19:33:0,33,329	0/0:31,0:32:69:0,69,730	1/1:0,29:30:78:829,78,0	1/1:0,33:33:78:817,78,0	1/1:0,35:35:96:1022,96,0
17	5646885	rs316744167	17:5646885	0/0:31,1:33:81:0,81,785	0/0:19,0:19:45:0,45,439	0/0:26,0:27:69:0,69,683	1/1:0,38:38:93:1022,93,0	1/1:0,44:44:99:1184,111,0	1/1:0,34:34:90:935,90,0
17	5646958	rs15030792	17:5646958	0/0:24,0:25:57:0,57,574	0/0:25,0:25:69:0,69,734	0/0:27,0:28:72:0,72,760	1/1:0,45:45:99:1250,123,0	1/1:0,48:48:99:1241,126,0	1/1:0,30:31:69:694,69,0
17	5647409	rs731108758	17:5647409	0/0:25,0:25:60:0,60,606	0/0:26,0:26:57:0,57,557	0/0:27,0:28:60:0,60,545	1/1:0,31:31:81:887,81,0	1/1:0,30:30:78:859,78,0	1/1:0,22:23:63:692,63,0
17	5647570	rs13774129	17:5647570	1/1:0,34:34:81:834,81,0	1/1:0,19:19:33:343,33,0	1/1:0,28:29:60:630,60,0	0/0:32,0:32:81:0,81,859	0/0:27,0:27:72:0,72,755	0/0:29,0:29:78:0,78,854
17	5647948	rs314305745	17:5647948	0/0:20,0:20:42:0,42,374	0/0:23,0:23:48:0,48,433	0/0:16,0:16:39:0,39,352	1/1:0,35:35:90:977,90,0	1/1:0,32:33:81:896,81,0	1/1:0,36:37:81:868,81,0
17	6248397	rs740179443	17:6248397	0/0:34,0:35:84:0,84,847	0/0:30,0:32:84:0,84,822	0/0:24,0:26:57:0,57,574	1/1:0,33:33:99:1083,99,0	1/1:0,58:58:99:1745,162,0	1/1:0,35:36:90:988,90,0
17	6248411	rs732701562	17:6248411	0/0:35,0:36:78:0,78,789	0/0:32,0:32:78:0,78,770	0/0:24,1:26:57:0,57,593	1/1:0,36:36:96:1001,96,0	1/1:1,59:62:99:1635,136,0	1/1:0,34:36:81:862,81,0
17	7059679	rs312958261	17:7059679	1/1:0,33:33:84:808,84,0	1/1:0,21:23:51:481,51,0	1/1:0,27:27:60:575,60,0	0/0:19,0:19:54:0,54,584	0/0:30,0:30:78:0,78,867	0/0:33,0:33:81:0,81,908
17	7063728	rs734592716	17:7063728	1/1:0,19:19:45:472,45,0	1/1:0,21:23:54:559,54,0	1/1:0,15:17:21:216,21,0	0/0:18,0:18:42:0,42,453	0/0:17,0:17:42:0,42,462	0/0:26,0:26:69:0,69,721
17	7125556	rs314319652	17:7125556	1/1:0,14:14:27:251,27,0	1/1:0,14:14:30:288,30,0	1/1:0,15:15:33:310,33,0	0/0:13,0:13:36:0,36,382	0/0:22,0:22:57:0,57,606	0/0:18,0:18:42:0,42,429
17	7711535	rs317861809	17:7711535	0/0:26,0:27:57:0,57,603	0/0:26,0:27:63:0,63,651	0/0:37,0:37:69:0,69,703	1/1:1,28:30:63:679,63,0	1/1:1,41:43:99:1178,108,0	1/1:0,28:28:81:893,81,0
17	7711540	rs313034377	17:7711540	0/0:27,0:28:66:0,66,685	0/0:26,0:26:78:0,78,776	0/0:35,1:36:81:0,81,821	1/1:0,30:30:66:714,66,0	1/1:2,41:43:99:1132,108,0	1/1:0,28:28:75:799,75,0
17	7897246	rs741071352	17:7897246	0/0:39,1:40:90:0,90,877	0/0:34,0:34:75:0,75,716	0/0:40,0:40:93:0,93,922	1/1:3,37:40:84:843,84,0	1/1:1,38:39:96:1041,96,0	1/1:1,31:33:81:844,81,0
17	7904625	rs317904596	17:7904625	1/1:0,27:27:66:687,66,0	1/1:0,21:22:42:432,42,0	1/1:1,20:21:19:405,19,0	0/0:34,0:34:81:0,81,808	0/0:27,0:27:66:0,66,618	0/0:34,0:34:72:0,72,700
17	8202013	rs317464008	17:8202013	0/0:36,0:36:87:0,87,887	0/0:37,0:37:93:0,93,961	0/0:40,0:41:93:0,93,945	1/1:0,31:31:81:861,81,0	1/1:0,36:36:96:1035,96,0	1/1:0,30:30:78:825,78,0
17	8202025	rs318147111	17:8202025	0/0:36,0:36:93:0,93,965	0/0:38,0:38:87:0,87,914	0/0:38,0:38:81:0,81,790	1/1:0,32:33:78:828,78,0	1/1:0,36:36:90:981,90,0	1/1:0,32:32:84:914,84,0
17	8202648	rs15028072	17:8202648	0/0:23,0:23:54:0,54,491	0/0:22,0:23:57:0,57,519	0/0:36,0:37:87:0,87,820	1/1:0,35:36:96:1052,96,0	1/1:0,38:38:99:1107,102,0	1/1:0,36:37:99:1164,105,0
18	5039437	rs29004878	18:5039437	1/1:0,16:16:36:325,36,0	1/1:0,21:21:39:370,39,0	1/1:0,21:21:54:508,54,0	0/0:26,0:27:69:0,69,737	0/0:37,0:37:99:0,99,1095	0/0:36,0:37:99:0,102,1121
18	5039966	rs29004879	18:5039966	1/1:0,29:30:39:354,39,0	1/1:0,19:19:33:284,33,0	1/1:0,27:28:39:336,39,0	0/0:32,0:32:81:0,81,839	0/0:40,0:41:99:0,102,1037	0/0:45,0:45:99:0,123,1296
18	5071223	rs14110910	18:5071223	1/1:0,30:31:72:763,72,0	1/1:0,36:37:84:912,84,0	1/1:0,30:31:81:870,81,0	0/0:50,0:50:99:0,120,1188	0/0:39,0:39:99:0,105,1019	0/0:46,0:46:99:0,111,1123
18	5075559	rs317295507	18:5075559	1/1:0,22:22:60:617,60,0	1/1:0,23:23:57:603,57,0	1/1:0,32:32:69:723,69,0	0/0:38,0:38:99:0,105,1145	0/0:45,0:45:99:0,129,1330	0/0:39,0:39:99:0,105,1109
18	5075565	rs314508701	18:5075565	1/1:0,25:25:66:657,66,0	1/1:0,25:26:63:677,63,0	1/1:0,30:30:63:627,63,0	0/0:36,0:36:99:0,102,1085	0/0:47,0:47:99:0,129,1335	0/0:39,0:39:90:0,90,947
18	5076954	rs794705823	18:5076954	1/1:0,24:25:66:661,66,0	1/1:0,33:34:84:895,84,0	1/1:0,34:34:87:895,87,0	0/0:27,0:29:75:0,75,784	0/0:43,0:44:99:0,114,1233	0/0:45,0:46:99:0,132,1502
18	5077002	rs793978315	18:5077002	1/1:0,24:24:51:476,51,0	1/1:0,28:28:72:691,72,0	1/1:0,27:28:63:570,63,0	0/0:28,0:28:78:0,78,869	0/0:33,0:34:84:0,84,963	0/0:41,1:42:84:0,84,1142
18	5078971	rs740107855	18:5078971	1/1:0,38:40:93:976,93,0	1/1:0,32:34:84:866,84,0	1/1:1,36:37:69:933,69,0	0/0:35,0:35:99:0,102,1102	0/0:44,0:45:99:0,120,1304	0/0:37,0:37:93:0,93,975
18	5079153	rs733417744	18:5079153	1/1:0,23:23:63:645,63,0	1/1:0,40:40:90:942,90,0	1/1:0,31:31:69:689,69,0	0/0:30,0:30:84:0,84,911	0/0:29,0:29:72:0,72,771	0/0:38,0:38:99:0,99,1046
18	5079198	rs741356665	18:5079198	1/1:0,23:23:54:579,54,0	1/1:0,39:39:99:1069,102,0	1/1:0,29:32:78:807,78,0	0/0:26,0:26:72:0,72,741	0/0:39,0:39:96:0,96,1029	0/0:37,0:37:99:0,105,1136
18	5806460	rs317147724	18:5806460	1/1:0,39:41:99:984,99,0	1/1:1,33:34:72:727,72,0	1/1:0,38:38:99:994,99,0	0/0:44,0:44:99:0,120,1323	0/0:43,0:43:99:0,111,1196	0/0:44,0:44:99:0,108,1171
18	5806743	rs14111703	18:5806743	1/1:0,36:36:87:815,87,0	1/1:0,27:27:60:548,60,0	1/1:1,19:20:33:305,33,0	0/0:36,1:37:99:0,99,1095	0/0:39,1:40:99:0,114,1254	0/0:44,0:44:99:0,117,1304
18	5808342	rs14111716	18:5808342	1/1:0,34:34:84:896,84,0	1/1:0,32:33:93:945,93,0	1/1:0,47:47:99:1229,123,0	0/0:47,0:47:99:0,132,1447	0/0:50,0:50:99:0,141,1536	0/0:40,0:41:99:0,108,1218
18	5808511	rs14111718	18:5808511	1/1:0,33:33:84:880,84,0	1/1:0,27:27:72:741,72,0	1/1:0,31:31:75:790,75,0	0/0:29,0:29:66:0,66,678	0/0:50,0:52:99:0,141,1388	0/0:43,0:43:99:0,114,1123
18	5808537	rs14111719	18:5808537	1/1:0,40:43:99:1153,111,0	1/1:0,25:26:69:694,69,0	1/1:0,34:34:78:801,78,0	0/0:33,0:33:90:0,90,961	0/0:48,0:48:99:0,132,1441	0/0:39,0:39:99:0,108,1169
18	5808579	rs14111720	18:5808579	1/1:0,37:37:93:993,93,0	1/1:0,25:26:63:646,63,0	1/1:0,34:35:87:895,87,0	0/0:31,0:31:84:0,84,906	0/0:50,0:52:99:0,138,1469	0/0:37,0:37:93:0,93,1042
18	5808696	rs14111721	18:5808696	1/1:0,30:31:78:806,78,0	1/1:0,36:36:93:962,93,0	1/1:0,28:28:57:582,57,0	0/0:34,0:35:87:0,87,902	0/0:43,0:44:99:0,120,1260	0/0:32,0:33:84:0,84,902
18	5808845	rs317391504	18:5808845	1/1:0,35:36:87:927,87,0	1/1:0,29:29:81:821,81,0	1/1:0,34:34:81:809,81,0	0/0:32,0:32:87:0,87,922	0/0:38,0:39:99:0,108,1192	0/0:47,0:47:99:0,126,1415
18	5808849	rs734404830	18:5808849	1/1:0,31:32:75:783,75,0	1/1:0,28:28:60:637,60,0	1/1:0,34:34:78:817,78,0	0/0:32,0:32:87:0,87,931	0/0:40,0:40:99:0,114,1264	0/0:46,0:46:99:0,126,1383
18	5808884	rs737829930	18:5808884	1/1:0,31:31:84:908,84,0	1/1:0,32:32:87:914,87,0	1/1:0,32:32:96:999,96,0	0/0:36,0:36:93:0,93,883	0/0:37,0:37:99:0,102,981	0/0:43,0:44:99:0,102,1006
18	5809148	rs315601352	18:5809148	1/1:0,29:29:72:708,72,0	1/1:0,23:23:51:501,51,0	1/1:0,28:28:66:648,66,0	0/0:28,0:28:72:0,72,756	0/0:37,0:38:93:0,93,1035	0/0:41,0:43:99:0,105,1109
18	5809173	rs15040123	18:5809173	1/1:0,31:31:84:861,84,0	1/1:0,22:22:60:634,60,0	1/1:0,30:30:63:632,63,0	0/0:31,0:31:87:0,87,957	0/0:43,0:43:99:0,123,1360	0/0:42,0:42:99:0,105,1143
18	5809468	rs15040125	18:5809468	1/1:0,25:25:60:622,60,0	1/1:0,27:28:69:759,69,0	1/1:0,28:28:63:643,63,0	0/0:28,0:28:81:0,81,856	0/0:42,0:43:99:0,108,1136	0/0:34,0:34:90:0,90,921
18	8058584	rs313499259	18:8058584	0/0:28,0:29:63:0,63,669	0/0:21,0:21:51:0,51,534	0/0:26,0:26:54:0,54,551	1/1:0,38:39:99:957,99,0	1/1:0,32:32:81:776,81,0	1/1:0,33:33:90:851,90,0
18	8059714	rs316951227	18:8059714	0/0:42,0:42:99:0,102,1092	0/0:24,0:25:63:0,63,673	0/0:30,0:31:84:0,84,891	1/1:0,36:36:99:1051,99,0	1/1:0,50:50:99:1512,141,0	1/1:0,43:43:99:1219,114,0
18	10141733	rs10721977	18:10141733	1/1:1,28:30:78:834,78,0	1/1:2,26:29:69:727,69,0	1/1:1,24:25:66:657,66,0	0/0:34,0:34:93:0,93,890	0/0:29,0:29:69:0,69,661	0/0:37,0:38:96:0,96,925
18	10142100	rs313579846	18:10142100	0/0:25,0:25:69:0,69,707	0/0:30,1:31:72:0,72,734	0/0:35,0:35:84:0,84,826	1/1:1,31:32:87:931,87,0	1/1:2,38:40:90:968,90,0	1/1:1,39:40:81:862,81,0
19	3208051	rs15841635	19:3208051	1/1:0,23:25:63:567,63,0	1/1:0,20:22:42:401,42,0	1/1:0,19:19:39:357,39,0	0/0:31,0:31:84:0,84,891	0/0:36,0:36:99:0,102,1124	0/0:34,0:36:87:0,87,922
19	3208102	rs740051484	19:3208102	1/1:0,29:30:66:673,66,0	1/1:0,22:23:42:471,42,0	1/1:0,16:17:36:367,36,0	0/0:26,0:26:66:0,66,615	0/0:28,0:28:54:0,54,505	0/0:21,0:22:54:0,54,506
19	5351961	rs431898707	19:5351961	0/0:28,0:29:72:0,72,728	0/0:20,0:20:48:0,48,501	0/0:37,0:38:87:0,87,888	1/1:0,33:34:87:941,87,0	1/1:1,36:38:99:1136,105,0	1/1:0,35:36:93:1001,93,0
19	5355658	rs431878499	19:5355658	0/0:35,0:35:78:0,78,765	0/0:39,0:39:81:0,81,809	0/0:32,0:34:75:0,75,750	1/1:0,36:36:93:979,93,0	1/1:0,40:41:99:1141,108,0	1/1:0,42:44:99:1157,111,0
19	5356026	rs13574977	19:5356026	0/0:32,0:32:84:0,84,877	0/0:23,0:24:60:0,60,628	0/0:27,0:27:63:0,63,690	1/1:0,21:21:54:539,54,0	1/1:0,36:36:93:999,93,0	1/1:0,33:34:90:939,90,0
19	5356052	rs14120724	19:5356052	0/0:28,0:31:69:0,69,695	0/0:25,0:25:60:0,60,590	0/0:29,0:30:69:0,69,728	1/1:0,19:19:45:455,45,0	1/1:0,34:34:87:910,87,0	1/1:0,33:33:90:914,90,0
19	5356062	rs13574978	19:5356062	0/0:29,0:30:63:0,63,636	0/0:26,0:26:63:0,63,631	0/0:32,0:32:81:0,81,868	1/1:0,20:20:39:417,39,0	1/1:0,31:31:87:944,87,0	1/1:0,38:38:93:967,93,0
19	5356080	rs13574980	19:5356080	0/0:26,0:26:45:0,45,423	0/0:25,0:26:57:0,57,531	0/0:31,0:32:69:0,69,677	1/1:0,22:22:45:452,45,0	1/1:0,29:30:78:825,78,0	1/1:0,34:36:90:918,90,0
19	5357301	rs15846830	19:5357301	0/0:38,0:39:75:0,75,697	0/0:31,0:32:72:0,72,666	0/0:21,0:21:51:0,51,451	1/1:0,40:40:99:1180,111,0	1/1:0,42:42:99:1363,120,0	1/1:0,42:42:99:1211,111,0
19	6655801	rs734017742	19:6655801	0/0:32,0:32:69:0,69,693	0/0:25,0:25:57:0,57,587	0/0:37,0:38:75:0,75,742	1/1:0,36:37:99:1097,102,0	1/1:0,41:41:99:1175,111,0	1/1:0,30:30:78:822,78,0
19	6658653	rs10730629	19:6658653	0/0:26,0:26:51:0,51,521	0/0:27,0:27:66:0,66,661	0/0:20,0:20:42:0,42,404	1/1:0,32:32:90:982,90,0	1/1:0,44:44:99:1120,102,0	1/1:0,42:42:99:1180,108,0
19	6658756	rs10731623	19:6658756	1/1:0,29:29:54:466,54,0	1/1:0,24:24:48:440,48,0	1/1:0,20:20:54:476,54,0	0/0:33,0:34:81:0,81,857	0/0:33,0:34:90:0,90,940	0/0:31,0:32:75:0,75,806
19	6791028	rs10728157	19:6791028	0/0:40,0:41:93:0,93,852	0/0:27,0:27:54:0,54,496	0/0:30,0:32:66:0,66,631	1/1:0,44:44:99:1200,114,0	1/1:0,44:44:99:1148,108,0	1/1:0,46:46:99:1289,117,0
19	6791400	rs431839773	19:6791400	0/0:35,0:35:72:0,72,664	0/0:39,0:40:96:0,96,880	0/0:25,0:26:51:0,51,487	1/1:0,37:37:90:974,90,0	1/1:0,50:51:99:1465,132,0	1/1:0,56:57:99:1608,147,0
19	6791407	rs431898539	19:6791407	0/0:32,0:33:81:0,81,831	0/0:37,0:37:87:0,87,872	0/0:25,0:26:51:0,51,508	1/1:0,36:36:99:1061,99,0	1/1:0,49:49:99:1251,114,0	1/1:0,56:56:99:1552,144,0
19	6793700	rs315476644	19:6793700	0/0:21,0:21:57:0,57,554	0/0:22,0:22:60:0,60,610	0/0:29,0:29:81:0,81,809	1/1:0,36:38:99:1060,99,0	1/1:0,36:37:96:1040,96,0	1/1:0,21:22:42:455,42,0
19	6797940	rs431830305	19:6797940	0/0:26,0:26:63:0,63,609	0/0:18,0:18:39:0,39,396	0/0:28,1:29:63:0,63,644	1/1:0,26:26:69:742,69,0	1/1:0,17:17:51:546,51,0	1/1:0,31:31:84:927,84,0
19	6798175	rs431830398	19:6798175	1/1:0,32:33:78:744,78,0	1/1:0,22:22:45:412,45,0	1/1:0,18:18:42:382,42,0	0/0:28,0:28:72:0,72,772	0/0:30,0:30:66:0,66,678	0/0:30,0:31:69:0,69,741
19	6800454	rs732223316	19:6800454	0/0:27,0:27:63:0,63,585	0/0:32,0:33:84:0,84,830	0/0:30,0:30:72:0,72,713	1/1:0,23:24:60:622,60,0	1/1:0,27:29:63:646,63,0	1/1:0,31:32:78:857,78,0
19	6800742	rs740320427	19:6800742	0/0:23,0:23:60:0,60,622	0/0:32,1:34:78:0,78,808	0/0:36,0:37:84:0,84,878	1/1:0,36:36:99:1082,102,0	1/1:0,25:26:57:574,57,0	1/1:0,42:42:93:998,93,0
19	6800970	rs431896627	19:6800970	0/0:26,0:27:69:0,69,709	0/0:21,0:21:48:0,48,483	0/0:23,0:24:54:0,54,529	1/1:0,36:36:93:887,93,0	1/1:0,40:40:99:992,102,0	1/1:0,29:29:75:724,75,0
19	6987215	rs15850512	19:6987215	1/1:0,29:29:57:600,57,0	1/1:0,23:24:39:405,39,0	1/1:0,22:22:60:627,60,0	0/0:36,0:36:99:0,102,1126	0/0:32,0:32:93:0,93,994	0/0:34,0:34:84:0,84,901
19	6988512	rs15850523	19:6988512	1/1:0,29:29:78:769,78,0	1/1:0,23:25:45:451,45,0	1/1:0,24:24:60:608,60,0	0/0:26,0:26:72:0,72,776	0/0:36,0:36:99:0,99,1068	0/0:38,0:39:99:0,105,1162
19	7398739	rs431850238	19:7398739	0/0:29,0:29:63:0,63,668	0/0:31,0:31:69:0,69,745	0/0:32,0:33:69:0,69,719	1/1:0,38:38:99:897,99,0	1/1:0,40:40:96:898,96,0	1/1:0,33:33:66:595,66,0
19	7398875	rs431896278	19:7398875	0/0:37,0:37:87:0,87,875	0/0:31,0:32:87:0,87,891	0/0:39,0:39:99:0,99,1016	1/1:0,28:31:66:724,66,0	1/1:0,47:47:99:1393,129,0	1/1:0,44:44:99:1241,117,0
19	7470778	rs431851489	19:7470778	0/0:30,3:33:63:0,63,681	0/0:24,1:25:54:0,54,530	0/0:22,1:23:60:0,60,601	1/1:0,31:31:81:760,81,0	1/1:0,32:32:81:759,81,0	1/1:0,34:34:78:745,78,0
19	7472409	rs15852006	19:7472409	0/0:57,0:58:99:0,138,1468	0/0:38,0:38:96:0,96,1012	0/0:24,0:24:66:0,66,704	1/1:0,43:44:99:1274,120,0	1/1:0,50:52:99:1449,135,0	1/1:0,49:49:99:1380,132,0
20	500307	rs740827520	20:500307	0/0:28,0:30:72:0,72,758	0/0:36,0:36:87:0,87,926	0/0:29,0:31:72:0,72,759	1/1:0,38:38:87:794,87,0	1/1:0,49:49:99:1201,129,0	1/1:0,35:35:84:768,84,0
20	505800	rs13630536	20:505800	0/0:37,0:37:81:0,81,830	0/0:34,0:34:84:0,84,817	0/0:39,1:41:87:0,87,867	1/1:1,35:36:81:844,81,0	1/1:0,39:42:93:985,93,0	1/1:0,49:50:99:1204,114,0
20	598448	rs10728964	20:598448	0/0:31,0:31:57:0,57,487	0/0:22,0:23:54:0,54,498	0/0:30,0:30:66:0,66,626	1/1:0,32:32:81:866,81,0	1/1:0,35:36:81:885,81,0	1/1:0,44:45:99:1148,108,0
20	598634	rs314608551	20:598634	0/0:26,0:27:63:0,63,694	0/0:32,0:32:78:0,78,802	0/0:33,0:33:78:0,78,839	1/1:0,44:44:99:1215,114,0	1/1:0,43:44:99:1367,126,0	1/1:0,28:28:78:786,78,0
20	599063	rs15169017	20:599063	0/0:29,0:30:51:0,51,502	0/0:21,0:21:45:0,45,424	0/0:26,0:27:48:0,48,431	1/1:0,31:32:84:900,84,0	1/1:0,37:38:99:1059,102,0	1/1:0,41:41:99:1205,111,0
20	599346	rs16158060	20:599346	1/1:0,43:44:93:886,93,0	1/1:0,36:36:72:651,72,0	1/1:0,30:31:69:630,69,0	0/0:37,0:38:90:0,90,960	0/0:38,0:39:93:0,93,1007	0/0:45,0:46:99:0,123,1319
20	652005	rs739616046	20:652005	1/1:0,33:34:81:850,81,0	1/1:1,28:29:66:690,66,0	1/1:0,37:37:81:849,81,0	0/0:25,0:25:66:0,66,626	0/0:46,0:46:99:0,117,1121	0/0:29,0:29:66:0,66,630
20	660631	rs16158124	20:660631	1/1:0,22:24:39:414,39,0	1/1:0,28:30:51:505,51,0	1/1:0,31:33:57:596,57,0	0/0:42,0:42:99:0,108,1183	0/0:44,0:44:99:0,117,1270	0/0:28,0:28:78:0,78,834
20	660648	rs16158125	20:660648	1/1:0,25:26:66:673,66,0	1/1:0,25:25:51:505,51,0	1/1:0,28:29:63:634,63,0	0/0:39,0:40:96:0,96,1059	0/0:44,0:45:99:0,126,1355	0/0:26,0:26:75:0,75,805
20	661111	rs314927435	20:661111	1/1:0,21:21:48:460,48,0	1/1:0,29:29:69:687,69,0	1/1:0,26:26:72:725,72,0	0/0:27,0:29:75:0,75,812	0/0:34,0:34:96:0,96,1047	0/0:30,0:30:81:0,81,906
20	736628	rs16158199	20:736628	1/1:0,37:37:90:920,90,0	1/1:0,29:29:78:774,78,0	1/1:0,21:21:57:555,57,0	0/0:31,0:31:81:0,81,858	0/0:37,0:37:99:0,102,1077	0/0:30,0:30:78:0,78,852
20	739728	rs313390081	20:739728	1/1:0,24:24:57:591,57,0	1/1:0,31:32:69:695,69,0	1/1:0,23:23:60:588,60,0	0/0:27,0:27:69:0,69,752	0/0:32,0:32:87:0,87,937	0/0:42,0:42:99:0,114,1195
20	865909	rs318068088	20:865909	0/0:33,0:34:84:0,84,826	0/0:27,0:27:60:0,60,618	0/0:28,0:28:57:0,57,549	1/1:0,36:36:96:1014,96,0	1/1:0,46:46:99:1348,126,0	1/1:0,28:28:75:829,75,0
20	866076	rs314112029	20:866076	0/0:33,0:33:84:0,84,859	0/0:38,0:38:96:0,96,1020	0/0:25,0:25:66:0,66,705	1/1:0,36:36:99:1035,99,0	1/1:0,28:28:69:736,69,0	1/1:0,33:33:93:987,93,0
20	866260	rs316786305	20:866260	0/0:28,0:29:69:0,69,715	0/0:30,0:31:63:0,63,684	0/0:33,0:33:87:0,87,929	1/1:0,34:34:84:888,84,0	1/1:0,39:39:99:1084,102,0	1/1:0,34:35:87:892,87,0
20	866566	rs315095608	20:866566	1/1:0,35:35:78:770,78,0	1/1:0,30:30:72:714,72,0	1/1:0,27:27:57:573,57,0	0/0:30,0:30:84:0,84,901	0/0:42,0:43:99:0,108,1166	0/0:31,0:31:75:0,75,802
20	877384	rs15169226	20:877384	0/0:42,0:43:99:0,117,1181	0/0:31,0:32:81:0,81,828	0/0:31,0:32:78:0,78,810	1/1:0,33:33:84:897,84,0	1/1:0,47:47:99:1324,126,0	1/1:0,55:56:99:1600,147,0
20	899515	rs317004387	20:899515	0/0:31,0:32:81:0,81,833	0/0:20,0:20:48:0,48,492	0/0:34,0:34:81:0,81,836	1/1:0,44:44:96:1023,96,0	1/1:0,45:46:99:1073,99,0	1/1:0,38:38:96:1029,96,0
20	950189	rs316366084	20:950189	0/0:21,0:21:30:0,30,270	0/0:24,0:24:60:0,60,537	0/0:16,0:16:42:0,42,388	1/1:0,27:28:69:763,69,0	1/1:0,31:31:72:795,72,0	1/1:0,33:34:81:887,81,0
20	952132	rs312283739	20:952132	1/1:0,25:26:57:516,57,0	1/1:0,35:35:87:758,87,0	1/1:0,31:31:48:412,48,0	0/0:37,1:38:96:0,96,1035	0/0:26,2:28:38:0,38,650	0/0:26,2:28:35:0,35,576
20	961297	rs313183735	20:961297	1/1:0,28:28:60:638,60,0	1/1:0,20:22:48:493,48,0	1/1:0,26:29:69:726,69,0	0/0:28,0:28:81:0,81,776	0/0:35,0:35:93:0,93,876	0/0:36,0:36:84:0,84,797
20	961368	rs312624482	20:961368	0/0:25,0:25:63:0,63,618	0/0:21,0:21:54:0,54,533	0/0:25,0:25:57:0,57,548	1/1:0,30:30:81:861,81,0	1/1:0,28:29:60:668,60,0	1/1:0,34:34:87:920,87,0
20	961921	rs317567245	20:961921	0/0:34,0:35:75:0,75,756	0/0:19,0:19:45:0,45,463	0/0:29,0:30:69:0,69,709	1/1:0,33:33:84:834,84,0	1/1:0,40:40:99:1005,102,0	1/1:0,22:24:60:565,60,0
20	962017	rs315986821	20:962017	0/0:23,0:26:51:0,51,513	0/0:19,0:19:45:0,45,457	0/0:23,0:26:60:0,60,618	1/1:0,34:34:84:781,84,0	1/1:0,23:23:54:527,54,0	1/1:0,21:22:60:613,60,0
20	962101	rs741046809	20:962101	0/0:19,0:20:33:0,33,330	0/0:20,0:22:51:0,51,514	0/0:22,0:22:54:0,54,535	1/1:0,29:30:69:636,69,0	1/1:0,28:28:72:679,72,0	1/1:0,28:31:66:622,66,0
20	962239	rs316636253	20:962239	0/0:26,0:26:57:0,57,508	0/0:25,0:25:51:0,51,472	0/0:33,0:34:72:0,72,668	1/1:0,26:26:63:636,63,0	1/1:0,37:37:90:918,90,0	1/1:0,26:26:66:643,66,0
20	1415922	rs314699200	20:1415922	1/1:0,27:27:63:644,63,0	1/1:0,23:24:66:703,66,0	1/1:0,17:18:42:445,42,0	0/0:37,0:37:99:0,99,1063	0/0:49,0:49:99:0,126,1346	0/0:38,1:39:72:0,72,981
20	1415937	rs317905749	20:1415937	1/1:0,29:30:66:686,66,0	1/1:0,23:24:57:591,57,0	1/1:0,17:19:48:504,48,0	0/0:39,0:39:99:0,105,1144	0/0:46,0:46:99:0,129,1386	0/0:39,0:40:99:0,102,1087
20	1415963	rs740877393	20:1415963	1/1:0,33:34:87:865,87,0	1/1:0,28:28:72:743,72,0	1/1:0,23:23:54:558,54,0	0/0:40,0:40:99:0,108,1159	0/0:40,1:41:99:0,114,1262	0/0:35,1:36:96:0,96,1028
20	1416952	rs16158899	20:1416952	1/1:0,29:29:54:544,54,0	1/1:0,36:36:90:882,90,0	1/1:0,30:32:63:644,63,0	0/0:41,0:41:99:0,117,1236	0/0:37,0:38:93:0,93,1029	0/0:45,0:46:99:0,117,1266
20	1417208	rs316255962	20:1417208	1/1:0,24:26:60:615,60,0	1/1:0,29:30:63:630,63,0	1/1:0,26:26:57:573,57,0	0/0:41,0:41:78:0,78,761	0/0:39,0:40:99:0,105,1061	0/0:34,0:35:84:0,84,819
20	1417221	rs317272709	20:1417221	1/1:0,25:25:57:565,57,0	1/1:0,29:31:42:418,42,0	1/1:1,24:26:42:631,42,0	0/0:38,0:39:90:0,90,970	0/0:41,0:41:99:0,111,1202	0/0:37,0:38:99:0,102,1110
20	1419864	rs16158914	20:1419864	1/1:0,25:28:60:629,60,0	1/1:0,41:43:81:812,81,0	1/1:0,38:39:90:918,90,0	0/0:38,0:39:90:0,90,829	0/0:36,0:36:69:0,69,670	0/0:33,0:33:72:0,72,669
20	1423995	rs16158921	20:1423995	1/1:0,23:23:42:431,42,0	1/1:0,39:39:99:1012,99,0	1/1:0,35:36:75:727,75,0	0/0:40,0:40:99:0,102,1113	0/0:31,0:31:81:0,81,868	0/0:31,0:31:87:0,87,935
20	1858482	rs14268757	20:1858482	1/1:0,35:35:81:861,81,0	1/1:0,24:24:66:704,66,0	1/1:1,48:49:99:1312,126,0	0/0:31,0:31:90:0,90,956	0/0:41,0:41:99:0,108,1127	0/0:46,1:47:99:0,120,1307
20	1861274	rs16159454	20:1861274	1/1:0,26:26:63:636,63,0	1/1:0,28:28:69:680,69,0	1/1:0,34:34:84:871,84,0	0/0:31,0:32:87:0,87,940	0/0:23,0:23:57:0,57,586	0/0:30,0:31:84:0,84,873
20	7219264	rs315714382	20:7219264	1/1:0,29:29:66:679,66,0	1/1:0,39:39:99:1196,114,0	1/1:0,32:32:84:915,84,0	0/0:38,0:38:96:0,96,1031	0/0:44,0:45:99:0,111,1228	0/0:34,0:34:90:0,90,957
20	7219287	rs316574752	20:7219287	1/1:0,31:31:69:733,69,0	1/1:0,41:41:99:1237,120,0	1/1:0,35:36:87:908,87,0	0/0:36,0:36:90:0,90,856	0/0:47,0:47:99:0,108,1095	0/0:39,0:39:99:0,111,1114
20	7222561	rs313254407	20:7222561	0/0:36,3:39:87:0,87,920	0/0:31,0:31:78:0,78,822	0/0:27,2:29:38:0,38,605	1/1:0,44:44:99:1168,111,0	1/1:0,41:41:99:1199,111,0	1/1:0,42:42:99:1310,120,0
20	7222565	rs314196401	20:7222565	0/0:39,0:39:99:0,108,1128	0/0:32,0:32:90:0,90,915	0/0:29,0:29:72:0,72,731	1/1:0,41:41:99:1116,108,0	1/1:0,43:43:99:1116,105,0	1/1:0,44:44:99:1295,117,0
20	10585462	rs15177511	20:10585462	0/0:28,2:30:51:0,51,743	0/0:20,0:20:48:0,48,499	0/0:23,0:24:63:0,63,652	1/1:0,31:31:72:714,72,0	1/1:0,28:28:75:777,75,0	1/1:0,21:21:57:571,57,0
20	10585497	rs15177513	20:10585497	0/0:25,0:26:63:0,63,642	0/0:24,0:24:66:0,66,652	0/0:20,0:20:54:0,54,546	1/1:0,33:33:81:820,81,0	1/1:0,30:30:84:858,84,0	1/1:1,20:21:36:546,36,0
20	10585501	rs15177514	20:10585501	0/0:26,0:26:54:0,54,546	0/0:25,0:25:60:0,60,602	0/0:20,0:20:54:0,54,543	1/1:0,31:33:87:886,87,0	1/1:0,28:28:66:696,66,0	1/1:0,22:22:60:618,60,0
20	10716603	rs737309149	20:10716603	1/1:0,19:20:45:466,45,0	1/1:0,25:25:57:528,57,0	1/1:0,19:19:36:367,36,0	0/0:23,0:23:54:0,54,572	0/0:26,0:26:72:0,72,782	0/0:33,0:33:72:0,72,788
20	10716604	rs313962820	20:10716604	1/1:0,18:19:39:399,39,0	1/1:0,24:25:54:501,54,0	1/1:0,18:19:45:450,45,0	0/0:22,0:23:54:0,54,607	0/0:24,0:26:63:0,63,710	0/0:33,0:33:84:0,84,912
20	10716618	rs317239444	20:10716618	1/1:0,21:22:54:574,54,0	1/1:0,25:26:51:496,51,0	1/1:0,21:21:45:473,45,0	0/0:23,0:23:54:0,54,522	0/0:30,0:30:75:0,75,690	0/0:36,0:36:87:0,87,809
20	10737139	rs314850214	20:10737139	1/1:0,28:28:60:615,60,0	1/1:0,36:36:87:890,87,0	1/1:0,36:36:99:1023,99,0	0/0:39,0:39:99:0,99,930	0/0:36,0:37:87:0,87,854	0/0:39,0:39:99:0,108,1059
20	10737148	rs315200431	20:10737148	1/1:0,27:27:57:515,57,0	1/1:0,34:34:72:653,72,0	1/1:0,37:37:72:626,72,0	0/0:40,2:42:99:0,102,1120	0/0:38,0:38:93:0,93,1017	0/0:42,0:42:99:0,105,1149
20	10758546	rs731545589	20:10758546	1/1:0,42:43:99:942,102,0	1/1:0,32:32:66:615,66,0	1/1:0,43:44:96:922,96,0	0/0:34,0:35:93:0,93,968	0/0:48,0:50:99:0,129,1354	0/0:33,0:35:81:0,81,862
20	10758695	rs313768791	20:10758695	1/1:0,35:37:78:762,78,0	1/1:0,16:16:33:326,33,0	1/1:0,21:22:45:436,45,0	0/0:34,0:34:96:0,96,1003	0/0:27,0:27:75:0,75,804	0/0:34,0:34:99:0,102,1087
20	11220573	rs16172961	20:11220573	1/1:0,66:67:99:1226,135,0	1/1:1,79:81:99:1710,180,0	1/1:0,58:59:99:1190,129,0	0/0:38,0:38:99:0,102,1040	0/0:41,0:41:99:0,111,1215	0/0:34,0:34:90:0,90,955
20	11221336	rs14278808	20:11221336	0/0:77,0:77:99:0,192,1989	0/0:85,1:86:99:0,204,1986	0/0:76,1:77:99:0,189,1990	1/1:0,54:54:99:1598,150,0	1/1:0,35:35:96:1040,96,0	1/1:1,54:56:99:1621,150,0
20	11221551	rs14278813	20:11221551	0/0:82,1:83:99:0,216,2289	0/0:70,1:71:99:0,171,1823	0/0:72,0:74:99:0,180,1860	1/1:0,48:48:99:1486,135,0	1/1:1,36:37:96:1051,96,0	1/1:0,45:46:99:1360,123,0
20	11222140	rs10730581	20:11222140	1/1:0,77:78:99:1923,192,0	1/1:0,56:57:99:1455,141,0	1/1:0,58:58:99:1484,150,0	0/0:46,0:47:99:0,123,1307	0/0:44,0:44:99:0,108,1138	0/0:42,0:42:99:0,108,1168
20	11233373	rs16172981	20:11233373	1/1:0,58:58:99:1443,141,0	1/1:1,56:57:99:1347,111,0	1/1:1,53:54:99:1365,129,0	0/0:36,0:36:93:0,93,1018	0/0:44,1:45:99:0,123,1330	0/0:29,0:29:75:0,75,798
20	11233849	rs737273071	20:11233849	1/1:0,50:51:99:1260,129,0	1/1:1,69:70:99:1652,165,0	1/1:0,74:74:99:1866,180,0	0/0:31,0:31:81:0,81,902	0/0:42,0:43:99:0,117,1245	0/0:29,0:29:66:0,66,689
20	11234218	rs16172984	20:11234218	1/1:0,54:57:99:1318,132,0	1/1:0,54:56:99:1368,132,0	1/1:0,61:63:99:1510,150,0	0/0:28,0:29:78:0,78,750	0/0:30,0:30:78:0,78,763	0/0:37,0:38:87:0,87,862
20	11234374	rs16172986	20:11234374	1/1:0,55:56:99:1319,126,0	1/1:0,54:55:99:1497,144,0	1/1:0,57:59:99:1558,150,0	0/0:34,0:34:87:0,87,913	0/0:42,0:42:99:0,117,1227	0/0:44,0:44:99:0,114,1214
20	11240142	rs737787942	20:11240142	0/0:34,0:34:93:0,93,978	0/0:35,0:36:75:0,75,756	0/0:37,0:38:87:0,87,891	1/1:0,43:43:99:1117,108,0	1/1:0,36:36:93:1024,93,0	1/1:0,25:26:54:594,54,0
20	11240721	.	20:11240721	1/1:0,24:24:57:602,57,0	1/1:0,21:22:51:532,51,0	1/1:0,31:31:84:868,84,0	0/0:41,0:41:99:0,105,1014	0/0:41,0:41:99:0,111,1091	0/0:45,0:45:99:0,102,987
20	13340667	rs738059540	20:13340667	1/1:0,37:40:93:946,93,0	1/1:0,33:34:78:807,78,0	1/1:0,39:39:81:844,81,0	0/0:35,0:36:90:0,90,986	0/0:46,0:46:99:0,126,1353	0/0:37,0:37:99:0,102,1082
20	13344238	rs736585716	20:13344238	0/0:33,0:33:93:0,93,1000	0/0:31,0:31:75:0,75,790	0/0:29,0:29:78:0,78,818	1/1:0,37:38:96:925,96,0	1/1:0,39:39:96:969,96,0	1/1:0,37:37:99:965,99,0
20	13344763	rs314778381	20:13344763	1/1:0,29:29:81:819,81,0	1/1:0,35:36:78:826,78,0	1/1:0,38:39:84:889,84,0	0/0:35,0:35:84:0,84,840	0/0:30,0:30:84:0,84,838	0/0:30,0:31:75:0,75,730
21	554032	rs315453333	21:554032	1/1:0,33:33:81:820,81,0	1/1:1,33:34:75:780,75,0	1/1:0,26:29:75:776,75,0	0/0:40,0:40:99:0,108,1184	0/0:33,0:34:81:0,81,855	0/0:56,0:57:99:0,129,1400
21	554115	rs317032605	21:554115	1/1:0,47:48:99:1158,117,0	1/1:0,49:49:99:1372,132,0	1/1:0,28:28:66:698,66,0	0/0:46,0:46:96:0,96,900	0/0:33,0:33:72:0,72,719	0/0:42,0:42:99:0,108,1070
21	554378	rs15180261	21:554378	0/0:30,0:30:69:0,69,670	0/0:28,0:29:72:0,72,737	0/0:19,0:19:54:0,54,540	1/1:0,29:29:66:709,66,0	1/1:0,36:36:93:980,93,0	1/1:0,27:30:57:600,57,0
21	554381	rs15180262	21:554381	0/0:29,0:29:75:0,75,769	0/0:28,0:28:66:0,66,723	0/0:19,0:19:51:0,51,513	1/1:0,27:27:78:842,78,0	1/1:0,37:38:99:1029,99,0	1/1:0,29:30:69:742,69,0
21	556072	rs738068256	21:556072	0/0:33,0:33:54:0,54,459	0/0:23,0:23:45:0,45,397	0/0:29,0:31:72:0,72,626	1/1:0,34:34:93:991,93,0	1/1:0,25:25:69:781,69,0	1/1:0,32:32:87:944,87,0
21	556085	rs731779643	21:556085	0/0:30,0:33:63:0,63,550	0/0:26,0:26:51:0,51,470	0/0:31,0:31:75:0,75,695	1/1:0,32:32:87:960,87,0	1/1:0,27:28:78:847,78,0	1/1:0,31:32:75:826,75,0
21	556759	rs316872211	21:556759	0/0:33,0:34:78:0,78,735	0/0:24,0:24:51:0,51,536	0/0:23,0:25:42:0,42,424	1/1:1,40:41:92:1247,92,0	1/1:1,38:39:85:1169,85,0	1/1:0,31:32:84:949,84,0
21	557298	rs10731561	21:557298	0/0:34,0:34:90:0,90,891	0/0:34,0:35:90:0,90,930	0/0:23,0:23:57:0,57,571	1/1:0,37:38:99:1059,99,0	1/1:0,42:42:99:1208,114,0	1/1:0,37:38:81:856,81,0
21	557344	rs10725890	21:557344	0/0:35,0:35:93:0,93,966	0/0:30,0:31:81:0,81,856	0/0:22,0:22:54:0,54,556	1/1:0,29:30:72:792,72,0	1/1:0,39:39:99:1171,108,0	1/1:0,25:26:57:616,57,0
21	558497	rs316954748	21:558497	0/0:26,0:27:45:0,45,416	0/0:17,0:18:27:0,27,259	0/0:32,0:32:57:0,57,506	1/1:0,34:34:81:914,81,0	1/1:0,30:30:75:812,75,0	1/1:0,26:27:66:704,66,0
21	941649	rs16177246	21:941649	1/1:0,25:25:57:621,57,0	1/1:0,28:28:63:660,63,0	1/1:0,24:24:60:595,60,0	0/0:29,0:29:75:0,75,772	0/0:34,0:34:93:0,93,952	0/0:36,0:36:87:0,87,905
21	941679	rs16177247	21:941679	1/1:0,30:30:78:839,78,0	1/1:1,23:25:60:606,60,0	1/1:0,20:20:48:478,48,0	0/0:25,0:25:72:0,72,788	0/0:26,0:26:72:0,72,777	0/0:40,0:40:99:0,111,1158
21	1838826	rs313396877	21:1838826	0/0:25,1:26:60:0,60,618	0/0:21,0:24:42:0,42,438	0/0:29,0:31:54:0,54,568	1/1:0,34:35:69:747,69,0	1/1:0,27:28:78:877,78,0	1/1:0,40:40:99:1196,108,0
21	1838846	rs740091088	21:1838846	0/0:24,1:26:51:0,51,500	0/0:20,0:20:27:0,27,265	0/0:29,0:30:63:0,63,606	1/1:0,36:36:75:683,75,0	1/1:0,24:24:42:409,42,0	1/1:1,31:32:78:726,78,0
21	2709631	rs735392681	21:2709631	1/1:0,30:30:63:590,63,0	1/1:0,24:25:57:509,57,0	1/1:0,20:21:39:363,39,0	0/0:37,0:38:99:0,108,1145	0/0:37,0:37:99:0,99,1067	0/0:34,0:34:99:0,99,1067
21	2709765	rs735300621	21:2709765	1/1:1,22:23:42:417,42,0	1/1:0,26:26:57:542,57,0	1/1:2,26:29:63:595,63,0	0/0:21,1:23:33:0,33,528	0/0:29,0:29:75:0,75,773	0/0:45,1:46:93:0,93,973
21	2709787	rs735749909	21:2709787	1/1:0,23:24:51:498,51,0	1/1:0,19:19:27:245,27,0	1/1:0,31:31:45:404,45,0	0/0:21,0:21:51:0,51,541	0/0:28,0:28:78:0,78,861	0/0:46,0:46:99:0,126,1364
21	2710054	rs740909809	21:2710054	1/1:0,21:22:51:500,51,0	1/1:0,24:26:48:478,48,0	1/1:0,15:15:30:297,30,0	0/0:26,0:26:66:0,66,698	0/0:20,0:21:60:0,60,625	0/0:29,0:29:78:0,78,820
21	2710549	rs731171831	21:2710549	1/1:0,19:21:36:380,36,0	1/1:0,20:20:36:354,36,0	1/1:0,24:26:54:570,54,0	0/0:17,0:17:48:0,48,433	0/0:25,0:25:60:0,60,583	0/0:26,0:26:66:0,66,659
21	2710669	rs735902882	21:2710669	1/1:0,21:21:54:577,54,0	1/1:0,17:17:39:402,39,0	1/1:1,12:13:33:328,33,0	0/0:23,0:23:60:0,60,627	0/0:22,0:22:60:0,60,632	0/0:16,0:16:42:0,42,457
21	2710701	rs736442164	21:2710701	1/1:0,19:19:48:440,48,0	1/1:1,17:18:36:320,36,0	1/1:0,13:13:21:190,21,0	0/0:20,0:20:54:0,54,583	0/0:25,0:25:60:0,60,661	0/0:19,0:19:54:0,54,588
21	3427218	rs312954629	21:3427218	1/1:0,28:29:57:547,57,0	1/1:0,19:19:45:414,45,0	1/1:0,27:29:72:665,72,0	0/0:40,0:40:96:0,96,1065	0/0:44,0:44:99:0,123,1308	0/0:27,0:28:69:0,69,754
21	3428764	rs318069470	21:3428764	0/0:23,0:23:39:0,39,341	0/0:21,0:22:42:0,42,387	0/0:23,0:23:45:0,45,430	1/1:0,24:24:63:685,63,0	1/1:0,33:33:78:839,78,0	1/1:0,43:43:99:1222,114,0
21	4850269	rs13801128	21:4850269	0/0:30,0:31:84:0,84,879	0/0:20,0:20:48:0,48,509	0/0:27,0:27:69:0,69,696	1/1:0,28:28:84:866,84,0	1/1:0,31:33:78:821,78,0	1/1:0,44:44:99:1184,114,0
21	4851014	rs315093621	21:4851014	0/0:12,0:12:27:0,27,241	0/0:13,0:13:30:0,30,271	0/0:19,0:19:36:0,36,320	1/1:0,18:18:42:448,42,0	1/1:1,21:22:48:525,48,0	1/1:0,17:17:45:494,45,0
21	4909784	rs312395449	21:4909784	1/1:0,20:21:51:530,51,0	1/1:0,24:24:57:579,57,0	1/1:0,24:24:54:553,54,0	0/0:30,0:30:84:0,84,875	0/0:42,0:42:99:0,111,1130	0/0:27,0:27:72:0,72,744
21	4909785	rs316996832	21:4909785	1/1:0,22:22:54:563,54,0	1/1:0,21:24:39:413,39,0	1/1:0,24:24:60:643,60,0	0/0:29,0:30:72:0,72,705	0/0:42,0:42:96:0,96,906	0/0:27,0:27:60:0,60,559
21	4910021	rs16074542	21:4910021	1/1:0,33:34:84:852,84,0	1/1:0,14:14:33:342,33,0	1/1:0,31:31:72:729,72,0	0/0:27,0:28:75:0,75,784	0/0:27,0:27:66:0,66,728	0/0:37,0:37:96:0,96,1039
21	4910074	rs312956692	21:4910074	0/0:25,0:26:63:0,63,646	0/0:19,0:19:54:0,54,553	0/0:31,0:31:69:0,69,744	1/1:0,37:38:99:1120,105,0	1/1:0,28:28:69:759,69,0	1/1:0,30:30:84:915,84,0
21	4910092	rs312437616	21:4910092	0/0:26,0:26:60:0,60,571	0/0:18,1:19:36:0,36,355	0/0:31,2:33:55:0,55,724	1/1:0,41:41:99:1000,102,0	1/1:0,31:32:84:840,84,0	1/1:0,24:24:63:614,63,0
21	4911101	rs315150544	21:4911101	1/1:0,19:20:45:452,45,0	1/1:0,25:27:51:549,51,0	1/1:0,27:27:57:610,57,0	0/0:35,0:35:84:0,84,795	0/0:28,0:29:57:0,57,537	0/0:28,0:30:57:0,57,549
21	5397072	rs15184213	21:5397072	0/0:25,0:27:63:0,63,659	0/0:27,0:27:75:0,75,806	0/0:27,0:27:69:0,69,698	1/1:0,34:34:87:893,87,0	1/1:0,42:43:99:1092,105,0	1/1:0,42:42:99:1083,108,0
21	5397162	rs735394408	21:5397162	1/1:0,39:39:99:1083,102,0	1/1:0,24:24:54:563,54,0	1/1:0,33:35:78:818,78,0	0/0:36,0:36:93:0,93,867	0/0:39,0:40:87:0,87,837	0/0:32,0:32:87:0,87,829
21	5609699	rs313072178	21:5609699	0/0:35,0:36:81:0,81,832	0/0:21,0:21:51:0,51,510	0/0:24,0:24:54:0,54,586	1/1:0,28:28:72:682,72,0	1/1:0,38:38:99:1003,102,0	1/1:0,37:37:84:828,84,0
21	5613222	rs317157749	21:5613222	0/0:29,0:29:69:0,69,637	0/0:27,0:27:51:0,51,466	0/0:33,0:33:84:0,84,786	1/1:0,43:43:99:1341,123,0	1/1:0,37:38:99:1093,99,0	1/1:0,48:49:99:1270,114,0
21	5613306	rs13630131	21:5613306	0/0:29,0:29:78:0,78,813	0/0:26,0:27:60:0,60,621	0/0:35,0:38:93:0,93,985	1/1:0,30:31:69:730,69,0	1/1:0,35:35:96:1024,96,0	1/1:0,39:39:99:1192,108,0
21	5613345	rs13630132	21:5613345	0/0:32,0:33:72:0,72,744	0/0:32,0:32:78:0,78,836	0/0:33,0:34:87:0,87,895	1/1:0,37:37:99:990,99,0	1/1:0,36:37:99:995,99,0	1/1:0,34:34:81:802,81,0
21	5613494	rs14285472	21:5613494	0/0:17,0:18:42:0,42,457	0/0:29,0:29:75:0,75,791	0/0:27,0:27:72:0,72,709	1/1:0,39:39:99:1082,99,0	1/1:0,30:30:87:971,87,0	1/1:0,36:36:87:944,87,0
21	5613515	rs14285473	21:5613515	0/0:20,1:22:51:0,51,535	0/0:21,1:23:54:0,54,559	0/0:26,0:26:63:0,63,621	1/1:0,41:41:96:1055,96,0	1/1:0,30:31:87:951,87,0	1/1:0,39:39:99:1112,105,0
21	5613587	rs14285474	21:5613587	0/0:27,0:27:69:0,69,694	0/0:29,0:30:72:0,72,704	0/0:31,0:33:69:0,69,712	1/1:0,51:51:99:1388,129,0	1/1:0,33:33:90:973,90,0	1/1:0,34:34:81:898,81,0
21	5614048	rs317412572	21:5614048	0/0:32,0:32:90:0,90,961	0/0:38,0:38:99:0,99,1029	0/0:34,0:34:84:0,84,885	1/1:0,27:27:66:639,66,0	1/1:0,43:44:99:1050,105,0	1/1:0,37:37:75:731,75,0
21	6360405	rs312976231	21:6360405	1/1:1,35:36:84:834,84,0	1/1:0,25:25:54:501,54,0	1/1:0,30:30:60:593,60,0	0/0:37,0:37:99:0,99,1066	0/0:40,0:41:99:0,99,1080	0/0:29,1:30:32:0,32,547
21	6360538	rs737666569	21:6360538	1/1:0,20:20:36:361,36,0	1/1:0,19:19:39:364,39,0	1/1:0,21:21:27:252,27,0	0/0:14,0:14:33:0,33,361	0/0:37,0:37:99:0,99,1100	0/0:15,0:15:42:0,42,452
21	6360541	rs739575448	21:6360541	1/1:1,15:18:33:325,33,0	1/1:0,18:19:36:351,36,0	1/1:0,18:19:30:300,30,0	0/0:15,0:15:39:0,39,388	0/0:35,0:36:90:0,90,931	0/0:15,0:16:45:0,45,450
21	6360587	rs16183160	21:6360587	1/1:0,19:20:33:345,33,0	1/1:0,24:24:54:533,54,0	1/1:0,22:24:51:503,51,0	0/0:22,0:22:63:0,63,673	0/0:35,0:35:99:0,99,1076	0/0:23,0:23:63:0,63,657
23	3466671	rs313477269	23:3466671	0/0:24,0:24:51:0,51,498	0/0:21,0:22:51:0,51,490	0/0:13,0:13:33:0,33,327	1/1:0,29:29:75:817,75,0	1/1:0,33:33:90:985,90,0	1/1:0,36:37:96:1025,96,0
23	3468036	rs314722701	23:3468036	0/0:30,0:31:54:0,54,503	0/0:28,0:28:51:0,51,461	0/0:21,0:21:39:0,39,344	1/1:0,30:30:75:834,75,0	1/1:0,35:35:87:931,87,0	1/1:0,42:43:99:1148,105,0
23	3469094	rs738032566	23:3469094	0/0:43,0:44:99:0,120,1247	0/0:26,0:26:66:0,66,679	0/0:23,0:23:63:0,63,660	1/1:0,25:25:66:715,66,0	1/1:0,34:34:90:978,90,0	1/1:0,28:29:66:716,66,0
23	3476039	rs313661082	23:3476039	0/0:35,0:35:87:0,87,904	0/0:20,0:20:42:0,42,413	0/0:25,0:26:57:0,57,586	1/1:0,35:35:87:867,87,0	1/1:0,41:41:96:931,96,0	1/1:0,29:29:72:689,72,0
23	3476467	rs317789778	23:3476467	0/0:52,0:52:99:0,138,1419	0/0:30,0:30:78:0,78,868	0/0:27,0:28:72:0,72,759	1/1:0,35:35:90:987,90,0	1/1:0,51:52:99:1432,129,0	1/1:0,41:42:99:1209,111,0
23	3476845	rs29005403	23:3476845	0/0:43,0:44:99:0,117,1158	0/0:43,0:43:96:0,96,920	0/0:32,0:32:78:0,78,749	1/1:0,37:39:87:930,87,0	1/1:0,37:40:96:1012,96,0	1/1:0,42:42:99:1098,105,0
23	3477229	rs15201972	23:3477229	0/0:34,0:36:84:0,84,859	0/0:29,0:30:66:0,66,661	0/0:33,0:35:87:0,87,879	1/1:0,42:42:99:1211,117,0	1/1:0,42:43:99:1268,120,0	1/1:0,43:43:99:1233,114,0
23	4009492	rs313327042	23:4009492	1/1:0,23:23:45:417,45,0	1/1:0,20:20:33:316,33,0	1/1:1,24:25:30:275,30,0	0/0:18,0:18:42:0,42,426	0/0:25,0:25:60:0,60,637	0/0:17,0:17:39:0,39,408
23	4017375	rs739512371	23:4017375	1/1:0,30:31:78:772,78,0	1/1:0,25:25:57:571,57,0	1/1:0,30:30:66:667,66,0	0/0:30,1:31:72:0,72,781	0/0:30,0:30:69:0,69,747	0/0:33,0:33:75:0,75,811
23	4017388	rs737840918	23:4017388	1/1:0,35:36:60:539,60,0	1/1:0,24:24:45:409,45,0	1/1:0,30:30:75:708,75,0	0/0:34,0:34:90:0,90,989	0/0:29,0:29:81:0,81,866	0/0:30,0:31:72:0,72,803
23	4017544	rs317580287	23:4017544	1/1:0,25:27:66:644,66,0	1/1:0,30:30:75:732,75,0	1/1:0,37:37:84:807,84,0	0/0:47,0:48:99:0,129,1393	0/0:34,0:35:90:0,90,976	0/0:33,0:33:90:0,90,969
23	4017625	rs317696909	23:4017625	1/1:1,30:32:35:583,35,0	1/1:0,30:30:69:705,69,0	1/1:1,30:31:66:691,66,0	0/0:43,1:44:99:0,114,1230	0/0:39,1:40:87:0,87,944	0/0:39,0:39:99:0,108,1170
23	4018987	rs10728595	23:4018987	1/1:0,23:23:54:495,54,0	1/1:0,30:30:66:607,66,0	1/1:0,25:25:60:539,60,0	0/0:42,0:43:87:0,87,959	0/0:38,0:38:99:0,102,1147	0/0:33,1:35:87:0,87,960
23	4032783	rs735616631	23:4032783	0/0:12,0:13:24:0,24,211	0/0:16,0:16:33:0,33,317	0/0:27,0:27:57:0,57,544	1/1:0,15:15:42:470,42,0	1/1:0,23:23:54:571,54,0	1/1:0,19:19:42:447,42,0
23	4032795	rs737091869	23:4032795	0/0:13,0:14:27:0,27,278	0/0:16,0:16:33:0,33,306	0/0:24,0:24:42:0,42,400	1/1:0,16:16:39:411,39,0	1/1:0,23:24:48:520,48,0	1/1:0,19:20:36:372,36,0
23	4033780	rs317162724	23:4033780	1/1:0,29:30:54:508,54,0	1/1:0,24:24:63:590,63,0	1/1:0,38:38:90:849,90,0	0/0:38,0:38:99:0,102,1081	0/0:47,0:47:99:0,117,1241	0/0:30,0:31:78:0,78,814
23	4033788	rs312431159	23:4033788	1/1:0,27:28:54:557,54,0	1/1:0,23:23:48:478,48,0	1/1:3,36:39:72:749,72,0	0/0:36,0:36:96:0,96,918	0/0:44,0:44:99:0,117,1091	0/0:30,0:30:69:0,69,665
23	4037564	rs732500851	23:4037564	1/1:0,22:22:39:399,39,0	1/1:0,19:20:42:422,42,0	1/1:0,19:20:36:353,36,0	0/0:21,0:23:51:0,51,503	0/0:15,0:15:42:0,42,394	0/0:18,0:21:51:0,51,473
23	4054985	rs16190550	23:4054985	1/1:1,35:36:84:863,84,0	1/1:0,35:36:84:839,84,0	1/1:0,22:22:48:494,48,0	0/0:44,0:44:99:0,111,1138	0/0:44,0:44:99:0,126,1298	0/0:36,1:37:96:0,96,997
23	4054989	rs16190551	23:4054989	1/1:0,35:35:84:853,84,0	1/1:1,35:36:84:874,84,0	1/1:0,21:22:48:513,48,0	0/0:42,0:42:99:0,108,1156	0/0:45,0:45:99:0,120,1309	0/0:36,0:36:99:0,102,1093
23	4055167	rs16190553	23:4055167	1/1:1,36:38:81:807,81,0	1/1:0,35:36:81:846,81,0	1/1:0,25:25:57:572,57,0	0/0:36,0:36:90:0,90,981	0/0:43,0:43:99:0,111,1189	0/0:24,0:26:60:0,60,639
23	4055245	rs316552468	23:4055245	1/1:0,29:29:66:659,66,0	1/1:0,28:28:63:639,63,0	1/1:0,24:24:54:566,54,0	0/0:41,0:41:99:0,114,1200	0/0:57,1:58:99:0,147,1521	0/0:22,0:22:57:0,57,616
23	4055785	rs740148583	23:4055785	0/0:32,0:32:87:0,87,898	0/0:33,0:34:81:0,81,879	0/0:31,0:32:78:0,78,810	1/1:0,37:37:93:875,93,0	1/1:0,35:36:78:750,78,0	1/1:0,26:26:57:541,57,0
23	4055998	rs314854232	23:4055998	1/1:1,31:32:72:728,72,0	1/1:2,32:34:78:798,78,0	1/1:0,24:24:60:607,60,0	0/0:33,0:33:84:0,84,887	0/0:46,0:46:99:0,123,1343	0/0:26,0:27:60:0,60,663
23	4056022	rs317081843	23:4056022	0/0:32,0:33:81:0,81,740	0/0:33,0:34:63:0,63,575	0/0:24,0:24:54:0,54,515	1/1:0,29:29:78:816,78,0	1/1:0,48:49:99:1294,120,0	1/1:0,34:34:84:868,84,0
23	4056158	rs29005096	23:4056158	0/0:32,0:32:84:0,84,871	0/0:24,0:25:63:0,63,633	0/0:34,0:34:78:0,78,839	1/1:0,30:30:87:880,87,0	1/1:0,38:39:93:932,93,0	1/1:0,39:40:99:1011,102,0
24	345627	rs317863861	24:345627	0/0:18,0:19:42:0,42,385	0/0:26,0:27:36:0,36,354	0/0:26,0:26:57:0,57,522	1/1:0,27:27:72:781,72,0	1/1:0,27:27:66:704,66,0	1/1:0,39:39:87:925,87,0
24	346081	rs312432693	24:346081	0/0:22,0:22:39:0,39,371	0/0:22,0:22:48:0,48,428	0/0:32,0:34:66:0,66,602	1/1:0,29:31:69:732,69,0	1/1:0,20:21:48:495,48,0	1/1:0,35:35:81:850,81,0
24	5465138	rs318152346	24:5465138	0/0:28,0:28:75:0,75,812	0/0:38,0:39:99:0,105,1132	0/0:32,1:33:78:0,78,828	1/1:0,31:31:81:819,81,0	1/1:0,46:46:99:1204,123,0	1/1:0,39:39:99:1013,105,0
24	5465829	rs316546348	24:5465829	0/0:33,0:33:84:0,84,838	0/0:33,0:33:78:0,78,810	0/0:27,0:27:66:0,66,650	1/1:1,46:47:99:1300,123,0	1/1:1,41:42:78:1048,78,0	1/1:0,33:33:90:956,90,0
24	5465871	rs313476458	24:5465871	0/0:32,0:32:84:0,84,899	0/0:34,0:34:78:0,78,822	0/0:32,0:32:81:0,81,856	1/1:0,41:42:99:1017,105,0	1/1:0,44:44:99:1063,102,0	1/1:0,32:33:81:820,81,0
24	5466607	rs13724935	24:5466607	0/0:34,0:35:90:0,90,933	0/0:36,0:36:72:0,72,706	0/0:32,0:33:81:0,81,822	1/1:0,30:30:75:797,75,0	1/1:0,56:56:99:1535,141,0	1/1:0,43:44:99:1077,102,0
24	5467034	rs314991678	24:5467034	0/0:26,0:26:57:0,57,524	0/0:23,0:23:51:0,51,538	0/0:28,0:28:63:0,63,605	1/1:0,36:36:99:1060,99,0	1/1:0,31:32:78:859,78,0	1/1:0,51:54:99:1510,141,0
24	5470503	rs15225233	24:5470503	0/0:29,0:31:72:0,72,738	0/0:33,0:36:75:0,75,773	0/0:28,0:28:45:0,45,435	1/1:0,28:28:63:639,63,0	1/1:0,46:46:99:1195,117,0	1/1:0,27:27:72:733,72,0
25	1484021	rs314681078	25:1484021	1/1:0,34:34:90:902,90,0	1/1:0,23:23:69:714,69,0	1/1:0,25:25:63:635,63,0	0/0:38,0:38:99:0,105,1128	0/0:32,0:32:78:0,78,819	0/0:33,0:34:81:0,81,893
25	1484044	rs313775984	25:1484044	0/0:33,0:33:84:0,84,893	0/0:22,0:22:57:0,57,612	0/0:24,0:24:60:0,60,617	1/1:0,43:43:99:1233,120,0	1/1:0,39:41:99:1094,102,0	1/1:0,39:39:96:1016,96,0
26	809345	rs316973922	26:809345	0/0:35,0:35:93:0,93,932	0/0:35,0:35:90:0,90,970	0/0:37,0:37:81:0,81,835	1/1:0,39:39:99:1188,111,0	1/1:0,31:31:87:940,87,0	1/1:0,49:50:99:1483,135,0
26	809714	rs313477701	26:809714	0/0:17,0:19:45:0,45,437	0/0:25,0:25:48:0,48,485	0/0:23,0:25:57:0,57,572	1/1:1,37:38:99:1136,105,0	1/1:0,44:45:99:1242,114,0	1/1:0,36:37:90:981,90,0
26	810022	rs739746443	26:810022	0/0:29,0:30:54:0,54,511	0/0:27,0:28:57:0,57,511	0/0:36,0:37:87:0,87,765	1/1:0,28:28:78:837,78,0	1/1:0,25:25:66:733,66,0	1/1:0,39:39:99:1160,105,0
26	810326	rs315579824	26:810326	0/0:21,0:21:48:0,48,480	0/0:27,0:27:75:0,75,779	0/0:25,0:26:54:0,54,547	1/1:0,21:21:51:550,51,0	1/1:0,32:32:90:947,90,0	1/1:0,26:27:72:783,72,0
26	2138985	rs314235301	26:2138985	0/0:22,0:23:48:0,48,454	0/0:29,0:29:66:0,66,616	0/0:26,0:26:51:0,51,459	1/1:0,30:30:81:878,81,0	1/1:0,37:37:99:1103,102,0	1/1:0,28:29:78:873,78,0
26	2141211	rs14298521	26:2141211	0/0:34,0:35:93:0,93,968	0/0:21,0:21:57:0,57,600	0/0:27,0:28:63:0,63,675	1/1:0,35:35:93:906,93,0	1/1:0,33:34:87:838,87,0	1/1:0,41:41:99:986,99,0
26	2145125	rs317823637	26:2145125	0/0:33,1:34:75:0,75,755	0/0:25,0:25:57:0,57,587	0/0:20,0:22:48:0,48,443	1/1:0,29:29:78:848,78,0	1/1:0,29:29:81:864,81,0	1/1:0,29:29:78:853,78,0
26	2226611	rs314585065	26:2226611	1/1:0,41:41:99:1139,111,0	1/1:0,33:33:90:961,90,0	1/1:1,28:30:69:695,69,0	0/0:35,1:36:82:0,82,1058	0/0:38,0:38:99:0,105,1128	0/0:28,0:28:78:0,78,868
26	2227016	rs315492890	26:2227016	0/0:34,0:34:66:0,66,583	0/0:28,0:28:66:0,66,594	0/0:23,1:25:48:0,48,429	1/1:1,31:32:81:842,81,0	1/1:1,33:34:90:979,90,0	1/1:0,27:27:75:806,75,0
26	2227113	rs312627026	26:2227113	0/0:48,0:48:99:0,114,1179	0/0:39,0:39:99:0,99,1023	0/0:41,0:41:99:0,99,1032	1/1:1,43:44:99:1229,111,0	1/1:1,35:36:96:1036,96,0	1/1:1,27:28:75:817,75,0
26	2227117	rs317486793	26:2227117	0/0:46,0:46:96:0,96,895	0/0:39,0:40:87:0,87,822	0/0:44,0:44:90:0,90,842	1/1:0,43:43:99:1192,111,0	1/1:0,36:36:99:1053,99,0	1/1:0,29:29:72:747,72,0
26	2227564	rs315834631	26:2227564	0/0:26,0:28:69:0,69,692	0/0:39,0:40:84:0,84,876	0/0:49,0:49:99:0,126,1248	1/1:0,36:37:99:1102,105,0	1/1:0,39:41:99:1182,114,0	1/1:0,36:36:90:932,90,0
26	2227744	rs15230223	26:2227744	0/0:30,1:31:78:0,78,803	0/0:41,0:42:99:0,102,1050	0/0:29,0:30:69:0,69,671	1/1:0,24:25:57:609,57,0	1/1:0,51:51:99:1360,129,0	1/1:1,32:33:90:952,90,0
26	2244201	rs315275980	26:2244201	0/0:30,0:32:69:0,69,717	0/0:27,0:28:69:0,69,695	0/0:23,0:25:63:0,63,632	1/1:0,29:30:72:710,72,0	1/1:0,33:33:84:809,84,0	1/1:0,22:22:54:523,54,0
26	2381965	rs16201471	26:2381965	1/1:1,27:31:32:487,32,0	1/1:0,23:23:51:479,51,0	1/1:0,32:32:66:620,66,0	0/0:29,0:30:81:0,81,878	0/0:38,0:38:99:0,105,1159	0/0:26,0:26:69:0,69,747
26	2409563	rs316161971	26:2409563	1/1:0,19:19:51:475,51,0	1/1:0,24:24:48:426,48,0	1/1:0,15:15:33:340,33,0	0/0:22,1:26:36:0,36,382	0/0:26,0:28:51:0,51,559	0/0:26,0:27:48:0,48,517
26	2571914	rs15231386	26:2571914	0/0:21,0:21:57:0,57,551	0/0:26,0:26:69:0,69,709	0/0:13,0:13:33:0,33,343	1/1:0,25:25:72:757,72,0	1/1:0,32:32:84:915,84,0	1/1:0,41:41:99:1181,108,0
26	2571922	rs15231389	26:2571922	0/0:20,0:21:48:0,48,470	0/0:23,0:25:57:0,57,597	0/0:15,0:15:39:0,39,392	1/1:0,27:27:60:570,60,0	1/1:0,31:31:87:847,87,0	1/1:0,42:42:99:977,102,0
26	2572112	rs15231392	26:2572112	0/0:26,0:26:51:0,51,510	0/0:20,0:20:42:0,42,413	0/0:19,1:21:45:0,45,474	1/1:0,26:26:60:612,60,0	1/1:0,37:37:99:990,99,0	1/1:0,33:34:87:920,87,0
27	2818959	rs10731269	27:2818959	1/1:0,35:36:87:900,87,0	1/1:0,19:20:54:569,54,0	1/1:1,24:25:30:489,30,0	0/0:36,0:36:99:0,102,1141	0/0:38,0:38:99:0,102,1157	0/0:36,0:36:99:0,99,1023
27	2819021	rs318138851	27:2819021	1/1:0,31:31:75:729,75,0	1/1:0,35:36:81:807,81,0	1/1:0,28:29:63:631,63,0	0/0:36,0:38:93:0,93,999	0/0:30,0:30:72:0,72,778	0/0:27,0:29:66:0,66,700
27	2819844	rs16206632	27:2819844	1/1:0,29:29:72:738,72,0	1/1:0,24:24:72:740,72,0	1/1:0,25:26:66:701,66,0	0/0:33,0:34:69:0,69,685	0/0:31,0:31:81:0,81,788	0/0:32,0:32:60:0,60,581
27	5088836	rs10726906	27:5088836	0/0:34,0:34:93:0,93,905	0/0:38,0:38:99:0,99,1020	0/0:28,0:28:72:0,72,735	1/1:1,33:34:78:856,78,0	1/1:0,36:36:99:1107,99,0	1/1:0,33:33:84:935,84,0
27	5094423	.	27:5094423	0/0:38,0:40:78:0,78,791	0/0:32,1:33:81:0,81,850	0/0:35,0:36:87:0,87,890	1/1:0,32:32:72:693,72,0	1/1:0,34:34:84:853,84,0	1/1:0,48:48:99:1299,129,0
27	5112141	rs318100040	27:5112141	0/0:40,1:41:85:0,85,1094	0/0:27,0:27:66:0,66,637	0/0:35,3:38:46:0,46,724	1/1:1,33:34:90:1014,90,0	1/1:0,39:39:99:1169,105,0	1/1:0,40:40:99:1259,114,0
27	5114537	rs735422660	27:5114537	0/0:27,0:29:57:0,57,586	0/0:23,0:25:51:0,51,517	0/0:14,1:16:27:0,27,282	1/1:0,36:38:84:844,84,0	1/1:0,39:39:99:1050,99,0	1/1:0,34:34:93:939,93,0
27	5160875	rs312939500	27:5160875	0/0:32,0:32:84:0,84,842	0/0:22,1:23:51:0,51,530	0/0:44,1:45:96:0,96,968	1/1:0,31:31:90:1001,90,0	1/1:0,31:31:81:847,81,0	1/1:0,36:36:99:1173,108,0
27	5161307	rs314620339	27:5161307	0/0:27,0:27:60:0,60,564	0/0:28,0:28:69:0,69,638	0/0:34,0:34:78:0,78,705	1/1:0,37:37:99:1117,105,0	1/1:0,37:37:99:1166,108,0	1/1:0,43:43:99:1286,120,0
27	5162681	rs739169384	27:5162681	0/0:35,0:35:99:0,102,1116	0/0:25,0:26:63:0,63,658	0/0:32,0:32:81:0,81,847	1/1:0,43:43:99:1153,111,0	1/1:0,38:39:99:1082,105,0	1/1:0,36:37:96:967,96,0
28	1090744	rs741127407	28:1090744	1/1:0,33:35:69:720,69,0	1/1:0,23:24:39:414,39,0	1/1:0,24:27:60:613,60,0	0/0:41,0:41:99:0,117,1201	0/0:28,0:28:78:0,78,762	0/0:31,0:31:69:0,69,700
28	1090746	rs732213095	28:1090746	0/0:34,0:36:81:0,81,728	0/0:23,0:23:45:0,45,410	0/0:28,0:28:54:0,54,495	1/1:0,42:42:99:1213,111,0	1/1:0,27:27:81:857,81,0	1/1:0,31:31:75:795,75,0
28	2454519	rs317510193	28:2454519	0/0:37,0:37:69:0,69,630	0/0:24,0:24:60:0,60,554	0/0:23,0:23:60:0,60,579	1/1:0,33:33:93:991,93,0	1/1:0,35:35:99:1111,99,0	1/1:0,30:30:72:785,72,0
28	2463053	rs312488975	28:2463053	0/0:34,0:34:78:0,78,720	0/0:19,1:20:48:0,48,446	0/0:38,0:38:87:0,87,809	1/1:0,32:33:93:993,93,0	1/1:0,38:39:99:1146,108,0	1/1:1,28:31:69:752,69,0
28	2463414	rs312888673	28:2463414	0/0:23,0:23:45:0,45,405	0/0:27,0:27:51:0,51,484	0/0:34,0:34:81:0,81,735	1/1:0,30:30:84:933,84,0	1/1:0,36:36:96:1046,96,0	1/1:0,28:28:75:813,75,0
28	2463416	rs315421996	28:2463416	0/0:23,0:23:60:0,60,614	0/0:26,0:26:57:0,57,612	0/0:33,0:34:90:0,90,889	1/1:0,30:30:78:875,78,0	1/1:0,35:36:99:1101,102,0	1/1:0,28:28:81:845,81,0
28	2467218	rs314080079	28:2467218	0/0:40,0:41:93:0,93,919	0/0:46,0:46:99:0,114,1181	0/0:37,0:38:90:0,90,912	1/1:0,44:44:99:1399,129,0	1/1:0,39:39:99:1186,111,0	1/1:0,36:36:99:1073,102,0
28	2771721	.	28:2771721	0/0:18,0:18:42:0,42,400	0/0:20,0:20:48:0,48,472	0/0:20,0:21:54:0,54,528	1/1:0,20:21:33:338,33,0	1/1:0,27:28:54:567,54,0	1/1:0,19:22:42:444,42,0
28	2788855	rs738303794	28:2788855	0/0:25,0:25:48:0,48,493	0/0:18,0:18:39:0,39,382	0/0:27,0:27:48:0,48,460	1/1:1,16:17:36:360,36,0	1/1:0,31:32:78:854,78,0	1/1:0,35:36:81:861,81,0
28	2854018	rs29004898	28:2854018	0/0:32,0:33:72:0,72,655	0/0:24,0:24:60:0,60,562	0/0:38,0:38:78:0,78,753	1/1:0,33:34:90:971,90,0	1/1:0,36:37:93:1007,93,0	1/1:0,43:43:99:1121,105,0
28	2854793	rs313618373	28:2854793	0/0:34,0:34:81:0,81,835	0/0:31,0:32:81:0,81,843	0/0:23,0:23:57:0,57,587	1/1:0,44:45:99:1041,108,0	1/1:0,33:36:75:748,75,0	1/1:0,23:24:51:489,51,0
28	3811157	rs736611482	28:3811157	0/0:20,0:23:42:0,42,369	0/0:25,0:25:51:0,51,475	0/0:24,0:24:60:0,60,540	1/1:0,38:40:87:936,87,0	1/1:0,32:32:78:836,78,0	1/1:0,38:38:75:799,75,0
28	3811508	rs739332144	28:3811508	0/0:22,0:24:48:0,48,456	0/0:25,0:25:51:0,51,499	0/0:32,0:32:66:0,66,643	1/1:0,26:26:66:703,66,0	1/1:0,39:40:99:1226,114,0	1/1:0,39:39:96:1051,96,0
28	4172236	rs314598790	28:4172236	1/1:0,34:34:75:746,75,0	1/1:0,25:27:60:620,60,0	1/1:0,28:28:69:692,69,0	0/0:35,0:35:90:0,90,912	0/0:39,0:39:96:0,96,1027	0/0:35,0:35:90:0,90,957
28	4172574	rs14307817	28:4172574	1/1:0,35:36:84:726,84,0	1/1:1,17:18:11:308,11,0	1/1:0,34:35:66:586,66,0	0/0:35,0:38:87:0,87,967	0/0:35,0:35:93:0,93,1029	0/0:35,0:35:99:0,99,1099
28	4175957	rs315660996	28:4175957	1/1:0,30:31:66:621,66,0	1/1:0,23:23:54:497,54,0	1/1:0,26:26:54:482,54,0	0/0:27,0:27:69:0,69,739	0/0:33,0:33:90:0,90,996	0/0:37,0:37:99:0,99,1082
28	4178201	rs312522596	28:4178201	1/1:0,34:35:84:902,84,0	1/1:0,39:40:99:1015,99,0	1/1:0,25:25:60:628,60,0	0/0:38,0:38:99:0,108,1130	0/0:32,0:32:90:0,90,993	0/0:41,0:41:99:0,108,1147
Z	899765	rs314807845	Z:899765	0/0:26,0:27:66:0,66,620	0/0:28,0:30:63:0,63,638	0/0:25,0:25:60:0,60,605	1/1:0,9:11:24:256,24,0	1/1:0,13:13:36:379,36,0	1/1:0,12:12:33:354,33,0
Z	904386	rs10731255	Z:904386	1/1:0,37:38:90:902,90,0	1/1:0,45:45:96:977,96,0	1/1:0,33:34:87:900,87,0	0/0:21,0:24:45:0,45,479	0/0:26,0:26:57:0,57,609	0/0:14,0:16:36:0,36,386
Z	904474	rs733269906	Z:904474	1/1:0,44:46:99:1226,114,0	1/1:0,32:32:75:810,75,0	1/1:0,45:45:99:1221,114,0	0/0:25,0:25:66:0,66,613	0/0:19,0:19:57:0,57,527	0/0:21,0:21:57:0,57,548
Z	1061908	rs316610851	Z:1061908	0/0:24,0:24:54:0,54,557	0/0:25,0:25:60:0,60,637	0/0:24,0:25:57:0,57,601	1/1:0,20:20:51:499,51,0	1/1:0,18:19:42:411,42,0	1/1:0,25:25:66:606,66,0
Z	1066903	rs738216695	Z:1066903	0/0:28,0:31:48:0,48,509	0/0:22,0:24:48:0,48,503	0/0:18,0:18:33:0,33,336	1/1:0,13:14:36:360,36,0	1/1:0,12:12:33:331,33,0	1/1:0,17:17:39:356,39,0
Z	1068121	rs312925287	Z:1068121	0/0:25,0:25:45:0,45,464	0/0:17,0:18:24:0,24,236	0/0:27,0:27:63:0,63,656	1/1:0,11:11:21:187,21,0	1/1:0,15:15:33:319,33,0	1/1:0,20:20:36:322,36,0
Z	2176925	rs317693428	Z:2176925	0/0:29,1:30:66:0,66,643	0/0:36,1:38:75:0,75,715	0/0:22,0:22:45:0,45,422	1/1:0,16:16:33:328,33,0	1/1:0,19:19:45:418,45,0	1/1:0,18:18:42:408,42,0
Z	2204698	rs313057498	Z:2204698	1/1:0,24:25:60:543,60,0	1/1:0,36:37:87:844,87,0	1/1:0,29:29:60:608,60,0	0/0:14,0:14:42:0,42,452	0/0:20,0:20:57:0,57,633	0/0:11,0:11:27:0,27,301
Z	8989506	rs735298472	Z:8989506	1/1:0,27:27:54:534,54,0	1/1:0,16:16:42:408,42,0	1/1:0,24:27:54:555,54,0	0/0:13,0:13:30:0,30,325	0/0:17,0:17:51:0,51,543	0/0:12,0:12:33:0,33,354
Z	8991277	rs741736810	Z:8991277	0/0:16,0:18:33:0,33,284	0/0:24,0:24:57:0,57,537	0/0:25,0:25:48:0,48,442	1/1:0,10:10:27:278,27,0	1/1:0,15:17:33:349,33,0	1/1:0,13:13:27:295,27,0
Z	9575335	rs14784804	Z:9575335	1/1:0,34:35:96:987,96,0	1/1:0,36:36:99:1029,99,0	1/1:0,44:44:99:1207,120,0	0/0:26,0:26:66:0,66,707	0/0:25,0:25:72:0,72,746	0/0:21,0:21:48:0,48,495
Z	9591300	rs16780405	Z:9591300	0/0:25,0:26:54:0,54,540	0/0:31,0:31:60:0,60,666	0/0:25,0:25:66:0,66,670	1/1:0,15:15:36:381,36,0	1/1:0,22:22:54:577,54,0	1/1:0,17:18:45:483,45,0
Z	9601248	.	Z:9601248	1/1:0,21:27:39:382,39,0	1/1:1,12:14:18:180,18,0	1/1:2,18:26:30:296,30,0	0/0:10,0:10:27:0,27,301	0/0:16,0:16:39:0,39,418	0/0:18,0:18:39:0,39,411
Z	13576689	rs16103170	Z:13576689	0/0:27,0:28:69:0,69,661	0/0:21,0:22:54:0,54,548	0/0:46,0:46:99:0,111,1139	1/1:0,21:21:54:599,54,0	1/1:0,17:17:48:521,48,0	1/1:0,21:21:54:590,54,0
Z	13576945	rs315422536	Z:13576945	0/0:33,0:34:78:0,78,807	0/0:31,0:31:72:0,72,725	0/0:30,0:32:51:0,51,533	1/1:0,29:29:78:858,78,0	1/1:0,22:22:60:639,60,0	1/1:0,21:21:63:663,63,0
Z	13576949	rs314333266	Z:13576949	0/0:35,0:36:84:0,84,833	0/0:30,0:31:72:0,72,740	0/0:32,0:33:81:0,81,811	1/1:0,27:29:75:776,75,0	1/1:0,22:22:51:547,51,0	1/1:0,22:22:42:432,42,0
Z	16438209	rs315783218	Z:16438209	0/0:33,0:33:93:0,93,1006	0/0:32,0:32:87:0,87,917	0/0:29,0:29:78:0,78,852	1/1:0,16:16:45:417,45,0	1/1:0,22:22:51:503,51,0	1/1:0,14:14:42:396,42,0
Z	16438656	rs314271985	Z:16438656	0/0:43,0:43:99:0,117,1189	0/0:30,0:30:69:0,69,743	0/0:34,1:35:78:0,78,820	1/1:0,9:9:27:293,27,0	1/1:0,22:23:54:582,54,0	1/1:0,18:18:48:548,48,0
Z	16438998	rs315937177	Z:16438998	0/0:42,0:42:96:0,96,950	0/0:23,0:23:48:0,48,473	0/0:34,0:34:69:0,69,702	1/1:0,18:18:48:512,48,0	1/1:0,23:23:66:722,66,0	1/1:0,23:23:63:688,63,0
Z	16439451	rs318060978	Z:16439451	0/0:38,0:38:87:0,87,897	0/0:32,0:32:93:0,93,1021	0/0:33,0:33:81:0,81,867	1/1:0,9:9:18:167,18,0	1/1:0,24:24:63:589,63,0	1/1:1,19:20:48:458,48,0
Z	16439542	rs313732089	Z:16439542	0/0:33,0:34:84:0,84,771	0/0:33,0:34:72:0,72,662	0/0:31,0:32:84:0,84,816	1/1:0,19:19:54:571,54,0	1/1:0,18:18:45:471,45,0	1/1:0,21:21:48:515,48,0
Z	16439926	rs317629932	Z:16439926	0/0:33,0:34:84:0,84,880	0/0:33,0:34:81:0,81,848	0/0:38,0:38:93:0,93,990	1/1:0,17:17:39:384,39,0	1/1:0,13:13:36:377,36,0	1/1:0,21:21:54:531,54,0
Z	16440118	rs318124241	Z:16440118	0/0:26,0:26:66:0,66,699	0/0:26,0:27:69:0,69,750	0/0:25,0:25:63:0,63,659	1/1:0,19:19:54:564,54,0	1/1:0,13:13:33:359,33,0	1/1:0,11:11:33:353,33,0
Z	21147609	rs315471223	Z:21147609	1/1:0,36:37:84:875,84,0	1/1:0,24:26:48:486,48,0	1/1:0,39:40:99:1017,102,0	0/0:8,1:9:21:0,21,211	0/0:20,0:20:51:0,51,517	0/0:14,0:14:36:0,36,371
Z	21149482	rs317877142	Z:21149482	0/0:31,0:32:75:0,75,773	0/0:24,0:24:60:0,60,605	0/0:30,0:30:75:0,75,783	1/1:0,23:23:63:655,63,0	1/1:0,15:15:42:450,42,0	1/1:1,26:27:72:755,72,0
Z	21149761	rs314975729	Z:21149761	0/0:33,0:33:66:0,66,653	0/0:17,0:17:45:0,45,471	0/0:31,0:31:72:0,72,728	1/1:0,25:25:69:747,69,0	1/1:0,17:17:48:550,48,0	1/1:0,17:18:42:444,42,0
Z	21150157	rs732287959	Z:21150157	1/1:0,32:32:81:850,81,0	1/1:0,17:18:45:460,45,0	1/1:0,42:42:99:1206,117,0	0/0:14,0:15:33:0,33,326	0/0:19,0:19:54:0,54,552	0/0:23,0:23:51:0,51,492
Z	21150876	rs315392377	Z:21150876	1/1:0,27:27:66:682,66,0	1/1:0,29:30:57:605,57,0	1/1:0,29:31:63:648,63,0	0/0:19,0:19:45:0,45,492	0/0:12,0:12:36:0,36,371	0/0:24,0:24:69:0,69,722
Z	21150890	rs315253026	Z:21150890	1/1:0,26:27:66:708,66,0	1/1:0,29:29:72:784,72,0	1/1:0,33:33:84:867,84,0	0/0:17,0:17:48:0,48,497	0/0:12,0:12:33:0,33,353	0/0:21,0:22:60:0,60,628
Z	21150946	rs318155805	Z:21150946	1/1:1,29:30:72:760,72,0	1/1:1,30:31:75:757,75,0	1/1:1,30:32:78:809,78,0	0/0:8,0:8:21:0,21,232	0/0:15,0:15:33:0,33,363	0/0:18,0:18:51:0,51,546
Z	21152221	rs734185124	Z:21152221	1/1:0,29:29:78:861,78,0	1/1:0,29:30:72:765,72,0	1/1:0,28:28:69:738,69,0	0/0:13,0:14:36:0,36,397	0/0:15,0:15:33:0,33,364	0/0:18,0:20:51:0,51,561
Z	21152222	rs738506154	Z:21152222	1/1:0,29:29:75:819,75,0	1/1:0,30:30:75:773,75,0	1/1:0,28:28:63:645,63,0	0/0:14,0:14:39:0,39,429	0/0:15,0:15:30:0,30,325	0/0:20,0:20:45:0,45,484
Z	21152411	rs317740723	Z:21152411	1/1:0,30:30:78:813,78,0	1/1:0,40:40:99:1123,105,0	1/1:0,33:33:90:968,90,0	0/0:23,1:24:33:0,33,551	0/0:29,0:29:63:0,63,664	0/0:17,0:17:45:0,45,475
Z	21152512	rs734445107	Z:21152512	1/1:0,33:34:84:850,84,0	1/1:0,37:39:90:914,90,0	1/1:0,20:20:48:456,48,0	0/0:21,0:21:54:0,54,506	0/0:19,0:19:51:0,51,512	0/0:18,0:19:54:0,54,536
Z	21152542	rs737701304	Z:21152542	1/1:0,30:30:75:776,75,0	1/1:1,42:44:99:1033,102,0	1/1:0,23:23:45:471,45,0	0/0:15,1:16:39:0,39,419	0/0:20,0:20:54:0,54,616	0/0:20,0:20:57:0,57,623
Z	21152839	rs316290949	Z:21152839	1/1:0,27:27:78:803,78,0	1/1:0,34:34:96:1007,96,0	1/1:0,26:26:69:736,69,0	0/0:15,0:15:42:0,42,471	0/0:19,1:20:57:0,57,613	0/0:26,1:27:63:0,63,674
Z	21153688	rs313802206	Z:21153688	1/1:0,34:35:99:1026,99,0	1/1:0,27:27:72:731,72,0	1/1:0,17:17:39:410,39,0	0/0:17,0:17:45:0,45,405	0/0:25,0:25:66:0,66,621	0/0:15,0:15:30:0,30,275
Z	21154648	rs14754957	Z:21154648	0/0:32,0:34:78:0,78,796	0/0:19,0:21:51:0,51,540	0/0:33,0:33:81:0,81,877	1/1:0,17:17:42:449,42,0	1/1:0,24:24:63:679,63,0	1/1:0,28:28:75:815,75,0
Z	21775787	rs316133125	Z:21775787	1/1:0,31:32:57:535,57,0	1/1:0,25:25:48:424,48,0	1/1:0,29:30:51:472,51,0	0/0:20,0:20:57:0,57,606	0/0:20,0:20:60:0,60,662	0/0:16,0:16:36:0,36,386
Z	21775814	rs312578914	Z:21775814	0/0:22,1:24:45:0,45,450	0/0:26,0:27:54:0,54,557	0/0:24,0:24:54:0,54,542	1/1:0,18:18:51:511,51,0	1/1:0,17:17:48:495,48,0	1/1:0,15:15:36:366,36,0
Z	21775852	rs317178354	Z:21775852	1/1:0,24:24:45:451,45,0	1/1:0,26:27:45:467,45,0	1/1:0,22:22:51:554,51,0	0/0:19,0:19:48:0,48,537	0/0:12,0:12:36:0,36,392	0/0:11,0:11:27:0,27,294
Z	21775882	rs317186393	Z:21775882	1/1:0,16:17:39:413,39,0	1/1:1,20:21:23:493,23,0	1/1:0,23:23:48:512,48,0	0/0:20,0:20:51:0,51,516	0/0:15,0:15:45:0,45,473	0/0:14,0:14:30:0,30,315
Z	23680184	rs733255817	Z:23680184	0/0:31,0:32:66:0,66,712	0/0:24,0:24:51:0,51,521	0/0:29,0:35:60:0,60,622	1/1:0,14:14:33:335,33,0	1/1:0,26:26:66:643,66,0	1/1:0,22:22:48:442,48,0
Z	23692824	rs313636232	Z:23692824	1/1:0,36:37:99:1029,99,0	1/1:1,36:38:93:996,93,0	1/1:0,40:40:96:947,96,0	0/0:27,0:27:69:0,69,730	0/0:20,0:20:57:0,57,617	0/0:28,0:28:75:0,75,839
Z	23699059	rs10722155	Z:23699059	1/1:0,38:38:93:925,93,0	1/1:0,35:35:75:717,75,0	1/1:0,35:35:87:849,87,0	0/0:25,0:25:75:0,75,792	0/0:23,1:24:60:0,60,644	0/0:19,0:19:48:0,48,514
Z	24443548	rs741793407	Z:24443548	0/0:24,0:25:57:0,57,587	0/0:22,0:24:60:0,60,598	0/0:29,0:29:75:0,75,776	1/1:0,10:10:30:319,30,0	1/1:1,15:16:42:455,42,0	1/1:0,18:18:48:536,48,0
Z	24503544	rs317231339	Z:24503544	0/0:22,0:23:54:0,54,531	0/0:41,1:42:84:0,84,881	0/0:29,0:29:72:0,72,751	1/1:0,20:20:42:439,42,0	1/1:0,17:17:48:509,48,0	1/1:0,18:18:42:460,42,0
Z	26244633	rs313477155	Z:26244633	0/0:21,0:22:39:0,39,399	0/0:22,0:22:42:0,42,417	0/0:22,1:23:45:0,45,452	1/1:0,22:22:54:578,54,0	1/1:0,24:24:63:669,63,0	1/1:0,16:16:39:422,39,0
Z	26287248	rs313783320	Z:26287248	0/0:37,0:40:87:0,87,913	0/0:21,0:21:57:0,57,606	0/0:30,1:32:69:0,69,710	1/1:0,22:22:57:587,57,0	1/1:0,25:27:60:625,60,0	1/1:0,22:22:57:605,57,0
Z	26424657	rs317219970	Z:26424657	0/0:26,0:26:69:0,69,704	0/0:34,0:34:93:0,93,915	0/0:27,0:27:66:0,66,664	1/1:0,13:13:36:398,36,0	1/1:0,14:14:39:419,39,0	1/1:0,16:16:42:442,42,0
Z	26427704	rs317592904	Z:26427704	1/1:0,33:34:78:793,78,0	1/1:0,30:32:81:824,81,0	1/1:0,27:27:66:695,66,0	0/0:21,0:21:60:0,60,574	0/0:23,0:23:63:0,63,603	0/0:20,0:22:48:0,48,464
Z	26429706	rs14777636	Z:26429706	0/0:45,0:46:99:0,117,1223	0/0:27,0:28:75:0,75,756	0/0:37,1:38:96:0,96,986	1/1:0,14:14:39:430,39,0	1/1:0,22:22:54:588,54,0	1/1:0,20:20:57:611,57,0
Z	27391797	rs737506659	Z:27391797	0/0:27,0:28:60:0,60,618	0/0:30,0:31:66:0,66,652	0/0:27,0:28:60:0,60,615	1/1:0,13:13:36:378,36,0	1/1:0,20:20:51:529,51,0	1/1:0,16:16:36:377,36,0
Z	27391798	rs739521037	Z:27391798	0/0:24,2:27:54:0,54,531	0/0:28,2:31:60:0,60,591	0/0:27,1:28:66:0,66,659	1/1:0,13:13:30:304,30,0	1/1:0,20:20:36:383,36,0	1/1:0,16:16:39:379,39,0
Z	27438584	rs10721907	Z:27438584	0/0:27,0:27:66:0,66,623	0/0:36,0:36:69:0,69,666	0/0:27,0:27:63:0,63,562	1/1:0,17:17:48:530,48,0	1/1:0,18:18:48:497,48,0	1/1:0,24:25:69:736,69,0
Z	27456670	rs313200454	Z:27456670	0/0:31,0:31:78:0,78,791	0/0:28,0:28:81:0,81,857	0/0:40,0:40:99:0,99,999	1/1:0,20:20:60:655,60,0	1/1:0,33:33:93:1008,93,0	1/1:0,20:20:60:639,60,0
Z	30830307	rs313138472	Z:30830307	0/0:31,1:32:69:0,69,666	0/0:27,1:28:66:0,66,631	0/0:17,2:19:20:0,20,381	1/1:1,22:23:60:647,60,0	1/1:1,25:26:69:735,69,0	1/1:0,20:20:54:560,54,0
Z	30896330	rs734198139	Z:30896330	1/1:0,20:20:54:546,54,0	1/1:0,26:27:63:638,63,0	1/1:0,35:35:75:770,75,0	0/0:24,0:24:54:0,54,591	0/0:19,0:19:57:0,57,626	0/0:15,0:15:45:0,45,448
Z	31815762	rs314975171	Z:31815762	1/1:0,42:42:99:1079,105,0	1/1:0,32:32:81:850,81,0	1/1:0,31:33:63:626,63,0	0/0:22,0:22:63:0,63,658	0/0:26,0:26:66:0,66,703	0/0:30,0:30:72:0,72,755
Z	31830168	rs313808611	Z:31830168	0/0:26,0:28:48:0,48,489	0/0:32,0:33:69:0,69,718	0/0:28,0:31:48:0,48,501	1/1:0,11:11:30:276,30,0	1/1:0,12:12:30:287,30,0	1/1:0,10:10:30:290,30,0
Z	34027169	rs13795436	Z:34027169	0/0:34,0:36:78:0,78,778	0/0:41,0:43:96:0,96,958	0/0:40,0:40:99:0,99,991	1/1:0,11:13:27:296,27,0	1/1:0,22:23:33:361,33,0	1/1:0,13:15:36:376,36,0
Z	34034396	rs316746614	Z:34034396	0/0:20,0:21:45:0,45,469	0/0:30,0:31:69:0,69,701	0/0:34,0:34:87:0,87,915	1/1:0,26:26:75:832,75,0	1/1:0,15:15:36:390,36,0	1/1:0,23:24:51:574,51,0
Z	34042155	rs14761217	Z:34042155	0/0:37,0:39:93:0,93,988	0/0:26,0:26:60:0,60,626	0/0:32,0:33:96:0,96,989	1/1:0,21:21:51:555,51,0	1/1:0,23:23:66:723,66,0	1/1:0,20:20:48:531,48,0
Z	34059026	rs314747053	Z:34059026	0/0:35,0:35:78:0,78,741	0/0:32,0:32:72:0,72,662	0/0:36,0:37:60:0,60,553	1/1:0,23:23:63:651,63,0	1/1:0,27:27:60:633,60,0	1/1:0,13:13:27:306,27,0
Z	34068390	rs317036257	Z:34068390	0/0:38,0:38:99:0,108,1116	0/0:24,0:26:63:0,63,668	0/0:37,1:39:96:0,96,983	1/1:0,22:22:57:599,57,0	1/1:0,18:18:45:487,45,0	1/1:0,18:18:51:540,51,0
Z	34072679	rs313141003	Z:34072679	0/0:38,0:39:84:0,84,861	0/0:33,1:34:57:0,57,563	0/0:21,0:21:42:0,42,437	1/1:0,17:17:48:498,48,0	1/1:0,21:21:60:622,60,0	1/1:0,24:24:60:626,60,0
Z	37496765	rs13783879	Z:37496765	0/0:48,1:49:99:0,123,1299	0/0:34,0:35:87:0,87,904	0/0:45,0:45:99:0,111,1164	1/1:0,22:23:60:595,60,0	1/1:0,20:20:48:458,48,0	1/1:0,25:25:63:602,63,0
Z	37503806	rs738262005	Z:37503806	0/0:33,0:34:90:0,90,951	0/0:43,0:45:99:0,108,1125	0/0:30,0:30:63:0,63,646	1/1:0,18:18:51:535,51,0	1/1:0,11:11:33:361,33,0	1/1:0,13:13:36:374,36,0
Z	37512593	rs317590581	Z:37512593	0/0:44,0:44:99:0,114,1179	0/0:32,0:32:81:0,81,844	0/0:36,0:36:93:0,93,980	1/1:0,23:23:60:599,60,0	1/1:0,24:24:66:655,66,0	1/1:0,21:21:63:633,63,0
Z	37516346	rs315069192	Z:37516346	0/0:40,0:41:84:0,84,809	0/0:32,0:34:78:0,78,728	0/0:37,0:37:87:0,87,824	1/1:0,19:19:54:604,54,0	1/1:0,29:29:78:834,78,0	1/1:0,21:21:54:605,54,0
Z	37797316	rs318036196	Z:37797316	0/0:42,0:43:99:0,114,1170	0/0:31,0:31:87:0,87,881	0/0:34,0:34:87:0,87,924	1/1:0,29:29:75:810,75,0	1/1:0,14:14:33:351,33,0	1/1:0,21:21:63:691,63,0
Z	37800580	rs739046220	Z:37800580	0/0:32,0:32:90:0,90,950	0/0:25,0:25:66:0,66,689	0/0:29,0:30:57:0,57,597	1/1:0,16:16:39:400,39,0	1/1:0,21:22:57:566,57,0	1/1:0,29:29:66:630,66,0
Z	37807096	.	Z:37807096	0/0:33,0:33:63:0,63,591	0/0:17,0:17:27:0,27,257	0/0:41,0:41:87:0,87,804	1/1:0,14:14:42:455,42,0	1/1:0,20:20:60:637,60,0	1/1:0,15:15:39:427,39,0
Z	37816952	rs14765817	Z:37816952	0/0:32,0:33:75:0,75,765	0/0:40,0:40:99:0,99,1003	0/0:36,0:36:84:0,84,868	1/1:0,22:24:54:602,54,0	1/1:0,31:31:81:853,81,0	1/1:0,27:27:72:784,72,0
Z	39920961	rs315157622	Z:39920961	0/0:38,0:38:87:0,87,857	0/0:29,0:29:66:0,66,718	0/0:26,0:26:60:0,60,614	1/1:0,28:28:72:761,72,0	1/1:0,27:27:72:802,72,0	1/1:0,9:9:24:250,24,0
Z	39921019	rs317011239	Z:39921019	0/0:35,0:36:93:0,93,929	0/0:36,0:36:75:0,75,757	0/0:28,0:28:63:0,63,598	1/1:0,23:23:51:489,51,0	1/1:0,23:23:60:591,60,0	1/1:0,11:11:30:284,30,0
Z	39921265	rs313412478	Z:39921265	0/0:43,0:44:99:0,102,939	0/0:29,0:30:63:0,63,607	0/0:35,0:36:84:0,84,782	1/1:0,18:18:48:531,48,0	1/1:0,30:30:84:941,84,0	1/1:0,24:24:63:681,63,0
Z	41350447	rs313700216	Z:41350447	0/0:34,0:35:87:0,87,925	0/0:35,0:36:87:0,87,908	0/0:38,0:38:84:0,84,838	1/1:0,17:17:45:484,45,0	1/1:0,17:17:48:527,48,0	1/1:0,15:15:42:465,42,0
Z	41350627	rs318057117	Z:41350627	0/0:24,0:25:63:0,63,634	0/0:29,0:29:84:0,84,862	0/0:30,0:32:84:0,84,876	1/1:0,20:20:60:607,60,0	1/1:0,23:23:63:690,63,0	1/1:0,22:22:51:528,51,0
Z	44509586	rs312412336	Z:44509586	0/0:33,0:35:93:0,93,973	0/0:36,0:37:96:0,96,1003	0/0:35,0:35:84:0,84,894	1/1:0,18:18:51:514,51,0	1/1:0,17:17:45:442,45,0	1/1:0,27:27:72:687,72,0
Z	44530996	rs315430994	Z:44530996	0/0:33,0:33:75:0,75,791	0/0:27,0:28:75:0,75,805	0/0:25,0:26:69:0,69,708	1/1:0,23:23:54:529,54,0	1/1:0,10:10:21:207,21,0	1/1:0,12:13:36:339,36,0
Z	46080869	rs314833760	Z:46080869	0/0:21,0:23:54:0,54,582	0/0:32,0:32:84:0,84,916	0/0:38,0:38:93:0,93,992	1/1:0,16:16:48:509,48,0	1/1:0,20:20:60:647,60,0	1/1:0,21:21:51:549,51,0
Z	46097896	rs316041365	Z:46097896	0/0:35,0:36:84:0,84,866	0/0:34,0:34:75:0,75,775	0/0:26,0:26:66:0,66,690	1/1:0,14:14:36:389,36,0	1/1:0,26:26:72:753,72,0	1/1:0,15:15:33:342,33,0
Z	46097917	rs317528641	Z:46097917	0/0:34,0:35:78:0,78,820	0/0:31,0:34:57:0,57,576	0/0:30,0:31:60:0,60,634	1/1:0,13:13:30:309,30,0	1/1:0,26:26:69:697,69,0	1/1:1,13:14:33:344,33,0
Z	51882820	rs317025973	Z:51882820	0/0:45,0:45:99:0,111,1126	0/0:23,0:23:57:0,57,625	0/0:36,0:36:93:0,93,941	1/1:1,13:14:33:344,33,0	1/1:0,16:16:33:355,33,0	1/1:0,14:14:42:431,42,0
Z	51884220	rs312926951	Z:51884220	0/0:30,0:30:81:0,81,815	0/0:45,0:45:99:0,129,1350	0/0:30,0:30:87:0,87,925	1/1:0,23:23:63:683,63,0	1/1:0,27:28:78:836,78,0	1/1:0,18:18:54:574,54,0
Z	51884339	rs317615410	Z:51884339	0/0:40,0:40:99:0,102,1051	0/0:35,0:35:75:0,75,773	0/0:32,0:33:78:0,78,840	1/1:0,17:17:48:527,48,0	1/1:0,15:16:39:428,39,0	1/1:1,15:16:16:362,16,0
Z	51884585	rs316586630	Z:51884585	1/1:0,34:36:87:821,87,0	1/1:0,20:21:36:355,36,0	1/1:0,18:18:42:400,42,0	0/0:16,0:16:42:0,42,454	0/0:18,0:18:45:0,45,492	0/0:22,0:22:63:0,63,672
Z	51895084	rs316017016	Z:51895084	1/1:1,27:28:57:587,57,0	1/1:0,21:22:48:499,48,0	1/1:1,29:30:45:450,45,0	0/0:22,0:22:51:0,51,527	0/0:19,0:19:54:0,54,597	0/0:21,0:21:45:0,45,489
Z	56831435	rs16096662	Z:56831435	0/0:32,0:33:75:0,75,751	0/0:20,0:20:42:0,42,389	0/0:30,0:30:72:0,72,675	1/1:0,28:28:75:833,75,0	1/1:0,20:20:60:644,60,0	1/1:0,14:14:39:422,39,0
Z	56841253	rs14750659	Z:56841253	0/0:30,0:30:81:0,81,871	0/0:31,0:31:84:0,84,883	0/0:34,0:34:90:0,90,950	1/1:1,21:22:54:582,54,0	1/1:0,22:22:60:648,60,0	1/1:0,11:11:33:353,33,0
Z	56842921	rs317859605	Z:56842921	0/0:33,0:33:66:0,66,628	0/0:40,0:40:84:0,84,781	0/0:34,0:36:75:0,75,704	1/1:0,14:14:42:434,42,0	1/1:0,18:18:51:576,51,0	1/1:0,24:24:66:722,66,0
Z	59546302	rs314785247	Z:59546302	1/1:0,44:44:99:1181,117,0	1/1:0,33:33:87:891,87,0	1/1:0,34:34:84:879,84,0	0/0:14,0:14:33:0,33,361	0/0:12,0:12:36:0,36,393	0/0:16,0:16:45:0,45,500
Z	59547533	rs312936953	Z:59547533	1/1:0,42:42:99:1178,114,0	1/1:0,35:35:90:939,90,0	1/1:0,35:37:75:785,75,0	0/0:30,0:30:66:0,66,694	0/0:30,0:31:84:0,84,894	0/0:22,0:22:57:0,57,586
Z	63760199	rs10722090	Z:63760199	0/0:39,0:39:96:0,96,1011	0/0:37,2:39:99:0,99,1042	0/0:33,0:33:81:0,81,865	1/1:0,22:22:51:551,51,0	1/1:0,29:29:72:782,72,0	1/1:0,18:18:48:516,48,0
Z	63874486	rs312420562	Z:63874486	1/1:1,38:40:90:926,90,0	1/1:0,23:23:66:647,66,0	1/1:4,25:31:38:628,38,0	0/0:11,0:11:33:0,33,351	0/0:27,0:27:66:0,66,722	0/0:26,0:26:72:0,72,786
Z	63874510	rs314535094	Z:63874510	1/1:2,41:43:90:902,90,0	1/1:1,21:22:45:470,45,0	1/1:0,25:26:51:512,51,0	0/0:12,1:13:27:0,27,281	0/0:25,0:25:60:0,60,641	0/0:25,0:25:72:0,72,769
Z	63876940	.	Z:63876940	0/0:38,0:39:78:0,78,738	0/0:24,0:24:39:0,39,347	0/0:34,1:35:78:0,78,709	1/1:0,17:17:36:370,36,0	1/1:0,30:30:72:762,72,0	1/1:0,12:12:24:260,24,0
Z	63877019	.	Z:63877019	1/1:0,24:24:54:563,54,0	1/1:0,25:28:57:612,57,0	1/1:0,35:36:78:832,78,0	0/0:15,0:15:36:0,36,321	0/0:26,0:26:63:0,63,611	0/0:20,0:20:51:0,51,489
Z	63892788	rs10728609	Z:63892788	0/0:30,0:31:78:0,78,789	0/0:32,0:33:81:0,81,866	0/0:29,0:30:81:0,81,863	1/1:0,22:22:63:676,63,0	1/1:0,16:16:48:529,48,0	1/1:0,22:23:60:655,60,0
Z	78445016	rs316391660	Z:78445016	0/0:26,0:27:66:0,66,663	0/0:32,0:33:75:0,75,761	0/0:32,0:32:72:0,72,728	1/1:0,23:23:69:732,69,0	1/1:0,23:23:54:562,54,0	1/1:0,19:19:51:530,51,0
Z	78445275	rs13800493	Z:78445275	0/0:39,0:41:99:0,102,1040	0/0:31,0:31:78:0,78,783	0/0:40,0:43:99:0,102,1031	1/1:0,24:24:60:657,60,0	1/1:0,24:25:66:711,66,0	1/1:0,24:25:48:518,48,0
Z	78445596	rs15992216	Z:78445596	0/0:25,0:25:54:0,54,546	0/0:25,0:25:60:0,60,656	0/0:35,0:35:87:0,87,880	1/1:0,25:25:63:682,63,0	1/1:0,17:18:48:523,48,0	1/1:1,17:19:48:515,48,0
Z	78751037	rs317018616	Z:78751037	1/1:1,38:39:99:989,99,0	1/1:0,17:18:48:498,48,0	1/1:0,24:25:57:563,57,0	0/0:19,0:19:51:0,51,558	0/0:10,1:12:27:0,27,260	0/0:23,0:24:63:0,63,683
Z	78763023	rs15992676	Z:78763023	0/0:39,0:39:99:0,108,1128	0/0:39,0:39:99:0,111,1162	0/0:47,0:47:99:0,105,1112	1/1:0,25:25:66:677,66,0	1/1:0,21:22:51:515,51,0	1/1:0,15:15:39:423,39,0
Z	81091443	rs316617773	Z:81091443	0/0:36,0:37:84:0,84,850	0/0:29,0:29:78:0,78,809	0/0:33,0:33:90:0,90,968	1/1:0,23:23:63:657,63,0	1/1:0,20:20:51:541,51,0	1/1:0,16:16:42:458,42,0
Z	81093412	rs312542675	Z:81093412	1/1:0,34:35:84:852,84,0	1/1:0,35:36:87:909,87,0	1/1:0,30:30:69:721,69,0	0/0:21,0:21:57:0,57,592	0/0:24,0:24:69:0,69,739	0/0:13,0:14:36:0,36,371
Z	81805014	rs313200091	Z:81805014	0/0:31,0:32:72:0,72,761	0/0:20,1:21:45:0,45,495	0/0:26,0:27:54:0,54,566	1/1:0,14:15:30:306,30,0	1/1:0,24:25:42:408,42,0	1/1:0,17:17:39:385,39,0
Z	81810273	rs317879941	Z:81810273	0/0:23,0:23:57:0,57,603	0/0:33,0:33:81:0,81,827	0/0:30,0:31:72:0,72,717	1/1:0,17:17:48:515,48,0	1/1:0,17:18:48:521,48,0	1/1:0,17:17:51:551,51,0

## Sheet: Supplementary file 5C
Supplementary file 5C. Detected SNPs on each chromosome from the WTS data
Chr.	Length	Variants	Chr.	Length	Variants
1	195276750	39875	17	10454150	5283
2	148809762	27170	18	11219875	5386
3	110447801	25102	19	9983394	5179
4	90216835	23099	20	14302601	5509
5	59580361	20014	21	6802778	4129
6	34951654	10772	22	4081097	706
7	36245040	11061	23	5723239	2781
8	28767244	10114	24	6323281	2620
9	23441680	8168	25	2191139	1086
10	19911089	7792	26	5329985	3488
11	19401079	6046	27	5209285	2441
12	19897011	6346	28	4742627	3630
13	17760035	5786	W	1248174	92
14	15161805	8312	Z	82363669	7019
15	12656803	6293	Total	1003035513	265788
16	535270	489

## Sheet: Supplementary file 5D
Supplementary file 5D. Quality information for detected SNPs in WTS data
Chr	Pos	Rs_id	ID	QUAL	FILTER	FORMAT	Oocyte_WF13	Oocyte_WF6	Oocyte_WF7	Zygote_WF13xKM4	Zygote_WF6xKM6	Zygote_WF7xKM7	StageX_WF13xKM4	StageX_WF6xKM6	StageX_WF7xKM7
1	923978	rs15013077	1:923978	16880.4	PASS	GT:AD:DP:GQ:PL	1/1:0,57:57:99:1639,169,0	1/1:0,87:87:99:2632,260,0	1/1:0,31:31:93:946,93,0	1/1:0,200:200:99:5789,594,0	1/1:0,63:63:99:1871,187,0	1/1:0,65:65:99:2015,195,0	0/1:23,21:44:99:493,0,527	0/1:26,17:43:99:413,0,698	0/1:38,45:83:99:1127,0,961
1	924775	rs15743147	1:924775	2523.36	PASS	GT:AD:DP:GQ:PL	0/0:86,0:86:99:0,256,2478	0/0:176,0:176:99:0,531,6481	0/0:59,0:59:99:0,180,2199	0/0:340,0:340:99:0,1013,12166	0/0:144,0:144:99:0,431,4211	0/0:91,0:91:99:0,272,3135	0/1:43,28:71:99:602,0,1050	0/1:44,36:80:99:782,0,1003	0/1:48,49:97:99:1184,0,1130
1	974982	rs15743250	1:974982	1675.36	PASS	GT:AD:DP:GQ:PL	0/0:119,0:119:99:0,350,2992	0/0:228,0:228:99:0,675,5981	0/0:57,0:57:99:0,168,1503	0/0:401,0:401:99:0,1187,10560	0/0:189,0:189:99:0,563,5200	0/0:166,0:166:99:0,494,4533	0/1:60,27:87:99:513,0,1420	0/1:46,15:61:99:216,0,1045	0/1:81,49:130:99:991,0,1819
1	991573	.	1:991573	2851.36	PASS	GT:AD:DP:GQ:PL	0/0:175,0:175:99:0,520,5235	0/0:366,2:368:99:0,1079,10406	0/0:116,0:116:99:0,346,3406	0/0:600,3:603:99:0,1750,17367	0/0:324,3:327:99:0,941,9520	0/0:242,2:244:99:0,709,7165	0/1:87,45:132:99:895,0,2078	0/1:59,34:93:99:618,0,1354	0/1:114,66:180:99:1383,0,2846
1	991890	rs318057844	1:991890	61442.4	PASS	GT:AD:DP:GQ:PL	1/1:0,159:159:99:4645,473,0	1/1:1,287:288:99:10897,862,0	1/1:0,110:110:99:3179,327,0	1/1:0,541:541:99:18907,1612,0	1/1:0,363:363:99:10372,1078,0	1/1:0,234:234:99:6409,696,0	0/1:27,80:107:99:2045,0,523	0/1:27,70:97:99:1750,0,448	0/1:74,88:162:99:3283,0,1616
1	6083503	rs740772166	1:6083503	2554.16	PASS	GT:AD:DP:GQ:PL	1/1:0,8:8:24:239,24,0	1/1:0,14:14:42:393,42,0	1/1:0,8:8:24:193,24,0	1/1:0,2:2:6:49,6,0	1/1:0,4:4:12:99,12,0	1/1:0,1:1:3:36,3,0	0/1:11,12:23:99:263,0,194	0/1:14,23:37:99:501,0,289	0/1:17,37:54:99:824,0,284
1	6084661	rs739772154	1:6084661	54988.4	PASS	GT:AD:DP:GQ:PL	1/1:0,175:175:99:4361,518,0	1/1:2,355:357:99:8962,982,0	1/1:0,151:151:99:3934,450,0	1/1:0,564:564:99:14014,1661,0	1/1:0,287:287:99:7303,852,0	1/1:0,250:250:99:6474,743,0	0/1:96,107:203:99:2316,0,2046	0/1:126,128:254:99:2394,0,2700	0/1:245,262:507:99:5275,0,5127
1	6176912	rs317517219	1:6176912	78715.4	PASS	GT:AD:DP:GQ:PL	1/1:0,469:469:99:14968,1406,0	1/1:0,952:952:99:29998,2853,0	1/1:1,568:569:99:17176,1666,0	1/1:1,235:236:99:6843,665,0	1/1:0,105:105:99:3429,314,0	1/1:0,76:76:99:2524,228,0	0/1:21,47:68:99:1290,0,445	0/1:36,40:76:99:984,0,844	0/1:83,63:146:99:1548,0,2105
1	6180393	rs80737283	1:6180393	2992.36	PASS	GT:AD:DP:GQ:PL	0/0:472,0:472:99:0,1405,14121	0/0:732,0:732:99:0,2184,22280	0/0:527,0:527:99:0,1570,15685	0/0:173,0:173:99:0,512,5066	0/0:125,0:125:99:0,375,3762	0/0:62,0:62:99:0,184,1859	0/1:48,43:91:99:1036,0,936	0/1:40,21:61:99:463,0,942	0/1:66,65:131:99:1538,0,1537
1	6182857	rs312487289	1:6182857	67326.4	PASS	GT:AD:DP:GQ:PL	1/1:0,495:495:99:14103,1475,0	1/1:2,1001:1003:99:27522,2928,0	1/1:0,512:512:99:13530,1528,0	1/1:0,184:184:99:4831,545,0	1/1:0,96:96:99:2602,285,0	1/1:0,56:56:99:1524,167,0	0/1:27,36:63:99:861,0,612	0/1:19,37:56:99:854,0,337	0/1:75,76:151:99:1544,0,1654
1	33605869	rs13848549	1:33605869	2078.36	PASS	GT:AD:DP:GQ:PL	0/0:42,0:42:99:0,125,1527	0/0:92,0:92:99:0,275,2617	0/0:33,0:33:98:0,98,949	0/0:72,0:72:99:0,213,2066	0/0:43,0:43:99:0,128,1574	0/0:38,0:38:99:0,113,1036	0/1:38,40:78:99:907,0,1340	0/1:22,19:41:99:425,0,503	0/1:24,31:55:99:791,0,497
1	33620467	rs313651917	1:33620467	1458.36	PASS	GT:AD:DP:GQ:PL	0/0:31,0:31:93:0,93,958	0/0:84,1:85:99:0,217,2425	0/0:39,0:39:99:0,117,1143	0/0:47,0:47:99:0,139,1337	0/0:28,0:28:84:0,84,809	0/0:26,0:26:78:0,78,785	0/1:23,24:47:99:617,0,507	0/1:12,10:22:99:278,0,301	0/1:35,26:61:99:608,0,865
1	38216694	rs13853716	1:38216694	1557.79	PASS	GT:AD:DP:GQ:PL	1/1:0,1:1:3:35,3,0	1/1:0,6:6:18:193,18,0	1/1:0,4:4:12:128,12,0	1/1:0,18:18:54:539,54,0	1/1:0,2:2:6:49,6,0	1/1:0,2:2:6:69,6,0	0/1:19,5:24:80:80,0,480	0/1:11,11:22:99:248,0,270	0/1:25,14:39:99:259,0,997
1	38217360	rs13752189	1:38217360	2660.65	PASS	GT:AD:DP:GQ:PL	0/0:3,0:3:9:0,9,108	0/0:16,0:16:47:0,47,405	0/0:17,0:17:51:0,51,485	0/0:63,0:63:99:0,187,1765	0/0:31,0:31:91:0,91,885	0/0:21,0:21:63:0,63,632	0/1:22,23:45:99:522,0,538	0/1:37,38:75:99:786,0,782	0/1:45,56:101:99:1397,0,910
1	38217551	rs13752190	1:38217551	3548.36	PASS	GT:AD:DP:GQ:PL	0/0:17,0:17:51:0,51,513	0/0:31,0:31:92:0,92,860	0/0:17,0:17:51:0,51,463	0/0:92,0:92:99:0,272,2553	0/0:35,0:35:99:0,103,951	0/0:31,0:31:92:0,92,839	0/1:47,24:71:99:488,0,1105	0/1:29,51:80:99:1228,0,636	0/1:70,77:147:99:1877,0,1585
1	38217630	rs13752191	1:38217630	4077.36	PASS	GT:AD:DP:GQ:PL	0/0:24,0:24:72:0,72,718	0/0:29,0:29:87:0,87,909	0/0:12,0:12:36:0,36,363	0/0:83,1:84:99:0,240,2457	0/0:38,0:38:99:0,113,1073	0/0:35,0:35:99:0,103,1009	0/1:31,48:79:99:1095,0,645	0/1:31,50:81:99:1300,0,622	0/1:78,75:153:99:1727,0,1850
1	38217840	rs317959149	1:38217840	5225.39	PASS	GT:AD:DP:GQ:PL	1/1:0,7:7:21:192,21,0	1/1:0,10:10:30:290,30,0	1/1:0,11:11:32:260,32,0	1/1:0,68:68:99:1766,200,0	1/1:0,25:25:74:694,74,0	1/1:0,18:18:53:462,53,0	0/1:17,16:33:99:294,0,355	0/1:23,14:37:99:295,0,437	0/1:31,47:78:99:1017,0,666
1	38218269	rs312824916	1:38218269	10087.4	PASS	GT:AD:DP:GQ:PL	1/1:0,12:12:36:338,36,0	1/1:0,40:40:99:1094,118,0	1/1:0,14:14:42:421,42,0	1/1:0,120:120:99:3240,354,0	1/1:0,38:38:99:1103,113,0	1/1:0,44:44:99:1223,132,0	0/1:37,26:63:99:467,0,897	0/1:44,37:81:99:924,0,944	0/1:66,60:126:99:1322,0,1439
1	38220153	rs739773682	1:38220153	6626.36	PASS	GT:AD:DP:GQ:PL	1/1:0,15:15:44:401,44,0	1/1:0,19:19:57:495,57,0	1/1:0,19:19:57:525,57,0	1/1:0,83:83:99:2103,245,0	1/1:0,24:24:72:654,72,0	1/1:0,27:27:80:765,80,0	0/1:15,16:31:99:355,0,343	0/1:35,19:54:99:313,0,821	0/1:37,52:89:99:1060,0,1500
1	38221875	rs13853732	1:38221875	2195.38	PASS	GT:AD:DP:GQ:PL	0/0:21,0:21:63:0,63,626	0/0:24,0:24:72:0,72,676	0/0:7,0:7:21:0,21,220	0/0:92,0:92:99:0,274,2537	0/0:44,0:44:99:0,131,1180	0/0:29,0:29:87:0,87,888	0/1:16,21:37:99:524,0,374	0/1:32,41:73:99:938,0,763	0/1:29,31:60:99:778,0,689
1	38222677	rs312792426	1:38222677	7392.37	PASS	GT:AD:DP:GQ:PL	1/1:0,14:14:42:391,42,0	1/1:0,25:25:74:695,74,0	1/1:0,11:11:33:266,33,0	1/1:0,65:65:99:1725,192,0	1/1:0,57:57:99:1522,169,0	1/1:0,24:24:71:646,71,0	0/1:12,18:30:99:423,0,235	0/1:38,29:67:99:610,0,901	0/1:42,47:89:99:1159,0,933
1	38222932	rs315589852	1:38222932	11914.4	PASS	GT:AD:DP:GQ:PL	1/1:0,12:12:36:519,36,0	1/1:0,22:22:66:893,66,0	1/1:0,20:20:63:862,63,0	1/1:0,75:75:99:3238,237,0	1/1:0,43:43:99:1827,132,0	1/1:0,24:24:72:972,72,0	0/1:23,16:39:99:532,0,813	0/1:27,30:57:99:991,0,994	0/1:37,52:89:99:2125,0,1312
1	38222953	rs313236582	1:38222953	12882.4	PASS	GT:AD:DP:GQ:PL	1/1:0,20:20:63:768,63,0	1/1:0,21:21:66:920,66,0	1/1:0,21:21:66:891,66,0	1/1:0,92:92:99:3714,279,0	1/1:0,46:46:99:1920,138,0	1/1:0,22:22:69:967,69,0	0/1:20,20:40:99:634,0,789	0/1:29,25:54:99:917,0,1073	0/1:36,57:93:99:2196,0,1266
1	38229784	rs316650440	1:38229784	11508.4	PASS	GT:AD:DP:GQ:PL	1/1:0,32:32:94:788,94,0	1/1:1,40:41:99:1091,105,0	1/1:0,10:10:30:274,30,0	1/1:1,138:139:99:3837,397,0	1/1:0,58:58:99:1639,172,0	1/1:2,63:65:99:1691,103,0	0/1:30,13:43:99:234,0,681	0/1:42,19:61:99:403,0,1023	0/1:73,69:142:99:1596,0,1741
1	40046434	.	1:40046434	7316.65	PASS	GT:AD:DP:GQ:PL	1/1:0,15:15:45:655,45,0	1/1:0,34:34:99:1470,102,0	1/1:0,8:8:24:360,24,0	1/1:0,72:72:99:2972,216,0	1/1:0,20:20:60:839,60,0	1/1:0,15:15:45:645,45,0	1/1:0,2:2:6:90,6,0	1/1:0,3:3:9:105,9,0	1/1:0,5:5:15:205,15,0
1	40082277	rs312981720	1:40082277	45806.4	PASS	GT:AD:DP:GQ:PL	1/1:0,150:150:99:4128,449,0	1/1:0,231:231:99:6421,689,0	1/1:0,70:70:99:1930,210,0	1/1:0,619:619:99:16513,1836,0	1/1:1,269:270:99:7583,780,0	1/1:0,229:229:99:6424,684,0	1/1:0,34:34:99:968,102,0	1/1:0,28:28:84:733,84,0	1/1:0,41:41:99:1131,123,0
1	40123074	rs313727625	1:40123074	34742.4	PASS	GT:AD:DP:GQ:PL	1/1:0,124:124:99:3451,369,0	1/1:2,206:208:99:5600,553,0	1/1:4,88:92:99:2265,114,0	1/1:1,443:444:99:12390,1299,0	1/1:0,184:184:99:5178,548,0	1/1:0,133:133:99:3692,396,0	1/1:1,21:22:28:515,28,0	1/1:0,33:33:99:952,99,0	1/1:0,26:26:78:724,78,0
1	45011065	rs14818043	1:45011065	1937.36	PASS	GT:AD:DP:GQ:PL	0/0:97,0:97:99:0,289,2892	0/0:192,0:192:99:0,573,5395	0/0:56,0:56:99:0,167,1611	0/0:364,1:365:99:0,1041,9794	0/0:172,0:172:99:0,513,5007	0/0:110,0:110:99:0,328,3139	0/1:22,35:57:99:825,0,450	0/1:22,15:37:99:253,0,502	0/1:41,39:80:99:904,0,937
1	45011114	rs312642506	1:45011114	1553.36	PASS	GT:AD:DP:GQ:PL	0/0:71,0:71:99:0,213,2246	0/0:176,0:176:99:0,528,5327	0/0:49,0:49:99:0,146,1475	0/0:395,0:395:99:0,1183,11833	0/0:143,0:143:99:0,428,4476	0/0:117,0:117:99:0,349,3479	0/1:28,28:56:99:571,0,677	0/1:14,15:29:99:290,0,295	0/1:40,34:74:99:737,0,889
1	45022515	rs13859555	1:45022515	855.36	PASS	GT:AD:DP:GQ:PL	0/0:94,0:94:99:0,281,2800	0/0:210,0:210:99:0,626,5955	0/0:69,0:69:99:0,206,2053	0/0:460,0:460:99:0,1365,13162	0/0:174,1:175:99:0,488,5140	0/0:131,0:131:99:0,389,3631	0/1:39,12:51:99:163,0,1065	0/1:29,9:38:99:165,0,730	0/1:45,25:70:99:572,0,1080
1	45024236	rs313140732	1:45024236	1401.36	PASS	GT:AD:DP:GQ:PL	0/0:58,0:58:99:0,172,1597	0/0:107,3:110:99:0,264,2862	0/0:44,0:44:99:0,130,1069	0/0:230,0:230:99:0,675,5692	0/0:102,0:102:99:0,300,2675	0/0:76,1:77:99:0,216,1945	0/1:29,21:50:99:429,0,631	0/1:18,18:36:99:383,0,344	0/1:34,28:62:99:634,0,719
1	47508501	rs737230644	1:47508501	11623.4	PASS	GT:AD:DP:GQ:PL	0/0:352,0:352:99:0,1049,10471	0/0:392,0:392:99:0,1172,11868	0/0:149,1:150:99:0,411,4355	0/0:497,0:497:99:0,1476,15766	0/0:463,1:464:99:0,1346,14344	0/0:316,0:316:99:0,942,9451	0/1:211,134:345:99:2784,0,5607	0/1:148,129:277:99:2900,0,3507	0/1:226,237:463:99:5984,0,5521
1	47510150	rs15257557	1:47510150	105190	PASS	GT:AD:DP:GQ:PL	1/1:0,362:362:99:12121,1083,0	1/1:1,478:479:99:15537,1397,0	1/1:0,175:175:99:5375,520,0	1/1:0,818:818:99:25807,2423,0	1/1:1,565:566:99:18361,1647,0	1/1:0,323:323:99:10724,964,0	0/1:119,178:297:99:4871,0,2824	0/1:123,179:302:99:4993,0,2786	0/1:245,274:519:99:7446,0,6026
1	47514813	rs739950245	1:47514813	12500.4	PASS	GT:AD:DP:GQ:PL	0/0:428,1:429:99:0,1274,13067	0/0:580,0:580:99:0,1732,17416	0/0:165,0:165:99:0,493,4980	0/0:1162,1:1163:99:0,3456,34948	0/0:693,1:694:99:0,2058,21173	0/0:444,0:444:99:0,1327,12578	0/1:208,145:353:99:2797,0,5289	0/1:180,176:356:99:3383,0,4462	0/1:266,297:563:99:6365,0,6560
1	47530544	rs315274545	1:47530544	17090.4	PASS	GT:AD:DP:GQ:PL	0/0:394,0:394:99:0,1186,17431	0/0:367,0:367:99:0,1102,15897	0/0:133,0:133:99:0,408,5949	0/0:649,0:649:99:0,1966,28614	0/0:596,0:596:99:0,1800,26720	0/0:256,0:256:99:0,769,11053	0/1:248,126:374:99:4158,0,9422	0/1:160,151:311:99:5293,0,6206	0/1:227,212:439:99:7684,0,9060
1	47530569	rs312264183	1:47530569	17353.4	PASS	GT:AD:DP:GQ:PL	0/0:367,0:367:99:0,1121,16875	0/0:346,0:346:99:0,1065,15763	0/0:132,0:132:99:0,397,5794	0/0:648,0:648:99:0,1986,28957	0/0:579,0:579:99:0,1771,26598	0/0:223,0:223:99:0,686,10300	0/1:223,131:354:99:4453,0,9043	0/1:148,142:290:99:5284,0,5990	0/1:209,194:403:99:7661,0,8825
1	47531964	rs738728023	1:47531964	6280.36	PASS	GT:AD:DP:GQ:PL	0/0:231,0:231:99:0,691,6862	0/0:219,1:220:99:0,649,6349	0/0:96,0:96:99:0,287,2804	0/0:478,0:478:99:0,1361,13799	0/0:386,0:386:99:0,1153,11470	0/0:130,0:130:99:0,389,3779	0/1:145,96:241:99:1960,0,3607	0/1:90,98:188:99:2099,0,1984	0/1:133,103:236:99:2266,0,3204
1	47546736	rs316104787	1:47546736	174085	PASS	GT:AD:DP:GQ:PL	1/1:0,547:547:99:25050,1692,0	1/1:0,531:531:99:19648,1631,0	1/1:0,188:188:99:7163,572,0	1/1:0,1120:1120:99:39811,3406,0	1/1:0,822:822:99:37942,2570,0	1/1:0,379:379:99:14534,1151,0	0/1:171,246:417:99:10119,0,3526	0/1:173,219:392:99:8348,0,3576	0/1:299,300:599:99:11515,0,6546
1	47552395	rs734538828	1:47552395	12881.4	PASS	GT:AD:DP:GQ:PL	0/0:565,0:565:99:0,1690,17713	0/0:527,0:527:99:0,1592,20112	0/0:180,0:180:99:0,535,5357	0/0:734,0:734:99:0,2221,27155	0/0:660,0:660:99:0,1981,20834	0/0:340,0:340:99:0,1018,10166	0/1:266,141:407:99:2846,0,6620	0/1:156,134:290:99:3224,0,3899	0/1:251,268:519:99:6856,0,6665
1	47559510	rs15257706	1:47559510	9946.36	PASS	GT:AD:DP:GQ:PL	0/0:377,0:377:99:0,1129,12185	0/0:326,0:326:99:0,978,10421	0/0:124,0:124:99:0,369,3812	0/0:621,0:621:99:0,1854,19371	0/0:520,0:520:99:0,1563,17391	0/0:223,0:223:99:0,666,6813	0/1:197,122:319:99:2446,0,5438	0/1:155,117:272:99:2334,0,4018	0/1:254,234:488:99:5211,0,6993
1	57580662	rs735741254	1:57580662	9054.7	PASS	GT:AD:DP:GQ:PL	1/1:0,26:26:78:1158,78,0	1/1:0,54:54:99:2370,162,0	1/1:0,56:56:99:2475,169,0	1/1:0,9:9:27:383,27,0	1/1:0,3:3:9:135,9,0	1/1:0,1:1:3:45,3,0	0/1:11,13:24:99:491,0,412	0/1:23,12:35:99:424,0,904	0/1:39,42:81:99:1617,0,1530
1	57580664	rs736603280	1:57580664	9054.7	PASS	GT:AD:DP:GQ:PL	1/1:0,26:26:78:1158,78,0	1/1:0,53:53:99:2370,162,0	1/1:0,56:56:99:2475,169,0	1/1:0,9:9:27:383,27,0	1/1:0,3:3:9:135,9,0	1/1:0,1:1:3:45,3,0	0/1:11,13:24:99:491,0,412	0/1:23,12:35:99:424,0,904	0/1:40,42:82:99:1617,0,1530
1	57580712	rs733225304	1:57580712	5263.5	PASS	GT:AD:DP:GQ:PL	1/1:0,30:30:89:800,89,0	1/1:0,45:45:99:1164,132,0	1/1:0,54:54:99:1507,161,0	1/1:0,7:7:20:138,20,0	1/1:0,2:2:6:49,6,0	1/1:0,2:2:6:70,6,0	0/1:16,14:30:99:264,0,591	0/1:23,11:34:99:168,0,581	0/1:57,49:106:99:1147,0,1361
1	58393510	rs314463565	1:58393510	8539.36	PASS	GT:AD:DP:GQ:PL	0/0:240,0:240:99:0,716,7139	0/0:572,0:572:99:0,1709,16990	0/0:286,0:286:99:0,855,8273	0/0:841,0:841:99:0,2514,24259	0/0:311,0:311:99:0,927,9022	0/0:293,0:293:99:0,874,8467	0/1:168,109:277:99:2107,0,4023	0/1:196,118:314:99:2316,0,4721	0/1:389,209:598:99:4161,0,9696
1	58393637	rs314761856	1:58393637	81289.4	PASS	GT:AD:DP:GQ:PL	1/1:0,264:264:99:7508,785,0	1/1:0,519:519:99:14679,1551,0	1/1:0,260:260:99:7237,779,0	1/1:0,684:684:99:19641,2048,0	1/1:0,294:294:99:8604,877,0	1/1:0,269:269:99:7870,802,0	0/1:119,132:251:99:3174,0,2737	0/1:126,192:318:99:4524,0,2781	0/1:272,347:619:99:8097,0,6142
1	58394006	rs733568511	1:58394006	44218.3	PASS	GT:AD:DP:GQ:PL	1/1:0,153:153:99:4102,458,0	1/1:3,388:391:99:10200,1097,0	1/1:0,147:147:99:3792,439,0	1/1:2,407:409:99:10444,1176,0	1/1:3,129:132:99:3417,348,0	1/1:1,148:149:99:3832,418,0	0/1:44,97:141:99:1993,0,1186	0/1:61,103:164:99:2115,0,1752	0/1:101,212:313:99:4377,0,1200
1	58394194	rs734167910	1:58394194	55544.4	PASS	GT:AD:DP:GQ:PL	1/1:0,175:175:99:4646,519,0	1/1:0,446:446:99:12120,1325,0	1/1:0,219:219:99:5642,649,0	1/1:0,482:482:99:12568,1421,0	1/1:0,178:178:99:4882,529,0	1/1:0,166:166:99:4582,495,0	0/1:96,99:195:99:2192,0,2062	0/1:122,152:274:99:3387,0,2503	0/1:206,246:452:99:5570,0,4383
1	60490888	rs314309191	1:60490888	304.84	PASS	GT:AD:DP:GQ:PL	0/0:12,0:12:35:0,35,292	0/0:1,0:1:3:0,3,38	0/0:3,0:3:9:0,9,59	0/0:31,0:31:92:0,92,779	0/0:32,0:32:96:0,96,909	0/0:6,0:6:18:0,18,175	0/1:2,6:8:45:137,0,45	0/1:1,2:3:27:40,0,27	0/1:1,8:9:8:171,0,8
1	60492609	rs315561818	1:60492609	2177.93	PASS	GT:AD:DP:GQ:PL	1/1:0,13:13:38:349,38,0	1/1:0,12:12:36:355,36,0	1/1:0,2:2:6:72,6,0	1/1:0,17:17:50:427,50,0	1/1:0,21:21:62:548,62,0	1/1:0,7:7:21:185,21,0	0/1:3,2:5:35:35,0,55	0/1:3,4:7:65:98,0,65	0/1:4,7:11:87:153,0,87
1	64134046	rs316151945	1:64134046	13384.5	PASS	GT:AD:DP:GQ:PL	1/1:0,59:59:99:1658,176,0	1/1:0,62:62:99:1839,185,0	1/1:0,29:29:85:750,85,0	1/1:0,169:169:99:4552,498,0	1/1:1,73:74:99:1941,210,0	1/1:0,50:50:99:1414,149,0	1/1:0,32:32:94:874,94,0	1/1:0,8:8:24:200,24,0	1/1:0,5:5:15:181,15,0
1	64134147	rs316645476	1:64134147	15133.5	PASS	GT:AD:DP:GQ:PL	1/1:0,57:57:99:1848,170,0	1/1:0,71:71:99:2236,212,0	1/1:0,23:23:68:663,68,0	1/1:1,172:173:99:5031,507,0	1/1:0,95:95:99:2968,282,0	1/1:0,43:43:99:1234,127,0	1/1:0,25:25:75:738,75,0	1/1:0,5:5:15:186,15,0	1/1:0,7:7:21:254,21,0
1	64168670	rs314891415	1:64168670	17303.5	PASS	GT:AD:DP:GQ:PL	1/1:0,51:51:99:1549,152,0	1/1:0,63:63:99:1887,189,0	1/1:0,24:24:71:681,71,0	1/1:0,211:211:99:6175,631,0	1/1:0,139:139:99:4112,413,0	1/1:0,55:55:99:1667,164,0	1/1:0,24:24:72:682,72,0	1/1:0,16:16:48:492,48,0	1/1:0,3:3:9:83,9,0
1	64185048	rs317882900	1:64185048	15327.5	PASS	GT:AD:DP:GQ:PL	1/1:0,40:40:99:1147,119,0	1/1:0,71:71:99:2038,212,0	1/1:0,31:31:92:897,92,0	1/1:0,206:206:99:5640,607,0	1/1:0,104:104:99:2901,306,0	1/1:0,55:55:99:1460,163,0	1/1:0,24:24:70:618,70,0	1/1:0,11:11:33:345,33,0	1/1:0,11:11:33:306,33,0
1	68627843	rs315044274	1:68627843	1121.96	PASS	GT:AD:DP:GQ:PL	1/1:0,3:3:9:84,9,0	1/1:0,3:3:9:85,9,0	1/1:0,1:1:3:34,3,0	1/1:0,10:10:29:243,29,0	1/1:0,2:2:6:49,6,0	1/1:0,3:3:9:59,9,0	0/1:3,11:14:53:289,0,53	0/1:2,7:9:63:199,0,63	0/1:1,5:6:27:122,0,27
1	68628335	rs313378720	1:68628335	1992.22	PASS	GT:AD:DP:GQ:PL	1/1:0,4:4:12:129,12,0	1/1:0,12:12:36:373,36,0	1/1:0,1:1:3:37,3,0	1/1:1,14:15:34:366,34,0	1/1:0,5:5:15:134,15,0	1/1:0,2:2:6:49,6,0	0/1:13,13:26:99:332,0,273	0/1:11,8:19:99:163,0,267	0/1:17,16:33:99:452,0,396
1	68628446	rs14841650	1:68628446	2257.17	PASS	GT:AD:DP:GQ:PL	1/1:0,2:2:6:49,6,0	1/1:0,14:14:42:391,42,0	1/1:0,4:4:12:149,12,0	1/1:0,22:22:65:673,65,0	1/1:0,6:6:18:170,18,0	1/1:0,5:5:15:155,15,0	0/1:17,11:28:99:261,0,521	0/1:4,4:8:97:97,0,123	0/1:10,14:24:99:356,0,244
1	78502731	rs80751195	1:78502731	3640.56	PASS	GT:AD:DP:GQ:PL	1/1:0,11:11:33:312,33,0	1/1:0,24:24:71:608,71,0	1/1:0,5:5:15:154,15,0	1/1:0,62:62:99:1552,182,0	1/1:0,11:11:33:324,33,0	1/1:0,13:13:39:353,39,0	1/1:0,6:6:18:171,18,0	1/1:0,3:3:9:107,9,0	1/1:0,4:4:12:84,12,0
1	78511951	rs316689948	1:78511951	2111.9	PASS	GT:AD:DP:GQ:PL	1/1:0,4:4:12:146,12,0	1/1:0,10:10:29:253,29,0	1/1:0,8:8:24:244,24,0	1/1:0,29:29:87:825,87,0	1/1:0,5:5:15:174,15,0	1/1:0,9:9:27:265,27,0	1/1:0,2:2:6:73,6,0	1/1:0,1:1:3:35,3,0	1/1:0,4:4:12:121,12,0
1	79971111	rs317132980	1:79971111	32478.4	PASS	GT:AD:DP:GQ:PL	1/1:0,108:108:99:4900,337,0	1/1:0,112:112:99:5024,346,0	1/1:0,65:65:99:2923,204,0	1/1:0,191:191:99:8449,583,0	1/1:0,103:103:99:4731,328,0	1/1:0,54:54:99:2457,169,0	0/1:19,37:56:99:1545,0,691	0/1:14,24:38:99:917,0,545	0/1:47,41:88:99:1577,0,1814
1	79971118	rs315682012	1:79971118	32989.4	PASS	GT:AD:DP:GQ:PL	1/1:0,115:115:99:4969,346,0	1/1:0,116:116:99:5033,349,0	1/1:0,68:68:99:2923,204,0	1/1:0,198:198:99:8579,600,0	1/1:0,114:114:99:4889,343,0	1/1:0,59:59:99:2531,178,0	0/1:20,40:60:99:1567,0,688	0/1:15,24:39:99:917,0,545	0/1:48,43:91:99:1626,0,1808
1	79971148	rs313421569	1:79971148	23438.4	PASS	GT:AD:DP:GQ:PL	1/1:0,125:125:99:3446,374,0	1/1:1,128:129:99:3436,374,0	1/1:0,83:83:99:2108,247,0	1/1:2,228:230:99:6014,665,0	1/1:0,133:133:99:3642,396,0	1/1:0,71:71:99:1903,210,0	0/1:23,46:69:99:1060,0,377	0/1:16,30:46:99:650,0,268	0/1:49,59:108:99:1224,0,983
1	80010738	rs735345053	1:80010738	16549.4	PASS	GT:AD:DP:GQ:PL	1/1:0,66:66:99:1988,197,0	1/1:0,117:117:99:3492,349,0	1/1:0,33:33:98:963,98,0	1/1:0,145:145:99:4132,431,0	1/1:0,96:96:99:2894,293,0	1/1:0,53:53:99:1604,157,0	0/1:20,25:45:99:598,0,481	0/1:13,8:21:99:167,0,322	0/1:49,36:85:99:756,0,1167
1	80010833	rs313689739	1:80010833	3263.36	PASS	GT:AD:DP:GQ:PL	0/0:67,0:67:99:0,210,2953	0/0:117,0:117:99:0,366,5211	0/0:38,0:38:99:0,117,1678	0/0:162,0:162:99:0,523,7353	0/0:97,0:97:99:0,306,4357	0/0:80,0:80:99:0,246,3526	0/1:27,16:43:99:556,0,993	0/1:12,18:30:99:738,0,464	0/1:32,48:80:99:2014,0,1176
1	80010838	rs317303504	1:80010838	3263.36	PASS	GT:AD:DP:GQ:PL	0/0:66,0:66:99:0,210,2953	0/0:126,0:126:99:0,379,5326	0/0:39,0:39:99:0,120,1703	0/0:175,0:175:99:0,531,7412	0/0:104,0:104:99:0,315,4457	0/0:84,0:84:99:0,252,3581	0/1:25,15:40:99:556,0,993	0/1:13,19:32:99:738,0,464	0/1:33,50:83:99:2014,0,1176
1	80049320	rs317406418	1:80049320	24631.4	PASS	GT:AD:DP:GQ:PL	1/1:0,62:62:99:1783,185,0	1/1:0,154:154:99:4492,458,0	1/1:0,60:60:99:2033,180,0	1/1:0,225:225:99:6224,667,0	1/1:0,124:124:99:3394,366,0	1/1:0,62:62:99:2191,185,0	0/1:54,61:115:99:1382,0,1173	0/1:33,36:69:99:1129,0,757	0/1:53,86:139:99:2048,0,1174
1	80060456	rs14848372	1:80060456	28159.4	PASS	GT:AD:DP:GQ:PL	1/1:0,94:94:99:2677,281,0	1/1:0,130:130:99:3862,389,0	1/1:0,77:77:99:2217,230,0	1/1:0,303:303:99:8372,903,0	1/1:0,135:135:99:3908,405,0	1/1:0,74:74:99:2161,221,0	0/1:49,75:124:99:1775,0,1068	0/1:32,47:79:99:1163,0,610	0/1:57,83:140:99:2069,0,1271
1	80062434	rs314352582	1:80062434	27881.4	PASS	GT:AD:DP:GQ:PL	1/1:0,74:74:99:2122,219,0	1/1:0,170:170:99:4952,507,0	1/1:0,108:108:99:3088,322,0	1/1:0,244:244:99:6880,729,0	1/1:0,131:131:99:3614,389,0	1/1:0,158:158:99:4499,469,0	0/1:44,33:77:99:692,0,1031	0/1:47,32:79:99:625,0,1159	0/1:62,63:125:99:1454,0,2374
1	80067014	rs315989627	1:80067014	37600.4	PASS	GT:AD:DP:GQ:PL	1/1:0,104:104:99:2964,311,0	1/1:0,256:256:99:7287,763,0	1/1:0,126:126:99:3551,373,0	1/1:2,379:381:99:10334,1066,0	1/1:0,156:156:99:4183,461,0	1/1:0,221:221:99:6308,658,0	0/1:67,46:113:99:998,0,1579	0/1:35,26:61:99:514,0,739	0/1:89,71:160:99:1506,0,2106
1	82681059	rs740575022	1:82681059	787.36	PASS	GT:AD:DP:GQ:PL	0/0:21,1:22:56:0,56,601	0/0:44,0:44:99:0,130,1120	0/0:19,0:19:56:0,56,506	0/0:84,0:84:99:0,249,2322	0/0:56,0:56:99:0,166,1527	0/0:76,0:76:99:0,226,2039	0/1:4,4:8:99:122,0,106	0/1:4,4:8:74:125,0,74	0/1:11,21:32:99:585,0,174
1	82688689	rs313287124	1:82688689	5316.37	PASS	GT:AD:DP:GQ:PL	1/1:0,9:9:26:201,26,0	1/1:0,23:23:69:691,69,0	1/1:0,14:14:40:351,40,0	1/1:0,63:63:99:1591,182,0	1/1:2,32:34:51:805,51,0	1/1:0,56:56:99:1512,165,0	0/1:8,4:12:73:73,0,173	0/1:4,2:6:48:48,0,87	0/1:7,4:11:89:89,0,145
1	83510854	rs15328654	1:83510854	19215.4	PASS	GT:AD:DP:GQ:PL	1/1:0,54:54:99:1483,160,0	1/1:0,83:83:99:2707,259,0	1/1:0,40:40:99:1011,117,0	1/1:0,131:131:99:4724,416,0	1/1:0,44:44:99:1206,129,0	1/1:0,49:49:99:1364,146,0	0/1:40,67:107:99:1482,0,905	0/1:36,50:86:99:1042,0,742	0/1:59,100:159:99:4241,0,1266
1	83511175	rs736199167	1:83511175	13416.4	PASS	GT:AD:DP:GQ:PL	1/1:0,21:21:63:678,63,0	1/1:0,53:53:99:1494,158,0	1/1:0,32:32:94:985,94,0	1/1:0,123:123:99:3600,365,0	1/1:0,58:58:99:1540,172,0	1/1:0,44:44:99:1612,137,0	0/1:40,46:86:99:1066,0,776	0/1:25,27:52:99:773,0,537	0/1:39,70:109:99:1713,0,790
1	91188549	rs317253878	1:91188549	17120.4	PASS	GT:AD:DP:GQ:PL	1/1:0,38:38:99:1083,114,0	1/1:0,72:72:99:2071,215,0	1/1:0,42:42:99:1182,125,0	1/1:0,176:176:99:4929,523,0	1/1:0,66:66:99:1822,196,0	1/1:0,88:88:99:2509,263,0	0/1:55,43:98:99:1022,0,1311	0/1:42,44:86:99:1006,0,911	0/1:76,68:144:99:1541,0,1799
1	91189490	rs15346539	1:91189490	3639.36	PASS	GT:AD:DP:GQ:PL	0/0:33,0:33:99:0,99,1000	0/0:88,0:88:99:0,263,2737	0/0:22,0:22:66:0,66,674	0/0:179,0:179:99:0,531,5411	0/0:67,0:67:99:0,200,2071	0/0:70,0:70:99:0,209,2156	0/1:46,39:85:99:1026,0,1166	0/1:39,41:80:99:1070,0,1044	0/1:68,61:129:99:1588,0,1658
1	91189856	rs313090144	1:91189856	16498.4	PASS	GT:AD:DP:GQ:PL	1/1:0,29:29:86:877,86,0	1/1:0,72:72:99:2206,214,0	1/1:0,19:19:56:481,56,0	1/1:0,190:190:99:5810,564,0	1/1:0,58:58:99:1896,173,0	1/1:0,69:69:99:2031,204,0	0/1:48,26:74:99:672,0,1198	0/1:41,34:75:99:892,0,907	0/1:70,65:135:99:1678,0,1666
1	91195013	rs313611067	1:91195013	11837.4	PASS	GT:AD:DP:GQ:PL	1/1:0,30:30:89:782,89,0	1/1:0,45:45:99:1131,134,0	1/1:0,25:25:74:635,74,0	1/1:0,161:161:99:4180,479,0	1/1:0,42:42:99:1146,125,0	1/1:0,71:71:99:1912,212,0	0/1:41,33:74:99:704,0,819	0/1:38,21:59:99:449,0,864	0/1:51,48:99:99:943,0,1102
1	97411572	rs315818308	1:97411572	239.67	PASS	GT:AD:DP:GQ:PL	0/0:12,0:12:36:0,36,353	0/0:27,0:27:81:0,81,765	0/0:14,0:14:42:0,42,360	0/0:13,0:13:39:0,39,377	0/0:3,0:3:9:0,9,109	0/0:9,0:9:27:0,27,259	0/1:15,2:17:29:29,0,378	0/1:10,6:16:99:122,0,168	0/1:10,7:17:99:133,0,245
1	97411907	rs13688161	1:97411907	2421.82	PASS	GT:AD:DP:GQ:PL	1/1:0,8:8:24:215,24,0	1/1:0,25:25:73:642,73,0	1/1:0,7:7:21:230,21,0	1/1:0,16:16:48:478,48,0	1/1:0,4:4:12:119,12,0	1/1:0,3:3:9:76,9,0	0/1:5,10:15:99:258,0,115	0/1:4,5:9:99:136,0,153	0/1:8,14:22:99:312,0,286
1	107374854	rs737702060	1:107374854	2915.36	PASS	GT:AD:DP:GQ:PL	0/0:100,0:100:99:0,298,2845	0/0:172,1:173:99:0,505,4789	0/0:89,0:89:99:0,267,2425	0/0:252,0:252:99:0,747,7116	0/0:166,0:166:99:0,496,4686	0/0:123,0:123:99:0,365,3430	0/1:74,45:119:99:693,0,1598	0/1:63,26:89:99:352,0,1481	0/1:142,103:245:99:1915,0,3121
1	107374983	rs312466656	1:107374983	5579.36	PASS	GT:AD:DP:GQ:PL	0/0:103,0:103:99:0,305,2903	0/0:260,0:260:99:0,776,7582	0/0:113,0:113:99:0,336,3152	0/0:423,0:423:99:0,1254,11505	0/0:220,0:220:99:0,657,6299	0/0:196,0:196:99:0,588,5570	0/1:100,50:150:99:998,0,2391	0/1:72,67:139:99:1260,0,1824	0/1:145,149:294:99:3366,0,3373
1	107375011	rs734645353	1:107375011	10912.4	PASS	GT:AD:DP:GQ:PL	0/0:128,0:128:99:0,403,6030	0/0:315,0:315:99:0,972,14392	0/0:133,0:133:99:0,415,6191	0/0:504,0:504:99:0,1610,23899	0/0:259,0:259:99:0,819,12167	0/0:238,0:238:99:0,771,11483	0/1:117,65:182:99:2162,0,5066	0/1:82,78:160:99:2880,0,3585	0/1:159,160:319:99:5915,0,6410
1	107375138	rs317094938	1:107375138	11875.4	PASS	GT:AD:DP:GQ:PL	0/0:159,0:159:99:0,484,6981	0/0:278,0:278:99:0,840,12169	0/0:157,0:157:99:0,478,6970	0/0:640,1:641:99:0,1924,27983	0/0:326,0:326:99:0,987,14216	0/0:249,0:249:99:0,758,10965	0/1:176,98:274:99:3533,0,6880	0/1:144,62:206:99:2093,0,5679	0/1:178,165:343:99:6294,0,6817
1	107375143	rs10730720	1:107375143	11851.4	PASS	GT:AD:DP:GQ:PL	0/0:157,0:157:99:0,472,6897	0/0:270,0:270:99:0,819,11998	0/0:159,0:159:99:0,484,7032	0/0:643,0:643:99:0,1947,27995	0/0:317,0:317:99:0,969,14084	0/0:247,0:247:99:0,752,10926	0/1:174,96:270:99:3477,0,6895	0/1:142,60:202:99:2100,0,5698	0/1:177,161:338:99:6319,0,6893
1	107375325	rs313695946	1:107375325	3685.36	PASS	GT:AD:DP:GQ:PL	0/0:80,0:80:99:0,238,2482	0/0:155,0:155:99:0,461,4585	0/0:81,0:81:99:0,243,2677	0/0:287,0:287:99:0,850,8608	0/0:130,0:130:99:0,386,4051	0/0:80,2:82:99:0,194,2461	0/1:62,53:115:99:1217,0,1455	0/1:63,32:95:99:705,0,1595	0/1:95,82:177:99:1808,0,2318
1	107375537	rs313159361	1:107375537	2518.36	PASS	GT:AD:DP:GQ:PL	0/0:68,0:68:99:0,203,1842	0/0:103,0:103:99:0,305,2661	0/0:48,0:48:99:0,143,1317	0/0:178,0:178:99:0,524,4556	0/0:84,0:84:99:0,250,2195	0/0:88,0:88:99:0,261,2259	0/1:73,34:107:99:553,0,1663	0/1:38,36:74:99:706,0,846	0/1:76,61:137:99:1304,0,1656
1	107385850	rs14871477	1:107385850	522.44	PASS	GT:AD:DP:GQ:PL	0/0:11,0:11:33:0,33,318	0/0:11,0:11:33:0,33,354	0/0:5,0:5:15:0,15,137	0/0:44,0:44:99:0,130,1360	0/0:21,0:21:63:0,63,603	0/0:12,0:12:36:0,36,385	0/1:4,7:11:67:145,0,67	0/1:7,5:12:82:82,0,168	0/1:7,13:20:99:340,0,142
1	107385865	rs14871478	1:107385865	529.51	PASS	GT:AD:DP:GQ:PL	0/0:12,0:12:35:0,35,286	0/0:11,0:11:33:0,33,348	0/0:4,0:4:12:0,12,120	0/0:47,0:47:99:0,138,1351	0/0:22,0:22:65:0,65,600	0/0:14,0:14:42:0,42,408	0/1:4,7:11:51:194,0,51	0/1:9,3:12:85:85,0,197	0/1:8,13:21:99:295,0,159
1	107386264	rs15378009	1:107386264	606.37	PASS	GT:AD:DP:GQ:PL	0/0:16,0:16:47:0,47,407	0/0:19,0:19:57:0,57,559	0/0:10,0:10:29:0,29,266	0/0:62,0:62:99:0,184,1721	0/0:25,0:25:74:0,74,668	0/0:25,0:25:74:0,74,684	0/1:5,7:12:98:215,0,98	0/1:2,7:9:46:202,0,46	0/1:15,9:24:99:234,0,361
1	122393000	rs317238805	1:122393000	453.36	PASS	GT:AD:DP:GQ:PL	0/0:55,0:55:99:0,162,1539	0/0:95,0:95:99:0,283,2730	0/0:38,0:38:99:0,113,1081	0/0:187,0:187:99:0,555,5207	0/0:129,0:129:99:0,380,3474	0/0:64,0:64:99:0,190,1819	0/1:15,6:21:99:137,0,348	0/1:26,7:33:99:131,0,728	0/1:23,11:34:99:230,0,579
1	122393860	rs15411489	1:122393860	385.62	PASS	GT:AD:DP:GQ:PL	0/0:64,0:64:99:0,188,1631	0/0:88,0:88:99:0,261,2491	0/0:43,0:43:99:0,128,1103	0/0:146,0:146:99:0,431,3869	0/0:125,0:125:99:0,369,3379	0/0:58,0:58:99:0,172,1637	0/1:21,2:23:9:9,0,518	0/1:12,6:18:99:161,0,330	0/1:24,12:36:99:259,0,583
1	122396255	rs318179770	1:122396255	37409.4	PASS	GT:AD:DP:GQ:PL	1/1:0,99:99:99:3054,296,0	1/1:0,153:153:99:4702,455,0	1/1:0,82:82:99:2394,245,0	1/1:0,510:510:99:14134,1514,0	1/1:0,199:199:99:5784,593,0	1/1:0,180:180:99:5168,537,0	0/1:10,37:47:99:962,0,155	0/1:7,21:28:99:589,0,122	0/1:27,28:55:99:667,0,621
1	122403017	rs317315962	1:122403017	35387.4	PASS	GT:AD:DP:GQ:PL	1/1:0,98:98:99:3082,293,0	1/1:2,168:170:99:4869,492,0	1/1:0,60:60:99:1844,180,0	1/1:2,440:442:99:12610,1290,0	1/1:0,183:183:99:5673,548,0	1/1:0,161:161:99:4891,482,0	0/1:5,26:31:61:692,0,61	0/1:8,26:34:99:719,0,162	0/1:23,39:62:99:1052,0,510
1	122409425	rs318197575	1:122409425	29844.4	PASS	GT:AD:DP:GQ:PL	1/1:0,88:88:99:2673,263,0	1/1:0,116:116:99:3486,346,0	1/1:0,78:78:99:2459,237,0	1/1:0,319:319:99:9885,955,0	1/1:0,137:137:99:4195,410,0	1/1:0,157:157:99:5038,471,0	0/1:12,32:44:99:920,0,205	0/1:4,23:27:37:570,0,37	0/1:5,25:30:46:663,0,46
1	128397044	rs314737931	1:128397044	102296	PASS	GT:AD:DP:GQ:PL	1/1:0,239:239:99:6544,716,0	1/1:1,574:575:99:15703,1692,0	1/1:0,204:204:99:5505,610,0	1/1:2,1296:1298:99:35647,3821,0	1/1:0,545:545:99:15193,1637,0	1/1:0,574:574:99:16225,1720,0	0/1:107,131:238:99:2827,0,2136	0/1:78,96:174:99:2081,0,1505	0/1:98,120:218:99:2616,0,1943
1	128398190	rs317183097	1:128398190	136478	PASS	GT:AD:DP:GQ:PL	1/1:0,358:358:99:11082,1075,0	1/1:1,580:581:99:17240,1732,0	1/1:0,266:266:99:7684,795,0	1/1:1,1393:1394:99:41581,4171,0	1/1:0,746:746:99:22417,2228,0	1/1:0,649:649:99:19044,1937,0	0/1:166,280:446:99:7267,0,3504	0/1:135,217:352:99:5326,0,2836	0/1:212,209:421:99:4882,0,5103
1	128398620	rs14886284	1:128398620	101372	PASS	GT:AD:DP:GQ:PL	1/1:0,334:334:99:9897,997,0	1/1:1,479:480:99:14158,1423,0	1/1:0,205:205:99:5886,615,0	1/1:0,1022:1022:99:29007,3046,0	1/1:2,569:571:99:16524,1628,0	1/1:0,397:397:99:11568,1186,0	0/1:190,223:413:99:5042,0,3997	0/1:126,186:312:99:4325,0,2440	0/1:175,206:381:99:5010,0,3785
1	128403886	rs10726100	1:128403886	125968	PASS	GT:AD:DP:GQ:PL	1/1:0,288:288:99:8529,862,0	1/1:0,595:595:99:17616,1786,0	1/1:0,193:193:99:5556,580,0	1/1:2,1505:1507:99:43426,4459,0	1/1:0,658:658:99:18926,1968,0	1/1:0,606:606:99:17653,1814,0	0/1:157,246:403:99:6112,0,3043	0/1:125,167:292:99:3852,0,2531	0/1:176,183:359:99:4343,0,3868
1	128512170	rs735874809	1:128512170	86130.4	PASS	GT:AD:DP:GQ:PL	1/1:0,133:133:99:6049,406,0	1/1:0,218:218:99:10250,689,0	1/1:1,118:119:99:5079,333,0	1/1:0,285:285:99:13067,881,0	1/1:0,146:146:99:6768,454,0	1/1:0,152:152:99:6629,468,0	0/1:232,266:498:99:10770,0,8459	0/1:226,255:481:99:9117,0,8501	0/1:403,461:864:99:18446,0,14613
1	128512189	rs316791646	1:128512189	82644.4	PASS	GT:AD:DP:GQ:PL	1/1:0,124:124:99:5545,384,0	1/1:0,219:219:99:9923,677,0	1/1:0,118:118:99:5266,376,0	1/1:1,267:268:99:12172,829,0	1/1:0,147:147:99:6719,460,0	1/1:0,149:149:99:6350,459,0	0/1:250,253:503:99:9926,0,9040	0/1:251,252:503:99:9216,0,9050	0/1:431,444:875:99:17572,0,15677
1	129304889	rs314852122	1:129304889	1297.36	PASS	GT:AD:DP:GQ:PL	0/0:75,0:75:99:0,221,2225	0/0:136,0:136:99:0,407,4141	0/0:56,0:56:99:0,167,1586	0/0:252,0:252:99:0,755,7893	0/0:144,0:144:99:0,430,4335	0/0:75,0:75:99:0,224,2238	0/1:47,25:72:99:427,0,1245	0/1:42,18:60:99:305,0,1083	0/1:35,31:66:99:610,0,916
1	129305063	rs317730840	1:129305063	5703.36	PASS	GT:AD:DP:GQ:PL	0/0:260,0:260:99:0,774,7283	0/0:393,0:393:99:0,1173,10890	0/0:155,0:155:99:0,462,4296	0/0:959,0:959:99:0,2842,25767	0/0:484,0:484:99:0,1437,13121	0/0:335,0:335:99:0,996,9120	0/1:140,87:227:99:1705,0,3227	0/1:111,84:195:99:1625,0,2570	0/1:137,105:242:99:2418,0,3249
1	129305254	rs315059412	1:129305254	5208.36	PASS	GT:AD:DP:GQ:PL	0/0:233,0:233:99:0,688,6595	0/0:319,0:319:99:0,951,9279	0/0:154,0:154:99:0,458,4353	0/0:847,1:848:99:0,2500,23501	0/0:383,0:383:99:0,1145,11013	0/0:312,0:312:99:0,925,8848	0/1:150,69:219:99:1421,0,3772	0/1:94,57:151:99:1278,0,2217	0/1:128,105:233:99:2554,0,3033
1	129305286	rs313387967	1:129305286	4533.36	PASS	GT:AD:DP:GQ:PL	0/0:213,1:214:99:0,612,6531	0/0:320,0:320:99:0,956,9575	0/0:138,0:138:99:0,411,4250	0/0:773,1:774:99:0,2274,22310	0/0:381,0:381:99:0,1137,11762	0/0:300,0:300:99:0,892,9023	0/1:149,61:210:99:1192,0,3785	0/1:93,60:153:99:1312,0,2397	0/1:119,95:214:99:2074,0,2916
1	142008803	rs10727990	1:142008803	40631.4	PASS	GT:AD:DP:GQ:PL	1/1:0,91:91:99:2762,273,0	1/1:0,202:202:99:6143,604,0	1/1:0,97:97:99:2946,291,0	1/1:0,510:510:99:15626,1525,0	1/1:0,170:170:99:5294,508,0	1/1:0,164:164:99:5023,490,0	0/1:6,48:54:37:1326,0,37	0/1:8,18:26:99:454,0,114	0/1:20,42:62:99:1102,0,403
1	142017516	rs316219741	1:142017516	32630.4	PASS	GT:AD:DP:GQ:PL	1/1:0,97:97:99:2743,288,0	1/1:0,201:201:99:5844,601,0	1/1:0,55:55:99:1516,162,0	1/1:2,411:413:99:11047,1175,0	1/1:0,194:194:99:5740,580,0	1/1:0,133:133:99:3580,396,0	0/1:16,29:45:99:693,0,360	0/1:6,32:38:60:725,0,60	0/1:20,32:52:99:787,0,374
1	143196823	rs13711972	1:143196823	7127.51	PASS	GT:AD:DP:GQ:PL	1/1:0,28:28:82:729,82,0	1/1:0,63:63:99:1744,186,0	1/1:0,23:23:68:628,68,0	1/1:0,43:43:99:1221,126,0	1/1:0,16:16:48:465,48,0	1/1:0,4:4:12:106,12,0	0/1:23,22:45:99:474,0,890	0/1:17,17:34:99:380,0,663	0/1:68,67:135:99:1425,0,1475
1	143196864	rs13711973	1:143196864	15164.4	PASS	GT:AD:DP:GQ:PL	1/1:0,24:24:78:1159,78,0	1/1:0,76:76:99:3465,232,0	1/1:0,27:27:81:1215,81,0	1/1:0,59:59:99:2745,184,0	1/1:0,21:21:66:979,66,0	1/1:0,9:9:27:405,27,0	0/1:25,21:46:99:807,0,987	0/1:23,22:45:99:875,0,897	0/1:73,90:163:99:3559,0,2784
1	143196865	rs13711974	1:143196865	15299.4	PASS	GT:AD:DP:GQ:PL	1/1:0,24:24:81:1204,81,0	1/1:0,76:76:99:3465,232,0	1/1:0,27:27:84:1260,84,0	1/1:0,59:59:99:2745,184,0	1/1:0,21:21:69:1024,69,0	1/1:0,9:9:27:405,27,0	0/1:25,21:46:99:807,0,987	0/1:23,22:45:99:875,0,897	0/1:73,90:163:99:3559,0,2784
1	143196883	rs14899022	1:143196883	14300.4	PASS	GT:AD:DP:GQ:PL	1/1:0,23:23:60:1151,60,0	1/1:0,63:63:99:3081,214,0	1/1:0,27:27:84:1243,84,0	1/1:0,64:64:99:2926,199,0	1/1:0,20:20:72:1029,72,0	1/1:0,12:12:36:528,36,0	0/1:27,17:44:99:664,0,1122	0/1:30,16:46:99:708,0,1189	0/1:84,72:156:99:3015,0,3305
1	143196884	rs15451372	1:143196884	14303.4	PASS	GT:AD:DP:GQ:PL	1/1:0,23:23:60:1151,60,0	1/1:0,62:62:99:3081,214,0	1/1:0,27:27:84:1243,84,0	1/1:0,64:64:99:2926,199,0	1/1:0,20:20:72:1029,72,0	1/1:0,12:12:36:528,36,0	0/1:26,17:43:99:667,0,1080	0/1:30,16:46:99:708,0,1189	0/1:84,71:155:99:3015,0,3305
1	167631442	rs313134954	1:167631442	8046.36	PASS	GT:AD:DP:GQ:PL	0/0:151,0:151:99:0,457,6750	0/0:235,0:235:99:0,707,10493	0/0:106,0:106:99:0,319,4732	0/0:352,0:352:99:0,1059,15496	0/0:265,0:265:99:0,798,11855	0/0:195,0:195:99:0,587,8602	0/1:124,59:183:99:2022,0,4979	0/1:68,35:103:99:1176,0,2691	0/1:110,124:234:99:4893,0,4202
1	167631445	rs317908093	1:167631445	8046.36	PASS	GT:AD:DP:GQ:PL	0/0:150,0:150:99:0,452,6716	0/0:233,0:233:99:0,704,10460	0/0:106,0:106:99:0,319,4732	0/0:350,0:350:99:0,1059,15496	0/0:265,0:265:99:0,798,11855	0/0:193,0:193:99:0,587,8602	0/1:123,58:181:99:2022,0,4979	0/1:68,34:102:99:1176,0,2691	0/1:111,130:241:99:4893,0,4202
1	173785324	rs735306735	1:173785324	1366.85	PASS	GT:AD:DP:GQ:PL	0/0:6,0:6:18:0,18,170	0/0:33,0:33:99:0,99,994	0/0:23,0:23:69:0,69,626	0/0:7,0:7:21:0,21,182	0/0:4,0:4:12:0,12,99	0/0:3,0:3:9:0,9,85	0/1:27,22:49:99:504,0,614	0/1:19,8:27:99:155,0,446	0/1:43,37:80:99:752,0,873
1	173785795	rs314592906	1:173785795	786.87	PASS	GT:AD:DP:GQ:PL	0/0:7,0:7:21:0,21,185	0/0:18,0:18:54:0,54,533	0/0:10,0:10:30:0,30,290	0/0:4,0:4:12:0,12,112	0/0:1,0:1:3:0,3,36	0/0:3,0:3:9:0,9,83	0/1:7,22:29:99:499,0,139	0/1:17,6:23:79:79,0,440	0/1:23,13:36:99:252,0,538
1	176362085	rs13980999	1:176362085	5062.36	PASS	GT:AD:DP:GQ:PL	0/0:49,0:49:99:0,147,1461	0/0:91,0:91:99:0,270,2505	0/0:38,0:38:99:0,114,1100	0/0:144,3:147:99:0,365,3925	0/0:70,0:70:99:0,209,2015	0/0:19,0:19:57:0,57,580	0/1:75,75:150:99:1602,0,1848	0/1:51,54:105:99:1113,0,1269	0/1:104,115:219:99:2392,0,2370
1	176362325	rs735111761	1:176362325	30078.4	PASS	GT:AD:DP:GQ:PL	1/1:0,44:44:99:1325,131,0	1/1:0,176:176:99:7824,544,0	1/1:0,48:48:99:1409,143,0	1/1:0,148:148:99:6398,460,0	1/1:0,51:51:99:1695,156,0	1/1:0,30:30:90:1008,90,0	0/1:111,94:205:99:2178,0,2781	0/1:94,91:185:99:2128,0,2362	0/1:127,162:289:99:6158,0,2717
1	177846219	rs732299779	1:177846219	128.68	PASS	GT:AD:DP:GQ:PL	0/0:2,0:2:6:0,6,49	0/0:9,0:9:27:0,27,271	0/0:5,0:5:15:0,15,136	0/0:6,0:6:18:0,18,133	0/0:5,0:5:15:0,15,139	0/0:2,0:2:6:0,6,49	0/1:2,3:5:46:93,0,46	0/1:3,2:5:34:34,0,64	0/1:11,3:14:45:45,0,297
1	177846356	rs15521566	1:177846356	191.7	PASS	GT:AD:DP:GQ:PL	0/0:7,0:7:21:0,21,171	0/0:12,0:12:36:0,36,340	0/0:11,0:11:33:0,33,301	0/0:7,0:7:21:0,21,158	0/0:8,0:8:23:0,23,179	0/0:3,0:3:9:0,9,108	0/1:5,3:8:87:87,0,159	0/1:6,2:8:38:38,0,148	0/1:20,7:27:99:111,0,544
1	177849593	rs316601253	1:177849593	51015.4	PASS	GT:AD:DP:GQ:PL	1/1:0,92:92:99:2891,276,0	1/1:2,176:178:99:5155,497,0	1/1:0,92:92:99:2828,276,0	1/1:0,478:478:99:14186,1411,0	1/1:1,164:165:99:5086,477,0	1/1:0,189:189:99:5900,565,0	0/1:172,185:357:99:4447,0,4281	0/1:162,163:325:99:4191,0,3987	0/1:287,264:551:99:6376,0,7259
1	177850496	rs315137189	1:177850496	13563.4	PASS	GT:AD:DP:GQ:PL	0/0:98,0:98:99:0,292,2716	0/0:196,0:196:99:0,583,5562	0/0:109,0:109:99:0,323,2957	0/0:505,0:505:99:0,1500,14410	0/0:193,0:193:99:0,573,5384	0/0:215,1:216:99:0,631,5909	0/1:235,206:441:99:4097,0,5327	0/1:190,146:336:99:3139,0,4062	0/1:259,278:537:99:6372,0,6243
1	177851779	rs316653410	1:177851779	62322.4	PASS	GT:AD:DP:GQ:PL	1/1:0,116:116:99:3298,346,0	1/1:0,254:254:99:7107,759,0	1/1:0,123:123:99:3428,367,0	1/1:1,570:571:99:16239,1694,0	1/1:0,260:260:99:7371,769,0	1/1:0,230:230:99:6729,690,0	0/1:245,224:469:99:5013,0,5122	0/1:205,197:402:99:4359,0,4203	0/1:374,379:753:99:8823,0,8308
1	177851883	rs314878191	1:177851883	13071.4	PASS	GT:AD:DP:GQ:PL	0/0:98,0:98:99:0,290,2871	0/0:156,1:157:99:0,458,4734	0/0:73,0:73:99:0,217,2149	0/0:307,0:307:99:0,906,8940	0/0:199,0:199:99:0,587,5646	0/0:147,0:147:99:0,435,4201	0/1:162,194:356:99:4130,0,3579	0/1:178,135:313:99:2579,0,4005	0/1:310,296:606:99:6407,0,7432
1	177851965	rs316921843	1:177851965	12698.4	PASS	GT:AD:DP:GQ:PL	0/0:124,0:124:99:0,369,3640	0/0:184,0:184:99:0,548,5409	0/0:68,0:68:99:0,200,1892	0/0:408,0:408:99:0,1211,11626	0/0:208,0:208:99:0,614,5882	0/0:152,0:152:99:0,453,4398	0/1:198,157:355:99:3366,0,4653	0/1:174,133:307:99:2927,0,4023	0/1:291,288:579:99:6450,0,6871
1	177852038	rs313968018	1:177852038	59228.4	PASS	GT:AD:DP:GQ:PL	1/1:0,171:171:99:4533,505,0	1/1:0,233:233:99:6378,699,0	1/1:0,83:83:99:2271,248,0	1/1:0,591:591:99:15886,1753,0	1/1:0,262:262:99:7232,778,0	1/1:0,202:202:99:5425,599,0	0/1:213,261:474:99:5437,0,4832	0/1:192,214:406:99:4777,0,4295	0/1:360,339:699:99:7334,0,8238
1	177857773	rs731898911	1:177857773	9163.36	PASS	GT:AD:DP:GQ:PL	0/0:101,0:101:99:0,299,2749	0/0:224,0:224:99:0,662,5919	0/0:86,0:86:99:0,252,2196	0/0:508,2:510:99:0,1472,14168	0/0:174,0:174:99:0,518,4822	0/0:185,0:185:99:0,547,5023	0/1:178,114:292:99:2605,0,3715	0/1:143,106:249:99:2337,0,2966	0/1:219,176:395:99:4266,0,4703
1	179509959	rs317752504	1:179509959	5412.36	PASS	GT:AD:DP:GQ:PL	1/1:0,15:15:45:445,45,0	1/1:0,39:39:99:1154,117,0	1/1:0,23:23:68:610,68,0	1/1:0,30:30:87:868,87,0	1/1:0,12:12:36:339,36,0	1/1:0,13:13:39:440,39,0	0/1:14,27:41:99:581,0,305	0/1:17,17:34:99:372,0,359	0/1:19,27:46:99:648,0,457
1	179510115	rs314886380	1:179510115	6289.36	PASS	GT:AD:DP:GQ:PL	1/1:0,17:17:51:500,51,0	1/1:0,45:45:99:1272,135,0	1/1:0,28:28:84:800,84,0	1/1:0,34:34:99:1155,102,0	1/1:0,13:13:39:386,39,0	1/1:0,18:18:54:609,54,0	0/1:15,26:41:99:631,0,285	0/1:19,17:36:99:369,0,469	0/1:23,21:44:99:612,0,559
1	179511225	rs316748171	1:179511225	7250.36	PASS	GT:AD:DP:GQ:PL	1/1:0,27:27:81:860,81,0	1/1:0,43:43:99:1272,129,0	1/1:0,29:29:86:804,86,0	1/1:0,42:42:99:1361,126,0	1/1:0,19:19:57:554,57,0	1/1:0,25:25:78:839,78,0	0/1:24,20:44:99:500,0,594	0/1:9,17:26:99:432,0,209	0/1:30,28:58:99:673,0,786
1	179538911	rs315600243	1:179538911	747.36	PASS	GT:AD:DP:GQ:PL	0/0:31,0:31:91:0,91,847	0/0:73,0:73:99:0,218,2075	0/0:34,0:34:99:0,101,926	0/0:81,0:81:99:0,240,2245	0/0:22,0:22:66:0,66,588	0/0:39,0:39:99:0,120,1151	0/1:34,16:50:99:324,0,776	0/1:15,7:22:99:126,0,361	0/1:32,17:49:99:342,0,746
2	486533	rs15052338	2:486533	13421.4	PASS	GT:AD:DP:GQ:PL	1/1:0,28:28:84:848,84,0	1/1:0,100:100:99:2718,298,0	1/1:0,55:55:99:1524,163,0	1/1:0,73:73:99:2078,215,0	1/1:0,19:19:56:575,56,0	1/1:0,26:26:78:734,78,0	0/1:88,72:160:99:1654,0,1966	0/1:66,59:125:99:1247,0,1408	0/1:89,91:180:99:2088,0,2079
2	490034	rs15052343	2:490034	7033.37	PASS	GT:AD:DP:GQ:PL	1/1:0,24:24:71:640,71,0	1/1:0,36:36:99:982,107,0	1/1:0,11:11:32:297,32,0	1/1:0,32:32:95:915,95,0	1/1:0,20:20:58:471,58,0	1/1:0,9:9:26:208,26,0	0/1:50,57:107:99:1188,0,981	0/1:42,42:84:99:940,0,929	0/1:85,66:151:99:1437,0,1937
2	490970	rs14126138	2:490970	9867.36	PASS	GT:AD:DP:GQ:PL	1/1:0,25:25:74:679,74,0	1/1:0,58:58:99:1575,173,0	1/1:0,29:29:87:804,87,0	1/1:0,75:75:99:2028,222,0	1/1:0,13:13:39:420,39,0	1/1:0,30:30:89:816,89,0	0/1:42,55:97:99:1224,0,927	0/1:48,27:75:99:558,0,1196	0/1:84,84:168:99:1808,0,1940
2	499469	rs736563178	2:499469	6189.37	PASS	GT:AD:DP:GQ:PL	1/1:0,25:25:75:976,75,0	1/1:0,31:31:93:1289,93,0	1/1:0,10:10:30:326,30,0	1/1:0,45:45:99:1846,135,0	1/1:0,15:15:45:612,45,0	1/1:0,19:19:57:741,57,0	0/1:4,3:7:99:114,0,100	0/1:5,8:13:95:180,0,95	0/1:6,4:10:99:150,0,118
2	499633	rs740507470	2:499633	4799.37	PASS	GT:AD:DP:GQ:PL	1/1:0,14:14:42:475,42,0	1/1:0,27:27:81:822,81,0	1/1:0,15:15:45:445,45,0	1/1:0,46:46:99:1358,137,0	1/1:0,21:21:63:668,63,0	1/1:0,27:27:81:751,81,0	0/1:8,5:13:97:97,0,195	0/1:3,1:4:24:24,0,62	0/1:3,7:10:39:204,0,39
2	501233	rs313952529	2:501233	438.36	PASS	GT:AD:DP:GQ:PL	0/0:24,0:24:70:0,70,648	0/0:47,0:47:99:0,138,1249	0/0:32,0:32:95:0,95,876	0/0:71,0:71:99:0,209,1908	0/0:56,0:56:99:0,166,1694	0/0:54,0:54:99:0,159,1591	0/1:17,7:24:99:145,0,448	0/1:6,6:12:99:171,0,144	0/1:12,8:20:99:167,0,206
2	8515000	rs737860772	2:8515000	8832.36	PASS	GT:AD:DP:GQ:PL	1/1:0,19:19:56:511,56,0	1/1:0,46:46:99:1223,137,0	1/1:0,22:22:65:558,65,0	1/1:0,69:69:99:1855,216,0	1/1:0,38:38:99:1005,115,0	1/1:0,47:47:99:1270,140,0	0/1:37,38:75:99:815,0,744	0/1:16,31:47:99:699,0,287	0/1:32,42:74:99:941,0,679
2	8515074	rs314044670	2:8515074	18343.4	PASS	GT:AD:DP:GQ:PL	1/1:0,34:34:99:1487,102,0	1/1:0,43:43:99:1827,132,0	1/1:0,31:31:96:1346,96,0	1/1:0,104:104:99:4464,325,0	1/1:0,57:57:99:2476,175,0	1/1:0,47:47:99:2028,152,0	0/1:43,43:86:99:1529,0,1536	0/1:20,27:47:99:960,0,719	0/1:45,60:105:99:2271,0,1694
2	8515083	rs312534804	2:8515083	17992.4	PASS	GT:AD:DP:GQ:PL	1/1:0,35:35:99:1521,105,0	1/1:0,43:43:99:1834,135,0	1/1:0,30:30:90:1297,90,0	1/1:1,102:103:99:4413,315,0	1/1:0,54:54:99:2376,165,0	1/1:0,46:46:99:1965,146,0	0/1:40,39:79:99:1514,0,1480	0/1:19,24:43:99:908,0,691	0/1:43,55:98:99:2209,0,1658
2	8515225	rs735671391	2:8515225	13921.4	PASS	GT:AD:DP:GQ:PL	1/1:0,25:25:75:685,75,0	1/1:0,58:58:99:1382,169,0	1/1:0,39:39:99:956,115,0	1/1:0,177:177:99:4124,510,0	1/1:0,80:80:99:2063,235,0	1/1:0,75:75:99:2064,222,0	0/1:41,59:100:99:1141,0,837	0/1:26,34:60:99:736,0,600	0/1:50,46:96:99:815,0,1055
2	8515375	rs313715466	2:8515375	10032.4	PASS	GT:AD:DP:GQ:PL	1/1:0,32:32:95:882,95,0	1/1:0,30:30:90:909,90,0	1/1:0,24:24:71:706,71,0	1/1:0,92:92:99:2606,273,0	1/1:0,38:38:99:1157,114,0	1/1:0,58:58:99:1683,174,0	0/1:41,23:64:99:523,0,971	0/1:26,29:55:99:700,0,504	0/1:65,41:106:99:911,0,1559
2	8516247	rs15883845	2:8516247	18677.4	PASS	GT:AD:DP:GQ:PL	1/1:0,62:62:99:1871,184,0	1/1:0,60:60:99:2039,180,0	1/1:0,47:47:99:1153,138,0	1/1:0,138:138:99:4604,410,0	1/1:0,74:74:99:2123,220,0	1/1:0,53:53:99:1547,158,0	0/1:70,55:125:99:1345,0,1492	0/1:49,48:97:99:1018,0,1100	0/1:121,83:204:99:3022,0,2658
2	8516951	rs15883849	2:8516951	21954.4	PASS	GT:AD:DP:GQ:PL	1/1:0,61:61:99:1923,183,0	1/1:0,79:79:99:2373,236,0	1/1:0,49:49:99:1361,145,0	1/1:0,163:163:99:4819,485,0	1/1:0,86:86:99:2596,256,0	1/1:0,94:94:99:2815,279,0	0/1:74,83:157:99:2071,0,1736	0/1:63,63:126:99:1498,0,1464	0/1:121,105:226:99:2543,0,3083
2	8517005	rs15883851	2:8517005	27333.4	PASS	GT:AD:DP:GQ:PL	1/1:0,66:66:99:1986,198,0	1/1:0,123:123:99:3517,367,0	1/1:0,67:67:99:1910,201,0	1/1:0,211:211:99:6220,629,0	1/1:0,119:119:99:3426,356,0	1/1:0,106:106:99:3106,316,0	0/1:93,95:188:99:2239,0,1955	0/1:76,81:157:99:1796,0,1519	0/1:148,138:286:99:3178,0,3103
2	17803011	rs735775908	2:17803011	19005.4	PASS	GT:AD:DP:GQ:PL	1/1:0,45:45:99:1412,135,0	1/1:0,77:77:99:2222,230,0	1/1:0,41:41:99:1113,123,0	1/1:0,242:242:99:6845,721,0	1/1:0,88:88:99:2644,263,0	1/1:0,63:63:99:1818,187,0	0/1:44,47:91:99:1107,0,1053	0/1:27,32:59:99:716,0,635	0/1:58,50:108:99:1173,0,1388
2	17857893	rs739828334	2:17857893	40135.4	PASS	GT:AD:DP:GQ:PL	1/1:0,99:99:99:2873,295,0	1/1:0,209:209:99:6146,625,0	1/1:0,76:76:99:2233,227,0	1/1:0,324:324:99:9377,965,0	1/1:0,205:205:99:5961,612,0	1/1:1,163:164:99:4649,452,0	0/1:104,118:222:99:3051,0,2414	0/1:66,90:156:99:2185,0,1607	0/1:156,151:307:99:3705,0,3739
2	20433668	rs316507126	2:20433668	19041.4	PASS	GT:AD:DP:GQ:PL	1/1:0,51:51:99:1516,152,0	1/1:0,166:166:99:4882,494,0	1/1:0,61:61:99:1705,181,0	1/1:0,127:127:99:3640,378,0	1/1:0,52:52:99:1425,155,0	1/1:0,64:64:99:1834,189,0	0/1:31,61:92:99:1428,0,633	0/1:17,35:52:99:833,0,333	0/1:41,73:114:99:1823,0,1027
2	20452110	rs313232826	2:20452110	11892.4	PASS	GT:AD:DP:GQ:PL	1/1:0,41:41:99:1032,120,0	1/1:0,129:129:99:3719,386,0	1/1:0,47:47:99:1352,141,0	1/1:0,81:81:99:2216,239,0	1/1:0,21:21:62:567,62,0	1/1:0,24:24:72:642,72,0	0/1:22,30:52:99:703,0,482	0/1:24,24:48:99:541,0,493	0/1:66,59:125:99:1165,0,1408
2	20535921	rs733952493	2:20535921	54282.3	PASS	GT:AD:DP:GQ:PL	1/1:0,132:132:99:4105,393,0	1/1:0,310:310:99:8854,920,0	1/1:0,142:142:99:4219,424,0	1/1:0,488:488:99:14663,1453,0	1/1:0,281:281:99:8281,837,0	1/1:0,264:264:99:7531,786,0	0/1:38,93:131:99:2414,0,744	0/1:29,64:93:99:1562,0,622	0/1:79,108:187:99:2707,0,1769
2	20545968	rs733538660	2:20545968	14342.4	PASS	GT:AD:DP:GQ:PL	1/1:0,40:40:99:1446,121,0	1/1:0,73:73:99:2676,220,0	1/1:1,37:38:86:1231,86,0	1/1:0,107:107:99:3776,321,0	1/1:0,53:53:99:1872,159,0	1/1:0,44:44:99:1532,132,0	0/1:24,21:45:99:543,0,1050	0/1:18,14:32:99:385,0,651	0/1:44,32:76:99:926,0,1764
2	40924131	rs732781420	2:40924131	7283.37	PASS	GT:AD:DP:GQ:PL	1/1:0,27:27:81:796,81,0	1/1:0,58:58:99:1616,173,0	1/1:0,24:24:72:731,72,0	1/1:0,52:52:99:1539,155,0	1/1:0,21:21:63:688,63,0	1/1:0,19:19:57:520,57,0	0/1:16,2:18:20:20,0,526	0/1:16,26:42:99:653,0,262	0/1:42,33:75:99:765,0,1420
2	40924302	rs736152548	2:40924302	6996.36	PASS	GT:AD:DP:GQ:PL	1/1:0,22:22:65:564,65,0	1/1:0,54:54:99:1529,161,0	1/1:0,37:37:99:975,109,0	1/1:0,30:30:89:759,89,0	1/1:0,32:32:96:941,96,0	1/1:0,13:13:39:445,39,0	0/1:15,9:24:99:189,0,330	0/1:5,9:14:99:238,0,108	0/1:33,63:96:99:1401,0,736
2	40924644	rs740492717	2:40924644	2023.38	PASS	GT:AD:DP:GQ:PL	0/0:25,0:25:75:0,75,1093	0/0:33,0:33:99:0,99,1422	0/0:27,0:27:81:0,81,1194	0/0:21,0:21:63:0,63,903	0/0:11,0:11:36:0,36,518	0/0:7,0:7:21:0,21,315	0/1:9,7:16:99:241,0,346	0/1:8,15:23:99:564,0,291	0/1:60,35:95:99:1263,0,2419
2	40924649	rs733004740	2:40924649	2017.38	PASS	GT:AD:DP:GQ:PL	0/0:25,0:25:75:0,75,1093	0/0:34,0:34:99:0,102,1447	0/0:26,0:26:78:0,78,1165	0/0:21,0:21:63:0,63,903	0/0:12,0:12:36:0,36,518	0/0:7,0:7:21:0,21,315	0/1:9,7:16:99:241,0,346	0/1:9,14:23:99:561,0,320	0/1:61,35:96:99:1260,0,2448
2	40924690	rs15087928	2:40924690	4860.4	PASS	GT:AD:DP:GQ:PL	1/1:0,23:23:69:668,69,0	1/1:0,32:32:95:909,95,0	1/1:0,24:24:72:686,72,0	1/1:0,14:14:42:403,42,0	1/1:0,11:11:33:335,33,0	1/1:0,6:6:18:173,18,0	0/1:7,10:17:99:268,0,160	0/1:12,7:19:99:173,0,327	0/1:43,59:102:99:1290,0,841
2	40925264	rs312318215	2:40925264	7793.4	PASS	GT:AD:DP:GQ:PL	1/1:0,21:21:62:548,62,0	1/1:0,76:76:99:2170,227,0	1/1:0,34:34:99:1031,102,0	1/1:0,14:14:42:400,42,0	1/1:0,10:10:30:305,30,0	1/1:0,1:1:3:38,3,0	0/1:15,26:41:99:631,0,297	0/1:28,17:45:99:374,0,677	0/1:41,93:134:99:2340,0,807
2	41008045	rs317075122	2:41008045	6362.65	PASS	GT:AD:DP:GQ:PL	1/1:0,31:31:92:878,92,0	1/1:0,23:23:68:659,68,0	1/1:0,23:23:69:612,69,0	1/1:0,46:46:99:1351,136,0	1/1:0,37:37:99:1004,110,0	1/1:0,30:30:90:905,90,0	0/1:5,15:20:76:415,0,76	0/1:2,9:11:16:248,0,16	0/1:9,13:22:99:335,0,150
2	41009089	rs15088026	2:41009089	2786.44	PASS	GT:AD:DP:GQ:PL	1/1:0,15:15:45:447,45,0	1/1:0,8:8:24:221,24,0	1/1:0,6:6:18:171,18,0	1/1:0,16:16:48:482,48,0	1/1:0,25:25:75:727,75,0	1/1:0,7:7:21:206,21,0	0/1:3,5:8:61:138,0,61	0/1:2,5:7:29:121,0,29	0/1:9,14:23:99:318,0,174
2	41010002	rs317568487	2:41010002	2812.5	PASS	GT:AD:DP:GQ:PL	1/1:0,16:16:48:492,48,0	1/1:0,14:14:42:473,42,0	1/1:0,12:12:36:365,36,0	1/1:0,9:9:27:254,27,0	1/1:0,14:14:42:409,42,0	1/1:0,13:13:39:395,39,0	0/1:2,1:3:2:2,0,11	0/1:5,8:13:95:207,0,95	0/1:8,12:20:99:259,0,203
2	41010013	rs739672458	2:41010013	2756.37	PASS	GT:AD:DP:GQ:PL	1/1:0,13:13:39:420,39,0	1/1:0,14:14:42:438,42,0	1/1:0,13:13:39:347,39,0	1/1:0,10:10:30:281,30,0	1/1:0,15:15:45:436,45,0	1/1:0,13:13:38:349,38,0	0/1:2,1:3:28:28,0,40	0/1:5,7:12:99:173,0,100	0/1:8,14:22:99:329,0,204
2	41603611	rs314576567	2:41603611	4129.36	PASS	GT:AD:DP:GQ:PL	0/0:84,0:84:99:0,249,2337	0/0:153,0:153:99:0,455,4194	0/0:63,0:63:99:0,186,1724	0/0:364,0:364:99:0,1077,9991	0/0:195,0:195:99:0,577,5367	0/0:169,0:169:99:0,503,4734	0/1:96,61:157:99:1323,0,2149	0/1:51,44:95:99:982,0,1109	0/1:86,82:168:99:1869,0,1936
2	41611248	rs314236768	2:41611248	4268.36	PASS	GT:AD:DP:GQ:PL	0/0:81,0:81:99:0,240,2235	0/0:159,0:159:99:0,475,4477	0/0:53,0:53:99:0,158,1424	0/0:423,1:424:99:0,1247,11667	0/0:213,0:213:99:0,636,6173	0/0:161,0:161:99:0,479,4540	0/1:93,65:158:99:1479,0,2249	0/1:62,41:103:99:892,0,1364	0/1:107,90:197:99:1942,0,2484
2	42464135	rs15089830	2:42464135	18724.4	PASS	GT:AD:DP:GQ:PL	1/1:0,36:36:99:1151,107,0	1/1:0,124:124:99:3563,370,0	1/1:0,44:44:99:1396,132,0	1/1:0,179:179:99:5541,533,0	1/1:0,76:76:99:2486,228,0	1/1:0,60:60:99:1945,180,0	0/1:7,30:37:91:803,0,91	0/1:5,24:29:78:580,0,78	0/1:20,45:65:99:1304,0,412
2	42464162	rs313028974	2:42464162	17945.4	PASS	GT:AD:DP:GQ:PL	1/1:0,44:44:99:1401,131,0	1/1:0,121:121:99:3489,362,0	1/1:0,45:45:99:1381,134,0	1/1:0,181:181:99:5156,537,0	1/1:0,80:80:99:2522,239,0	1/1:0,54:54:99:1648,162,0	0/1:10,26:36:99:633,0,165	0/1:4,23:27:40:599,0,40	0/1:22,42:64:99:1161,0,475
2	59505147	rs314254788	2:59505147	6136.37	PASS	GT:AD:DP:GQ:PL	1/1:0,11:11:33:336,33,0	1/1:0,19:19:56:544,56,0	1/1:0,25:25:75:658,75,0	1/1:0,17:17:51:493,51,0	1/1:0,11:11:33:328,33,0	1/1:0,16:16:47:443,47,0	0/1:46,48:94:99:1120,0,905	0/1:35,29:64:99:643,0,855	0/1:83,77:160:99:1616,0,1862
2	59505288	rs312710268	2:59505288	16382.4	PASS	GT:AD:DP:GQ:PL	1/1:0,20:20:63:864,63,0	1/1:0,54:54:99:2457,169,0	1/1:0,22:22:69:944,69,0	1/1:0,36:36:99:1629,114,0	1/1:0,17:17:54:786,54,0	1/1:0,21:21:63:938,63,0	0/1:45,61:106:99:2439,0,1697	0/1:52,65:117:99:2586,0,1927	0/1:122,101:223:99:3784,0,4696
2	59505294	rs316423694	2:59505294	16296.4	PASS	GT:AD:DP:GQ:PL	1/1:0,20:20:63:864,63,0	1/1:0,56:56:99:2457,169,0	1/1:0,22:22:66:919,66,0	1/1:0,39:39:99:1657,117,0	1/1:0,18:18:54:786,54,0	1/1:0,21:21:63:938,63,0	0/1:46,64:110:99:2436,0,1730	0/1:55,67:122:99:2561,0,1952	0/1:126,101:227:99:3723,0,4800
2	68353384	rs15114270	2:68353384	2702.36	PASS	GT:AD:DP:GQ:PL	0/0:153,0:153:99:0,456,4385	0/0:234,0:234:99:0,696,6502	0/0:122,0:122:99:0,362,3299	0/0:530,0:530:99:0,1571,14480	0/0:234,0:234:99:0,699,6647	0/0:233,0:233:99:0,693,6471	0/1:48,30:78:99:622,0,1051	0/1:41,37:78:99:754,0,787	0/1:72,64:136:99:1371,0,1652
2	68354300	rs315192377	2:68354300	2790.36	PASS	GT:AD:DP:GQ:PL	0/0:176,0:176:99:0,522,4788	0/0:325,2:327:99:0,927,8919	0/0:136,0:136:99:0,402,3639	0/0:681,1:682:99:0,2012,18436	0/0:270,0:270:99:0,799,7347	0/0:269,0:269:99:0,801,7353	0/1:56,42:98:99:895,0,1199	0/1:44,20:64:99:465,0,1009	0/1:88,65:153:99:1475,0,2127
2	68446794	rs13710543	2:68446794	1404.36	PASS	GT:AD:DP:GQ:PL	0/0:70,0:70:99:0,208,2087	0/0:103,0:103:99:0,308,3117	0/0:42,0:42:99:0,125,1155	0/0:258,0:258:99:0,766,7079	0/0:144,0:144:99:0,428,4021	0/0:101,0:101:99:0,302,2867	0/1:67,18:85:99:220,0,1700	0/1:36,25:61:99:482,0,887	0/1:73,40:113:99:747,0,1854
2	68464129	rs16032574	2:68464129	850.36	PASS	GT:AD:DP:GQ:PL	0/0:48,1:49:99:0,135,1443	0/0:121,0:121:99:0,356,3175	0/0:57,0:57:99:0,167,1398	0/0:222,0:222:99:0,654,5706	0/0:142,0:142:99:0,420,3753	0/0:88,0:88:99:0,262,2443	0/1:62,19:81:99:315,0,1438	0/1:29,17:46:99:327,0,671	0/1:50,17:67:99:253,0,1253
2	68476129	rs313484313	2:68476129	14947.4	PASS	GT:AD:DP:GQ:PL	1/1:0,36:36:99:1051,107,0	1/1:0,86:86:99:2449,255,0	1/1:0,35:35:99:1059,104,0	1/1:1,151:152:99:4410,418,0	1/1:0,72:72:99:2216,214,0	1/1:0,56:56:99:1622,165,0	0/1:19,26:45:99:644,0,393	0/1:17,34:51:99:848,0,337	0/1:27,30:57:99:693,0,588
2	69243971	rs315088760	2:69243971	1695.36	PASS	GT:AD:DP:GQ:PL	0/0:25,0:25:75:0,75,754	0/0:52,0:52:99:0,155,1400	0/0:36,0:36:99:0,107,1043	0/0:82,0:82:99:0,245,2355	0/0:25,0:25:75:0,75,720	0/0:22,0:22:66:0,66,661	0/1:30,33:63:99:741,0,741	0/1:25,19:44:99:461,0,663	0/1:51,25:76:99:538,0,1337
2	69244001	rs14202744	2:69244001	1600.36	PASS	GT:AD:DP:GQ:PL	0/0:22,0:22:66:0,66,671	0/0:52,0:52:99:0,156,1538	0/0:37,0:37:99:0,111,1067	0/0:81,0:81:99:0,241,2278	0/0:25,0:25:75:0,75,725	0/0:24,0:24:72:0,72,788	0/1:38,35:73:99:756,0,915	0/1:28,24:52:99:529,0,713	0/1:61,20:81:99:360,0,1539
2	69244105	rs313065594	2:69244105	15485.4	PASS	GT:AD:DP:GQ:PL	1/1:0,19:19:60:806,60,0	1/1:0,52:52:99:2303,156,0	1/1:0,28:28:84:1160,84,0	1/1:0,90:90:99:3818,271,0	1/1:0,26:26:78:1071,78,0	1/1:0,27:27:81:1162,81,0	0/1:44,52:96:99:1985,0,1448	0/1:36,32:68:99:1162,0,1250	0/1:47,54:101:99:2063,0,1712
2	69244110	rs314926214	2:69244110	15357.4	PASS	GT:AD:DP:GQ:PL	1/1:0,18:18:60:806,60,0	1/1:0,52:52:99:2303,156,0	1/1:0,26:26:78:1110,78,0	1/1:0,85:85:99:3812,273,0	1/1:0,24:24:72:1022,72,0	1/1:0,26:26:81:1162,81,0	0/1:33,50:83:99:2009,0,1265	0/1:30,31:61:99:1175,0,1154	0/1:47,51:98:99:2003,0,1740
2	78251481	rs10730804	2:78251481	81690.4	PASS	GT:AD:DP:GQ:PL	1/1:0,296:296:99:8728,883,0	1/1:1,389:390:99:11214,1144,0	1/1:0,153:153:99:4417,456,0	1/1:2,711:713:99:19555,2093,0	1/1:0,445:445:99:12676,1325,0	1/1:0,384:384:99:10502,1141,0	0/1:114,178:292:99:4406,0,2623	0/1:59,186:245:99:4798,0,1014	0/1:165,223:388:99:5439,0,3784
2	78251550	rs739011978	2:78251550	68356.4	PASS	GT:AD:DP:GQ:PL	1/1:0,237:237:99:6561,700,0	1/1:1,341:342:99:9486,989,0	1/1:0,132:132:99:3444,387,0	1/1:1,721:722:99:19610,2103,0	1/1:0,382:382:99:10488,1128,0	1/1:0,300:300:99:8024,885,0	0/1:96,135:231:99:3046,0,2101	0/1:58,152:210:99:3635,0,1135	0/1:120,177:297:99:4107,0,2543
2	78252219	rs14207626	2:78252219	17011.4	PASS	GT:AD:DP:GQ:PL	1/1:0,70:70:99:2020,207,0	1/1:0,86:86:99:2508,256,0	1/1:0,34:34:99:998,102,0	1/1:0,188:188:99:5477,561,0	1/1:0,64:64:99:1734,189,0	1/1:0,52:52:99:1602,156,0	0/1:32,37:69:99:857,0,652	0/1:18,38:56:99:987,0,393	0/1:31,37:68:99:873,0,743
2	79178542	rs314355276	2:79178542	2689.36	PASS	GT:AD:DP:GQ:PL	0/0:30,0:30:89:0,89,911	0/0:65,0:65:99:0,195,2057	0/0:40,0:40:99:0,120,1117	0/0:97,0:97:99:0,290,2972	0/0:27,0:27:81:0,81,868	0/0:39,0:39:99:0,116,1097	0/1:39,33:72:99:685,0,940	0/1:36,18:54:99:317,0,897	0/1:57,74:131:99:1732,0,1313
2	79182220	rs734554341	2:79182220	11802.4	PASS	GT:AD:DP:GQ:PL	1/1:0,33:33:99:1054,101,0	1/1:0,65:65:99:2188,195,0	1/1:0,27:27:80:900,80,0	1/1:0,75:75:99:2432,224,0	1/1:0,45:45:99:1364,134,0	1/1:0,24:24:72:833,72,0	0/1:38,37:75:99:910,0,983	0/1:39,28:67:99:680,0,966	0/1:83,57:140:99:1486,0,2042
2	79732899	rs316720716	2:79732899	141.37	PASS	GT:AD:DP:GQ:PL	0/0:16,0:16:51:0,51,720	0/0:36,0:36:99:0,108,1350	0/0:25,0:25:75:0,75,779	0/0:71,0:71:99:0,221,2566	0/0:47,0:47:99:0,147,1933	0/0:56,1:57:99:0,137,1679	0/1:11,4:15:77:77,0,422	0/1:9,2:11:37:37,0,241	0/1:12,4:16:72:72,0,324
2	79735419	rs316691790	2:79735419	12043.2	PASS	GT:AD:DP:GQ:PL	1/1:0,29:29:87:911,87,0	1/1:0,56:56:99:1416,165,0	1/1:0,36:36:99:961,108,0	1/1:0,135:135:99:3625,396,0	1/1:0,56:56:99:1523,167,0	1/1:0,105:105:99:2758,311,0	0/1:6,16:22:67:352,0,67	0/1:2,11:13:11:252,0,11	0/1:12,13:25:99:289,0,239
2	89706657	rs312273274	2:89706657	10330.4	PASS	GT:AD:DP:GQ:PL	0/0:61,0:61:99:0,180,1588	0/0:199,0:199:99:0,592,5166	0/0:74,0:74:99:0,221,1958	0/0:247,0:247:99:0,730,6274	0/0:120,0:120:99:0,357,3109	0/0:93,0:93:99:0,276,2388	0/1:132,185:317:99:4090,0,2448	0/1:119,141:260:99:3219,0,2337	0/1:211,151:362:99:3066,0,4599
2	89706803	rs10722181	2:89706803	39125.4	PASS	GT:AD:DP:GQ:PL	1/1:0,65:65:99:2863,196,0	1/1:0,136:136:99:6061,410,0	1/1:0,57:57:99:2514,172,0	1/1:0,170:170:99:7407,510,0	1/1:0,70:70:99:3028,209,0	1/1:0,91:91:99:4074,274,0	0/1:112,126:238:99:4858,0,4402	0/1:94,80:174:99:3061,0,3764	0/1:123,136:259:99:5304,0,5007
2	89706804	rs10729569	2:89706804	39123.4	PASS	GT:AD:DP:GQ:PL	1/1:0,65:65:99:2863,196,0	1/1:0,136:136:99:6060,410,0	1/1:0,57:57:99:2514,172,0	1/1:0,170:170:99:7407,510,0	1/1:0,69:69:99:3028,209,0	1/1:0,91:91:99:4074,274,0	0/1:112,126:238:99:4858,0,4402	0/1:93,80:173:99:3061,0,3764	0/1:121,136:257:99:5303,0,5008
2	89707206	rs10730245	2:89707206	38258.4	PASS	GT:AD:DP:GQ:PL	1/1:0,67:67:99:3004,202,0	1/1:0,136:136:99:5948,409,0	1/1:0,66:66:99:2906,199,0	1/1:0,139:139:99:6087,418,0	1/1:0,99:99:99:4431,298,0	1/1:0,50:50:99:2252,156,0	0/1:166,134:300:99:5018,0,6582	0/1:128,89:217:99:3292,0,5125	0/1:218,145:363:99:5365,0,8732
2	89707207	rs10723400	2:89707207	38260.4	PASS	GT:AD:DP:GQ:PL	1/1:0,67:67:99:3004,202,0	1/1:0,136:136:99:5948,409,0	1/1:0,66:66:99:2906,199,0	1/1:0,139:139:99:6086,418,0	1/1:0,99:99:99:4431,298,0	1/1:0,50:50:99:2252,156,0	0/1:167,134:301:99:5018,0,6582	0/1:127,89:216:99:3292,0,5125	0/1:217,145:362:99:5368,0,8711
2	89707311	rs315242739	2:89707311	16977.4	PASS	GT:AD:DP:GQ:PL	1/1:0,56:56:99:1589,166,0	1/1:0,83:83:99:2276,246,0	1/1:0,57:57:99:1510,169,0	1/1:0,113:113:99:3085,334,0	1/1:0,68:68:99:1837,201,0	1/1:0,46:46:99:1207,134,0	0/1:83,87:170:99:1768,0,1863	0/1:80,66:146:99:1322,0,1834	0/1:103,111:214:99:2428,0,2437
2	89707617	rs312983521	2:89707617	7523.37	PASS	GT:AD:DP:GQ:PL	1/1:0,15:15:45:509,45,0	1/1:0,31:31:92:935,92,0	1/1:0,11:11:33:392,33,0	1/1:1,30:31:56:931,56,0	1/1:0,19:19:56:570,56,0	1/1:0,14:14:42:441,42,0	0/1:12,52:64:99:1466,0,502	0/1:18,30:48:99:724,0,355	0/1:10,59:69:99:1600,0,328
2	89707650	rs739151498	2:89707650	7491.37	PASS	GT:AD:DP:GQ:PL	1/1:0,12:12:36:465,36,0	1/1:0,19:19:63:853,63,0	1/1:0,8:8:24:359,24,0	1/1:0,15:15:54:743,54,0	1/1:0,14:14:48:641,48,0	1/1:0,11:11:36:467,36,0	0/1:14,41:55:99:1603,0,732	0/1:18,21:39:99:852,0,625	0/1:14,36:50:99:1553,0,662
2	89707791	rs733287438	2:89707791	12030.4	PASS	GT:AD:DP:GQ:PL	1/1:0,14:14:42:530,42,0	1/1:1,39:40:86:1627,86,0	1/1:0,12:12:36:498,36,0	1/1:0,43:43:99:1772,129,0	1/1:0,20:20:60:885,60,0	1/1:0,13:13:39:539,39,0	0/1:12,62:74:99:2380,0,648	0/1:19,40:59:99:1446,0,551	0/1:11,60:71:99:2398,0,539
2	89707888	rs740470464	2:89707888	10186.4	PASS	GT:AD:DP:GQ:PL	1/1:0,13:13:39:402,39,0	1/1:0,50:50:99:1459,150,0	1/1:0,23:23:69:749,69,0	1/1:0,61:61:99:1827,183,0	1/1:0,30:30:90:821,90,0	1/1:0,8:8:23:225,23,0	0/1:6,66:72:35:1766,0,35	0/1:23,51:74:99:1208,0,435	0/1:15,68:83:99:1774,0,496
2	89707953	rs316320263	2:89707953	13182.4	PASS	GT:AD:DP:GQ:PL	1/1:0,20:20:63:792,63,0	1/1:0,48:48:99:1982,150,0	1/1:0,24:24:75:1010,75,0	1/1:0,45:45:99:2068,153,0	1/1:0,14:14:54:732,54,0	1/1:0,6:6:18:264,18,0	0/1:7,68:75:63:2802,0,63	0/1:19,32:51:99:1345,0,520	0/1:13,55:68:99:2232,0,360
2	89708345	rs314632113	2:89708345	7941.51	PASS	GT:AD:DP:GQ:PL	1/1:0,22:22:66:727,66,0	1/1:0,43:43:99:1272,128,0	1/1:0,19:19:57:567,57,0	1/1:0,22:22:65:562,65,0	1/1:0,18:18:54:519,54,0	1/1:0,4:4:12:97,12,0	0/1:10,65:75:99:1753,0,275	0/1:23,44:67:99:1053,0,476	0/1:6,53:59:99:1436,0,115
2	89761091	rs318163377	2:89761091	161.42	PASS	GT:AD:DP:GQ:PL	0/0:30,0:30:93:0,93,1753	0/0:97,0:97:99:0,292,4822	0/0:80,0:80:99:0,246,4161	0/0:70,0:70:99:0,213,3367	0/0:15,0:15:45:0,45,729	0/0:19,0:19:57:0,57,902	0/1:4,0:4:23:23,0,199	0/1:6,2:8:53:53,0,303	0/1:6,4:10:99:130,0,296
2	89761100	rs737833495	2:89761100	107.47	PASS	GT:AD:DP:GQ:PL	0/0:32,0:32:96:0,96,1778	0/0:91,0:91:99:0,277,4649	0/0:78,0:78:99:0,237,4054	0/0:69,0:69:99:0,208,3320	0/0:15,0:15:45:0,45,729	0/0:19,0:19:57:0,57,902	0/1:4,1:5:23:23,0,199	0/1:6,1:7:24:24,0,306	0/1:7,3:10:99:105,0,330
2	89935040	rs317307092	2:89935040	43406.4	PASS	GT:AD:DP:GQ:PL	1/1:2,219:221:99:5969,622,0	1/1:0,508:508:99:13504,1507,0	1/1:0,237:237:99:6347,702,0	1/1:2,310:312:99:8129,900,0	1/1:1,151:152:99:4235,446,0	1/1:0,88:88:99:2381,261,0	0/1:33,36:69:99:764,0,705	0/1:30,30:60:99:651,0,652	0/1:60,66:126:99:1471,0,1247
2	89935151	rs316420244	2:89935151	39896.4	PASS	GT:AD:DP:GQ:PL	1/1:0,201:201:99:5202,588,0	1/1:0,521:521:99:13471,1530,0	1/1:0,206:206:99:5413,605,0	1/1:1,321:322:99:7439,895,0	1/1:1,133:134:99:3192,354,0	1/1:0,89:89:99:2069,258,0	0/1:37,27:64:99:638,0,774	0/1:16,37:53:99:727,0,305	0/1:74,77:151:99:1790,0,1711
2	100527946	rs731266698	2:100527946	16894.4	PASS	GT:AD:DP:GQ:PL	1/1:0,45:45:99:1291,134,0	1/1:0,98:98:99:2937,294,0	1/1:0,74:74:99:2066,220,0	1/1:0,50:50:99:1483,149,0	1/1:0,36:36:99:1086,108,0	1/1:0,17:17:51:483,51,0	0/1:55,71:126:99:1681,0,1131	0/1:47,71:118:99:1696,0,995	0/1:155,173:328:99:4216,0,3311
2	100533280	rs735327118	2:100533280	1863.72	PASS	GT:AD:DP:GQ:PL	1/1:0,8:8:24:257,24,0	1/1:0,9:9:27:280,27,0	1/1:0,10:10:30:289,30,0	1/1:0,4:4:12:123,12,0	1/1:0,4:4:12:133,12,0	1/1:0,1:1:3:39,3,0	0/1:9,8:17:99:201,0,354	0/1:8,8:16:99:209,0,215	0/1:19,16:35:99:376,0,493
2	100654080	.	2:100654080	49332.4	PASS	GT:AD:DP:GQ:PL	1/1:0,112:112:99:2941,333,0	1/1:0,325:325:99:8576,968,0	1/1:0,144:144:99:3629,427,0	1/1:0,691:691:99:17886,2053,0	1/1:0,340:340:99:8854,1012,0	1/1:0,188:188:99:4993,561,0	0/1:25,49:74:99:1114,0,545	0/1:7,30:37:94:708,0,94	0/1:16,30:46:99:676,0,357
2	100672225	rs316031739	2:100672225	192064	PASS	GT:AD:DP:GQ:PL	1/1:2,560:562:99:16803,1621,0	1/1:2,989:991:99:29280,2902,0	1/1:0,438:438:99:13181,1311,0	1/1:1,1905:1906:99:57779,5685,0	1/1:0,1198:1198:99:35641,3607,0	1/1:0,859:859:99:25953,2586,0	0/1:57,222:279:99:5639,0,691	0/1:62,143:205:99:3564,0,1057	0/1:104,169:273:99:4269,0,1899
2	100682763	rs318147579	2:100682763	109209	PASS	GT:AD:DP:GQ:PL	1/1:0,485:485:99:15037,1442,0	1/1:0,560:560:99:18452,1675,0	1/1:0,359:359:99:10738,1068,0	1/1:2,679:681:99:21891,2012,0	1/1:0,575:575:99:18868,1718,0	1/1:0,478:478:99:15253,1419,0	0/1:58,137:195:99:3559,0,1153	0/1:40,80:120:99:2098,0,691	0/1:73,126:199:99:3367,0,1549
2	100688259	rs312815967	2:100688259	114265	PASS	GT:AD:DP:GQ:PL	1/1:0,401:401:99:12103,1194,0	1/1:0,616:616:99:19590,1844,0	1/1:0,330:330:99:9378,982,0	1/1:0,992:992:99:30605,2964,0	1/1:0,577:577:99:17864,1721,0	1/1:1,610:611:99:18865,1783,0	0/1:21,94:115:99:2617,0,308	0/1:27,52:79:99:1348,0,636	0/1:48,80:128:99:1940,0,1073
2	100707550	rs732722573	2:100707550	970.97	PASS	GT:AD:DP:GQ:PL	1/1:0,3:3:9:111,9,0	1/1:0,1:1:3:37,3,0	1/1:0,2:2:6:49,6,0	1/1:0,8:8:23:185,23,0	1/1:0,6:6:18:133,18,0	1/1:0,2:2:6:74,6,0	0/1:5,4:9:54:54,0,117	0/1:5,3:8:61:61,0,201	0/1:14,16:30:99:309,0,541
2	100712422	rs315779443	2:100712422	1382.26	PASS	GT:AD:DP:GQ:PL	1/1:0,2:2:6:49,6,0	1/1:0,9:9:27:236,27,0	1/1:0,4:4:12:94,12,0	1/1:0,9:9:27:257,27,0	1/1:0,6:6:18:152,18,0	1/1:0,4:4:12:87,12,0	0/1:4,3:7:66:66,0,82	0/1:2,6:8:46:139,0,46	0/1:15,16:31:99:346,0,292
2	102095946	rs314014865	2:102095946	77908.4	PASS	GT:AD:DP:GQ:PL	1/1:0,242:242:99:6808,723,0	1/1:0,334:334:99:9338,997,0	1/1:0,129:129:99:3452,383,0	1/1:0,925:925:99:25373,2750,0	1/1:1,513:514:99:14660,1497,0	1/1:0,432:432:99:11843,1289,0	0/1:30,120:150:99:2972,0,402	0/1:36,61:97:99:1492,0,647	0/1:37,87:124:99:2015,0,633
2	102096196	rs312569361	2:102096196	1254.36	PASS	GT:AD:DP:GQ:PL	0/0:159,0:159:99:0,472,4320	0/0:174,0:174:99:0,517,5006	0/0:101,0:101:99:0,300,2790	0/0:675,0:675:99:0,2008,18876	0/0:410,0:410:99:0,1223,11482	0/0:315,1:316:99:0,908,8664	0/1:72,21:93:99:366,0,1708	0/1:43,14:57:99:267,0,1029	0/1:36,29:65:99:666,0,844
2	102096380	rs317102766	2:102096380	937.36	PASS	GT:AD:DP:GQ:PL	0/0:147,0:147:99:0,435,4159	0/0:220,0:220:99:0,656,6059	0/0:104,0:104:99:0,309,3005	0/0:528,0:528:99:0,1576,14974	0/0:375,0:375:99:0,1115,10867	0/0:282,1:283:99:0,818,8139	0/1:65,14:79:99:108,0,1631	0/1:53,11:64:99:105,0,1313	0/1:55,37:92:99:769,0,1380
2	102096419	rs315302113	2:102096419	858.37	PASS	GT:AD:DP:GQ:PL	0/0:149,0:149:99:0,449,4594	0/0:217,0:217:99:0,652,6429	0/0:94,0:94:99:0,281,2851	0/0:487,0:487:99:0,1452,14641	0/0:337,0:337:99:0,1009,10395	0/0:243,0:243:99:0,729,7419	0/1:69,10:79:31:31,0,1695	0/1:53,13:66:99:174,0,1420	0/1:55,32:87:99:698,0,1425
2	102163026	rs315063514	2:102163026	83067.4	PASS	GT:AD:DP:GQ:PL	1/1:1,237:238:99:7425,674,0	1/1:0,436:436:99:13526,1305,0	1/1:0,199:199:99:6038,595,0	1/1:0,486:486:99:16441,1452,0	1/1:0,434:434:99:13741,1299,0	1/1:0,354:354:99:11045,1059,0	0/1:93,157:250:99:4227,0,1847	0/1:129,159:288:99:4099,0,2730	0/1:200,259:459:99:6570,0,4566
2	102164962	rs741099082	2:102164962	108620	PASS	GT:AD:DP:GQ:PL	1/1:0,323:323:99:9296,964,0	1/1:0,541:541:99:15653,1616,0	1/1:0,250:250:99:7246,749,0	1/1:0,1105:1105:99:32184,3296,0	1/1:0,512:512:99:15213,1536,0	1/1:0,475:475:99:13895,1427,0	0/1:143,194:337:99:4710,0,2847	0/1:105,154:259:99:3684,0,2090	0/1:242,286:528:99:6784,0,5381
2	102165364	rs738458956	2:102165364	83232.4	PASS	GT:AD:DP:GQ:PL	1/1:0,289:289:99:8391,858,0	1/1:0,462:462:99:13260,1383,0	1/1:2,209:211:99:5917,584,0	1/1:1,645:646:99:19511,1898,0	1/1:0,422:422:99:13225,1262,0	1/1:0,311:311:99:9833,931,0	0/1:103,165:268:99:4022,0,2375	0/1:103,130:233:99:3100,0,2234	0/1:231,246:477:99:6018,0,5713
2	102170359	rs738901305	2:102170359	79384.4	PASS	GT:AD:DP:GQ:PL	1/1:0,217:217:99:6220,648,0	1/1:0,464:464:99:13523,1383,0	1/1:1,182:183:99:5100,528,0	1/1:0,596:596:99:18447,1793,0	1/1:0,421:421:99:11896,1252,0	1/1:0,412:412:99:11708,1219,0	0/1:94,150:244:99:3376,0,1971	0/1:97,137:234:99:3159,0,1907	0/1:196,262:458:99:6000,0,4364
2	102196369	rs313469472	2:102196369	73316.4	PASS	GT:AD:DP:GQ:PL	1/1:0,180:180:99:5469,538,0	1/1:0,422:422:99:12418,1264,0	1/1:0,211:211:99:5972,628,0	1/1:0,646:646:99:19339,1932,0	1/1:0,366:366:99:10549,1089,0	1/1:0,312:312:99:9045,934,0	0/1:104,108:212:99:2529,0,2176	0/1:122,109:231:99:2470,0,2417	0/1:192,235:427:99:5570,0,3898
2	102199846	rs16085325	2:102199846	110310	PASS	GT:AD:DP:GQ:PL	1/1:1,346:347:99:10847,1029,0	1/1:0,536:536:99:17624,1598,0	1/1:0,247:247:99:7741,740,0	1/1:0,663:663:99:22323,1953,0	1/1:1,517:518:99:16836,1541,0	1/1:0,524:524:99:16873,1565,0	0/1:142,215:357:99:5365,0,2789	0/1:127,200:327:99:5361,0,2570	0/1:293,286:579:99:7385,0,6911
2	102200189	rs16085329	2:102200189	11541.4	PASS	GT:AD:DP:GQ:PL	0/0:318,0:318:99:0,951,9991	0/0:546,0:546:99:0,1635,16736	0/0:248,0:248:99:0,742,7700	0/0:717,0:717:99:0,2146,22750	0/0:520,0:520:99:0,1558,16446	0/0:493,0:493:99:0,1475,14601	0/1:188,132:320:99:2944,0,4752	0/1:180,130:310:99:2965,0,4726	0/1:284,236:520:99:5677,0,7450
2	102489928	rs738913056	2:102489928	92003.4	PASS	GT:AD:DP:GQ:PL	1/1:0,279:279:99:8039,827,0	1/1:0,523:523:99:15123,1560,0	1/1:0,216:216:99:5827,641,0	1/1:3,792:795:99:22901,2265,0	1/1:1,531:532:99:15369,1576,0	1/1:2,506:508:99:14004,1476,0	0/1:46,149:195:99:3603,0,669	0/1:44,123:167:99:2805,0,588	0/1:73,190:263:99:4377,0,1220
2	102499602	rs794452683	2:102499602	125567	PASS	GT:AD:DP:GQ:PL	1/1:0,300:300:99:13121,905,0	1/1:0,423:423:99:18628,1272,0	1/1:2,191:193:99:8315,496,0	1/1:0,694:694:99:30158,2103,0	1/1:0,474:474:99:20721,1431,0	1/1:0,438:438:99:19094,1321,0	0/1:90,148:238:99:5808,0,3162	0/1:81,124:205:99:4763,0,2911	0/1:106,130:236:99:5004,0,4002
2	102499605	rs794296294	2:102499605	132877	PASS	GT:AD:DP:GQ:PL	1/1:0,308:308:99:13662,933,0	1/1:0,459:459:99:20057,1393,0	1/1:0,205:205:99:8885,620,0	1/1:0,744:744:99:32370,2273,0	1/1:0,497:497:99:21824,1510,0	1/1:0,463:463:99:20176,1405,0	0/1:90,148:238:99:5874,0,3156	0/1:80,128:208:99:4913,0,2898	0/1:107,133:240:99:5161,0,4006
2	102508816	rs313742707	2:102508816	94701.4	PASS	GT:AD:DP:GQ:PL	1/1:1,268:269:99:7934,801,0	1/1:1,538:539:99:15708,1578,0	1/1:0,222:222:99:6475,662,0	1/1:4,982:986:99:27738,2827,0	1/1:0,580:580:99:16483,1738,0	1/1:3,462:465:99:13541,1296,0	0/1:78,114:192:99:2663,0,1798	0/1:76,76:152:99:1714,0,1863	0/1:101,107:208:99:2490,0,2316
2	102625706	rs740473073	2:102625706	19596.3	PASS	GT:AD:DP:GQ:PL	1/1:0,73:73:99:2273,219,0	1/1:0,142:142:99:4231,423,0	1/1:0,51:51:99:1449,152,0	1/1:0,152:152:99:5016,455,0	1/1:1,78:79:99:2386,230,0	1/1:0,47:47:99:1598,141,0	0/1:9,35:44:99:893,0,122	0/1:11,31:42:99:853,0,179	0/1:24,35:59:99:951,0,566
2	102625840	rs312823377	2:102625840	1341.36	PASS	GT:AD:DP:GQ:PL	0/0:102,0:102:99:0,303,2901	0/0:218,0:218:99:0,651,6276	0/0:84,0:84:99:0,250,2405	0/0:352,0:352:99:0,1049,9958	0/0:117,0:117:99:0,347,3323	0/0:109,0:109:99:0,326,3192	0/1:45,19:64:99:358,0,1157	0/1:43,6:49:70:70,0,1082	0/1:64,46:110:99:958,0,1498
2	102629894	rs10726151	2:102629894	31339.4	PASS	GT:AD:DP:GQ:PL	1/1:0,88:88:99:2529,261,0	1/1:1,201:202:99:5827,568,0	1/1:0,77:77:99:2153,229,0	1/1:0,341:341:99:9577,1012,0	1/1:0,140:140:99:4010,417,0	1/1:0,119:119:99:3413,356,0	0/1:14,42:56:99:1032,0,261	0/1:8,33:41:96:849,0,96	0/1:28,79:107:99:1994,0,555
2	102685608	rs734149727	2:102685608	75452.4	PASS	GT:AD:DP:GQ:PL	1/1:0,246:246:99:7457,735,0	1/1:0,445:445:99:13279,1332,0	1/1:0,179:179:99:5240,540,0	1/1:0,436:436:99:14824,1314,0	1/1:0,451:451:99:13845,1351,0	1/1:0,443:443:99:13478,1323,0	0/1:55,95:150:99:2375,0,1069	0/1:44,78:122:99:1994,0,894	0/1:98,131:229:99:3005,0,2118
2	102688595	rs318187827	2:102688595	104251	PASS	GT:AD:DP:GQ:PL	1/1:0,259:259:99:7231,774,0	1/1:0,462:462:99:12686,1379,0	1/1:0,266:266:99:7248,794,0	1/1:0,1424:1424:99:38590,4226,0	1/1:0,545:545:99:15284,1626,0	1/1:0,600:600:99:16870,1792,0	0/1:57,87:144:99:1970,0,1008	0/1:69,77:146:99:1642,0,1341	0/1:114,128:242:99:2775,0,2434
2	102689169	rs316039590	2:102689169	6504.36	PASS	GT:AD:DP:GQ:PL	0/0:338,0:338:99:0,1010,10824	0/0:588,0:588:99:0,1760,18215	0/0:297,0:297:99:0,887,9304	0/0:1388,1:1389:99:0,4095,42650	0/0:673,0:673:99:0,2002,20267	0/0:652,0:652:99:0,1958,21425	0/1:88,69:157:99:1513,0,2320	0/1:119,82:201:99:1702,0,3044	0/1:176,142:318:99:3334,0,4295
2	102690386	rs15136644	2:102690386	5154.36	PASS	GT:AD:DP:GQ:PL	0/0:264,2:266:99:0,748,7891	0/0:515,0:515:99:0,1529,14301	0/0:227,0:227:99:0,684,6678	0/0:901,2:903:99:0,2639,26276	0/0:522,0:522:99:0,1556,15548	0/0:482,1:483:99:0,1407,13745	0/1:76,56:132:99:1190,0,1908	0/1:88,58:146:99:1244,0,2150	0/1:158,126:284:99:2765,0,3965
2	102692430	rs312357527	2:102692430	84805.4	PASS	GT:AD:DP:GQ:PL	1/1:0,192:192:99:8387,589,0	1/1:0,255:255:99:11237,790,0	1/1:0,137:137:99:5897,418,0	1/1:1,601:602:99:25588,1813,0	1/1:0,328:328:99:14501,1005,0	1/1:0,279:279:99:12279,868,0	0/1:38,49:87:99:1829,0,1284	0/1:45,48:93:99:1799,0,1662	0/1:87,84:171:99:3333,0,3255
2	102692500	rs3137197	2:102692500	4503.36	PASS	GT:AD:DP:GQ:PL	0/0:210,0:210:99:0,628,6449	0/0:338,0:338:99:0,1012,10088	0/0:190,0:190:99:0,566,5569	0/0:833,0:833:99:0,2485,24659	0/0:417,0:417:99:0,1250,12743	0/0:381,0:381:99:0,1140,11509	0/1:69,42:111:99:873,0,1656	0/1:55,43:98:99:1057,0,1344	0/1:110,111:221:99:2618,0,2786
2	102692541	rs312706299	2:102692541	71449.4	PASS	GT:AD:DP:GQ:PL	1/1:0,174:174:99:5267,524,0	1/1:2,316:318:99:9402,928,0	1/1:0,172:172:99:4925,514,0	1/1:0,818:818:99:24222,2455,0	1/1:0,373:373:99:11190,1126,0	1/1:0,368:368:99:10790,1112,0	0/1:30,73:103:99:1742,0,576	0/1:36,47:83:99:1056,0,724	0/1:112,116:228:99:2900,0,2460
2	102692757	rs15136645	2:102692757	3228.29	PASS	GT:AD:DP:GQ:PL	0/0:248,0:248:99:0,742,7171	0/0:330,2:332:99:0,940,9495	0/0:172,0:172:99:0,517,5185	0/0:820,1:821:99:0,2416,24256	0/0:430,0:430:99:0,1288,12539	0/0:345,1:346:99:0,1003,10265	0/1:67,35:102:99:637,0,1658	0/1:49,35:84:99:686,0,1139	0/1:133,96:229:99:1950,0,2999
2	102692835	rs29006376	2:102692835	6677.36	PASS	GT:AD:DP:GQ:PL	0/0:235,0:235:99:0,710,10323	0/0:358,0:358:99:0,1076,15480	0/0:161,0:161:99:0,484,6931	0/0:869,0:869:99:0,2617,38249	0/0:412,0:412:99:0,1241,17880	0/0:335,0:335:99:0,1008,14653	0/1:68,43:111:99:1507,0,2644	0/1:54,44:98:99:1589,0,2124	0/1:107,99:206:99:3626,0,3991
2	102692851	rs29006377	2:102692851	8039.36	PASS	GT:AD:DP:GQ:PL	0/0:255,0:255:99:0,768,11432	0/0:400,0:400:99:0,1219,18098	0/0:175,0:175:99:0,527,7852	0/0:996,0:996:99:0,3031,45122	0/0:464,0:464:99:0,1412,21052	0/0:380,0:380:99:0,1162,17315	0/1:81,50:131:99:1840,0,3293	0/1:69,42:111:99:1584,0,2810	0/1:121,115:236:99:4660,0,4706
2	102692863	rs737138922	2:102692863	7855.36	PASS	GT:AD:DP:GQ:PL	0/0:249,0:249:99:0,768,11422	0/0:399,0:399:99:0,1210,18059	0/0:177,0:177:99:0,542,8057	0/0:991,0:991:99:0,3013,44905	0/0:461,0:461:99:0,1412,21045	0/0:375,0:375:99:0,1153,17167	0/1:83,42:125:99:1714,0,3344	0/1:72,44:116:99:1620,0,2891	0/1:126,114:240:99:4566,0,4997
2	102692867	rs740709144	2:102692867	7431.36	PASS	GT:AD:DP:GQ:PL	0/0:249,0:249:99:0,756,11253	0/0:392,0:392:99:0,1195,17865	0/0:175,0:175:99:0,536,7978	0/0:960,0:960:99:0,2905,43290	0/0:457,0:457:99:0,1394,20785	0/0:374,0:374:99:0,1129,16819	0/1:82,42:124:99:1507,0,3309	0/1:72,42:114:99:1617,0,2898	0/1:122,109:231:99:4352,0,4972
2	102693038	rs10730103	2:102693038	7553.36	PASS	GT:AD:DP:GQ:PL	0/0:230,0:230:99:0,686,7105	0/0:443,0:443:99:0,1334,13351	0/0:212,0:212:99:0,630,6020	0/0:1166,2:1168:99:0,3446,33975	0/0:475,0:475:99:0,1417,14659	0/0:390,0:390:99:0,1165,11688	0/1:63,56:119:99:2097,0,1616	0/1:66,31:97:99:1195,0,1734	0/1:105,106:211:99:4306,0,2647
2	102693053	rs736676012	2:102693053	5250.36	PASS	GT:AD:DP:GQ:PL	0/0:212,0:212:99:0,644,9147	0/0:404,0:404:99:0,1225,17929	0/0:202,0:202:99:0,613,8809	0/0:1165,0:1165:99:0,3513,49837	0/0:452,0:452:99:0,1364,19756	0/0:402,0:402:99:0,1211,17307	0/1:53,57:110:99:1463,0,1956	0/1:63,38:101:99:877,0,2484	0/1:105,127:232:99:2955,0,3867
2	102693192	rs733025236	2:102693192	83701.4	PASS	GT:AD:DP:GQ:PL	1/1:0,231:231:99:7025,690,0	1/1:0,418:418:99:12151,1247,0	1/1:0,149:149:99:4394,443,0	1/1:3,1029:1032:99:30153,2977,0	1/1:0,447:447:99:13389,1336,0	1/1:0,395:395:99:11699,1182,0	0/1:46,55:101:99:1301,0,1072	0/1:60,52:112:99:1169,0,1349	0/1:112,110:222:99:2465,0,2692
2	102693339	rs315240133	2:102693339	3797.36	PASS	GT:AD:DP:GQ:PL	0/0:205,0:205:99:0,614,6635	0/0:443,0:443:99:0,1327,14028	0/0:150,0:150:99:0,447,4586	0/0:995,1:996:99:0,2940,30800	0/0:393,1:394:99:0,1145,12524	0/0:365,2:367:99:0,1050,11649	0/1:56,39:95:99:829,0,1379	0/1:65,44:109:99:955,0,1476	0/1:95,90:185:99:2058,0,2373
2	102693535	rs316459201	2:102693535	2918.36	PASS	GT:AD:DP:GQ:PL	0/0:156,0:156:99:0,465,4672	0/0:282,0:282:99:0,840,8291	0/0:112,0:112:99:0,334,3267	0/0:489,0:489:99:0,1454,14516	0/0:271,1:272:99:0,783,7972	0/0:161,0:161:99:0,480,4984	0/1:60,33:93:99:703,0,1427	0/1:30,31:61:99:663,0,736	0/1:84,69:153:99:1597,0,1989
2	102701086	rs734010965	2:102701086	37850.4	PASS	GT:AD:DP:GQ:PL	1/1:0,86:86:99:2841,257,0	1/1:0,168:168:99:5592,505,0	1/1:0,83:83:99:2785,249,0	1/1:0,337:337:99:9982,999,0	1/1:2,174:176:99:5391,475,0	1/1:1,138:139:99:4446,380,0	0/1:63,77:140:99:2106,0,1478	0/1:61,62:123:99:1584,0,1466	0/1:80,109:189:99:3168,0,1876
2	102702772	rs740296500	2:102702772	39945.4	PASS	GT:AD:DP:GQ:PL	1/1:0,90:90:99:2637,267,0	1/1:0,202:202:99:6268,605,0	1/1:0,95:95:99:2774,284,0	1/1:0,373:373:99:11023,1108,0	1/1:0,174:174:99:5440,520,0	1/1:0,176:176:99:5319,525,0	0/1:69,79:148:99:1971,0,1508	0/1:56,67:123:99:1486,0,1365	0/1:96,118:214:99:3072,0,2291
2	102703334	rs314000838	2:102703334	5001.36	PASS	GT:AD:DP:GQ:PL	0/0:93,0:93:99:0,276,2583	0/0:206,0:206:99:0,616,5860	0/0:111,0:111:99:0,330,2999	0/0:418,2:420:99:0,1194,11170	0/0:185,0:185:99:0,548,5170	0/0:183,0:183:99:0,545,5160	0/1:101,68:169:99:1619,0,2382	0/1:99,65:164:99:1404,0,2199	0/1:155,86:241:99:2023,0,3771
2	102708691	rs10722585	2:102708691	42572.4	PASS	GT:AD:DP:GQ:PL	1/1:0,138:138:99:4009,412,0	1/1:0,196:196:99:5673,585,0	1/1:0,101:101:99:2776,300,0	1/1:1,471:472:99:13284,1380,0	1/1:0,211:211:99:6001,627,0	1/1:0,128:128:99:3637,382,0	0/1:78,87:165:99:2048,0,1712	0/1:65,73:138:99:1732,0,1441	0/1:119,145:264:99:3457,0,2999
2	102708979	rs10730897	2:102708979	7021.36	PASS	GT:AD:DP:GQ:PL	0/0:95,0:95:99:0,275,2912	0/0:210,0:210:99:0,626,6095	0/0:104,0:104:99:0,309,2885	0/0:383,0:383:99:0,1134,10948	0/0:190,0:190:99:0,564,5478	0/0:144,0:144:99:0,430,4272	0/1:84,83:167:99:2090,0,1793	0/1:69,83:152:99:2018,0,1605	0/1:129,116:245:99:2958,0,3199
2	102709107	rs737748024	2:102709107	40892.4	PASS	GT:AD:DP:GQ:PL	1/1:0,127:127:99:4039,381,0	1/1:0,201:201:99:6183,600,0	1/1:0,110:110:99:3316,329,0	1/1:0,350:350:99:10490,1039,0	1/1:0,182:182:99:5702,545,0	1/1:0,124:124:99:3925,372,0	0/1:81,88:169:99:2180,0,2078	0/1:84,79:163:99:1954,0,2086	0/1:113,129:242:99:3148,0,3032
2	102713391	rs732792307	2:102713391	5141.36	PASS	GT:AD:DP:GQ:PL	0/0:1284,0:1284:99:0,3961,58991	0/0:2036,0:2036:99:0,6263,93685	0/0:1067,0:1067:99:0,3309,49124	0/0:2611,0:2611:99:0,8148,120143	0/0:1641,0:1641:99:0,5093,75564	0/0:1176,0:1176:99:0,3635,54127	0/1:418,87:505:99:928,0,17655	0/1:212,82:294:99:1350,0,8896	0/1:311,137:448:99:2908,0,13074
2	102713392	rs315813915	2:102713392	9689.36	PASS	GT:AD:DP:GQ:PL	0/0:1305,1:1306:99:0,3875,37589	0/0:2062,12:2074:99:0,6019,56985	0/0:1084,6:1090:99:0,3187,30303	0/0:2678,9:2687:99:0,7894,77914	0/0:1677,3:1680:99:0,4967,48616	0/0:1196,3:1199:99:0,3542,34724	0/1:428,89:517:99:2281,0,10740	0/1:218,82:300:99:2706,0,5382	0/1:316,137:453:99:4747,0,7639
2	102715331	rs317147662	2:102715331	5804.36	PASS	GT:AD:DP:GQ:PL	0/0:838,1:839:99:0,2478,28293	0/0:955,0:955:99:0,2865,31242	0/0:751,1:752:99:0,2211,24179	0/0:1333,1:1334:99:0,3954,42433	0/0:939,1:940:99:0,2774,31159	0/0:786,0:786:99:0,2350,26680	0/1:466,62:528:99:383,0,13449	0/1:327,120:447:99:2492,0,8771	0/1:342,137:479:99:2974,0,9525
2	102717202	rs14228287	2:102717202	6186.36	PASS	GT:AD:DP:GQ:PL	0/0:802,0:802:99:0,2417,26363	0/0:929,2:931:99:0,2800,30511	0/0:707,2:709:99:0,2119,22705	0/0:1301,1:1302:99:0,3915,42870	0/0:889,0:889:99:0,2690,29888	0/0:732,1:733:99:0,2203,24498	0/1:443,94:537:99:1050,0,12613	0/1:271,90:361:99:1440,0,7642	0/1:323,176:499:99:3741,0,8742
2	102719537	rs314665938	2:102719537	266400	PASS	GT:AD:DP:GQ:PL	1/1:4,1051:1055:99:31248,3048,0	1/1:4,1485:1489:99:43261,4348,0	1/1:2,978:980:99:28691,2887,0	1/1:3,1948:1951:99:58900,5810,0	1/1:1,1514:1515:99:46371,4516,0	1/1:2,996:998:99:30280,2967,0	0/1:89,482:571:99:12512,0,744	0/1:93,291:384:99:7122,0,1537	0/1:151,329:480:99:8060,0,2889
2	102720517	rs315518206	2:102720517	4391.36	PASS	GT:AD:DP:GQ:PL	0/0:1366,0:1366:99:0,4076,42745	0/0:1766,0:1766:99:0,5284,55277	0/0:1095,0:1095:99:0,3279,33305	0/0:2682,0:2682:99:0,7992,82549	0/0:1761,0:1761:99:0,5261,55124	0/0:1196,2:1198:99:0,3557,37106	0/1:561,69:630:68:68,0,14939	0/1:334,81:415:99:1122,0,9024	0/1:386,164:550:99:3246,0,10075
2	102721472	rs312290522	2:102721472	4681.36	PASS	GT:AD:DP:GQ:PL	0/0:615,0:615:99:0,1863,18935	0/0:709,0:709:99:0,2146,21331	0/0:593,0:593:99:0,1782,17729	0/0:760,0:760:99:0,2327,23366	0/0:651,0:651:99:0,1967,20408	0/0:571,0:571:99:0,1725,17791	0/1:465,64:529:99:188,0,12207	0/1:371,99:470:99:1361,0,8975	0/1:353,161:514:99:3177,0,8355
2	102721563	rs315911364	2:102721563	5121.36	PASS	GT:AD:DP:GQ:PL	0/0:1589,0:1589:99:0,4770,52033	0/0:2495,0:2495:99:0,7469,79744	0/0:1476,0:1476:99:0,4408,45768	0/0:3990,0:3990:99:0,11891,125118	0/0:2475,1:2476:99:0,7357,78709	0/0:1623,0:1623:99:0,4856,52150	0/1:602,102:704:99:705,0,17623	0/1:382,90:472:99:1049,0,10703	0/1:409,174:583:99:3412,0,11202
2	102726120	rs315439214	2:102726120	2833.36	PASS	GT:AD:DP:GQ:PL	0/0:715,0:715:99:0,2097,20214	0/0:832,1:833:99:0,2414,23122	0/0:628,0:628:99:0,1843,17881	0/0:1397,2:1399:99:0,4109,41714	0/0:900,0:900:99:0,2687,27162	0/0:773,0:773:99:0,2298,23026	0/1:418,64:482:99:504,0,10699	0/1:259,49:308:99:590,0,6691	0/1:278,98:376:99:1784,0,6936
2	102726197	rs734986915	2:102726197	447078	PASS	GT:AD:DP:GQ:PL	1/1:2,1478:1480:99:45408,4374,0	1/1:0,2331:2331:99:71443,6952,0	1/1:0,1327:1327:99:40690,3952,0	1/1:1,4068:4069:99:126943,12069,0	1/1:1,2426:2427:99:75908,7206,0	1/1:0,1716:1716:99:53449,5115,0	0/1:83,543:626:99:14808,0,483	0/1:60,327:387:99:8731,0,557	0/1:136,360:496:99:9743,0,2562
2	102727201	rs314516277	2:102727201	260106	PASS	GT:AD:DP:GQ:PL	1/1:0,860:860:99:28079,2582,0	1/1:1,1324:1325:99:42450,3930,0	1/1:1,848:849:99:26448,2538,0	1/1:0,2009:2009:99:65006,6027,0	1/1:0,1148:1148:99:38253,3475,0	1/1:0,961:961:99:31630,2884,0	0/1:82,430:512:99:11665,0,624	0/1:68,313:381:99:8303,0,749	0/1:153,321:474:99:8317,0,2830
2	102909180	rs313879566	2:102909180	7115.36	PASS	GT:AD:DP:GQ:PL	1/1:0,14:14:42:390,42,0	1/1:0,66:66:99:1771,194,0	1/1:0,37:37:99:991,110,0	1/1:0,47:47:99:1234,140,0	1/1:0,27:27:80:676,80,0	1/1:0,30:30:88:726,88,0	0/1:14,10:24:99:211,0,327	0/1:5,18:23:69:395,0,69	0/1:18,30:48:99:766,0,350
2	102909228	rs312295911	2:102909228	670.36	PASS	GT:AD:DP:GQ:PL	0/0:29,0:29:86:0,86,771	0/0:73,0:73:99:0,217,2073	0/0:50,0:50:99:0,148,1366	0/0:56,0:56:99:0,164,1477	0/0:31,0:31:92:0,92,917	0/0:29,0:29:86:0,86,725	0/1:13,11:24:99:285,0,333	0/1:18,4:22:58:58,0,521	0/1:33,18:51:99:372,0,721
2	102921264	rs313209053	2:102921264	9596.38	PASS	GT:AD:DP:GQ:PL	1/1:0,37:37:99:1159,111,0	1/1:0,76:76:99:2244,227,0	1/1:0,64:64:99:1822,191,0	1/1:0,57:57:99:1501,167,0	1/1:0,29:29:86:885,86,0	1/1:0,7:7:21:250,21,0	0/1:21,23:44:99:569,0,389	0/1:5,25:30:59:577,0,59	0/1:8,27:35:99:634,0,147
2	102959614	rs15137003	2:102959614	1731.36	PASS	GT:AD:DP:GQ:PL	0/0:239,0:239:99:0,725,11115	0/0:526,1:527:99:0,1598,24744	0/0:216,0:216:99:0,655,10022	0/0:518,1:519:99:0,1594,24543	0/0:506,0:506:99:0,1541,23443	0/0:432,0:432:99:0,1317,20275	0/1:64,21:85:99:710,0,2741	0/1:60,8:68:99:198,0,2505	0/1:72,27:99:99:868,0,3154
2	102959632	rs315495629	2:102959632	1800.36	PASS	GT:AD:DP:GQ:PL	0/0:258,0:258:99:0,781,11458	0/0:597,1:598:99:0,1806,26206	0/0:244,0:244:99:0,741,10693	0/0:688,2:690:99:0,2039,28667	0/0:564,0:564:99:0,1719,24950	0/0:499,0:499:99:0,1504,21890	0/1:71,24:95:99:741,0,2831	0/1:62,14:76:99:283,0,2516	0/1:78,26:104:99:821,0,3231
2	103049387	rs312889948	2:103049387	54339.4	PASS	GT:AD:DP:GQ:PL	1/1:0,154:154:99:4426,458,0	1/1:1,256:257:99:7279,755,0	1/1:0,110:110:99:2963,326,0	1/1:0,598:598:99:17052,1768,0	1/1:0,292:292:99:8329,867,0	1/1:0,224:224:99:6424,666,0	0/1:80,103:183:99:2284,0,1505	0/1:55,90:145:99:2025,0,1035	0/1:126,152:278:99:3602,0,2633
2	103051288	rs316092191	2:103051288	24839.4	PASS	GT:AD:DP:GQ:PL	1/1:0,87:87:99:2707,261,0	1/1:0,95:95:99:3099,285,0	1/1:0,66:66:99:1908,198,0	1/1:0,230:230:99:7173,688,0	1/1:1,127:128:99:3863,373,0	1/1:0,83:83:99:2615,248,0	0/1:27,51:78:99:1427,0,445	0/1:28,31:59:99:737,0,541	0/1:58,58:116:99:1355,0,1162
2	103051340	rs313806083	2:103051340	894.36	PASS	GT:AD:DP:GQ:PL	0/0:30,0:30:90:0,90,1034	0/0:33,0:33:99:0,99,1204	0/0:30,0:30:90:0,90,1032	0/0:83,0:83:99:0,247,2840	0/0:35,0:35:99:0,105,1251	0/0:28,0:28:84:0,84,1037	0/1:17,11:28:99:285,0,511	0/1:16,7:23:99:149,0,471	0/1:23,19:42:99:505,0,659
2	103164555	rs314092501	2:103164555	41408.4	PASS	GT:AD:DP:GQ:PL	1/1:0,99:99:99:4295,301,0	1/1:0,184:184:99:8120,563,0	1/1:0,51:51:99:2216,156,0	1/1:0,302:302:99:13100,925,0	1/1:0,148:148:99:6548,454,0	1/1:0,111:111:99:5066,358,0	1/1:0,19:19:57:832,57,0	1/1:0,9:9:27:378,27,0	1/1:0,20:20:60:878,60,0
2	103165769	rs314276838	2:103165769	18221.5	PASS	GT:AD:DP:GQ:PL	1/1:0,47:47:99:1493,141,0	1/1:0,95:95:99:2946,284,0	1/1:0,36:36:99:1053,107,0	1/1:0,229:229:99:7006,679,0	1/1:0,91:91:99:2724,270,0	1/1:0,69:69:99:2197,205,0	1/1:0,5:5:15:174,15,0	1/1:0,12:12:36:299,36,0	1/1:0,11:11:33:354,33,0
2	103166245	rs734141342	2:103166245	25205.5	PASS	GT:AD:DP:GQ:PL	1/1:0,74:74:99:2215,221,0	1/1:1,140:141:99:3954,410,0	1/1:0,43:43:99:1197,129,0	1/1:0,370:370:99:10530,1102,0	1/1:0,107:107:99:2897,319,0	1/1:0,113:113:99:3289,337,0	1/1:0,23:23:69:711,69,0	1/1:0,10:10:30:265,30,0	1/1:0,6:6:18:172,18,0
2	103166589	rs740774778	2:103166589	27660.5	PASS	GT:AD:DP:GQ:PL	1/1:0,57:57:99:1804,170,0	1/1:0,132:132:99:4320,396,0	1/1:0,40:40:99:1237,120,0	1/1:2,404:406:99:12155,1124,0	1/1:0,113:113:99:3391,337,0	1/1:0,133:133:99:4062,396,0	1/1:0,10:10:30:321,30,0	1/1:0,5:5:15:129,15,0	1/1:0,10:10:30:266,30,0
2	103166618	rs731945096	2:103166618	24606.5	PASS	GT:AD:DP:GQ:PL	1/1:0,55:55:99:1622,165,0	1/1:0,128:128:99:4012,382,0	1/1:0,44:44:99:1382,132,0	1/1:2,356:358:99:10520,1026,0	1/1:0,99:99:99:2973,304,0	1/1:3,114:117:99:3198,270,0	1/1:0,15:15:45:430,45,0	1/1:0,6:6:18:158,18,0	1/1:0,12:12:36:336,36,0
2	110069567	rs732964557	2:110069567	1320.47	PASS	GT:AD:DP:GQ:PL	0/0:1,0:1:3:0,3,37	0/0:24,0:24:72:0,72,669	0/0:16,0:16:48:0,48,437	0/0:23,0:23:69:0,69,684	0/0:14,0:14:42:0,42,365	0/0:5,0:5:15:0,15,140	0/1:16,15:31:99:316,0,426	0/1:11,18:29:99:358,0,195	0/1:45,33:78:99:690,0,1054
2	110069701	rs738650839	2:110069701	1450.39	PASS	GT:AD:DP:GQ:PL	0/0:7,0:7:21:0,21,240	0/0:21,0:21:61:0,61,555	0/0:8,0:8:23:0,23,218	0/0:22,0:22:65:0,65,551	0/0:12,0:12:36:0,36,393	0/0:15,0:15:44:0,44,380	0/1:15,10:25:99:360,0,343	0/1:8,16:24:99:659,0,108	0/1:36,23:59:99:476,0,886
2	110070091	rs735474644	2:110070091	1070.37	PASS	GT:AD:DP:GQ:PL	0/0:12,0:12:36:0,36,365	0/0:23,0:23:68:0,68,578	0/0:10,0:10:29:0,29,240	0/0:28,0:28:83:0,83,702	0/0:18,0:18:54:0,54,481	0/0:12,0:12:36:0,36,299	0/1:9,10:19:99:286,0,174	0/1:9,14:23:99:273,0,162	0/1:35,28:63:99:556,0,705
2	110872706	rs80568154	2:110872706	848.36	PASS	GT:AD:DP:GQ:PL	0/0:78,0:78:99:0,232,2333	0/0:102,0:102:99:0,304,2906	0/0:50,0:50:99:0,149,1458	0/0:303,0:303:99:0,901,8463	0/0:141,0:141:99:0,417,3959	0/0:115,0:115:99:0,343,3369	0/1:45,13:58:99:221,0,1124	0/1:29,7:36:99:142,0,738	0/1:37,23:60:99:530,0,828
2	110877422	rs734633313	2:110877422	1442.36	PASS	GT:AD:DP:GQ:PL	0/0:88,0:88:99:0,262,2530	0/0:131,0:131:99:0,390,3615	0/0:40,0:40:99:0,119,1095	0/0:325,0:325:99:0,961,8676	0/0:177,0:177:99:0,524,4944	0/0:117,0:117:99:0,348,3387	0/1:39,16:55:99:240,0,1012	0/1:16,16:32:99:326,0,331	0/1:37,37:74:99:921,0,855
2	110877701	rs732134836	2:110877701	1574.36	PASS	GT:AD:DP:GQ:PL	0/0:71,0:71:99:0,214,3136	0/0:75,0:75:99:0,225,3298	0/0:40,0:40:99:0,120,1723	0/0:210,0:210:99:0,631,8966	0/0:139,0:139:99:0,418,6045	0/0:98,0:98:99:0,295,4312	0/1:19,11:30:99:405,0,736	0/1:6,10:16:99:402,0,222	0/1:18,21:39:99:812,0,688
2	110877704	rs735491848	2:110877704	1574.36	PASS	GT:AD:DP:GQ:PL	0/0:71,0:71:99:0,214,3136	0/0:74,0:74:99:0,225,3298	0/0:39,0:39:99:0,120,1723	0/0:204,0:204:99:0,628,8932	0/0:138,0:138:99:0,418,6045	0/0:98,0:98:99:0,295,4312	0/1:18,11:29:99:405,0,736	0/1:6,10:16:99:402,0,222	0/1:18,21:39:99:812,0,688
2	110877741	rs740206617	2:110877741	22014.4	PASS	GT:AD:DP:GQ:PL	1/1:0,60:60:99:2749,187,0	1/1:0,59:59:99:2652,184,0	1/1:0,17:17:54:793,54,0	1/1:0,136:136:99:6114,415,0	1/1:0,107:107:99:4906,334,0	1/1:0,75:75:99:3357,231,0	0/1:9,13:22:99:518,0,339	0/1:11,8:19:99:334,0,435	0/1:12,16:28:99:636,0,456
2	110877746	rs732699961	2:110877746	22156.4	PASS	GT:AD:DP:GQ:PL	1/1:0,61:61:99:2794,190,0	1/1:0,58:58:99:2652,184,0	1/1:0,18:18:54:793,54,0	1/1:0,138:138:99:6204,421,0	1/1:0,109:109:99:4881,331,0	1/1:0,75:75:99:3392,232,0	0/1:9,13:22:99:518,0,339	0/1:11,9:20:99:334,0,435	0/1:13,16:29:99:633,0,498
2	110877768	rs29007045	2:110877768	20262.4	PASS	GT:AD:DP:GQ:PL	1/1:0,56:56:99:2515,172,0	1/1:0,49:49:99:2263,157,0	1/1:0,15:15:48:686,48,0	1/1:0,131:131:99:6020,418,0	1/1:0,94:94:99:4442,304,0	1/1:0,70:70:99:3179,220,0	0/1:7,13:20:99:525,0,252	0/1:12,6:18:99:216,0,477	0/1:10,11:21:99:461,0,384
2	110878134	rs316458738	2:110878134	24215.4	PASS	GT:AD:DP:GQ:PL	1/1:0,84:84:99:2412,251,0	1/1:0,116:116:99:3353,346,0	1/1:0,42:42:99:1169,125,0	1/1:0,304:304:99:8565,907,0	1/1:0,145:145:99:4175,432,0	1/1:0,97:97:99:2894,289,0	0/1:14,25:39:99:599,0,474	0/1:13,15:28:99:366,0,235	0/1:34,33:67:99:727,0,786
2	110921720	rs16103954	2:110921720	38451.4	PASS	GT:AD:DP:GQ:PL	1/1:0,88:88:99:2647,263,0	1/1:0,194:194:99:7457,603,0	1/1:0,54:54:99:1606,160,0	1/1:2,385:387:99:14637,1186,0	1/1:0,175:175:99:5642,535,0	1/1:0,156:156:99:4967,474,0	1/1:0,16:16:48:506,48,0	1/1:0,17:17:54:563,54,0	1/1:0,13:13:39:451,39,0
2	110921879	rs80660127	2:110921879	39067.4	PASS	GT:AD:DP:GQ:PL	1/1:0,101:101:99:3147,302,0	1/1:1,206:207:99:6400,597,0	1/1:0,52:52:99:1575,158,0	1/1:0,482:482:99:14491,1455,0	1/1:1,174:175:99:5643,489,0	1/1:0,184:184:99:5929,551,0	1/1:0,29:29:87:953,87,0	1/1:1,21:22:33:622,33,0	1/1:0,11:11:33:332,33,0
2	113033839	rs734326375	2:113033839	28537.4	PASS	GT:AD:DP:GQ:PL	1/1:1,60:61:99:1746,147,0	1/1:0,202:202:99:5692,600,0	1/1:0,113:113:99:3215,337,0	1/1:2,271:273:99:7480,759,0	1/1:0,95:95:99:2795,282,0	1/1:0,88:88:99:2518,262,0	0/1:45,49:94:99:1113,0,1721	0/1:36,60:96:99:1361,0,765	0/1:80,108:188:99:2662,0,1786
2	113066775	.	2:113066775	35230.4	PASS	GT:AD:DP:GQ:PL	1/1:0,103:103:99:2951,306,0	1/1:0,173:173:99:4896,517,0	1/1:0,117:117:99:3357,349,0	1/1:0,338:338:99:9299,1000,0	1/1:0,191:191:99:5559,567,0	1/1:0,107:107:99:3135,319,0	0/1:47,87:134:99:2136,0,914	0/1:48,67:115:99:1485,0,933	0/1:78,106:184:99:2457,0,1672
2	114892825	rs10728366	2:114892825	17535.4	PASS	GT:AD:DP:GQ:PL	1/1:0,76:76:99:2132,226,0	1/1:0,197:197:99:5484,587,0	1/1:0,88:88:99:2399,262,0	1/1:0,112:112:99:3040,332,0	1/1:0,49:49:99:1432,147,0	1/1:0,36:36:99:1007,107,0	0/1:21,18:39:99:391,0,506	0/1:16,22:38:99:502,0,300	0/1:47,52:99:99:1193,0,1010
2	114893536	rs738122248	2:114893536	22884.4	PASS	GT:AD:DP:GQ:PL	1/1:0,70:70:99:2613,209,0	1/1:0,181:181:99:6741,550,0	1/1:0,74:74:99:3139,226,0	1/1:0,124:124:99:4240,373,0	1/1:0,52:52:99:1780,159,0	1/1:0,42:42:99:1770,126,0	0/1:21,22:43:99:801,0,832	0/1:12,22:34:99:790,0,246	0/1:36,41:77:99:1055,0,1453
2	115050472	rs316669858	2:115050472	66633.4	PASS	GT:AD:DP:GQ:PL	1/1:0,156:156:99:4701,467,0	1/1:0,386:386:99:10981,1158,0	1/1:0,134:134:99:3762,400,0	1/1:1,822:823:99:24006,2444,0	1/1:0,376:376:99:10779,1130,0	1/1:0,297:297:99:8538,893,0	0/1:15,70:85:99:1737,0,209	0/1:15,36:51:99:864,0,294	0/1:47,59:106:99:1310,0,977
2	115051856	rs314867038	2:115051856	65969.4	PASS	GT:AD:DP:GQ:PL	1/1:0,240:240:99:6830,716,0	1/1:0,368:368:99:10487,1100,0	1/1:0,120:120:99:3430,357,0	1/1:0,801:801:99:22865,2396,0	1/1:0,348:348:99:10290,1041,0	1/1:0,266:266:99:7664,795,0	0/1:17,63:80:99:1633,0,204	0/1:29,35:64:99:730,0,613	0/1:62,84:146:99:2085,0,1300
2	115053169	rs317314649	2:115053169	1861.36	PASS	GT:AD:DP:GQ:PL	0/0:221,0:221:99:0,662,7261	0/0:391,0:391:99:0,1168,12596	0/0:145,0:145:99:0,436,4656	0/0:813,3:816:99:0,2349,25613	0/0:405,3:408:99:0,1187,13153	0/0:328,0:328:99:0,979,9844	0/1:63,26:89:99:518,0,1715	0/1:51,19:70:99:371,0,1329	0/1:79,47:126:99:1017,0,2110
2	115072794	rs737251981	2:115072794	53921.4	PASS	GT:AD:DP:GQ:PL	1/1:0,145:145:99:4238,432,0	1/1:0,378:378:99:11114,1126,0	1/1:0,83:83:99:2480,248,0	1/1:0,520:520:99:15466,1536,0	1/1:0,333:333:99:9736,992,0	1/1:0,279:279:99:7963,829,0	0/1:8,34:42:99:853,0,144	0/1:15,40:55:99:905,0,244	0/1:27,50:77:99:1211,0,588
2	115079757	rs15145313	2:115079757	40257.4	PASS	GT:AD:DP:GQ:PL	1/1:0,94:94:99:3125,281,0	1/1:0,169:169:99:7003,517,0	1/1:0,75:75:99:3140,225,0	1/1:0,394:394:99:13710,1176,0	1/1:0,130:130:99:4202,387,0	1/1:0,168:168:99:6642,509,0	0/1:8,23:31:99:770,0,123	0/1:6,11:17:99:384,0,114	0/1:24,37:61:99:1326,0,528
2	115080002	rs16110013	2:115080002	46807.4	PASS	GT:AD:DP:GQ:PL	1/1:0,119:119:99:4346,356,0	1/1:0,197:197:99:5639,589,0	1/1:0,61:61:99:2622,183,0	1/1:1,552:553:99:16202,1644,0	1/1:0,197:197:99:7369,596,0	1/1:0,192:192:99:8145,579,0	0/1:9,26:35:99:903,0,137	0/1:4,19:23:72:749,0,72	0/1:18,34:52:99:877,0,344
2	115080249	rs740302795	2:115080249	35277.4	PASS	GT:AD:DP:GQ:PL	1/1:0,104:104:99:2815,309,0	1/1:0,225:225:99:6225,672,0	1/1:0,66:66:99:1766,197,0	1/1:1,477:478:99:12850,1391,0	1/1:0,219:219:99:6180,653,0	1/1:0,122:122:99:3471,362,0	0/1:6,25:31:70:526,0,70	0/1:11,17:28:99:362,0,206	0/1:17,47:64:99:1127,0,267
2	115080411	rs317635118	2:115080411	405.36	PASS	GT:AD:DP:GQ:PL	0/0:112,0:112:99:0,327,2739	0/0:224,2:226:99:0,623,6223	0/0:60,0:60:99:0,176,1553	0/0:517,0:517:99:0,1505,12608	0/0:191,0:191:99:0,561,4955	0/0:151,0:151:99:0,442,3918	0/1:25,8:33:87:87,0,465	0/1:20,6:26:96:96,0,473	0/1:45,16:61:99:267,0,1071
2	117439205	rs10728700	2:117439205	4112.45	PASS	GT:AD:DP:GQ:PL	1/1:0,8:8:24:242,24,0	1/1:0,30:30:89:810,89,0	1/1:0,5:5:15:156,15,0	1/1:0,32:32:94:843,94,0	1/1:0,10:10:30:258,30,0	1/1:0,10:10:30:258,30,0	0/1:8,19:27:99:454,0,139	0/1:5,22:27:73:558,0,73	0/1:20,22:42:99:578,0,455
2	117439668	rs317794963	2:117439668	3603.93	PASS	GT:AD:DP:GQ:PL	1/1:0,12:12:36:317,36,0	1/1:0,29:29:87:777,87,0	1/1:0,7:7:21:185,21,0	1/1:0,24:24:72:672,72,0	1/1:0,10:10:30:264,30,0	1/1:0,2:2:6:72,6,0	0/1:12,17:29:99:338,0,225	0/1:10,23:33:99:525,0,146	0/1:16,22:38:99:498,0,332
2	125864341	rs314958243	2:125864341	1405.36	PASS	GT:AD:DP:GQ:PL	0/0:126,0:126:99:0,373,3544	0/0:193,1:194:99:0,539,5308	0/0:77,0:77:99:0,229,2268	0/0:597,0:597:99:0,1782,17422	0/0:300,1:301:99:0,861,9013	0/0:184,2:186:99:0,503,5367	0/1:42,19:61:99:304,0,913	0/1:33,12:45:99:258,0,803	0/1:62,42:104:99:888,0,1331
2	125864397	rs313056451	2:125864397	1002.36	PASS	GT:AD:DP:GQ:PL	0/0:93,0:93:99:0,280,2699	0/0:136,0:136:99:0,406,3830	0/0:67,0:67:99:0,199,1810	0/0:395,0:395:99:0,1168,10888	0/0:257,0:257:99:0,767,7161	0/0:125,0:125:99:0,373,3571	0/1:31,13:44:99:259,0,742	0/1:26,12:38:99:195,0,545	0/1:50,30:80:99:593,0,1096
2	125914195	rs16133550	2:125914195	5213.36	PASS	GT:AD:DP:GQ:PL	0/0:225,0:225:99:0,680,8135	0/0:449,0:449:99:0,1342,13208	0/0:207,0:207:99:0,631,7062	0/0:628,1:629:99:0,1837,19303	0/0:414,0:414:99:0,1249,14454	0/0:406,0:406:99:0,1222,14197	0/1:71,52:123:99:1146,0,1783	0/1:80,59:139:99:1187,0,2111	0/1:102,124:226:99:2925,0,2305
2	125917178	rs315971202	2:125917178	44467.4	PASS	GT:AD:DP:GQ:PL	1/1:0,132:132:99:3586,395,0	1/1:0,273:273:99:7563,817,0	1/1:0,110:110:99:2926,327,0	1/1:1,550:551:99:14593,1612,0	1/1:0,257:257:99:7048,771,0	1/1:0,195:195:99:5252,584,0	0/1:44,77:121:99:1653,0,911	0/1:28,31:59:99:630,0,618	0/1:73,63:136:99:1261,0,1808
2	126118398	rs316807163	2:126118398	4908.4	PASS	GT:AD:DP:GQ:PL	1/1:0,10:10:30:281,30,0	1/1:0,24:24:72:724,72,0	1/1:0,1:1:3:36,3,0	1/1:0,64:64:99:1685,189,0	1/1:0,25:25:74:655,74,0	1/1:0,22:22:66:605,66,0	0/1:4,9:13:75:265,0,75	0/1:4,5:9:89:121,0,89	0/1:13,23:36:99:580,0,258
2	126120862	rs737645029	2:126120862	4445.38	PASS	GT:AD:DP:GQ:PL	1/1:0,16:16:48:486,48,0	1/1:0,11:11:33:375,33,0	1/1:0,7:7:21:224,21,0	1/1:0,36:36:99:1219,108,0	1/1:0,19:19:57:586,57,0	1/1:0,19:19:56:536,56,0	0/1:6,10:16:99:262,0,171	0/1:6,15:21:96:404,0,96	0/1:7,14:21:99:398,0,156
2	126121576	rs316794996	2:126121576	3794.89	PASS	GT:AD:DP:GQ:PL	1/1:0,11:11:33:304,33,0	1/1:0,18:18:54:533,54,0	1/1:0,3:3:9:68,9,0	1/1:0,30:30:89:801,89,0	1/1:0,23:23:69:638,69,0	1/1:0,10:10:30:282,30,0	0/1:4,9:13:60:218,0,60	0/1:1,9:10:9:244,0,9	0/1:8,32:40:99:750,0,111
2	126125517	rs312446570	2:126125517	5854.51	PASS	GT:AD:DP:GQ:PL	1/1:0,20:20:60:587,60,0	1/1:0,21:21:63:585,63,0	1/1:0,9:9:27:260,27,0	1/1:0,34:34:99:936,101,0	1/1:0,40:40:99:1072,119,0	1/1:0,28:28:83:735,83,0	0/1:4,17:21:19:440,0,19	0/1:5,17:22:80:396,0,80	0/1:18,38:56:99:888,0,390
2	126125647	rs313219018	2:126125647	5349.51	PASS	GT:AD:DP:GQ:PL	1/1:0,17:17:50:460,50,0	1/1:0,16:16:48:491,48,0	1/1:0,4:4:12:113,12,0	1/1:0,38:38:99:1033,113,0	1/1:0,40:40:99:1217,120,0	1/1:0,21:21:63:676,63,0	0/1:7,18:25:99:478,0,173	0/1:9,7:16:99:171,0,253	0/1:18,27:45:99:755,0,379
2	126138136	rs312996158	2:126138136	6054.36	PASS	GT:AD:DP:GQ:PL	0/0:133,0:133:99:0,393,3522	0/0:347,0:347:99:0,1035,9307	0/0:149,0:149:99:0,442,3919	0/0:640,0:640:99:0,1894,16989	0/0:303,0:303:99:0,898,8100	0/0:242,0:242:99:0,717,6393	0/1:115,91:206:99:1843,0,2326	0/1:110,67:177:99:1359,0,2387	0/1:204,143:347:99:2897,0,4551
2	126151162	rs10721727	2:126151162	31551.4	PASS	GT:AD:DP:GQ:PL	1/1:0,78:78:99:2014,229,0	1/1:0,187:187:99:4958,553,0	1/1:0,92:92:99:2320,270,0	1/1:1,323:324:99:8829,948,0	1/1:0,128:128:99:3584,379,0	1/1:0,155:155:99:4250,459,0	0/1:60,61:121:99:1296,0,1240	0/1:28,90:118:99:1966,0,248	0/1:76,113:189:99:2379,0,1579
2	126151876	rs314855887	2:126151876	27516.4	PASS	GT:AD:DP:GQ:PL	1/1:0,38:38:99:1236,114,0	1/1:0,59:59:99:1616,176,0	1/1:0,25:25:75:789,75,0	1/1:0,106:106:99:3090,314,0	1/1:0,64:64:99:1820,191,0	1/1:0,62:62:99:1836,185,0	0/1:304,258:562:99:5672,0,6812	0/1:171,219:390:99:4955,0,3509	0/1:373,298:671:99:6547,0,8331
2	126152920	rs314483668	2:126152920	16696.4	PASS	GT:AD:DP:GQ:PL	0/0:34,0:34:99:0,102,1016	0/0:73,0:73:99:0,218,2218	0/0:30,0:30:90:0,90,900	0/0:163,1:164:99:0,477,4821	0/0:69,0:69:99:0,206,2051	0/0:91,0:91:99:0,272,2843	0/1:190,265:455:99:6011,0,4484	0/1:190,218:408:99:4639,0,4784	0/1:247,258:505:99:6091,0,6442
2	127293947	rs80766294	2:127293947	9516.38	PASS	GT:AD:DP:GQ:PL	0/0:10,0:10:30:0,30,307	0/0:34,0:34:99:0,101,950	0/0:9,0:9:27:0,27,309	0/0:18,0:18:54:0,54,586	0/0:15,0:15:45:0,45,427	0/0:9,0:9:27:0,27,306	0/1:131,138:269:99:3175,0,3052	0/1:119,82:201:99:2925,0,2737	0/1:176,101:277:99:3461,0,4344
2	127294163	rs80649623	2:127294163	8457.93	PASS	GT:AD:DP:GQ:PL	0/0:21,0:21:63:0,63,571	0/0:23,0:23:68:0,68,663	0/0:13,1:14:31:0,31,345	0/0:22,0:22:65:0,65,585	0/0:7,0:7:21:0,21,184	0/0:2,0:2:6:0,6,49	0/1:64,98:162:99:2343,0,1464	0/1:59,71:130:99:2644,0,1353	0/1:110,95:205:99:3515,0,2530
2	127294632	rs315434416	2:127294632	3937.68	PASS	GT:AD:DP:GQ:PL	0/0:7,0:7:21:0,21,206	0/0:18,0:18:54:0,54,573	0/0:9,0:9:27:0,27,254	0/0:19,0:19:57:0,57,552	0/0:8,0:8:24:0,24,261	0/0:3,0:3:9:0,9,103	0/1:68,58:126:99:1391,0,1515	0/1:73,53:126:99:1195,0,1726	0/1:69,60:129:99:1396,0,1648
3	3070526	rs16215467	3:3070526	1445.36	PASS	GT:AD:DP:GQ:PL	0/0:57,0:57:99:0,170,1484	0/0:145,0:145:99:0,434,4058	0/0:63,0:63:99:0,189,1702	0/0:307,0:307:99:0,914,8552	0/0:88,0:88:99:0,262,2534	0/0:149,0:149:99:0,441,4094	0/1:21,21:42:99:485,0,460	0/1:10,15:25:99:323,0,216	0/1:27,30:57:99:682,0,515
3	3070651	rs16215470	3:3070651	561.36	PASS	GT:AD:DP:GQ:PL	0/0:41,0:41:99:0,122,1116	0/0:77,0:77:99:0,233,2668	0/0:26,0:26:78:0,78,979	0/0:129,0:129:99:0,384,4289	0/0:68,0:68:99:0,201,1953	0/0:59,0:59:99:0,180,1966	0/1:18,7:25:99:104,0,498	0/1:16,5:21:55:55,0,469	0/1:5,18:23:99:447,0,198
3	3070678	rs737739243	3:3070678	516.36	PASS	GT:AD:DP:GQ:PL	0/0:38,0:38:99:0,114,1649	0/0:75,0:75:99:0,229,3389	0/0:26,0:26:78:0,78,1127	0/0:126,0:126:99:0,379,5607	0/0:65,0:65:99:0,196,2845	0/0:58,0:58:99:0,184,2728	0/1:21,5:26:99:119,0,867	0/1:15,4:19:68:68,0,548	0/1:4,11:15:99:374,0,135
3	3071074	rs735608908	3:3071074	1207.36	PASS	GT:AD:DP:GQ:PL	0/0:45,0:45:99:0,138,1923	0/0:118,0:118:99:0,354,3946	0/0:46,0:46:99:0,141,1650	0/0:230,0:230:99:0,694,8007	0/0:96,0:96:99:0,292,3878	0/0:119,0:119:99:0,363,4252	0/1:24,18:42:99:369,0,952	0/1:23,11:34:99:211,0,880	0/1:28,30:58:99:672,0,632
3	3092961	rs314078837	3:3092961	5309.36	PASS	GT:AD:DP:GQ:PL	0/0:161,0:161:99:0,477,4615	0/0:301,0:301:99:0,900,8943	0/0:97,0:97:99:0,286,2616	0/0:548,0:548:99:0,1624,15535	0/0:293,0:293:99:0,871,8212	0/0:199,1:200:99:0,570,5638	0/1:122,75:197:99:1451,0,2723	0/1:82,55:137:99:1040,0,2082	0/1:154,131:285:99:2863,0,3655
3	3099130	rs313198183	3:3099130	6284.36	PASS	GT:AD:DP:GQ:PL	0/0:152,0:152:99:0,455,4841	0/0:301,0:301:99:0,899,9404	0/0:92,0:92:99:0,274,2860	0/0:522,0:522:99:0,1553,15993	0/0:255,2:257:99:0,717,8036	0/0:203,0:203:99:0,605,6338	0/1:108,74:182:99:1885,0,2849	0/1:93,61:154:99:1340,0,2271	0/1:142,123:265:99:3104,0,3612
3	3112758	rs741023657	3:3112758	5583.36	PASS	GT:AD:DP:GQ:PL	0/0:175,0:175:99:0,517,4905	0/0:344,2:346:99:0,979,9352	0/0:142,0:142:99:0,419,3789	0/0:580,0:580:99:0,1716,15432	0/0:348,4:352:99:0,942,9203	0/0:262,0:262:99:0,782,7077	0/1:148,68:216:99:1537,0,3525	0/1:106,53:159:99:1099,0,2385	0/1:157,132:289:99:2992,0,3433
3	3130988	rs733335103	3:3130988	12407.4	PASS	GT:AD:DP:GQ:PL	1/1:0,16:16:45:312,45,0	1/1:0,47:47:99:1702,140,0	1/1:0,18:18:54:657,54,0	1/1:0,145:145:99:4616,430,0	1/1:0,53:53:99:1331,155,0	1/1:0,46:46:99:1400,134,0	0/1:12,29:41:99:584,0,250	0/1:22,29:51:99:661,0,464	0/1:26,34:60:99:1189,0,536
3	3134270	rs737748176	3:3134270	11797.4	PASS	GT:AD:DP:GQ:PL	1/1:0,23:23:69:679,69,0	1/1:0,59:59:99:1659,176,0	1/1:0,23:23:69:653,69,0	1/1:0,119:119:99:3457,353,0	1/1:0,49:49:99:1397,147,0	1/1:0,52:52:99:1398,155,0	0/1:21,31:52:99:632,0,397	0/1:33,35:68:99:783,0,683	0/1:37,53:90:99:1184,0,688
3	3134392	rs731588356	3:3134392	6478.36	PASS	GT:AD:DP:GQ:PL	0/0:53,0:53:99:0,165,2291	0/0:113,0:113:99:0,352,4864	0/0:43,0:43:99:0,132,1784	0/0:261,0:261:99:0,794,10683	0/0:100,0:100:99:0,304,4256	0/0:126,0:126:99:0,378,5342	0/1:79,53:132:99:1959,0,2930	0/1:69,59:128:99:2069,0,2534	0/1:85,69:154:99:2495,0,3147
3	3134413	rs316183282	3:3134413	6392.36	PASS	GT:AD:DP:GQ:PL	0/0:57,0:57:99:0,171,2363	0/0:109,0:109:99:0,337,4733	0/0:39,0:39:99:0,119,1623	0/0:246,0:246:99:0,763,10466	0/0:97,0:97:99:0,292,4160	0/0:119,0:119:99:0,360,5169	0/1:79,55:134:99:1971,0,2906	0/1:63,58:121:99:2087,0,2436	0/1:78,64:142:99:2379,0,3051
3	3134439	rs739061513	3:3134439	3534.36	PASS	GT:AD:DP:GQ:PL	0/0:60,0:60:99:0,182,1755	0/0:112,0:112:99:0,335,3298	0/0:42,0:42:99:0,126,1251	0/0:265,0:265:99:0,788,7488	0/0:115,0:115:99:0,343,3398	0/0:122,0:122:99:0,363,3284	0/1:84,55:139:99:1065,0,1901	0/1:71,50:121:99:966,0,1656	0/1:81,74:155:99:1548,0,1985
3	3134560	rs731492468	3:3134560	4110.36	PASS	GT:AD:DP:GQ:PL	0/0:67,0:67:99:0,203,2020	0/0:108,0:108:99:0,322,3210	0/0:43,0:43:99:0,129,1340	0/0:333,0:333:99:0,989,9523	0/0:134,0:134:99:0,398,3791	0/0:118,0:118:99:0,351,3614	0/1:86,53:139:99:1049,0,2051	0/1:62,47:109:99:929,0,1556	0/1:96,95:191:99:2177,0,2384
3	3134603	rs312736352	3:3134603	4092.36	PASS	GT:AD:DP:GQ:PL	0/0:61,0:61:99:0,181,1689	0/0:113,0:113:99:0,336,3229	0/0:50,0:50:99:0,150,1537	0/0:328,0:328:99:0,970,8706	0/0:130,0:130:99:0,386,3571	0/0:117,0:117:99:0,347,3218	0/1:74,51:125:99:1081,0,1611	0/1:61,49:110:99:959,0,1351	0/1:83,91:174:99:2097,0,1858
3	3669659	rs316446653	3:3669659	1267.36	PASS	GT:AD:DP:GQ:PL	0/0:33,0:33:98:0,98,945	0/0:60,0:60:99:0,179,1719	0/0:13,0:13:39:0,39,370	0/0:89,0:89:99:0,264,2584	0/0:31,0:31:92:0,92,899	0/0:44,0:44:99:0,130,1252	0/1:23,15:38:99:331,0,560	0/1:24,12:36:99:234,0,481	0/1:43,36:79:99:747,0,995
3	3671881	rs313342597	3:3671881	2039.36	PASS	GT:AD:DP:GQ:PL	0/0:27,0:27:81:0,81,1201	0/0:36,0:36:99:0,114,1648	0/0:13,0:13:39:0,39,554	0/0:68,0:68:99:0,205,2931	0/0:35,0:35:99:0,108,1541	0/0:27,0:27:84:0,84,1207	0/1:18,8:26:99:270,0,684	0/1:14,15:29:99:561,0,527	0/1:39,32:71:99:1253,0,1507
3	3671885	rs732532383	3:3671885	2045.36	PASS	GT:AD:DP:GQ:PL	0/0:26,0:26:81:0,81,1201	0/0:38,0:38:99:0,114,1648	0/0:13,0:13:39:0,39,554	0/0:67,0:67:99:0,208,2965	0/0:35,0:35:99:0,108,1541	0/0:27,0:27:81:0,81,1171	0/1:17,7:24:99:270,0,684	0/1:13,15:28:99:561,0,527	0/1:37,34:71:99:1259,0,1444
3	3673496	rs315641547	3:3673496	1149.36	PASS	GT:AD:DP:GQ:PL	0/0:38,0:38:99:0,113,1068	0/0:63,0:63:99:0,188,1746	0/0:28,0:28:84:0,84,751	0/0:125,0:125:99:0,367,3384	0/0:51,0:51:99:0,153,1416	0/0:35,0:35:99:0,104,929	0/1:20,7:27:95:95,0,458	0/1:27,16:43:99:283,0,625	0/1:44,40:84:99:816,0,1041
3	3683836	rs312353617	3:3683836	1627.51	PASS	GT:AD:DP:GQ:PL	0/0:30,0:30:93:0,93,1554	0/0:27,0:27:81:0,81,1348	0/0:13,0:13:45:0,45,777	0/0:16,0:16:54:0,54,796	0/0:38,0:38:99:0,114,1903	0/0:4,0:4:12:0,12,188	0/1:11,13:24:99:501,0,473	0/1:12,10:22:99:398,0,590	0/1:14,21:35:99:773,0,740
3	3683859	rs315015331	3:3683859	1877.51	PASS	GT:AD:DP:GQ:PL	0/0:33,0:33:99:0,102,1663	0/0:29,0:29:95:0,95,1466	0/0:17,0:17:51:0,51,836	0/0:17,0:17:54:0,54,807	0/0:44,0:44:99:0,132,2113	0/0:4,0:4:12:0,12,173	0/1:14,16:30:99:604,0,533	0/1:13,14:27:99:470,0,612	0/1:16,23:39:99:848,0,746
3	3694318	rs312339236	3:3694318	1027.37	PASS	GT:AD:DP:GQ:PL	0/0:9,0:9:27:0,27,256	0/0:20,0:20:60:0,60,601	0/0:14,0:14:42:0,42,441	0/0:24,0:24:72:0,72,751	0/0:26,0:26:78:0,78,720	0/0:13,0:13:39:0,39,392	0/1:18,10:28:99:244,0,445	0/1:5,11:16:85:267,0,85	0/1:16,22:38:99:561,0,398
3	3714177	rs16216306	3:3714177	679.37	PASS	GT:AD:DP:GQ:PL	0/0:15,0:15:45:0,45,394	0/0:12,0:12:36:0,36,359	0/0:11,0:11:33:0,33,297	0/0:16,0:16:48:0,48,475	0/0:12,0:12:36:0,36,364	0/0:11,0:11:33:0,33,297	0/1:7,11:18:99:264,0,149	0/1:9,7:16:99:184,0,201	0/1:22,10:32:99:276,0,515
3	8517428	rs316515279	3:8517428	29996.4	PASS	GT:AD:DP:GQ:PL	1/1:0,97:97:99:2742,288,0	1/1:0,61:61:99:1878,181,0	1/1:0,64:64:99:1832,191,0	1/1:0,425:425:99:11548,1260,0	1/1:0,197:197:99:5409,583,0	1/1:0,145:145:99:4257,433,0	0/1:47,11:58:99:176,0,1119	0/1:53,70:123:99:1659,0,1089	0/1:111,32:143:99:540,0,2739
3	8519539	rs16224033	3:8519539	4642.05	PASS	GT:AD:DP:GQ:PL	1/1:1,15:16:20:442,20,0	1/1:0,23:23:69:665,69,0	1/1:0,8:8:23:174,23,0	1/1:0,54:54:99:1517,159,0	1/1:0,20:20:60:620,60,0	1/1:0,20:20:63:646,63,0	0/1:4,4:8:66:94,0,66	0/1:1,10:11:5:201,0,5	0/1:20,15:35:99:325,0,432
3	8522718	rs312371413	3:8522718	6111.36	PASS	GT:AD:DP:GQ:PL	1/1:0,17:17:51:718,51,0	1/1:0,20:20:60:776,60,0	1/1:0,11:11:33:406,33,0	1/1:0,39:39:99:1578,120,0	1/1:0,29:29:87:1107,87,0	1/1:0,25:25:75:1041,75,0	0/1:6,7:13:99:238,0,238	0/1:3,4:7:99:150,0,111	0/1:8,5:13:99:142,0,320
3	8522742	rs314605407	3:8522742	5489.38	PASS	GT:AD:DP:GQ:PL	1/1:0,15:15:45:644,45,0	1/1:0,16:16:48:666,48,0	1/1:0,7:7:21:278,21,0	1/1:0,35:35:99:1444,105,0	1/1:0,24:24:72:982,72,0	1/1:0,23:23:69:1015,69,0	0/1:5,7:12:99:224,0,203	0/1:2,4:6:84:142,0,84	0/1:7,4:11:99:139,0,301
3	11751885	rs317787665	3:11751885	7963.36	PASS	GT:AD:DP:GQ:PL	0/0:30,0:30:90:0,90,978	0/0:83,0:83:99:0,248,2557	0/0:51,0:51:99:0,153,1524	0/0:94,0:94:99:0,280,2836	0/0:32,0:32:96:0,96,966	0/0:22,0:22:66:0,66,710	0/1:104,97:201:99:1830,0,2620	0/1:109,104:213:99:2185,0,2682	0/1:206,192:398:99:3993,0,4939
3	11768544	rs316809455	3:11768544	8076.36	PASS	GT:AD:DP:GQ:PL	0/0:30,0:30:89:0,89,847	0/0:60,0:60:99:0,179,1686	0/0:24,0:24:71:0,71,678	0/0:79,0:79:99:0,233,2208	0/0:39,0:39:99:0,116,1080	0/0:35,0:35:99:0,105,999	0/1:84,87:171:99:2153,0,1827	0/1:84,72:156:99:1673,0,1776	0/1:162,167:329:99:4295,0,3414
3	11768598	rs313076966	3:11768598	8414.36	PASS	GT:AD:DP:GQ:PL	0/0:39,0:39:99:0,116,1078	0/0:52,0:52:99:0,154,1449	0/0:22,0:22:66:0,66,620	0/0:83,0:83:99:0,246,2312	0/0:37,0:37:99:0,110,1088	0/0:29,0:29:85:0,85,844	0/1:79,99:178:99:2212,0,1703	0/1:106,72:178:99:1491,0,2503	0/1:177,188:365:99:4756,0,4019
3	11936565	rs315954152	3:11936565	2056.36	PASS	GT:AD:DP:GQ:PL	0/0:87,0:87:99:0,259,2635	0/0:162,2:164:99:0,440,4722	0/0:100,0:100:99:0,298,2812	0/0:324,0:324:99:0,963,9222	0/0:145,0:145:99:0,430,4209	0/0:152,0:152:99:0,453,4504	0/1:53,43:96:99:972,0,1142	0/1:40,14:54:99:190,0,1036	0/1:48,42:90:99:939,0,1104
3	11937035	rs735287691	3:11937035	836.36	PASS	GT:AD:DP:GQ:PL	0/0:31,0:31:93:0,93,978	0/0:77,0:77:99:0,229,2416	0/0:45,0:45:99:0,134,1431	0/0:99,0:99:99:0,295,3020	0/0:83,0:83:99:0,248,2592	0/0:52,0:52:99:0,155,1700	0/1:18,9:27:99:177,0,467	0/1:15,9:24:99:234,0,382	0/1:10,20:30:99:470,0,215
3	12040861	rs312794960	3:12040861	1427.36	PASS	GT:AD:DP:GQ:PL	0/0:29,0:29:87:0,87,944	0/0:61,0:61:99:0,183,1939	0/0:31,0:31:92:0,92,894	0/0:164,0:164:99:0,488,4867	0/0:74,1:75:99:0,185,2260	0/0:68,0:68:99:0,202,2003	0/1:25,15:40:99:294,0,597	0/1:9,18:27:99:455,0,210	0/1:30,31:61:99:723,0,668
3	12041762	rs317413534	3:12041762	543.36	PASS	GT:AD:DP:GQ:PL	0/0:28,0:28:83:0,83,767	0/0:55,0:55:99:0,164,1594	0/0:31,0:31:91:0,91,768	0/0:133,0:133:99:0,392,3641	0/0:42,0:42:99:0,125,1211	0/0:45,0:45:99:0,133,1246	0/1:16,9:25:99:213,0,389	0/1:3,7:10:66:151,0,66	0/1:27,13:40:99:224,0,614
3	12068934	rs730968033	3:12068934	162.26	PASS	GT:AD:DP:GQ:PL	0/0:10,0:10:30:0,30,686	0/0:19,0:19:57:0,57,1047	0/0:15,0:15:45:0,45,798	0/0:2,0:2:6:0,6,124	0/0:4,0:4:12:0,12,279	0/0:2,0:2:6:0,6,49	0/1:6,6:12:99:120,0,381	0/1:7,1:8:12:12,0,447	0/1:6,5:11:73:73,0,360
3	12069563	rs14085375	3:12069563	57.62	PASS	GT:AD:DP:GQ:PL	0/0:23,0:23:68:0,68,589	0/0:29,0:29:86:0,86,752	0/0:15,0:15:43:0,43,329	0/0:9,0:9:27:0,27,252	0/0:2,0:2:6:0,6,62	0/0:4,0:4:12:0,12,107	0/1:7,3:10:80:80,0,146	0/1:12,2:14:7:7,0,308	0/1:7,1:8:12:12,0,182
3	21366972	rs737636330	3:21366972	40057.4	PASS	GT:AD:DP:GQ:PL	1/1:0,80:80:99:2281,239,0	1/1:1,160:161:99:4519,468,0	1/1:0,78:78:99:2185,231,0	1/1:2,421:423:99:11145,1223,0	1/1:0,216:216:99:5953,638,0	1/1:0,158:158:99:4420,468,0	0/1:75,115:190:99:2592,0,1584	0/1:122,126:248:99:2425,0,2718	0/1:153,193:346:99:4582,0,5484
3	21367108	rs317159847	3:21367108	35261.4	PASS	GT:AD:DP:GQ:PL	1/1:1,68:69:99:2012,169,0	1/1:0,140:140:99:4096,418,0	1/1:0,64:64:99:1757,189,0	1/1:0,358:358:99:10262,1064,0	1/1:0,167:167:99:4740,496,0	1/1:0,130:130:99:3749,388,0	0/1:66,117:183:99:2789,0,1251	0/1:113,96:209:99:2094,0,2336	0/1:111,152:263:99:3807,0,2323
3	21505129	.	3:21505129	19290.4	PASS	GT:AD:DP:GQ:PL	1/1:0,36:36:99:1157,107,0	1/1:0,56:56:99:1798,170,0	1/1:0,26:26:81:802,81,0	1/1:0,180:180:99:5615,537,0	1/1:0,65:65:99:2047,194,0	1/1:0,62:62:99:1934,185,0	0/1:36,65:101:99:1663,0,1310	0/1:38,56:94:99:1342,0,865	0/1:50,114:164:99:2977,0,1605
3	21508151	rs312769004	3:21508151	137958	PASS	GT:AD:DP:GQ:PL	1/1:2,324:326:99:10083,953,0	1/1:0,536:536:99:16843,1605,0	1/1:0,281:281:99:8284,838,0	1/1:2,1011:1013:99:31377,2987,0	1/1:1,627:628:99:19492,1870,0	1/1:0,536:536:99:16933,1607,0	0/1:313,384:697:99:9668,0,6784	0/1:241,397:638:99:9857,0,5017	0/1:413,603:1016:99:15466,0,9461
3	21511339	rs314009812	3:21511339	97701.4	PASS	GT:AD:DP:GQ:PL	1/1:1,270:271:99:7998,798,0	1/1:0,436:436:99:13297,1305,0	1/1:0,194:194:99:5662,556,0	1/1:0,533:533:99:16839,1591,0	1/1:0,441:441:99:13473,1319,0	1/1:0,462:462:99:14176,1383,0	0/1:207,313:520:99:8615,0,4814	0/1:191,305:496:99:8310,0,4254	0/1:259,331:590:99:9376,0,6194
3	26451036	rs740748482	3:26451036	634.57	PASS	GT:AD:DP:GQ:PL	0/0:5,0:5:15:0,15,136	0/0:6,0:6:18:0,18,196	0/0:9,0:9:27:0,27,238	0/0:22,0:22:66:0,66,609	0/0:5,0:5:15:0,15,161	0/0:7,0:7:21:0,21,184	0/1:20,10:30:99:216,0,477	0/1:11,8:19:99:208,0,256	0/1:10,11:21:99:255,0,267
3	26451787	rs317967968	3:26451787	1815.68	PASS	GT:AD:DP:GQ:PL	1/1:0,9:9:27:233,27,0	1/1:0,8:8:24:223,24,0	1/1:0,4:4:12:105,12,0	1/1:0,5:5:15:161,15,0	1/1:0,8:8:24:245,24,0	1/1:0,5:5:15:132,15,0	0/1:10,2:12:37:37,0,281	0/1:7,14:21:99:340,0,101	0/1:17,16:33:99:384,0,303
3	28863762	rs10722728	3:28863762	60109.4	PASS	GT:AD:DP:GQ:PL	1/1:0,123:123:99:3907,369,0	1/1:1,380:381:99:11606,1137,0	1/1:0,163:163:99:4804,487,0	1/1:1,443:444:99:13839,1319,0	1/1:0,202:202:99:5906,603,0	1/1:0,205:205:99:6108,614,0	0/1:152,174:326:99:4314,0,3561	0/1:113,118:231:99:2959,0,2666	0/1:201,261:462:99:6711,0,4883
3	28863795	rs315243689	3:28863795	58846.4	PASS	GT:AD:DP:GQ:PL	1/1:0,134:134:99:3975,401,0	1/1:0,390:390:99:11354,1165,0	1/1:0,146:146:99:4243,434,0	1/1:0,473:473:99:14056,1411,0	1/1:0,180:180:99:5425,538,0	1/1:0,196:196:99:5846,586,0	0/1:160,179:339:99:4257,0,3182	0/1:117,122:239:99:2747,0,2312	0/1:226,281:507:99:6988,0,4993
3	28864113	rs732257436	3:28864113	16327.4	PASS	GT:AD:DP:GQ:PL	1/1:0,42:42:99:1227,124,0	1/1:0,134:134:99:3879,396,0	1/1:0,45:45:99:1314,133,0	1/1:0,106:106:99:3096,315,0	1/1:0,48:48:99:1523,144,0	1/1:0,28:28:82:793,82,0	0/1:48,38:86:99:843,0,1153	0/1:33,56:89:99:1347,0,779	0/1:111,99:210:99:2350,0,2745
3	28864260	rs314914029	3:28864260	24483.4	PASS	GT:AD:DP:GQ:PL	1/1:0,48:48:99:1583,144,0	1/1:0,173:173:99:5501,519,0	1/1:1,64:65:99:1945,183,0	1/1:0,163:163:99:4947,482,0	1/1:0,63:63:99:1933,187,0	1/1:1,47:48:99:1486,133,0	0/1:64,64:128:99:1511,0,1548	0/1:35,66:101:99:1754,0,740	0/1:133,145:278:99:3868,0,3023
3	28864735	rs314464065	3:28864735	27336.4	PASS	GT:AD:DP:GQ:PL	1/1:0,74:74:99:2007,220,0	1/1:0,208:208:99:5740,620,0	1/1:0,74:74:99:2105,221,0	1/1:0,250:250:99:6705,742,0	1/1:0,69:69:99:2045,207,0	1/1:0,45:45:99:1273,135,0	0/1:103,93:196:99:1960,0,2301	0/1:64,72:136:99:1528,0,1335	0/1:142,180:322:99:4018,0,3083
3	28864821	rs736367812	3:28864821	11997.4	PASS	GT:AD:DP:GQ:PL	1/1:0,25:25:75:863,75,0	1/1:0,82:82:99:2392,245,0	1/1:0,32:32:96:977,96,0	1/1:0,100:100:99:2699,295,0	1/1:0,32:32:96:1004,96,0	1/1:0,28:28:84:893,84,0	0/1:30,41:71:99:965,0,796	0/1:27,28:55:99:671,0,644	0/1:47,63:110:99:1578,0,1121
3	30214846	rs13722112	3:30214846	9370.36	PASS	GT:AD:DP:GQ:PL	0/0:113,0:113:99:0,337,3398	0/0:186,0:186:99:0,556,5318	0/0:94,0:94:99:0,279,2506	0/0:424,0:424:99:0,1261,12057	0/0:211,0:211:99:0,629,6082	0/0:209,0:209:99:0,623,5729	0/1:163,153:316:99:3148,0,3822	0/1:128,108:236:99:1947,0,2847	0/1:197,198:395:99:4320,0,4494
3	30215686	rs315513924	3:30215686	19481.4	PASS	GT:AD:DP:GQ:PL	0/0:160,0:160:99:0,485,6976	0/0:233,0:233:99:0,700,9817	0/0:133,0:133:99:0,400,5762	0/0:611,0:611:99:0,1842,25918	0/0:290,0:290:99:0,882,12607	0/0:290,0:290:99:0,875,12460	0/1:255,103:358:99:2787,0,10002	0/1:181,151:332:99:5838,0,6776	0/1:270,282:552:99:10901,0,9767
3	30215783	rs318123593	3:30215783	16406.4	PASS	GT:AD:DP:GQ:PL	0/0:176,0:176:99:0,529,7183	0/0:296,0:296:99:0,897,12540	0/0:135,0:135:99:0,408,5567	0/0:787,1:788:99:0,2361,32171	0/0:334,0:334:99:0,1001,13627	0/0:365,0:365:99:0,1103,15251	0/1:249,131:380:99:4436,0,9319	0/1:174,89:263:99:2994,0,6387	0/1:262,248:510:99:9021,0,9555
3	30215803	rs313850652	3:30215803	15876.3	PASS	GT:AD:DP:GQ:PL	0/0:158,0:158:99:0,477,6616	0/0:281,0:281:99:0,850,11961	0/0:133,0:133:99:0,400,5510	0/0:775,0:775:99:0,2339,31785	0/0:303,0:303:99:0,920,12715	0/0:355,0:355:99:0,1081,15003	0/1:223,152:375:99:4895,0,8409	0/1:152,79:231:99:2680,0,5819	0/1:238,231:469:99:8355,0,8980
3	30215836	rs317678901	3:30215836	9999.36	PASS	GT:AD:DP:GQ:PL	0/0:137,0:137:99:0,408,4035	0/0:238,0:238:99:0,710,6724	0/0:104,0:104:99:0,309,2890	0/0:712,0:712:99:0,2113,20072	0/0:269,0:269:99:0,800,7680	0/0:302,0:302:99:0,900,8858	0/1:180,156:336:99:3295,0,4273	0/1:117,93:210:99:1854,0,2691	0/1:192,213:405:99:4895,0,4441
3	30215885	rs313245702	3:30215885	11469.4	PASS	GT:AD:DP:GQ:PL	0/0:142,0:142:99:0,423,4060	0/0:247,0:247:99:0,736,7138	0/0:120,0:120:99:0,357,3460	0/0:815,0:815:99:0,2428,23115	0/0:272,0:272:99:0,811,7844	0/0:306,0:306:99:0,909,8682	0/1:180,163:343:99:3628,0,4358	0/1:143,94:237:99:1994,0,3377	0/1:195,240:435:99:5892,0,4694
3	30216165	rs316501220	3:30216165	12357.4	PASS	GT:AD:DP:GQ:PL	0/0:160,0:160:99:0,478,4720	0/0:270,0:270:99:0,807,7894	0/0:123,0:123:99:0,368,3535	0/0:724,0:724:99:0,2164,20637	0/0:347,0:347:99:0,1037,10196	0/0:317,0:317:99:0,946,8981	0/1:223,178:401:99:3735,0,5382	0/1:216,152:368:99:3176,0,5129	0/1:314,250:564:99:5491,0,7339
3	30216416	rs317960824	3:30216416	11486.4	PASS	GT:AD:DP:GQ:PL	0/0:161,0:161:99:0,479,4892	0/0:282,0:282:99:0,840,8182	0/0:143,0:143:99:0,428,4393	0/0:762,1:763:99:0,2254,22149	0/0:328,0:328:99:0,982,9790	0/0:323,0:323:99:0,964,9348	0/1:235,178:413:99:3395,0,5943	0/1:166,135:301:99:2616,0,4277	0/1:300,257:557:99:5520,0,7065
3	30247175	rs315170967	3:30247175	13373.4	PASS	GT:AD:DP:GQ:PL	0/0:276,0:276:99:0,824,9162	0/0:487,0:487:99:0,1455,15822	0/0:194,0:194:99:0,580,6078	0/0:829,0:829:99:0,2475,27467	0/0:488,0:488:99:0,1461,15761	0/0:507,0:507:99:0,1518,16576	0/1:191,121:312:99:2350,0,5246	0/1:256,199:455:99:4249,0,7052	0/1:326,294:620:99:6819,0,8793
3	30247569	rs16247241	3:30247569	13163.4	PASS	GT:AD:DP:GQ:PL	0/0:284,0:284:99:0,848,8679	0/0:600,0:600:99:0,1793,18221	0/0:237,0:237:99:0,705,6910	0/0:1022,1:1023:99:0,3006,31379	0/0:544,0:544:99:0,1621,16760	0/0:614,0:614:99:0,1830,19153	0/1:213,135:348:99:3200,0,5163	0/1:259,169:428:99:3762,0,6526	0/1:370,270:640:99:6246,0,9356
3	30249827	rs316221266	3:30249827	11986.4	PASS	GT:AD:DP:GQ:PL	0/0:340,0:340:99:0,1010,9955	0/0:535,0:535:99:0,1601,17190	0/0:282,0:282:99:0,838,8129	0/0:756,0:756:99:0,2241,24186	0/0:477,0:477:99:0,1416,14987	0/0:548,0:548:99:0,1623,17064	0/1:239,176:415:99:3513,0,5769	0/1:333,174:507:99:3281,0,8781	0/1:336,232:568:99:5237,0,8687
3	30250921	rs312411049	3:30250921	10864.4	PASS	GT:AD:DP:GQ:PL	0/0:273,0:273:99:0,815,8587	0/0:414,0:414:99:0,1240,13556	0/0:257,0:257:99:0,773,7880	0/0:552,0:552:99:0,1650,19138	0/0:423,0:423:99:0,1265,14072	0/0:403,0:403:99:0,1208,14016	0/1:238,147:385:99:2957,0,6258	0/1:267,158:425:99:3238,0,7189	0/1:319,203:522:99:4714,0,8840
3	30251005	rs16247245	3:30251005	14655.4	PASS	GT:AD:DP:GQ:PL	0/0:332,0:332:99:0,994,10102	0/0:514,0:514:99:0,1540,15862	0/0:261,0:261:99:0,785,8366	0/0:1354,0:1354:99:0,4037,40476	0/0:565,0:565:99:0,1690,17444	0/0:635,0:635:99:0,1903,20205	0/1:256,154:410:99:3174,0,6740	0/1:310,187:497:99:4228,0,8149	0/1:381,312:693:99:7298,0,9664
3	30251485	rs316298757	3:30251485	13854.4	PASS	GT:AD:DP:GQ:PL	0/0:318,0:318:99:0,948,9087	0/0:531,0:531:99:0,1588,15470	0/0:245,1:246:99:0,698,7151	0/0:736,4:740:99:0,2090,22011	0/0:541,0:541:99:0,1612,15797	0/0:612,2:614:99:0,1781,18619	0/1:243,125:368:99:2786,0,6296	0/1:295,173:468:99:4184,0,7238	0/1:313,265:578:99:6929,0,7889
3	30540558	rs315988942	3:30540558	1216.36	PASS	GT:AD:DP:GQ:PL	0/0:24,0:24:72:0,72,739	0/0:150,0:150:99:0,447,4419	0/0:134,0:134:99:0,398,3933	0/0:268,0:268:99:0,795,7939	0/0:46,0:46:99:0,136,1319	0/0:154,0:154:99:0,456,4398	0/1:22,12:34:99:311,0,549	0/1:32,21:53:99:527,0,841	0/1:24,17:41:99:423,0,592
3	30548185	rs312926876	3:30548185	1091.36	PASS	GT:AD:DP:GQ:PL	0/0:26,0:26:78:0,78,782	0/0:132,0:132:99:0,394,3711	0/0:115,0:115:99:0,344,3297	0/0:320,0:320:99:0,952,9016	0/0:50,0:50:99:0,150,1337	0/0:199,0:199:99:0,593,5584	0/1:30,9:39:99:144,0,760	0/1:32,17:49:99:333,0,859	0/1:25,27:52:99:659,0,624
3	30568764	rs316616788	3:30568764	1002.36	PASS	GT:AD:DP:GQ:PL	0/0:16,0:16:48:0,48,463	0/0:115,0:115:99:0,343,3364	0/0:102,0:102:99:0,303,2741	0/0:258,0:258:99:0,765,7043	0/0:36,0:36:99:0,107,1064	0/0:134,0:134:99:0,399,3859	0/1:31,10:41:99:170,0,738	0/1:26,21:47:99:481,0,611	0/1:25,19:44:99:396,0,577
3	30667150	rs738345457	3:30667150	6978.38	PASS	GT:AD:DP:GQ:PL	1/1:0,13:13:38:309,38,0	1/1:0,27:27:80:737,80,0	1/1:0,28:28:82:736,82,0	1/1:0,114:114:99:3147,333,0	1/1:0,11:11:31:243,31,0	1/1:0,50:50:99:1296,145,0	0/1:2,5:7:29:112,0,29	0/1:9,13:22:99:214,0,197	0/1:3,8:11:51:229,0,51
[truncated: 1,164 more rows]

## Sheet: Supplementary file 5E
Supplementary file 5E. Detected maternal SNPs in multiomics analysis
[truncated: 1,545 more rows]
