# Supplementary material for: Zygotic gene activation in the chicken occurs in two waves, the first involving only maternally derived genes
Source: eLife journal article supplement (doi:10.7554/elife.39381), 2018-10-30
Supplement: supp [file elife-39381-supp-v1.zip › elife_poa_e39381_Supplementary_File_6.xlsx]

## Sheet: Supplementary file 6A
Supplementary file 6A. Primers used for the exon–intron RT-PCR
Gene name	Wave	Location	Primer sequences
			Forward (5’→3’)	Reverse (5’→3’)
DLX6	1st	Exon 3 - Intron 3	CCACACCAAGACACAATGCA	CTCCTTTCCTCTCCCCGTTT
GATA2	1st	Exon 3 - Intron 3	AGGGATGAAGATGGAGAGCG	TTTGTACGTGCGATCTGCTG
ZIC4	1st	Intron 2 - Exon 3	CTCTCCGGTCACACAGAGG	CCAGGTTCACGTTCAGGTTC
LYPD2	1st	Intron 2 - Exon 3	GAACTGGTGCTTCAGTGGTG	CCAACTGGCACAAAGCTGAT
IFITM5	1st	Exon 1 - Intron 1	GGATACATCCTACCCACGGG	ATAACCCTGAACACCCCCAC
NKX6-3	1st	Intron 1- Exon 2	CAAGGTCGAAACTGTGGAGC	CCAGGTACTTGGTCTGCTCA
WNT11	2nd	Exon 4 - Intron 4	AGACATTGCACTGGACCTCA	TTTAAGGCTGCCTGGAAGGA
WNT3A	2nd	Exon 2 - Intron 2	GGGGTGAAGATTGGGATCCA	ACCTTACACCAGAGAGCCAC
C8ORF22	2nd	Intron 1 - Exon 2	GTGCACCCAACCTGGTTAAG	TGGATTCCGAGTTCTGCCTT
NAT8L	2nd	Exon 1 - Intron 1	AAGTCCTTCCTGCTGACCTG	CTGCTGCAAAGAGGACAAGG
PCOLCE2	2nd	Exon 8 - Intron 8	GCAGTGTCCTCTCCTCAGAA	CGGCTTTTCAAAGTCCCTTGA
AKAP2	2nd	Exon 2 - Intron 2	CCTGATGGAGACCCTCATGG	ATCCTTGCATTTCGGACGTG

## Sheet: Supplementary file 6B
Supplementary file 6B. Primers used for the validation of allelic expression
Gene name	SNP ID	Primer sequences
		Forward (5’→3’)	Reverse (5’→3’)
MAP7D1	rs735616631, rs737091869, rs317162724, rs312431159	TCACGCTGGAAATGCTTCTC	AGAAGAAGGAGAAGGAGCGG
	rs732500851	GCGGTTTCTACTGGGAGAGT	CTGCATCACCATCTTCAGCC
ESCO1	rs314014865, rs312569361, rs317102766, rs315302113	TGCTGCTAAGAACGGGAGAT	ACACGCATGACTACAAGGTC
CCNB3	rs731100154, rs739402820	CCTCATCGCCTCCAAATTCG	ATCATGTCCATGGGGGTTGT
SYTL4	rs313237661, rs317531504, rs315733912, rs317004903, rs317743001	GGACAGACTCTCCTGCAGAA	TCGTTGTACAGCGGGTTTAC
GRHL1	rs15435942, rs313477995, rs316662644	ACAAGGTTCCAAGGGAGAGG	GGATTCCTTCACTGCTGCTG
LLGL1	rs314448475	CAAAGCGTGCCCGATGATTA	GGTTCTCAAAGCCTCCCTCT
	rs315560932, rs735260738	CTGGTGATGGAGCTGAGTGA	AGGAGATGAGCATGGAGTGG
