# Supplementary figures and images for: Zygotic gene activation in the chicken occurs in two waves, the first involving only maternally derived genes
Source: eLife journal article supplement (doi:10.7554/elife.39381), 2018-10-30

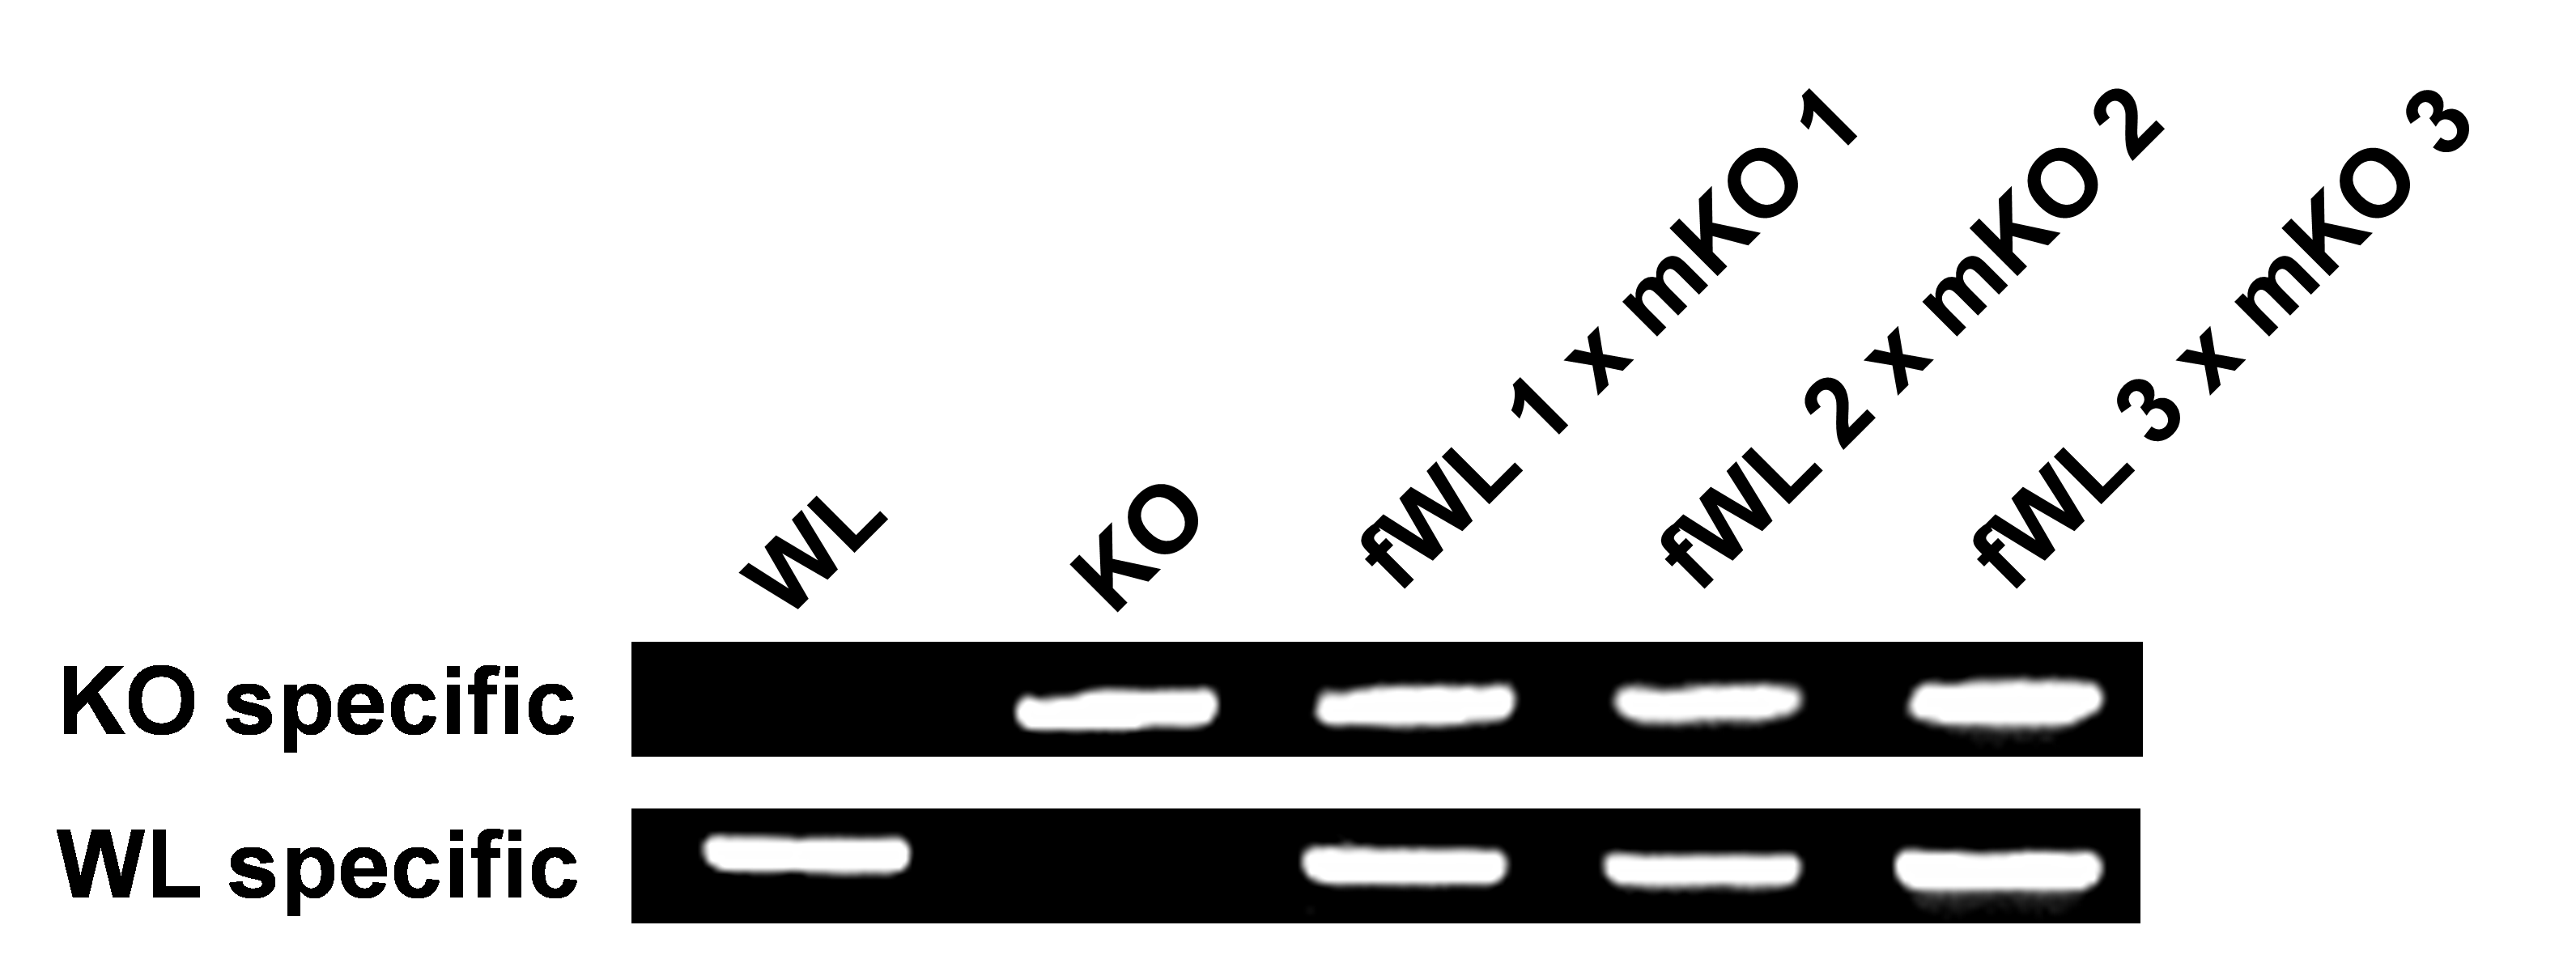

Supplement: supp [file elife-39381-supp-v1.zip › elife_poa_e39381_Figure_3_figure_supplement_1.tif]

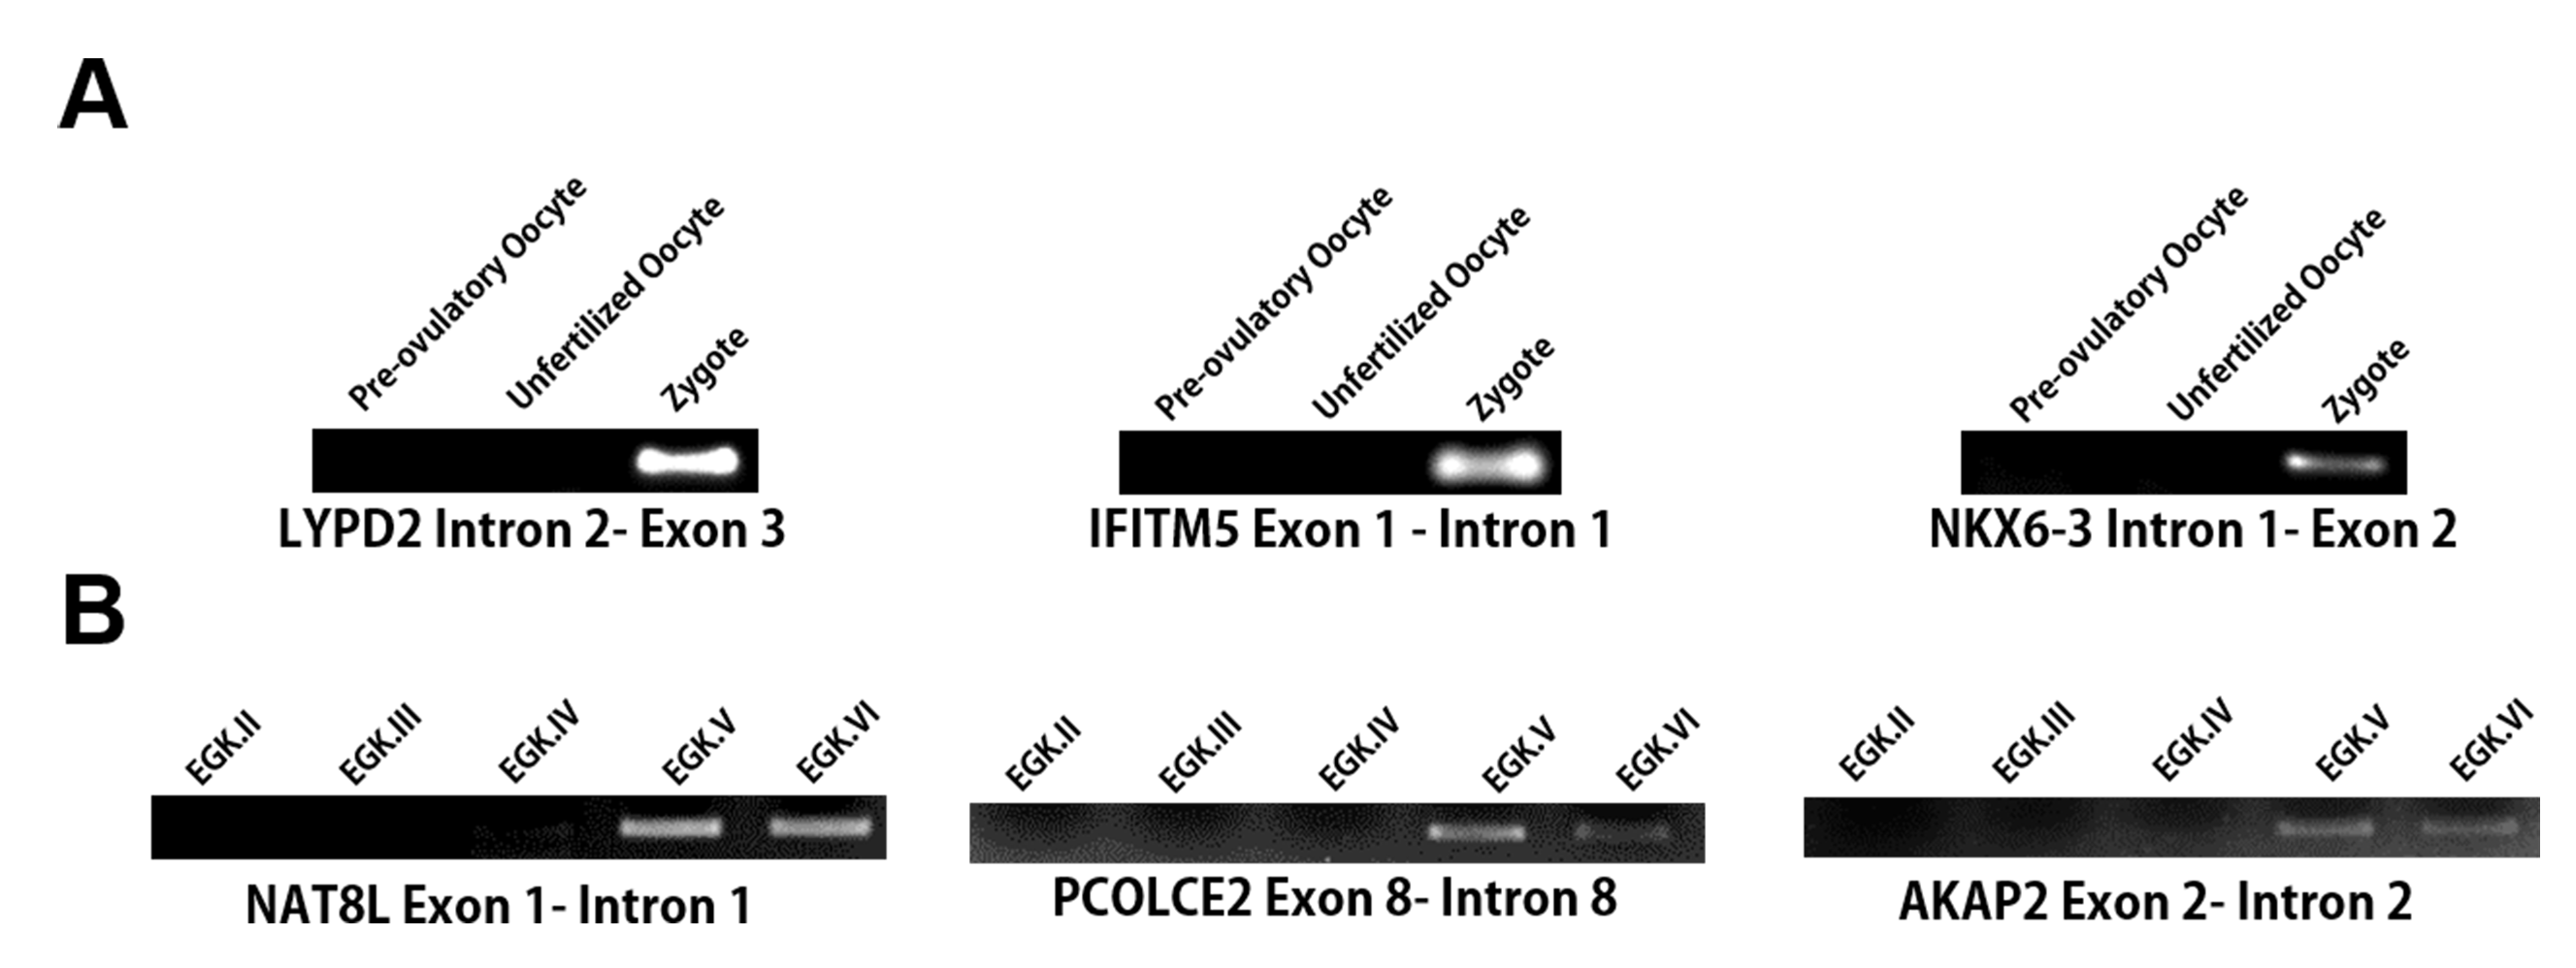

Supplement: supp [file elife-39381-supp-v1.zip › elife_poa_e39381_Figure_2_figure_supplement_1.tif]

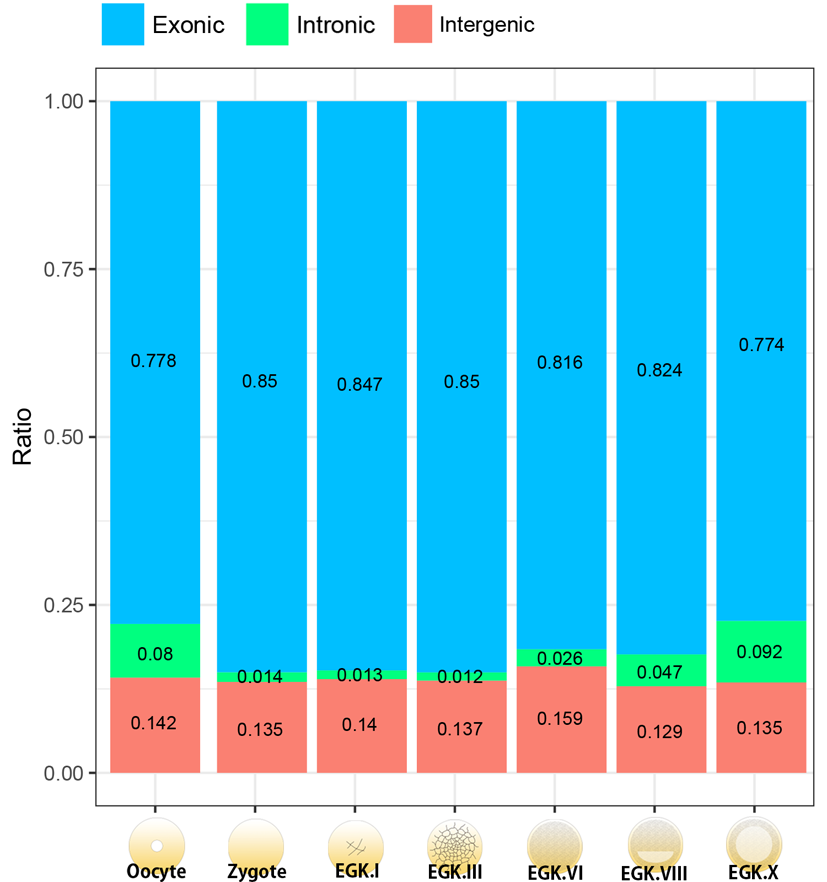

Supplement: supp [file elife-39381-supp-v1.zip › elife_poa_e39381_Figure_1_figure_supplement_2.tif]

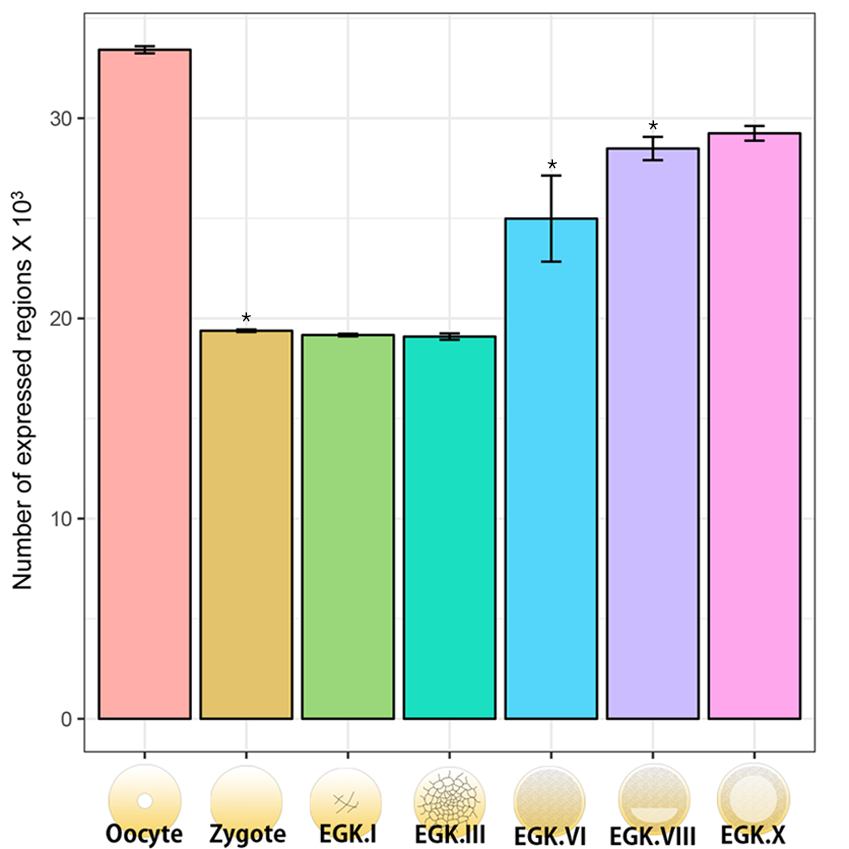

Supplement: supp [file elife-39381-supp-v1.zip › elife_poa_e39381_Figure_1_figure_supplement_1.tif]

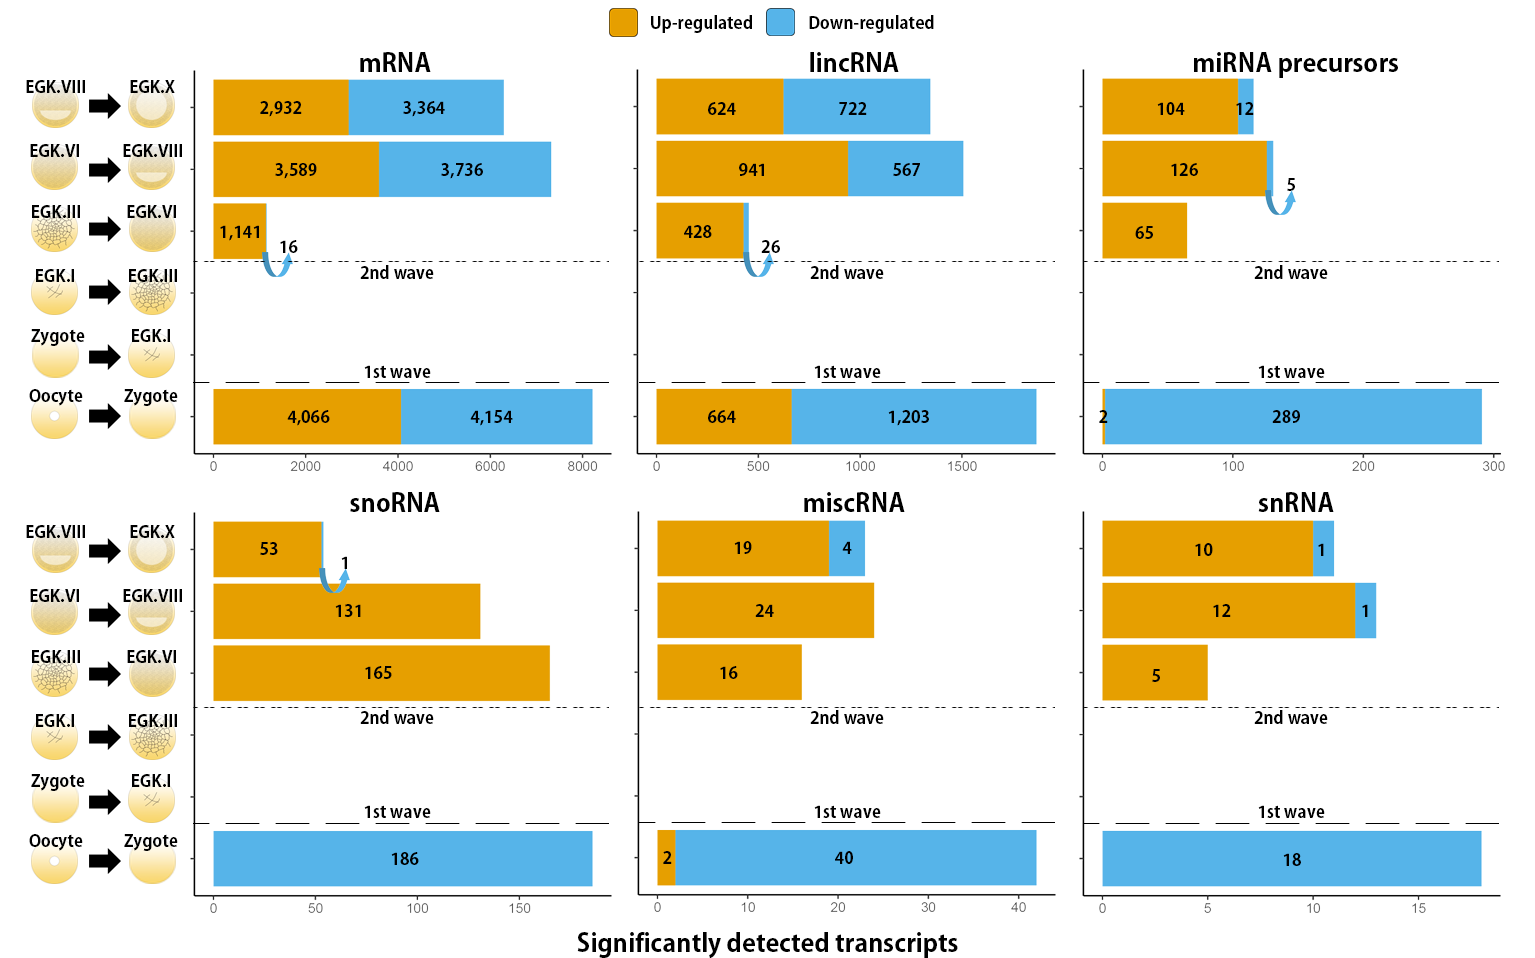

Supplement: supp [file elife-39381-supp-v1.zip › elife_poa_e39381_Figure_1_figure_supplement_3.tif]

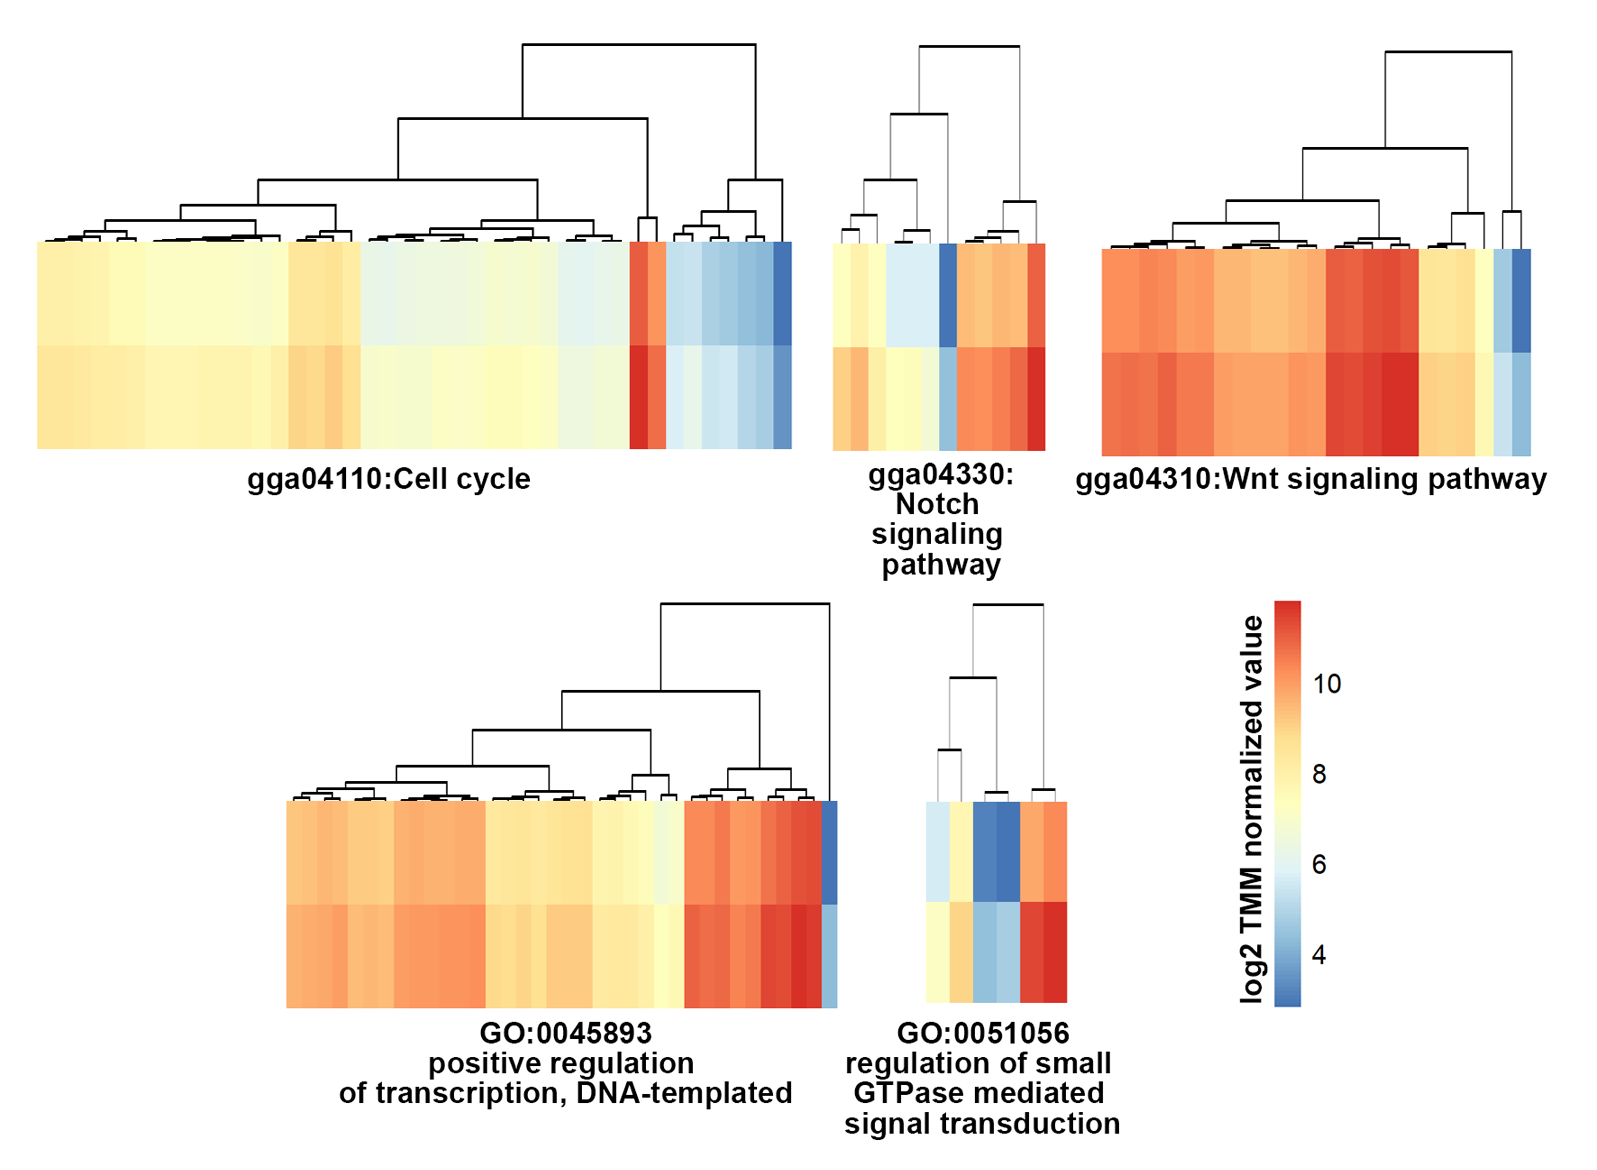

Supplement: supp [file elife-39381-supp-v1.zip › elife_poa_e39381_Figure_4_figure_supplement_1.tif]

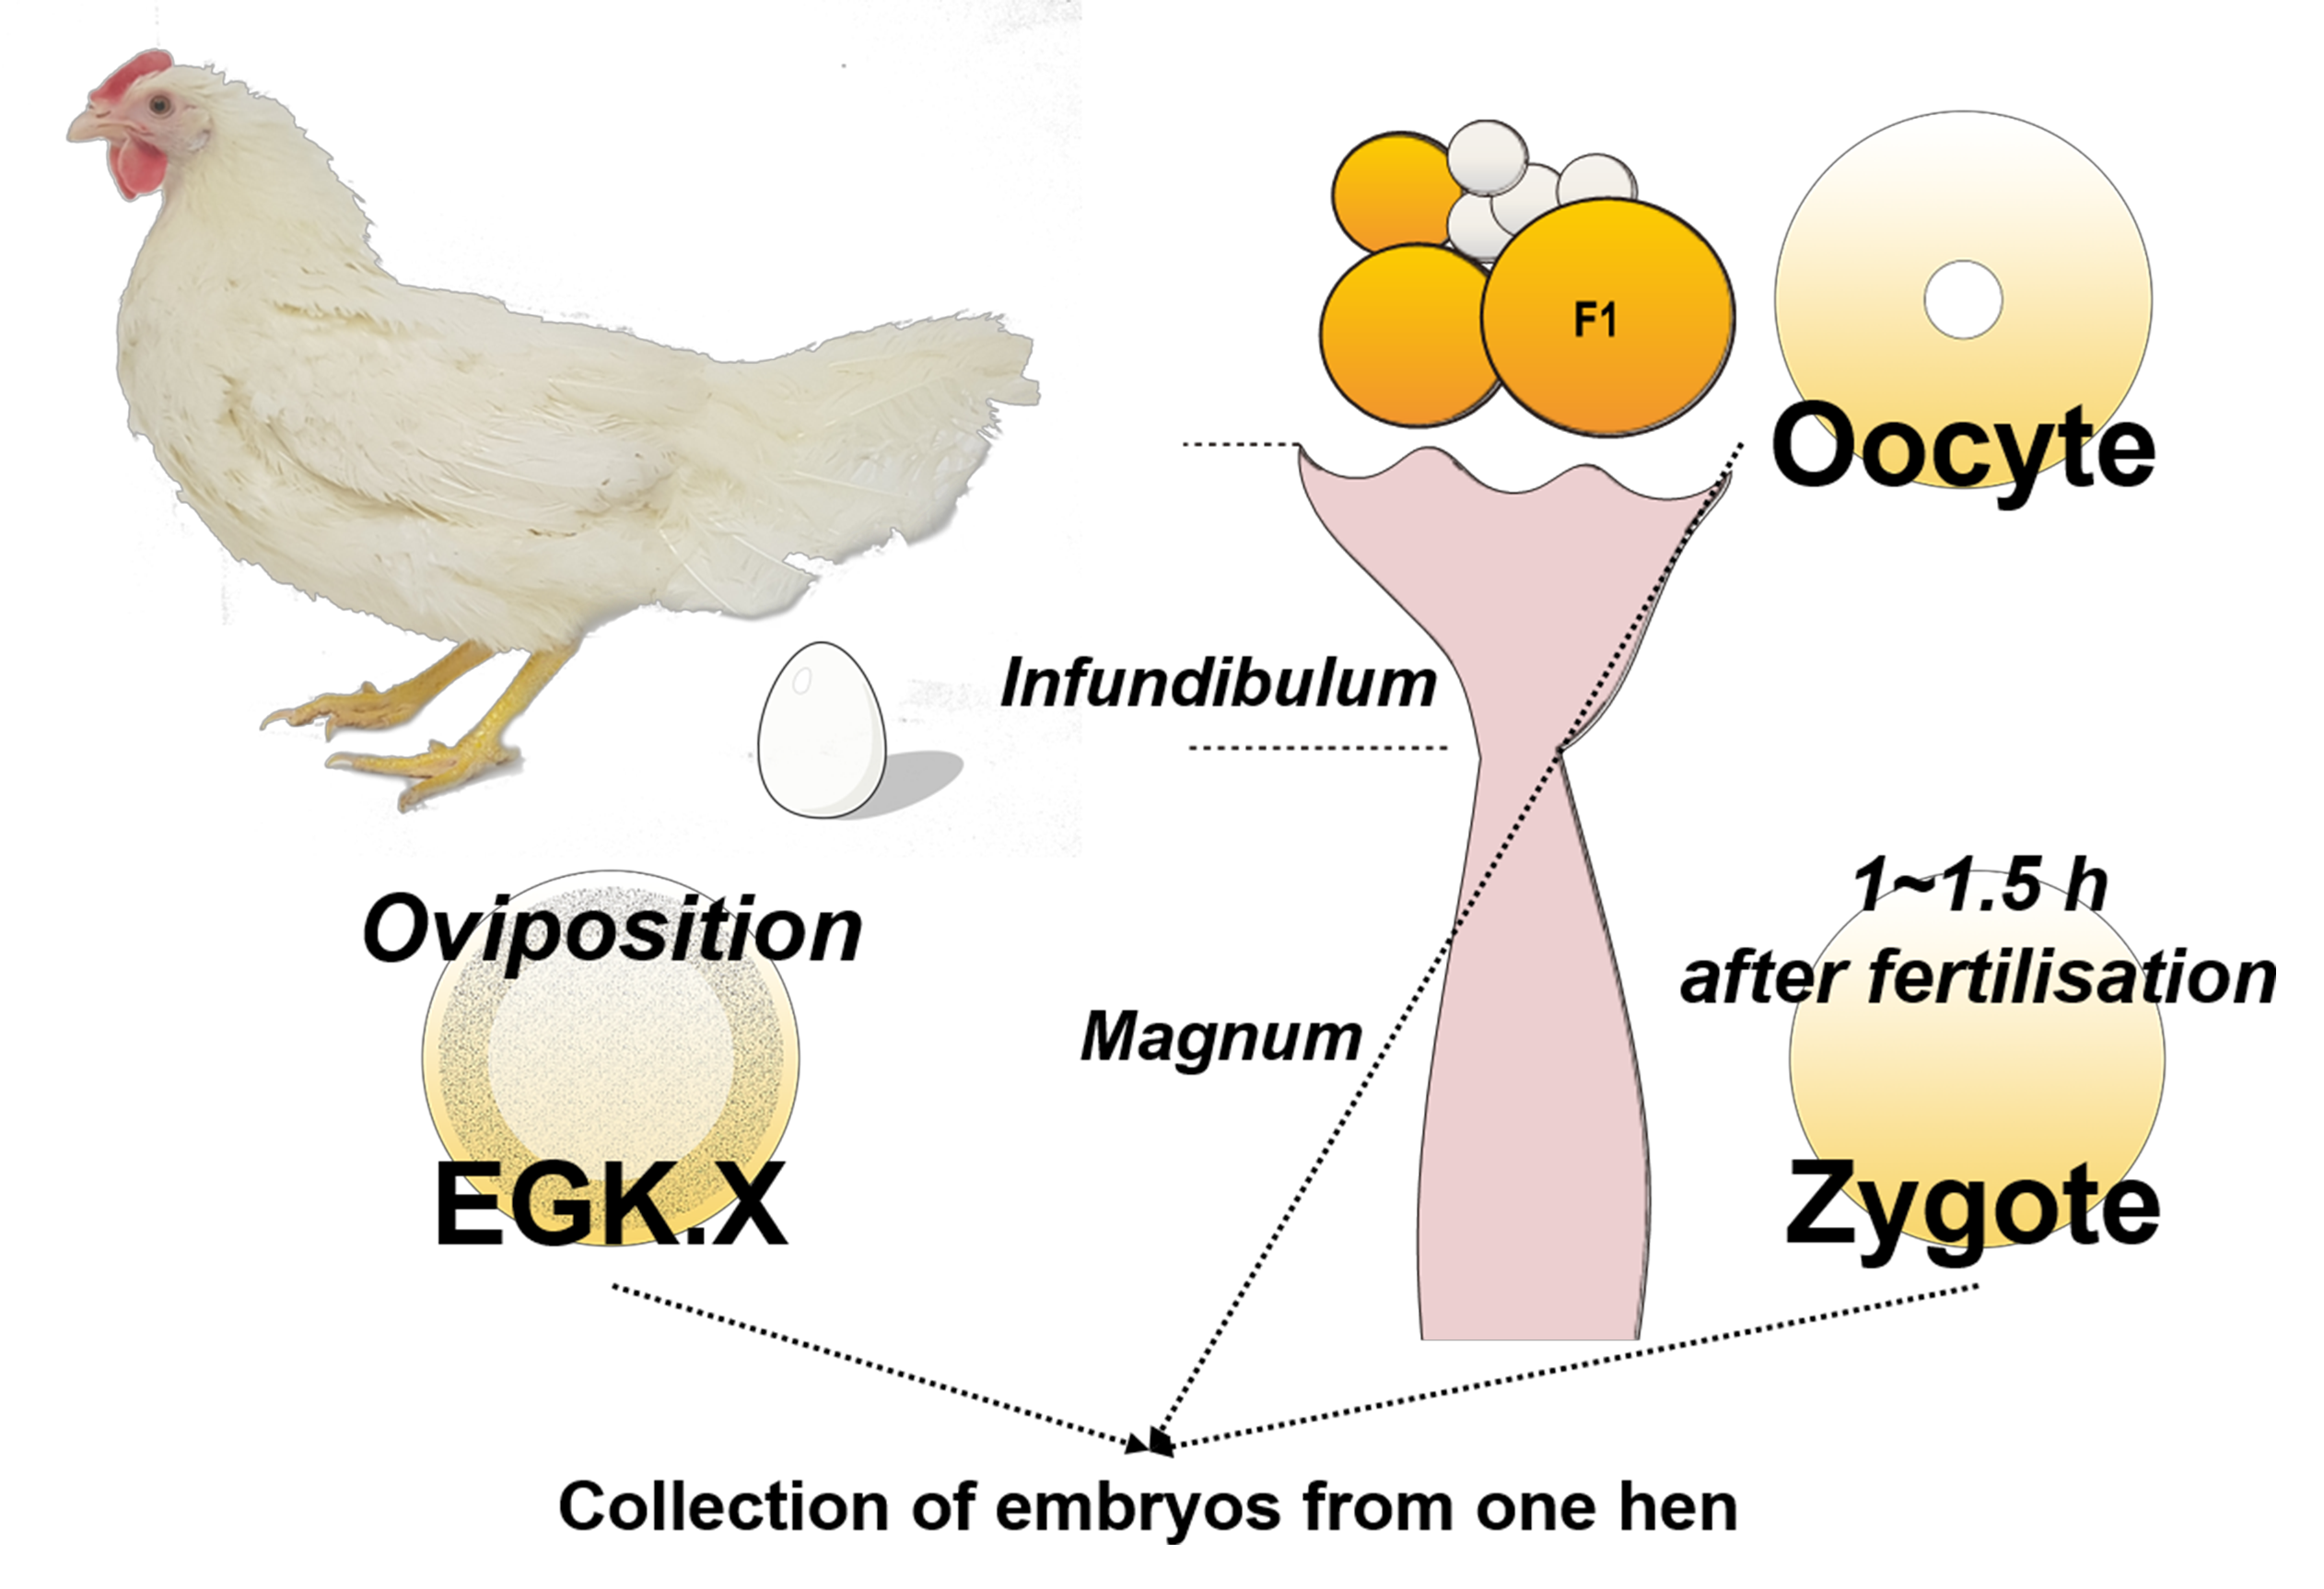

Supplement: supp [file elife-39381-supp-v1.zip › elife_poa_e39381_Figure_3_figure_supplement_2.tif]
